# Supplementary material for: Biological Evaluation of the Effect of Root Canal Sealers Using a Rat Model
Source: MDPI journal article supplement (doi:10.3390/pharmaceutics14102038), 2022-09-24
Supplement: s1 [file s1]

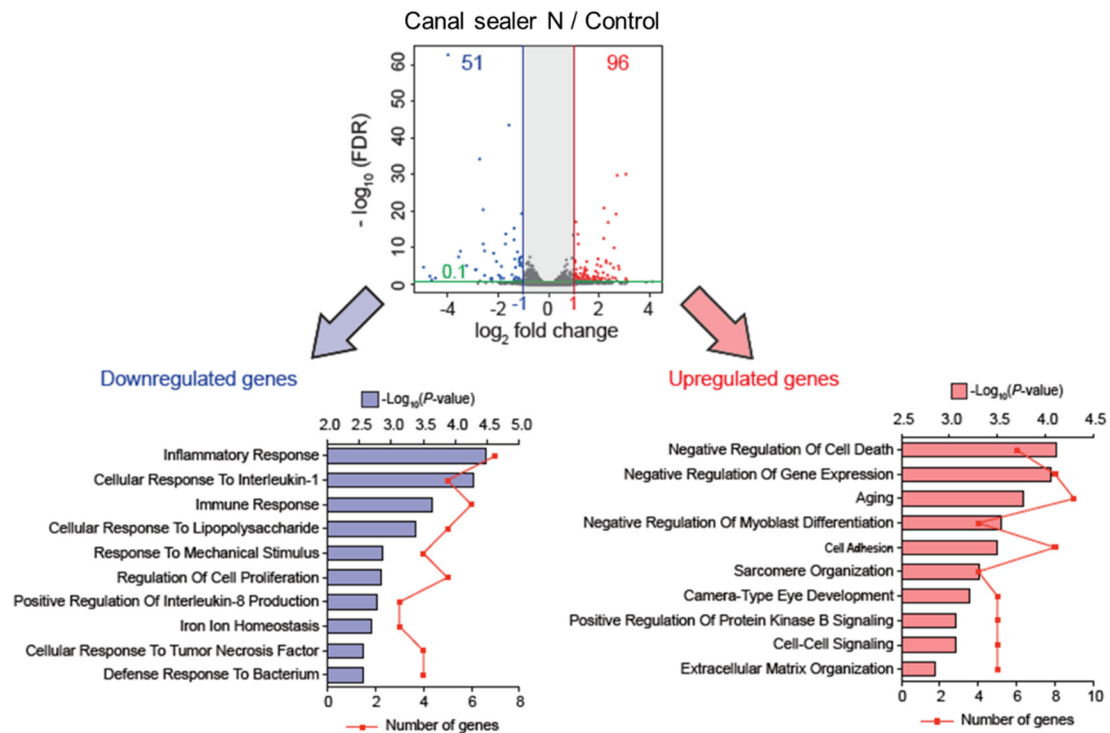

**Supplemental Figure S1. GO terms of differentially upregulated or downregulated genes in Canal sealer N.**

Volcano plots show gene expression differences under the comparison with control group. Colored circles indicate significantly upregulated (red) and downregulated (blue) genes (absolute  $\log_2$  fold change,  $>1$ ; adjusted  $p < 0.1$ ). Top 6 unique GO terms are listed in each section. The expression of genes related to inflammatory response and immune response was also downregulated in the Canal Sealer N group, which showed a fluctuation in the expression of a small number of genes, suggesting that these sealers may have a unique inflammation-modulating effect.
