# Supplementary material for: Biological Evaluation of the Effect of Root Canal Sealers Using a Rat Model
Source: Pharmaceutics. 2022 Sep 24;14(10):2038. doi: 10.3390/pharmaceutics14102038 (PMC9606985; doi:10.3390/pharmaceutics14102038)
Supplement: Supplementary file 1 [file pharmaceutics-14-02038-s001.zip]

Archive with 4 entries (4 files):
- 20210131Dataset1.xlsx
- 20210131Dataset2.xlsx
- 20210131Dataset3.xlsx
- pharmaceutics-1917447-Supplementary.pdf
