# Supplementary material for: Biological Evaluation of the Effect of Root Canal Sealers Using a Rat Model
Source: Pharmaceutics. 2022 Sep 24;14(10):2038. doi: 10.3390/pharmaceutics14102038 (PMC9606985; doi:10.3390/pharmaceutics14102038)
Supplement: Supplementary file 1 [file pharmaceutics-14-02038-s001.zip › 20210131Dataset1.xlsx]

## Sheet: Control vs Canals
Dataset 1-1: Global gene expression changes of Canals group, as compared to those of control group.
Gene symbol	Gene name	log2 FC	FDR	Control_1 count	Control_2 count	Canals_1 count	Canals_2 count
2021-03-01	-	-0.0597894	0.99576	113	215	128	158
2021-03-01	-	-0.155823	0.974716	113	215	128	158
2021-03-02	-	-0.0369771	0.993678	655	685	512	666
2021-03-02	-	-0.0579207	0.975513	655	685	512	666
2021-03-03	-	0.0169972	0.99576	257	355	225	288
2021-03-05	-	-0.146915	0.887928	527	560	435	599
2021-03-06	-	-0.128538	0.896205	1098	1242	1026	1138
2021-03-07	-	-0.183804	0.795085	528	646	508	625
2021-03-08	-	-0.0194187	0.99576	1402	2101	1313	1689
2021-03-09	-	-0.310839	0.943339	37	42	27	59
2021-03-10	-	-0.0659188	NA	2	6	3	4
2021-09-01	-	-0.0222292	0.99576	131	139	105	129
2021-09-02	-	0.0158416	0.99576	9360.5	12278	8040.5	10108.5
2021-09-03	-	0.010354	NA	12	7	5	12
2021-09-04	-	0.425435	0.687064	339	290	175.5	228
2021-09-05	-	-0.114616	0.982416	283.5	386	254	366.5
2021-09-06	-	0.0692977	0.983358	364	587	324	444
2021-09-07	-	-0.0527328	0.974637	3587	4525	3241	3882
2021-09-08	-	-0.104265	0.945383	2300	3445	2295	2922
2021-09-09	-	-0.24428	0.319733	2434	2636	2219	2925
2021-09-10	-	0.101046	0.975513	263	381	210	302
2021-09-11	-	0.352	0.658746	544	698	349	482
2021-09-15	-	0.0507198	0.971539	5091	6037	4060	5082
A2m	alpha-2-macroglobulin	3.06106	9.48e-31	1150	1761	144	147
A3galt2	alpha 1,3-galactosyltransferase 2 (isoglobotriaosylceramide synthase)	-0.114032	0.935129	1133	1203	945	1219
AA926063	-	-1.16844	0.495625	28	54	77	75
Aaas	achalasia, adrenocortical insufficiency, alacrimia	-0.0538046	0.990854	222	265	172	263
Aacs	acetoacetyl-CoA synthetase	0.600544	0.0645202	302	362	156	219
Aaed1	-	-0.377998	0.878594	63	85	69	95
Aagab	alpha- and gamma-adaptin binding protein	0.225588	0.86307	221	325	179	215
Aak1	AP2 associated kinase 1	0.133554	0.963933	239	361	205	257
Aamdc	adipogenesis associated Mth938 domain containing	-0.191838	0.959309	162	115	121	153
Aamp	angio-associated migratory protein	-0.116432	0.917293	1575.5	1807	1201.5	1978.5
Aar2	AAR2 splicing factor homolog	0.175971	0.920972	300	278	203	234
Aard	alanine and arginine rich domain containing protein	0.754106	0.905194	13	96	21	32
Aars	alanyl-tRNA synthetase	-0.299868	0.352707	1305	1763	1329	1898
Aars2	alanyl-tRNA synthetase 2, mitochondrial	0.326414	0.797281	131	143	81	106
Aarsd1	alanyl-tRNA synthetase domain containing 1	-0.0635452	0.990854	318	532	305	450
Aasdhppt	aminoadipate-semialdehyde dehydrogenase-phosphopantetheinyl transferase	-0.467694	0.0985676	467	590	551	691
Aass	aminoadipate-semialdehyde synthase	0.590423	0.959309	36	6	15	9
Aatf	apoptosis antagonizing transcription factor	0.123808	0.959309	255	328	172	290
Aatk	apoptosis-associated tyrosine kinase	0.336785	0.967854	54	18	20	31
Abca1	ATP-binding cassette, sub-family A (ABC1), member 1	-0.439722	0.371889	2467	1949	2331	2830
Abca13	ATP-binding cassette, sub-family A (ABC1), member 13	-0.249433	NA	5	21	13	12
Abca17	ATP-binding cassette, sub-family A (ABC1), member 17	-0.718371	0.703375	48	43	41	92
Abca2	ATP-binding cassette, sub-family A (ABC1), member 2	-0.502383	0.138435	907	912	897	1333
Abca4	ATP-binding cassette, sub-family A (ABC1), member 4	-0.646138	0.766658	147	530	389	480
Abca5	ATP-binding cassette, sub-family A (ABC1), member 5	0.137577	0.975513	139	282	157	159
Abca7	ATP-binding cassette, sub-family A (ABC1), member 7	-0.208278	0.874974	245	324	213	354
Abca8a	ATP-binding cassette, sub-family A (ABC1), member 8a	1.11649	0.770503	1219	317	265	373
Abcb10	ATP-binding cassette, sub-family B (MDR/TAP), member 10	0.0125023	0.99576	227	294	213	221
Abcb11	ATP-binding cassette, sub-family B (MDR/TAP), member 11	0.723362	NA	7	10	7	1
Abcb1a	ATP-binding cassette, sub-family B (MDR/TAP), member 1A	0.754592	0.76571	27.17	27.5	16.83	10.33
Abcb1b	ATP-binding cassette, sub-family B (MDR/TAP), member 1B	1.43782	3.24e-05	279.17	258.5	71.83	99.33
Abcb4	ATP-binding cassette, sub-family B (MDR/TAP), member 4	0.0148237	0.99576	221.67	410	229.33	297.33
Abcb6	ATP-binding cassette, sub-family B (MDR/TAP), member 6	-0.0574975	0.988702	376	394	300	386
Abcb7	ATP-binding cassette, sub-family B (MDR/TAP), member 7	0.391573	0.597117	218	325	147	205
Abcb8	ATP-binding cassette, sub-family B (MDR/TAP), member 8	0.363216	0.523533	292	379	176	272
Abcb9	ATP-binding cassette, sub-family B (MDR/TAP), member 9	0.0741846	0.99576	27	37	21	31
Abcc1	ATP-binding cassette, sub-family C (CFTR/MRP), member 1	0.388496	0.38368	868.5	986.5	516.5	697.33
Abcc10	ATP-binding cassette, sub-family C (CFTR/MRP), member 10	0.0553856	0.994973	126.5	120	86	118
Abcc3	ATP-binding cassette, sub-family C (CFTR/MRP), member 3	-0.0136541	0.99576	271	335	231	289
Abcc4	ATP-binding cassette, sub-family C (CFTR/MRP), member 4	-0.191785	0.893938	207	224	176	247
Abcc5	ATP-binding cassette, sub-family C (CFTR/MRP), member 5	0.112863	0.967826	1190.5	1178.5	795	1092
Abcc8	ATP-binding cassette, sub-family C (CFTR/MRP), member 8	0.394384	NA	8	6	5	4
Abcc9	ATP-binding cassette, sub-family C (CFTR/MRP), member 9	0.416817	0.61837	1896	2163	1111	1492
Abcd1	ATP-binding cassette, sub-family D (ALD), member 1	-0.0461078	0.990854	540	787.5	497	667
Abcd2	ATP-binding cassette, sub-family D (ALD), member 2	0.663676	0.802359	160	89	62	75
Abcd3	ATP-binding cassette, sub-family D (ALD), member 3	0.119648	0.905726	706	762	508	647
Abcd4	ATP-binding cassette, sub-family D (ALD), member 4	0.0799512	0.988702	108	127	86	103
Abce1	ATP-binding cassette, sub-family E (OABP), member 1	0.230319	0.451135	1485	1779	1021	1355
Abcf1	ATP-binding cassette, sub-family F (GCN20), member 1	-0.317533	0.340222	1121.5	1104	1031	1352
Abcf2	ATP-binding cassette, sub-family F (GCN20), member 2	0.069398	0.978137	1097.5	964	686	1023
Abcf3	ATP-binding cassette, sub-family F (GCN20), member 3	0.00643315	0.99576	823	872	625	821
Abcg1	ATP binding cassette subfamily G member 1	-0.337828	0.720845	1604	1248	1357	1765
Abcg2	ATP binding cassette subfamily G member 2 (Junior blood group)	0.0895275	0.992474	77	44	40	60
Abcg3	ATP binding cassette subfamily G member 3	-0.329273	0.619869	238.67	336.58	263.5	351
ABCG3L1	-	-0.698733	0.375803	85.78	103.11	120.33	139.67
ABCG3L2	-	-0.387415	0.435646	232.94	308.9	257.5	345.67
ABCG3L3	-	-0.188965	0.89671	364	494.92	332.5	508
ABCG3L4	-	-0.398804	0.398378	235.28	305.44	259.33	347.67
Abcg4	ATP binding cassette subfamily G member 4	0.427823	0.922853	31	31	15	25
Abhd1	abhydrolase domain containing 1	0.0869739	0.988702	130.5	125	81.5	126
Abhd10	abhydrolase domain containing 10	-0.16089	0.974359	89	77	77	81
Abhd11	abhydrolase domain containing 11	0.013527	0.99576	155	142	110	143
Abhd12	abhydrolase domain containing 12	0.179521	0.779461	1581	2204	1260	1567
Abhd13	abhydrolase domain containing 13	-0.217326	0.758979	403	411	342	472
Abhd14a	abhydrolase domain containing 14A	0.406094	0.761028	146	157	88	107
Abhd14b	abhydrolase domain containing 14b	-0.200282	0.904161	399	458	362	480
Abhd15	abhydrolase domain containing 15	-0.29291	0.963933	29	31	27	36
Abhd16a	abhydrolase domain containing 16A	-0.197672	0.777222	601	662	494	757
Abhd17a	abhydrolase domain containing 17A	-0.451629	0.104787	672	692	716	877
Abhd17b	abhydrolase domain containing 17B	0.238704	0.797767	253	282	167	221
Abhd17c	abhydrolase domain containing 17C	-0.055444	0.992474	104	143	91	128
Abhd2	abhydrolase domain containing 2	0.117997	0.974716	376	619	324	453
Abhd3	abhydrolase domain containing 3	0.341096	0.964733	28	40	22	23
Abhd4	abhydrolase domain containing 4	0.132985	0.869548	1799	2253	1369	1777
Abhd5	abhydrolase domain containing 5	0.122947	0.935129	431	520	346	393
Abhd6	abhydrolase domain containing 6	-0.100815	0.975513	338	491	346	402
Abhd8	abhydrolase domain containing 8	-0.181439	0.910158	262	270	225	292
Abi1	abl-interactor 1	-0.356723	0.431934	1033	1378	1203	1401
Abi2	abl-interactor 2	0.127808	0.920972	513	651	417	484
Abi3	ABI gene family, member 3	-0.847053	0.0572326	182.5	131.5	217	271
Abl1	c-abl oncogene 1, non-receptor tyrosine kinase	-0.0992943	0.910348	2363.5	2922.5	2016	2831.5
Abl2	v-abl Abelson murine leukemia viral oncogene 2 (arg, Abelson-related gene)	0.260257	0.949914	97	77	49	78
Ablim2	actin-binding LIM protein 2	0.389862	0.967257	107	30	45	47
Ablim3	actin binding LIM protein family, member 3	0.223384	0.938947	179	163	84	175
Abo	ABO blood group (transferase A, alpha 1-3-N-acetylgalactosaminyltransferase, transferase B, alpha 1-3-galactosyltransferase)	-0.700457	0.625507	31.5	52	56.5	58.5
Abr	active BCR-related gene	-0.0322385	0.992474	1214	1733.5	1081	1483
Abra	actin-binding Rho activating protein	0.961754	0.493494	241	90	64	87
Abracl	ABRA C-terminal like	-0.244576	0.702219	1454	2066	1605	1909
Abt1	activator of basal transcription 1	-0.103787	0.974749	243	210	192	225
Abtb1	ankyrin repeat and BTB (POZ) domain containing 1	-0.183958	0.92494	303	292	244	339
Abtb2	ankyrin repeat and BTB (POZ) domain containing 2	0.0861837	0.990854	127	97	74	110
AC1576	-	-0.412003	0.879935	36	32.22	33.1	45.08
Acaa1a	acetyl-Coenzyme A acyltransferase 1A	0.188367	0.794313	540.5	625.5	375	499.5
Acaa1b	acetyl-Coenzyme A acyltransferase 1B	0.316871	NA	7.5	12.5	4	10.5
Acaa2	acetyl-Coenzyme A acyltransferase 2 (mitochondrial 3-oxoacyl-Coenzyme A thiolase)	-0.333115	0.689015	1249	923	1018	1360
Acaca	acetyl-Coenzyme A carboxylase alpha	0.253708	0.686236	507	575.5	311	472
Acacb	acetyl-Coenzyme A carboxylase beta	0.345839	0.907468	158	76	73	88
Acad10	acyl-Coenzyme A dehydrogenase family, member 10	0.0408811	0.99576	118.5	108.5	86.5	102
Acad11	acyl-Coenzyme A dehydrogenase family, member 11	0.324711	0.783286	382.5	692	324	394
Acad9	acyl-Coenzyme A dehydrogenase family, member 9	0.0540499	0.980588	535	648	425	546
Acadl	acyl-Coenzyme A dehydrogenase, long-chain	-0.0195251	0.99576	950	1046	775	949
Acadm	acyl-Coenzyme A dehydrogenase, medium chain	0.307014	0.659387	1214	1168	692	971
Acads	acyl-Coenzyme A dehydrogenase, short chain	-0.254278	0.732374	456	563	413	633
Acadsb	acyl-Coenzyme A dehydrogenase, short/branched chain	0.462762	0.461372	194	225.5	114	146
Acadvl	acyl-Coenzyme A dehydrogenase, very long chain	-0.0647132	0.974749	1242.5	1202	934.5	1268.5
Acan	aggrecan	2.2367	0.720845	194	53	20	27
Acap1	ArfGAP with coiled-coil, ankyrin repeat and PH domains 1	-0.351462	0.749	167	228	168	265
Acap2	ArfGAP with coiled-coil, ankyrin repeat and PH domains 2	0.0799051	0.975513	793	1225	688	930
Acap3	ArfGAP with coiled-coil, ankyrin repeat and PH domains 3	0.0079505	0.99576	645	925	588	732
Acat1	acetyl-Coenzyme A acetyltransferase 1	0.215671	0.616989	1251	1366	871	1048
Acat2	acetyl-Coenzyme A acetyltransferase 2	0.492312	0.516046	112	151	69	90
Acbd3	acyl-Coenzyme A binding domain containing 3	-0.125534	0.933518	562	766	550	675.5
Acbd4	acyl-Coenzyme A binding domain containing 4	-0.0132734	0.99576	161	191	120	186
Acbd5	acyl-Coenzyme A binding domain containing 5	-0.0282897	0.99576	366.33	507.67	324	434.33
Acbd6	acyl-Coenzyme A binding domain containing 6	0.0426845	0.991227	333	316	233	309
Accs	1-aminocyclopropane-1-carboxylate synthase (non-functional)	0.22984	0.884891	153	200	116	139
Accsl	1-aminocyclopropane-1-carboxylate synthase (non-functional)-like	1.43262	NA	7	2	1	2
Acd	adrenocortical dysplasia	0.134827	0.901677	425	476	311	389
Ace	angiotensin I converting enzyme (peptidyl-dipeptidase A) 1	0.369077	0.358221	2016	3142	1450	1929
Ace2	angiotensin I converting enzyme (peptidyl-dipeptidase A) 2	-0.102533	0.99576	32	16	24	20
Acer1	alkaline ceramidase 1	-0.323515	0.97073	26	11	16	25
Acer2	alkaline ceramidase 2	0.804223	0.601146	131.5	63.25	47	50.5
Ache	acetylcholinesterase	1.37171	0.335125	217	78	41	61
Acin1	apoptotic chromatin condensation inducer 1	-0.0240152	0.993175	1403.5	1631	1109.25	1536
Ackr2	atypical chemokine receptor 2	0.305954	0.93159	136	123	69	114
Ackr3	atypical chemokine receptor 3	0.164597	0.943676	6115	4910.5	3712.5	4796
Acly	ATP citrate lyase	0.0546421	0.982525	1520	2230	1343	1710
Aco1	aconitase 1	0.205405	0.753535	1652	2319	1255	1670
Aco2	aconitase 2, mitochondrial	0.362572	0.139231	5638.65	5626.7	3325	4180.45
Acot1	acyl-CoA thioesterase 1	0.327487	0.975513	21	17.83	15	11
Acot11	acyl-CoA thioesterase 11	-0.0337234	0.99576	68.5	96.5	64	77.5
Acot13	acyl-CoA thioesterase 13	0.521881	0.744982	175	113	82	91
Acot2	acyl-CoA thioesterase 2	0.300408	0.857786	115	137.17	87	85
Acot3	acyl-CoA thioesterase 3	0.345817	0.869447	74.5	111.5	58.5	65
Acot7	acyl-CoA thioesterase 7	-0.587014	0.0352696	414	535	502	718
Acot8	acyl-CoA thioesterase 8	-0.0252126	0.99576	188	192.5	146.5	185
Acot9	acyl-CoA thioesterase 9	-0.309591	0.414645	878	1160	992	1138
Acox1	acyl-Coenzyme A oxidase 1, palmitoyl	0.23525	0.690697	575.5	658.5	379.5	518
Acox2	acyl-Coenzyme A oxidase 2, branched chain	0.520347	NA	8	5	7	0
Acox3	acyl-Coenzyme A oxidase 3, pristanoyl	0.124218	0.9243	558	739	446	564
Acoxl	acyl-Coenzyme A oxidase-like	-0.239013	NA	2	2	2	2
Acp1	acid phosphatase 1, soluble	0.205116	0.722952	1096	1309	814	954
Acp2	acid phosphatase 2, lysosomal	0.300283	0.256573	1565	1687.5	979.5	1281.5
Acp5	acid phosphatase 5, tartrate resistant	-0.0223765	0.99576	632	903	549	780
Acp6	acid phosphatase 6, lysophosphatidic	-0.0113273	0.99576	200	200	123	230
Acpp	acid phosphatase, prostate	-0.187081	0.977404	101	73	74	98
ACPT	-	-0.160805	0.990854	22	15	15	21
Acrbp	proacrosin binding protein	0.0249212	0.99576	31	24	19	28
Acsbg1	acyl-CoA synthetase bubblegum family member 1	0.606516	0.975513	63	5	20	20
Acsf2	acyl-CoA synthetase family member 2	0.0282719	0.99576	438	386	300	397
Acsl1	acyl-CoA synthetase long-chain family member 1	0.947306	0.0735052	1255	976	410	600
Acsl3	acyl-CoA synthetase long-chain family member 3	0.293989	0.738739	417	376	238	320
Acsl4	acyl-CoA synthetase long-chain family member 4	0.140165	0.921006	792	1106	656	799
Acsl5	acyl-CoA synthetase long-chain family member 5	-0.104465	0.952088	1852	2756.5	1815.5	2378
Acsl6	acyl-CoA synthetase long-chain family member 6	0.938456	0.611725	92	54	31	35
Acsm1	acyl-CoA synthetase medium-chain family member 1	0.0443573	NA	3	2	3	1
Acsm3	acyl-CoA synthetase medium-chain family member 3	-0.252639	0.971388	72	51.5	56.5	71.5
Acss1	acyl-CoA synthetase short-chain family member 1	0.149426	0.964965	221	245	135	230
Acss2	acyl-CoA synthetase short-chain family member 2	0.0318957	0.995757	503	518	387	465
Acss3	acyl-CoA synthetase short-chain family member 3	-0.238943	0.97398	115	245.5	149	209
Acta1	actin, alpha 1, skeletal muscle	0.124702	0.990854	66151	23514	30765	42647
Acta2	actin, alpha 2, smooth muscle, aorta	0.630083	0.511197	1977	2887	1165	1493
Actb	actin, beta	0.621984	0.00169301	55781	81866.5	32727	43030
Actbl2	actin, beta-like 2	0.405861	0.990854	31	1	10	12
Actc1	actin, alpha, cardiac muscle 1	-0.190831	0.992474	276	46	138	196
Actg1	actin, gamma, cytoplasmic 1	0.338701	0.145626	49200.7	66455	33450.8	44284.7
Actg2	actin, gamma 2, smooth muscle, enteric	1.39606	0.00447624	230	204	58	85
Actl6a	actin-like 6A	0.148728	0.893937	419	452.5	301.5	368
Actn1	actinin, alpha 1	0.542118	0.597117	1051	1373	609	808
Actn2	actinin alpha 2	0.371	0.888842	1934	666	770	1020
Actn3	actinin alpha 3	0.237043	0.975513	19502.5	6323	8272	11319
Actn4	actinin alpha 4	0.271404	0.754026	4068.5	5440.5	2883.5	3813.5
Actr10	ARP10 actin-related protein 10	-0.025727	0.992474	1224	1341	995	1232
Actr1a	ARP1 actin-related protein 1A, centractin alpha	-0.168731	0.644272	2630	3132	2330	3216
Actr1b	ARP1 actin-related protein 1B, centractin beta	0.120341	0.904283	1204	1256	816	1131
Actr2	ARP2 actin-related protein 2	0.2141	0.804935	2427	3882	2054	2518
Actr3	ARP3 actin-related protein 3	0.183194	0.820007	5672	8352	4684	5726
Actr3b	ARP3 actin-related protein 3B	0.261697	0.974359	45	47	16	53
Actr5	ARP5 actin-related protein 5	-0.00624111	0.996295	90	90	55	103
Actr6	ARP6 actin-related protein 6	-0.273844	0.689252	234	268	219	301
Actr8	ARP8 actin-related protein 8	-0.0729574	0.975891	323	421	277	392
Acvr1	activin A receptor, type 1	0.102239	0.975607	229	260	151	243
Acvr1b	activin A receptor, type 1B	0.27815	0.844166	261	291	155	238
Acvr1c	activin A receptor, type IC	1.4338	NA	10	19	4	5
Acvr2a	activin receptor IIA	0.0580192	0.990854	220	260	173	220
Acvr2b	activin receptor IIB	-0.109404	0.99576	14	11	7	17
Acvrl1	activin A receptor, type II-like 1	0.0180726	0.99576	1536	2183	1281	1853.5
Acy1	aminoacylase 1	-0.0293816	0.99576	519	473	351	528
Acy3	aspartoacylase (aminoacylase) 3	-0.394577	0.712444	240	192	195	301
Acyp1	acylphosphatase 1, erythrocyte (common) type	-0.000404115	0.999936	133	145	103	135
Acyp2	acylphosphatase 2, muscle type	1.29738	0.0562512	255	150	74	67
Ada	adenosine deaminase	-0.241553	0.700027	418	534	428	527
Adal	adenosine deaminase-like	-0.234994	0.945383	62	62	55	70
Adam10	a disintegrin and metallopeptidase domain 10	-0.128577	0.905291	920	1305	895	1168
Adam11	a disintegrin and metallopeptidase domain 11	0.591897	0.930624	50	15	18	20
Adam15	a disintegrin and metallopeptidase domain 15 (metargidin)	-0.405338	0.247798	2017	2454	2099	2977
Adam17	a disintegrin and metallopeptidase domain 17	-0.0737762	0.953818	1770	2327	1551	2127
Adam19	a disintegrin and metallopeptidase domain 19 (meltrin beta)	0.0824804	0.984694	2086	3562	1930	2568
Adam1a	a disintegrin and metallopeptidase domain 1a	-0.049732	0.99576	67	32	31	61
Adam23	a disintegrin and metallopeptidase domain 23	-0.320854	0.857661	180	438	277	367
Adam32	a disintegrin and metallopeptidase domain 32	-1.24783	NA	3	1	5	3
Adam4	a disintegrin and metallopeptidase domain 4	-0.367155	NA	6.5	6	7	6.5
ADAM4L1	-	0.390735	0.964139	20.5	14	12	9.5
Adam9	a disintegrin and metallopeptidase domain 9 (meltrin gamma)	0.16939	0.738327	2542	3034	1808	2430
Adamts1	a disintegrin-like and metallopeptidase (reprolysin type) with thrombospondin type 1 motif, 1	0.685638	0.0421215	677	578	275	403
Adamts10	a disintegrin-like and metallopeptidase (reprolysin type) with thrombospondin type 1 motif, 10	0.0698221	0.975513	943	886	608	903
Adamts12	a disintegrin-like and metallopeptidase (reprolysin type) with thrombospondin type 1 motif, 12	0.264255	0.22196	3946	4307	2551	3330
Adamts14	a disintegrin-like and metallopeptidase (reprolysin type) with thrombospondin type 1 motif, 14	-0.192901	0.974359	242	279	213	298
Adamts15	a disintegrin-like and metallopeptidase (reprolysin type) with thrombospondin type 1 motif, 15	-0.587236	0.145537	1262	1045	1285	1715
Adamts18	a disintegrin-like and metallopeptidase (reprolysin type) with thrombospondin type 1 motif, 18	2.51128	0.197428	67	17	2	12
Adamts19	a disintegrin-like and metallopeptidase (reprolysin type) with thrombospondin type 1 motif, 19	-0.402845	0.944667	21	22	24	24
Adamts2	a disintegrin-like and metallopeptidase (reprolysin type) with thrombospondin type 1 motif, 2	-0.0555955	0.977844	2610.5	3085.5	2086.5	2998.5
Adamts3	a disintegrin-like and metallopeptidase (reprolysin type) with thrombospondin type 1 motif, 3	0.0845935	0.99576	13	6	5	11
Adamts4	a disintegrin-like and metallopeptidase (reprolysin type) with thrombospondin type 1 motif, 4	0.126039	0.974359	118.5	135	82	117
Adamts5	a disintegrin-like and metallopeptidase (reprolysin type) with thrombospondin type 1 motif, 5 (aggrecanase-2)	-0.239303	0.927549	569	1149	703	1006
Adamts7	a disintegrin-like and metallopeptidase (reprolysin type) with thrombospondin type 1 motif, 7	0.570489	0.0758046	487	493	226	345
Adamts9	a disintegrin-like and metallopeptidase (reprolysin type) with thrombospondin type 1 motif, 9	0.871284	0.136078	471	314	157	218
Adamtsl3	ADAMTS-like 3	0.989556	0.790607	37	21	5	22
Adamtsl4	ADAMTS-like 4	0.205774	0.700114	1835	2488	1285	1927
Adamtsl5	ADAMTS-like 5	0.11283	0.967854	255	358.5	198	286
Adap1	ArfGAP with dual PH domains 1	-0.723104	0.19222	108	205	184	252.5
Adap2	ArfGAP with dual PH domains 2	0.0592386	0.991227	211	239	142	232
Adar	adenosine deaminase, RNA-specific	-0.0847109	0.982416	785	1132	720	1011
Adarb1	adenosine deaminase, RNA-specific, B1	-0.0647707	0.974359	757	906	658	822
Adat1	adenosine deaminase, tRNA-specific 1	0.422632	0.866385	60	71	38	45
Adat2	adenosine deaminase, tRNA-specific 2	-0.0218156	0.99576	44	61	46	43
Adat3	adenosine deaminase, tRNA-specific 3	0.272646	0.935129	59	71	39	53
Adck1	aarF domain containing kinase 1	-0.118791	0.98251	89	90	67	101
Adck2	aarF domain containing kinase 2	-0.0199991	0.99576	212	224	171	206.5
ADCK3	-	0.868313	0.38368	1441	537	406	559
ADCK4	-	-0.132787	0.967434	302	238	208	308
Adck5	aarF domain containing kinase 5	0.0190465	0.99576	220	223	149.5	228.5
Adcy1	adenylate cyclase 1	0.95285	NA	8	6	4	2
Adcy10	adenylate cyclase 10	-0.980035	0.769761	7	31.5	36	25
Adcy2	adenylate cyclase 2	-0.255084	0.9243	143	293	224	202
Adcy3	adenylate cyclase 3	0.0444127	0.990854	421	565	362	448
Adcy4	adenylate cyclase 4	0.0469749	0.991227	451	733	408	563
Adcy5	adenylate cyclase 5	-0.243275	0.817242	211	250	201	265
Adcy6	adenylate cyclase 6	-0.0305084	0.993678	776	903	640	823
Adcy7	adenylate cyclase 7	0.0715612	0.990854	794	1859	894	1216
Adcy8	adenylate cyclase 8	-1.84281	NA	1	0	2	1
Adcyap1r1	adenylate cyclase activating polypeptide 1 receptor 1	0.105316	0.995702	40	40	27	37
Add1	adducin 1 (alpha)	-0.191486	0.60647	3358.5	4316	3222	4238.5
Add2	adducin 2 (beta)	-0.0267075	0.99576	34	51	33	40
Add3	adducin 3 (gamma)	-0.0217616	0.99576	2719	4338	2675	3357
Adgrb2	adhesion G protein-coupled receptor B2	0.00918161	0.998062	37	17	21	26
Adgre1	adhesion G protein-coupled receptor E1	-0.377155	0.751346	1990	2418	2141	2732
Adgre5	adhesion G protein-coupled receptor E5	0.0909064	0.967252	2487	3443	2093	2618
Adgrf5	adhesion G protein-coupled receptor F5	-0.0157886	0.99576	1681	1406	1187.5	1503
Adgrg1	adhesion G protein-coupled receptor G1	0.160538	0.975513	716	379	340	530
Adgrg2	adhesion G protein-coupled receptor G2	0.125247	0.988702	99	142	79	109
Adgrg5	adhesion G protein-coupled receptor G5	-0.503035	0.733963	102	151	138	164
Adgrg7	adhesion G protein-coupled receptor G7	0.307019	NA	11	19	11	9
Adgrl1	adhesion G protein-coupled receptor L1	-0.176608	0.935129	285	412	275	397
Adgrl2	adhesion G protein-coupled receptor L2	0.647858	0.04435	510	479	227	318
Adgrl3	adhesion G protein-coupled receptor L3	-0.4555	NA	5	10	9	8
Adgrl4	adhesion G protein-coupled receptor L4	-0.111854	0.96282	1271	998	944	1172
Adh1	alcohol dehydrogenase 1 (class I)	1.42931	0.360069	56	27	12	15
Adh5	alcohol dehydrogenase 5 (class III), chi polypeptide	0.0143583	0.99576	1236	1301	904	1257
Adh6a	alcohol dehydrogenase 6A (class V)	-0.433453	0.974716	11	3	6	11
Adh7	alcohol dehydrogenase 7 (class IV), mu or sigma polypeptide	0.392403	0.800687	136	141	86	93
Adhfe1	alcohol dehydrogenase, iron containing, 1	0.416936	0.945383	63	28	26	34
Adi1	acireductone dioxygenase 1	0.100147	0.975742	168	230	143	171
Adipoq	adiponectin, C1Q and collagen domain containing	1.53027	0.633356	1395	1069	323	416
Adipor1	adiponectin receptor 1	-0.167468	0.786756	2673	2953	2283	3141
Adipor2	adiponectin receptor 2	0.0612311	0.981526	468	525	348	467
Adk	adenosine kinase	0.505675	0.132383	927	1249	530	782
Adm	adrenomedullin	0.349866	0.896205	148	374	144	198
Adm2	adrenomedullin 2	0.145547	NA	0	4	1	2
Adnp	activity-dependent neuroprotective protein	-0.183751	0.744982	1054	1197	969	1210
Adnp2	ADNP homeobox 2	0.224732	0.826278	257	318	196	220
Ado	2-aminoethanethiol (cysteamine) dioxygenase	0.284188	0.911966	59	79	39	58
Adora1	adenosine A1 receptor	1.22497	NA	14	5	4	3
Adora2a	adenosine A2a receptor	-0.393121	0.840427	112	210	142	217
Adora2b	adenosine A2b receptor	-0.441088	0.756588	114	181	156	180
Adora3	adenosine A3 receptor	-0.0617932	0.99576	19.5	33.5	19	29
Adpgk	ADP-dependent glucokinase	-0.196592	0.778334	512.5	620	444	672
Adprh	ADP-ribosylarginine hydrolase	-0.0631611	0.977268	540	561	446	535
Adprhl1	ADP-ribosylhydrolase like 1	0.571438	0.93096	49.5	13.5	18	20.5
Adprhl2	ADP-ribosylhydrolase like 2	-0.227593	0.732135	362	439	331	473
Adprm	ADP-ribose/CDP-alcohol diphosphatase, manganese dependent	0.159401	0.920651	273	346	189	287
Adra1a	adrenergic receptor, alpha 1a	0.202356	NA	12	17	11	10
Adra1b	adrenergic receptor, alpha 1b	-0.13895	NA	8	23	10	19
Adra1d	adrenergic receptor, alpha 1d	-0.34495	0.977805	5	19	12	13
Adra2a	adrenergic receptor, alpha 2a	0.480731	0.815317	112	85	54	68
Adra2b	adrenergic receptor, alpha 2b	0.851069	NA	17	6	2	10
Adrb2	adrenergic receptor, beta 2	0.461827	0.758979	174	145	83	118
Adrb3	adrenergic receptor, beta 3	-0.0250115	NA	8	10	9	6
ADRBK1	-	-0.439092	0.0548046	1088	1398	1242	1627
ADRBK2	-	0.452181	0.745403	116	248	111	108
Adrm1	adhesion regulating molecule 1	-0.345248	0.346897	637	681	578	868
Adsl	adenylosuccinate lyase	0.114501	0.961348	588	490	380	478
Adss	adenylosuccinate synthetase, non muscle	0.161473	0.828787	1332	1858	1047	1374
Adtrp	androgen dependent TFPI regulating protein	-0.0465417	0.99576	22	12	16	14
Aebp1	AE binding protein 1	0.259639	0.404428	12190	16636	8719	11767
Aebp2	AE binding protein 2	-0.410339	0.751772	94	169	126	169
Aen	apoptosis enhancing nuclease	0.228654	0.857786	259	366.5	195	258
Aes	-	-0.0597652	0.962667	3505	4025	2838	3888
Afap1	actin filament associated protein 1	0.0499056	0.99576	233	433	267	264
Afap1l1	actin filament associated protein 1-like 1	0.407728	0.750704	382	251	189	224
Afap1l2	actin filament associated protein 1-like 2	0.618103	0.543782	281.5	161	111	141
Aff1	AF4/FMR2 family, member 1	0.226047	0.825491	339	413	231	319
Aff3	AF4/FMR2 family, member 3	0.485321	0.631332	129	191	87	106
Aff4	AF4/FMR2 family, member 4	0.0585545	0.974359	1569	2071	1321.5	1640
Afg3l1	AFG3-like AAA ATPase 1	-0.277014	0.686274	403	579	413	603
Afg3l2	AFG3-like AAA ATPase 2	0.0366158	0.990854	536	604	378	581
Afmid	arylformamidase	0.172222	0.975513	60.81	54.64	31.64	58.4
Aftph	aftiphilin	0.017551	0.99576	712	959	608	795
Aga	aspartylglucosaminidase	0.182236	0.806368	1287	1652	974	1225
Agap1	ArfGAP with GTPase domain, ankyrin repeat and PH domain 1	-0.249305	0.719534	643	662	619	699
Agap2	ArfGAP with GTPase domain, ankyrin repeat and PH domain 2	-0.0107802	0.99576	86	126	63	122
Agap3	ArfGAP with GTPase domain, ankyrin repeat and PH domain 3	-0.0872578	0.949327	796	1024	687	966
Agbl5	ATP/GTP binding protein-like 5	-0.0745537	0.99576	38	48	30	48
Ager	advanced glycosylation end product-specific receptor	0.0841665	0.991227	63	64	39	65
Agfg1	ArfGAP with FG repeats 1	-0.146207	0.825491	1318	1684	1267	1549
Agfg2	ArfGAP with FG repeats 2	0.0960879	0.984694	219	251.5	194	174.5
Agk	acylglycerol kinase	0.334332	0.658746	265	320	195	195
Agl	amylo-1,6-glucosidase, 4-alpha-glucanotransferase	0.946883	0.134727	3350	1522	1022	1191
Agmat	agmatine ureohydrolase (agmatinase)	1.24736	0.714319	9	14	5	3
Agmo	alkylglycerol monooxygenase	0.864796	0.546063	160	85	62	53
Ago1	argonaute RISC catalytic subunit 1	-0.0855607	0.974079	315	386	268	368
Ago2	argonaute RISC catalytic subunit 2	0.125581	0.974359	142	189	100	161
Ago3	argonaute RISC catalytic subunit 3	0.164023	0.974716	65	73	47	58
Ago4	argonaute RISC catalytic subunit 4	-0.328376	0.867035	76	71.5	76	81.5
Agpat1	1-acylglycerol-3-phosphate O-acyltransferase 1 (lysophosphatidic acid acyltransferase, alpha)	-0.0164767	0.99576	1036.5	1191	864	1052
Agpat2	1-acylglycerol-3-phosphate O-acyltransferase 2 (lysophosphatidic acid acyltransferase, beta)	0.17445	0.962323	140	110	73	121
Agpat3	1-acylglycerol-3-phosphate O-acyltransferase 3	-0.170762	0.933518	328	335	285	353
Agpat4	1-acylglycerol-3-phosphate O-acyltransferase 4 (lysophosphatidic acid acyltransferase, delta)	0.0394101	0.990625	808	845	614	760
Agpat5	1-acylglycerol-3-phosphate O-acyltransferase 5 (lysophosphatidic acid acyltransferase, epsilon)	-0.00199589	0.998707	363	493	335	388
AGPAT6	-	0.252121	0.402734	1261	1458	820	1137
AGPAT9	-	0.0730812	0.991227	89	76	55	81
Agps	alkylglycerone phosphate synthase	0.129735	0.969124	322	550	322	341
Agr2	anterior gradient 2	1.25754	NA	10	2	0	5
Agrn	agrin	0.0335758	0.992985	1201	1519	973	1292
Agrp	agouti related neuropeptide	1.66171	NA	4	12	3	1
Agt	angiotensinogen (serpin peptidase inhibitor, clade A, member 8)	1.74744	0.0826268	584	312	109	123
Agtpbp1	ATP/GTP binding protein 1	0.238902	0.869548	630	571.5	375	504.5
Agtr1a	angiotensin II receptor, type 1a	0.311445	0.877036	1479	2124	1109	1338
Agtr2	angiotensin II receptor, type 2	1.69362	NA	25	7	3	6
Agtrap	angiotensin II, type I receptor-associated protein	-0.164107	0.874974	381	489	333	504
Agxt	alanine-glyoxylate aminotransferase	-1.80712	NA	1	6	6	15
Ahctf1	AT hook containing transcription factor 1	-0.251046	0.380161	1211.5	1468	1158	1567.5
Ahcy	S-adenosylhomocysteine hydrolase	-0.0697323	0.975891	1029	1174	832	1151
Ahcyl1	S-adenosylhomocysteine hydrolase-like 1	0.0297973	0.992474	2308	3128.5	2008	2500.5
Ahcyl2	S-adenosylhomocysteine hydrolase-like 2	0.124776	0.944165	353	454	289	337
Ahdc1	AT hook, DNA binding motif, containing 1	0.0362085	0.992985	382	494	308	421
Ahi1	Abelson helper integration site 1	0.188293	0.91704	209.5	253.75	172	170
Ahnak	AHNAK nucleoprotein (desmoyokin)	0.0414375	0.989474	30690.9	41639.9	26513.9	32957.9
Ahr	aryl-hydrocarbon receptor	-0.137061	0.922853	834	781	676	848
Ahrr	aryl-hydrocarbon receptor repressor	-2.53898	0.00451443	15	12	63	71
Ahsa1	AHA1, activator of heat shock protein ATPase 1	0.0123932	0.99576	1275	1331	973	1238
Ahsa2	AHA1, activator of heat shock protein ATPase 2	-0.212426	0.804935	462	484.5	408.5	531
AHSP	-	0.0773435	0.99576	66	64	49	56
Aida	axin interactor, dorsalization associated	0.0132986	0.99576	1911	2870	1801	2188
Aif1	allograft inflammatory factor 1	-0.26323	0.358221	2838	3720	2920	3767
Aif1l	allograft inflammatory factor 1-like	-0.353028	0.832846	315	684	474	589
Aifm1	apoptosis-inducing factor, mitochondrion-associated 1	0.0822037	0.975672	508	738	431	567
Aifm2	apoptosis-inducing factor, mitochondrion-associated 2	-0.0267813	0.99576	398	476	336.5	422
Aifm3	apoptosis-inducing factor, mitochondrion-associated 3	0.312293	0.977268	14	12	8	10
Aig1	androgen-induced 1	0.0498222	0.990854	394	593	358	447
Aimp1	aminoacyl tRNA synthetase complex-interacting multifunctional protein 1	-0.20532	0.761028	470	524	444	531
Aimp2	aminoacyl tRNA synthetase complex-interacting multifunctional protein 2	0.130473	0.918409	491	507	345	435
Aip	aryl-hydrocarbon receptor-interacting protein	0.0876964	0.955759	518	628	402.5	517
Ajuba	ajuba LIM protein	0.221423	0.935129	215	201	111	202
Ak1	adenylate kinase 1	0.867218	0.138426	1917	1080	610.5	834.5
Ak2	adenylate kinase 2	-0.182479	0.758979	717	871	651	890
Ak3	adenylate kinase 3	0.240296	0.630211	1399	1884.5	1069.07	1279
Ak4	adenylate kinase 4	0.600059	0.819742	47	82	38	32
Ak6	adenylate kinase 6	0.0371057	0.992985	409	527.83	349	425
Akap1	A kinase (PRKA) anchor protein 1	0.13568	0.93922	426	551	320	439
Akap10	A kinase (PRKA) anchor protein 10	-0.233507	0.707088	455	604	462	596
Akap11	A kinase (PRKA) anchor protein 11	0.381851	0.129832	868	1048	537	719
Akap12	A kinase (PRKA) anchor protein (gravin) 12	0.247355	0.825616	1613	1917	1121	1410
Akap13	A kinase (PRKA) anchor protein 13	0.22739	0.749576	3037	4092.5	2195	2992
Akap14	A kinase (PRKA) anchor protein 14	-1.57037	NA	2	7	11	11
AKAP17A	-	-0.107606	0.95896	480	484	387	504
Akap2	-	0.296958	0.836655	964	829.5	568	686.5
Akap3	A kinase (PRKA) anchor protein 3	-0.449019	NA	4	10	7	9
Akap5	A kinase (PRKA) anchor protein 5	1.90429	NA	6	7	1	2
Akap6	A kinase (PRKA) anchor protein 6	1.28566	0.0906188	187	97	49	52
Akap7	A kinase (PRKA) anchor protein 7	-0.344051	0.899004	50	67	56	70
Akap8	A kinase (PRKA) anchor protein 8	-0.260065	0.520307	946	958	817	1148
Akap8l	A kinase (PRKA) anchor protein 8-like	0.0598318	0.982416	415	487	304	439
Akap9	A kinase (PRKA) anchor protein (yotiao) 9	0.320698	0.482771	1044	1357	731	898
Akip1	A kinase (PRKA) interacting protein 1	-0.486552	0.385209	157.5	207.88	206	226.5
Akirin1	akirin 1	-0.0216876	0.99576	701	837	589	740
Akirin2	akirin 2	-0.00244021	0.997593	532	526	383	530
Akna	AT-hook transcription factor	-0.253497	0.603561	456	509	433	549
Aknad1	AKNA domain containing 1	-0.492517	0.847701	43	54	59	55
Akr1a1	aldo-keto reductase family 1, member A1 (aldehyde reductase)	-0.187708	0.668496	10751	12689	9732	13099.3
AKR1B1	-	-0.156741	0.777918	3279	3685	2817	3839
Akr1b10	aldo-keto reductase family 1, member B10 (aldose reductase)	-1.3695	7.74e-13	198.67	199.83	378	507
Akr1b8	aldo-keto reductase family 1, member B8	-1.57329	3.65e-44	1238.83	1523	2994.83	4024
Akr1c12	aldo-keto reductase family 1, member C12	1.58495	NA	17	4	4	2
Akr1c13	aldo-keto reductase family 1, member C13	-0.181145	NA	10	3.5	9.5	3
Akr1c14	aldo-keto reductase family 1, member C14	-0.848502	0.161516	1700	1676	2329	2873
Akr1c19	aldo-keto reductase family 1, member C19	0.148181	0.990854	152	60	81	86
AKR1C2	-	-0.862964	NA	1	1	2	1
AKR1C3	-	-0.951505	0.0906188	57	96	109	141
Akr1cl	aldo-keto reductase family 1, member C-like	-0.47112	0.896219	92	62	93	89
AKR1E2	-	-0.222209	0.949636	136	124	99	166
AKR7A2	-	-0.0995428	0.959309	773	777.5	584	852
AKR7A3	-	-1.0229	NA	4	5	5	11
Akt1	thymoma viral proto-oncogene 1	-0.0472822	0.983358	1910	2578	1623	2342
Akt1s1	AKT1 substrate 1 (proline-rich)	0.132939	0.944667	657	562	389	578
Akt2	thymoma viral proto-oncogene 2	0.0468419	0.978137	1476	1807	1144	1574
Akt3	thymoma viral proto-oncogene 3	0.00846682	0.99576	207	231	174	195
Aktip	thymoma viral proto-oncogene 1 interacting protein	0.399854	0.195341	609	700.5	374	472
Alad	aminolevulinate, delta-, dehydratase	-0.0394289	0.992423	335	396	252	396
Alas1	aminolevulinic acid synthase 1	0.310475	0.513183	636	868	440	592
Alas2	aminolevulinic acid synthase 2, erythroid	-0.182025	0.990854	931	939	812	1002
Alb	albumin	0.666937	NA	6	3	2	3
Alcam	activated leukocyte cell adhesion molecule	0.716081	0.805879	714	3007	847	996
Aldh16a1	aldehyde dehydrogenase 16 family, member A1	-0.263705	0.486336	923	1146	853	1281.5
Aldh18a1	aldehyde dehydrogenase 18 family, member A1	0.106621	0.944984	1519	2015	1189	1607
Aldh1a1	aldehyde dehydrogenase family 1, subfamily A1	0.557741	0.801497	569	184.5	196.5	260.5
Aldh1a2	aldehyde dehydrogenase family 1, subfamily A2	0.309342	0.976911	26	23	19	14
Aldh1a3	aldehyde dehydrogenase family 1, subfamily A3	-0.52101	0.832846	110	536	335	421
Aldh1a7	aldehyde dehydrogenase family 1, subfamily A7	0.0463626	NA	1	3.5	1.5	1.5
Aldh1l1	aldehyde dehydrogenase 1 family, member L1	-0.0914566	0.99576	72	28	41	53
Aldh1l2	aldehyde dehydrogenase 1 family, member L2	-0.0165605	0.99576	1477	2188	1363	1775
Aldh2	aldehyde dehydrogenase 2, mitochondrial	-0.410837	0.0313616	1721	1865	1715	2382
Aldh3a1	aldehyde dehydrogenase family 3, subfamily A1	-0.393229	0.62805	226	215	204	297
Aldh3a2	aldehyde dehydrogenase family 3, subfamily A2	-0.154353	0.883833	738	1052	741	946
Aldh3b1	aldehyde dehydrogenase 3 family, member B1	-0.628905	0.147524	270	294	286	471
Aldh4a1	aldehyde dehydrogenase 4 family, member A1	-0.120321	0.964724	284	254	213	292
Aldh5a1	aldhehyde dehydrogenase family 5, subfamily A1	0.239101	0.943676	127	86	71	85
Aldh6a1	aldehyde dehydrogenase family 6, subfamily A1	0.451145	0.365245	785	711	417.5	522.5
Aldh7a1	aldehyde dehydrogenase family 7, member A1	0.198095	0.699843	1140	1400	798	1095
Aldh8a1	aldehyde dehydrogenase 8 family, member A1	0.346251	NA	17	21	13	12
Aldh9a1	aldehyde dehydrogenase 9, subfamily A1	0.0849771	0.959309	1195	1690.17	979.67	1333
Aldoa	aldolase A, fructose-bisphosphate	0.129428	0.964965	37581.5	23338.5	20931.5	27773
Aldoc	aldolase C, fructose-bisphosphate	0.143359	0.974359	96	155	88	103
Alg1	asparagine-linked glycosylation 1 (beta-1,4-mannosyltransferase)	0.0948739	0.975513	223.5	229.5	167.5	194.5
ALG10	-	-0.0209929	0.99576	180	214	137	207
Alg11	asparagine-linked glycosylation 11 (alpha-1,2-mannosyltransferase)	-0.0145775	0.99576	275	279	208	272
Alg12	asparagine-linked glycosylation 12 (alpha-1,6-mannosyltransferase)	0.400304	0.560966	207	233	128	156
Alg13	asparagine-linked glycosylation 13	0.104726	0.974716	234	242	186	188
Alg14	asparagine-linked glycosylation 14	0.112073	0.968891	501	504	332	470
Alg2	asparagine-linked glycosylation 2 (alpha-1,3-mannosyltransferase)	0.123611	0.943676	409	500	329	377
Alg3	asparagine-linked glycosylation 3 (alpha-1,3-mannosyltransferase)	-0.0790055	0.974359	336	428	303	383
Alg5	asparagine-linked glycosylation 5 (dolichyl-phosphate beta-glucosyltransferase)	-0.0480167	0.987495	846	1153	745	1015
Alg6	asparagine-linked glycosylation 6 (alpha-1,3,-glucosyltransferase)	0.0598309	0.990854	251	365	210	293
Alg8	asparagine-linked glycosylation 8 (alpha-1,3-glucosyltransferase)	0.205347	0.899387	204.5	255	160	176
Alg9	asparagine-linked glycosylation 9 (alpha 1,2 mannosyltransferase)	0.0149183	0.99576	292	337	238	292
Alk	anaplastic lymphoma kinase	1.66654	NA	5	6	1	2
Alkbh1	alkB homolog 1, histone H2A dioxygenase	0.0180968	0.99576	221	352.5	194.5	288
Alkbh2	alkB homolog 2, alpha-ketoglutarate-dependent dioxygenase	-0.112301	0.988702	63	69	45	79
Alkbh3	alkB homolog 3, alpha-ketoglutarate-dependent dioxygenase	-0.274133	0.689015	588	606	530	710
Alkbh4	alkB homolog 4, lysine demethylase	0.359806	0.866802	80	68	45	54
Alkbh5	alkB homolog 5, RNA demethylase	-0.039873	0.99576	181	231	159	201
Alkbh6	alkB homolog 6	0.0936371	0.982525	178	157	107	165.67
Alkbh7	alkB homolog 7	-0.090816	0.977989	212	314.5	220.5	251
Alkbh8	alkB homolog 8, tRNA methyltransferase	-0.299435	0.943676	49	54	33	79
Alms1	ALMS1, centrosome and basal body associated	-0.0293282	0.99576	395	492	351	415.5
Alox12	arachidonate 12-lipoxygenase	0.247436	0.94999	69	156	67	92
Alox12e	arachidonate lipoxygenase, epidermal	-0.367276	NA	7	14	9	14
Alox15	arachidonate 15-lipoxygenase	-0.0313659	0.99576	356	813	408	596
ALOX15B	-	-3.22542	NA	1	1	7	9
Alox5	arachidonate 5-lipoxygenase	0.0812886	0.974359	1021	1157	765	994
Alox5ap	arachidonate 5-lipoxygenase activating protein	-0.181568	0.912241	786	1328	875	1146
Aloxe3	arachidonate lipoxygenase 3	-0.2781	0.97944	14	9	16	7
Alpk3	alpha-kinase 3	-0.15457	0.987804	450	126	248	325
Alpl	alkaline phosphatase, liver/bone/kidney	1.28705	0.307653	56	37	15	18
Als2	alsin Rho guanine nucleotide exchange factor	0.106682	0.974042	246	364	220	257
Als2cr12	-	0.286247	NA	7	16	6	10
Alx3	aristaless-like homeobox 3	-0.988375	NA	2	6	7	6
Alx4	aristaless-like homeobox 4	-0.00412829	NA	3	3	3	2
Alyref	Aly/REF export factor	-0.0250225	0.99576	581	649	516	540
Amacr	alpha-methylacyl-CoA racemase	0.319041	0.732374	210	212	118	174
Ambra1	autophagy/beclin 1 regulator 1	-0.201044	0.803504	373	497	382	465
Amd1	S-adenosylmethionine decarboxylase 1	0.247494	0.559198	1306	1403	858	1093
Amdhd2	amidohydrolase domain containing 2	-0.480683	0.0701454	739	749	738	1053
Amer1	APC membrane recruitment 1	0.125173	0.98024	89	111	73	82
Amh	anti-Mullerian hormone	0.274452	NA	12	20	11	11
Amhr2	anti-Mullerian hormone type 2 receptor	0.938887	NA	7	10	1	7
Amigo1	adhesion molecule with Ig like domain 1	-0.383565	0.946997	26	20	26	25
Amigo2	adhesion molecule with Ig like domain 2	0.290766	0.883038	192	151.5	109.5	132
Amigo3	adhesion molecule with Ig like domain 3	-0.0469873	0.99576	84	104	70	96
Ammecr1l	AMME chromosomal region gene 1-like	-0.106412	0.94773	466	565	439	500
Amn1	antagonist of mitotic exit network 1	-0.327028	0.759401	124	158	136	164
Amotl2	angiomotin-like 2	0.435621	0.218301	1182	1075	621	817
Ampd1	adenosine monophosphate deaminase 1	0.962655	0.638093	3715	1159	983	1243
Ampd2	adenosine monophosphate deaminase 2	0.208521	0.70831	664	793	447	634
Ampd3	adenosine monophosphate deaminase 3	-0.477742	0.432068	204	159	193	243
Amph	amphiphysin	0.297999	0.878609	132	152	79	120
Amt	aminomethyltransferase	-0.0773592	0.992985	60	56	38.5	69
Amz1	archaelysin family metallopeptidase 1	-0.278206	0.719159	206	250	191	283.5
Amz2	archaelysin family metallopeptidase 2	-0.098436	0.953483	488	537	395	547
Anapc1	anaphase promoting complex subunit 1	0.122079	0.932998	988	1496	859	1066
Anapc10	anaphase promoting complex subunit 10	-0.000326946	0.999936	174	189	142	167
Anapc11	anaphase promoting complex subunit 11	0.0118096	0.99576	1050	1229	843.5	1084
Anapc13	anaphase promoting complex subunit 13	0.27325	0.616864	504.5	529.5	322.5	409.5
Anapc15	anaphase promoting complex C subunit 15	-0.394283	0.349247	466.5	539	472	661
Anapc2	anaphase promoting complex subunit 2	0.14891	0.86307	1340	1828	1006	1434
Anapc4	anaphase promoting complex subunit 4	-0.0655606	0.971539	849	1044	720	972
Anapc5	anaphase-promoting complex subunit 5	-0.100925	0.879755	4459	4824	3717	4800
Anapc7	anaphase promoting complex subunit 7	0.0619277	0.987464	282	357	200	328
Ang	angiogenin, ribonuclease, RNase A family, 5	0.31038	0.850583	145.25	223	98	156.5
Angel1	angel homolog 1	-0.376016	0.726256	141	167	122	226
Angel2	angel homolog 2	-0.0389854	0.990854	568.8	694.53	488.64	615.65
Angpt1	angiopoietin 1	0.646642	0.263272	206	202	92	133
Angpt2	angiopoietin 2	0.713462	0.0668242	574.5	494	240	323
Angpt4	angiopoietin 4	-0.186256	0.963569	543	1269	715	1013
Angptl1	angiopoietin-like 1	0.766382	0.287837	1831.5	991.5	653	797
Angptl2	angiopoietin-like 2	0.548899	0.265662	4294	3952	2037	2839
Angptl4	angiopoietin-like 4	-1.14013	0.0878237	351	486	658	914
Angptl6	angiopoietin-like 6	-0.131916	0.990854	28	44	20.5	49
Ank1	ankyrin 1, erythroid	0.828514	0.569229	250	101	68	109
Ank3	ankyrin 3, epithelial	0.562215	0.515046	417	414	221	259
Ankef1	ankyrin repeat and EF-hand domain containing 1	0.0352438	0.99576	27	28	20	26
Ankfy1	ankyrin repeat and FYVE domain containing 1	-0.0952239	0.952898	1782	2495	1726	2136
ANKH	-	0.42901	0.174075	822	1021	511	654
Ankhd1	ankyrin repeat and KH domain containing 1	0.0982509	0.945383	867	1198	720	915
Ankib1	ankyrin repeat and IBR domain containing 1	-0.112978	0.959309	384	574	375	504
Ankle2	ankyrin repeat and LEM domain containing 2	-0.0630379	0.988702	287.5	391	253	351.5
Ankmy2	ankyrin repeat and MYND domain containing 2	-0.230333	0.758979	603	700.5	571	733
Ankra2	ankyrin repeat, family A (RFXANK-like), 2	-0.0538106	0.990625	272	343	239	304
Ankrd1	ankyrin repeat domain 1 (cardiac muscle)	0.0294838	0.99576	144	9	50	90
Ankrd10	ankyrin repeat domain 10	0.0551554	0.987464	407	455	286	429
Ankrd12	ankyrin repeat domain 12	0.15472	0.880059	891	1250.5	700.5	934
Ankrd13a	ankyrin repeat domain 13a	0.022781	0.993175	2346	2996	1973	2493
Ankrd13c	ankyrin repeat domain 13c	-0.190271	0.825491	552	617.5	464	686
Ankrd13d	ankyrin repeat domain 13 family, member D	-0.2158	0.946997	87	96	78	104
Ankrd16	ankyrin repeat domain 16	0.19061	0.974359	40	66	32	47
Ankrd17	ankyrin repeat domain 17	-0.0424678	0.982528	1397.5	1732	1208	1534.5
Ankrd2	ankyrin repeat domain 2 (stretch responsive muscle)	1.04796	0.737765	59	21	16	18
Ankrd22	ankyrin repeat domain 22	1.9323	0.686028	15	5	0	5
Ankrd23	ankyrin repeat domain 23	1.34303	0.00819621	2037	950	434	609
Ankrd24	ankyrin repeat domain 24	0.00483987	0.995787	281.5	306.5	216	285.5
Ankrd27	ankyrin repeat domain 27 (VPS9 domain)	-0.021188	0.99576	659	774.5	525	720.5
Ankrd29	ankyrin repeat domain 29	-0.154136	0.952088	247	409	250	371
ANKRD32	-	-0.388472	0.541096	172	196	173	240
Ankrd33b	ankyrin repeat domain 33B	-0.502756	0.758327	59	48	64	65
Ankrd34a	ankyrin repeat domain 34A	0.596028	NA	13	6	5	6
Ankrd34c	ankyrin repeat domain 34C	1.32964	0.756588	6	176	25	33
Ankrd37	ankyrin repeat domain 37	0.0436541	0.99576	37	143	65	78
Ankrd39	ankyrin repeat domain 39	0.830848	0.498564	47.12	56.7	20.75	29
Ankrd40	ankyrin repeat domain 40	-0.0385339	0.986899	1086	1251	887	1164
Ankrd42	ankyrin repeat domain 42	-0.178018	0.959309	77	126	85	109
Ankrd44	ankyrin repeat domain 44	-0.132263	0.952088	396	661	432	543
Ankrd46	ankyrin repeat domain 46	-0.118379	0.917293	632	672	512	704
Ankrd49	ankyrin repeat domain 49	0.0971533	0.967854	448	495	335	417
Ankrd50	ankyrin repeat domain 50	-0.00858676	0.99576	272	329	205	316
Ankrd52	ankyrin repeat domain 52	-0.0665904	0.990854	303	358	245	349
Ankrd54	ankyrin repeat domain 54	-0.000161362	0.999936	138	163	99	161
Ankrd55	ankyrin repeat domain 55	-0.417462	0.928503	54	37	55	48
Ankrd6	ankyrin repeat domain 6	-0.00590554	0.99663	72	89	59	79
Ankrd61	ankyrin repeat domain 61	-0.0834387	NA	14	4	3	15
Ankrd9	ankyrin repeat domain 9	0.518828	0.799802	176	96	73	93
ANKS1A	-	-0.239278	0.739286	549	512	443	641
Anks1b	ankyrin repeat and sterile alpha motif domain containing 1B	2.04133	0.469517	11	29	4	4
Anks3	ankyrin repeat and sterile alpha motif domain containing 3	0.324719	0.631332	245	282	158	201
Anks4b	ankyrin repeat and sterile alpha motif domain containing 4B	1.62163	NA	6	5	2	1
Anks6	ankyrin repeat and sterile alpha motif domain containing 6	-0.223392	0.921154	101	141	92	151
Ankzf1	ankyrin repeat and zinc finger domain containing 1	0.154778	0.836655	1080	1208.5	721	1047.5
Ano1	anoctamin 1, calcium activated chloride channel	0.423248	0.874974	140	98	53	105
Ano4	anoctamin 4	-0.893859	NA	5	4	8	6
Ano6	anoctamin 6	-0.0567951	0.986466	1999	3031	1956.5	2457.5
Anp32a	acidic (leucine-rich) nuclear phosphoprotein 32 family, member A	-0.0739528	0.975513	1274	1747	1143	1565
Anp32b	acidic (leucine-rich) nuclear phosphoprotein 32 family, member B	-0.0994217	0.943822	1317	1886	1299	1599
Anp32e	acidic (leucine-rich) nuclear phosphoprotein 32 family, member E	0.116716	0.9286	595	713	432	601
Anpep	alanyl (membrane) aminopeptidase	0.0498147	0.990854	11123	20298	10749	14851
Antxr1	anthrax toxin receptor 1	-0.140925	0.904283	1309	1788	1335	1541
Anxa1	annexin A1	-0.11533	0.93159	12553	15831	11363	14809
Anxa10	annexin A10	0.697054	NA	13.17	9	4	8.5
Anxa11	annexin A11	-0.140494	0.887534	2196	2990	2098	2758
Anxa2	annexin A2	-0.126684	0.91632	19559	23869	17093	23459
Anxa3	annexin A3	-0.201387	0.86307	758	1246	850	1092
Anxa4	annexin A4	-0.233283	0.38947	5739	7506	5753	7482
Anxa5	annexin A5	0.341722	0.472279	12747	12257	7161	9868
Anxa6	annexin A6	0.130081	0.868127	6574	8365	4966	6675
Anxa7	annexin A7	-0.197103	0.744982	2317	3311	2310	3178
Anxa8	annexin A8	0.578145	0.964724	336	231	142	189
Aoah	acyloxyacyl hydrolase	-0.616661	0.22637	212	321	293	401
AOC2-PS1	-	0.372199	0.94999	44	48	14	50.5
Aoc3	amine oxidase, copper containing 3	0.512323	0.567915	3045	2223	1384	1825.5
Aox1	aldehyde oxidase 1	-0.0130445	0.99576	703	627	511	643
Aox2	aldehyde oxidase 2	0.172861	0.991227	14	12	8	12
Aox3	aldehyde oxidase 3	1.12404	0.380832	507	301	171	144
Aox4	aldehyde oxidase 4	-0.331066	0.990187	8	3	6	6
Ap1ar	adaptor-related protein complex 1 associated regulatory protein	-0.269382	0.636094	296	341	288	367
Ap1b1	adaptor protein complex AP-1, beta 1 subunit	-0.114539	0.923543	1980	2286	1697	2252
Ap1g1	adaptor protein complex AP-1, gamma 1 subunit	0.128628	0.94042	712	1146	640	790
Ap1m1	adaptor-related protein complex AP-1, mu subunit 1	-0.114482	0.899387	1167	1338	966	1362
Ap1m2	adaptor protein complex AP-1, mu 2 subunit	-1.12398	0.818023	27	5	29	33
Ap1s1	adaptor protein complex AP-1, sigma 1	-0.298584	0.246023	911	1065	893	1184
Ap1s2	adaptor-related protein complex 1, sigma 2 subunit	-0.253806	0.733963	1196	1447	1176	1508
Ap1s3	adaptor-related protein complex AP-1, sigma 3	0.0870297	0.990854	69	102	53	85
Ap2a1	adaptor-related protein complex 2, alpha 1 subunit	-0.317519	0.489891	690	894	699	989
Ap2a2	adaptor-related protein complex 2, alpha 2 subunit	-0.293115	0.513183	3181	4266.5	3360	4392.5
Ap2b1	adaptor-related protein complex 2, beta 1 subunit	-0.0571801	0.984696	2399	3867	2432	3056
Ap2m1	adaptor-related protein complex 2, mu 1 subunit	-0.328794	0.0609547	6505	7182	6202	8559
Ap2s1	adaptor-related protein complex 2, sigma 1 subunit	-0.188513	0.732374	1988	1919	1633	2202
Ap3b1	adaptor-related protein complex 3, beta 1 subunit	-0.168291	0.850094	1091	1555.5	1113.5	1402.5
Ap3d1	adaptor-related protein complex 3, delta 1 subunit	-0.185266	0.622604	1810	2295	1730	2242
Ap3m1	adaptor-related protein complex 3, mu 1 subunit	-0.232354	0.692651	1077	1459	1106	1422
Ap3m2	adaptor-related protein complex 3, mu 2 subunit	0.262363	0.905726	125	193	91	135
Ap3s1	adaptor-related protein complex 3, sigma 1 subunit	-0.374747	0.417223	512	782	653	756
Ap3s2	adaptor-related protein complex 3, sigma 2 subunit	-0.0241823	0.99576	538	532	381	560
Ap4b1	adaptor-related protein complex AP-4, beta 1	-0.0683267	0.979498	318	367	276	335
Ap4e1	adaptor-related protein complex AP-4, epsilon 1	0.159953	0.950107	194	267	150	201
Ap4m1	adaptor-related protein complex AP-4, mu 1	-0.143371	0.952088	165.5	235	167	208
Ap4s1	adaptor-related protein complex AP-4, sigma 1	0.0145286	0.99576	243	253	162	264
Ap5b1	adaptor-related protein complex 5, beta 1 subunit	-0.0931192	0.974359	368.03	334.92	288.75	353.83
Ap5m1	adaptor-related protein complex 5, mu 1 subunit	0.0105936	0.99576	299	400	275	310
Ap5s1	adaptor-related protein 5 complex, sigma 1 subunit	-0.032752	0.99576	62	90	57	75
Ap5z1	adaptor-related protein complex 5, zeta 1 subunit	-0.196472	0.857586	275	387	264	384
Apaf1	apoptotic peptidase activating factor 1	-0.00756198	0.99576	601	952	579	738.08
Apba1	amyloid beta (A4) precursor protein binding, family A, member 1	-0.321076	0.78065	189	314	239	289
Apba2	amyloid beta (A4) precursor protein-binding, family A, member 2	3.06361	NA	31	15	1	4
Apba3	amyloid beta (A4) precursor protein-binding, family A, member 3	-0.13958	0.942416	438.5	495	357.5	527
Apbb1	amyloid beta (A4) precursor protein-binding, family B, member 1	0.0957879	0.980588	261	310	194	263
Apbb1ip	amyloid beta (A4) precursor protein-binding, family B, member 1 interacting protein	-0.324605	0.689015	751	1385	1046	1180
Apbb3	amyloid beta (A4) precursor protein-binding, family B, member 3	0.0678958	0.990854	253	254	173	244
Apc	APC, WNT signaling pathway regulator	0.067384	0.979498	830	909	620	799
Apc2	APC regulator of WNT signaling pathway 2	-0.0204416	0.99576	146.5	144	123	125.5
APEG3	-	0.899293	0.22191	129.5	117.5	55.5	57
Apeh	acylpeptide hydrolase	0.0961008	0.935647	759	910	582	749
Apex1	apurinic/apyrimidinic endonuclease 1	-0.137713	0.922853	668	714	509	809
Apex2	apurinic/apyrimidinic endonuclease 2	-0.273974	0.829558	131	140	128	151
Aph1a	aph1 homolog A, gamma secretase subunit	-0.284955	0.443719	1338	1766	1412	1798
Aph1b	aph1 homolog B, gamma secretase subunit	-0.202519	0.761028	1555.42	2006.58	1536	1944.42
Api5	apoptosis inhibitor 5	-0.0832077	0.923752	2124	2567	1862	2369
Apip	APAF1 interacting protein	-0.138214	0.967854	136	145	114	151
APITD1	-	0.125802	0.975513	96	107	65	95
Aplf	aprataxin and PNKP like factor	-0.150485	0.905194	294	338	249	353
Apln	apelin	0.123443	0.988702	92	252	115	147
Aplnr	apelin receptor	-0.250418	0.893128	408	309	338	396
Aplp1	amyloid beta (A4) precursor-like protein 1	0.213181	0.974359	295	191	150	218
Aplp2	amyloid beta (A4) precursor-like protein 2	0.277138	0.241713	5761	7477	4044	5243
Apmap	adipocyte plasma membrane associated protein	0.0430279	0.990625	479	591	385	500
Apoa1	apolipoprotein A-I	0.292606	NA	3	10	3	6
APOA1BP	-	-0.199385	0.804935	440	470	368	532
Apoa5	apolipoprotein A-V	-0.790673	NA	1	1	1	2
Apobec1	apolipoprotein B mRNA editing enzyme, catalytic polypeptide 1	-0.776626	0.000608702	777	835	1081	1267
Apobec2	apolipoprotein B mRNA editing enzyme, catalytic polypeptide 2	1.01925	0.0889604	2502	1285	697	950
APOBEC3B	-	0.583751	0.541652	104	125	67	61
Apobr	apolipoprotein B receptor	-0.41907	0.477061	195	219	210	262
Apoc1	apolipoprotein C-I	1.14945	0.0198866	210.5	204	71	89
Apoc2	apolipoprotein C-II	2.88434	NA	3	0	0	0
Apoc3	apolipoprotein C-III	0.703146	0.949598	4	18	1	11
Apoc4	apolipoprotein C-IV	2.1409	NA	24.5	2	4	1
Apod	apolipoprotein D	1.02299	0.247377	589	225	144	214
Apoe	apolipoprotein E	-0.19623	0.836655	133529	125290	106597	149935
APOL3	-	-0.190319	0.83062	444.5	484	386.5	521.5
Apol9a	apolipoprotein L 9a	-0.545451	0.566773	689	1223	971	1391
Apold1	apolipoprotein L domain containing 1	0.27325	0.962294	230	217	152	162
Apom	apolipoprotein M	-0.925304	NA	5	6	7	11
Apoo	apolipoprotein O	0.297576	0.818023	217	182	126	153
Apool	apolipoprotein O-like	-0.116428	0.953483	295	331	268	308
Apopt1	apoptogenic, mitochondrial 1	-0.25341	0.771536	342	419	344	427
App	amyloid beta (A4) precursor protein	0.350746	0.360252	9488	14879	6748	9471
Appbp2	amyloid beta precursor protein (cytoplasmic tail) binding protein 2	-0.0319586	0.992474	962	1411	913	1136
Appl2	adaptor protein, phosphotyrosine interaction, PH domain and leucine zipper containing 2	-0.0175887	0.99576	598	668	468	630
Aprt	adenine phosphoribosyl transferase	0.13411	0.879935	2803	3350	1940	2884
APTR	-	-0.831355	0.825491	7	15	14	19
Aptx	aprataxin	0.133939	0.974359	128	124	78	121
Aqp1	aquaporin 1	0.0629117	0.994672	4296	2355	2404	3187
Aqp11	aquaporin 11	-0.364218	NA	5	8	7	7
Aqp3	aquaporin 3	0.194047	0.99576	44	9	17	25
Aqp4	aquaporin 4	1.87467	0.297621	206	24	28	28
Aqp5	aquaporin 5	0.635334	NA	0	2	1	0
Aqp7	aquaporin 7	1.20154	0.822299	21	58	7	23
Aqp9	aquaporin 9	-1.30152	0.575768	8	8	18	15
Aqr	aquarius	0.270541	0.640575	697	1017	519	686
Ar	androgen receptor	-0.117237	0.986466	135	273	161	210
Araf	Araf proto-oncogene, serine/threonine kinase	0.0195628	0.99576	917	1013	662	979
Arap2	ArfGAP with RhoGAP domain, ankyrin repeat and PH domain 2	-0.169188	0.964792	74	77	74	69
Arc	activity regulated cytoskeletal-associated protein	0.225379	0.955759	71	94	44	78
Arcn1	archain 1	0.122129	0.921006	4326	6399	3751	4549
Areg	amphiregulin	-0.364798	0.984753	11	2	2	14
Arel1	apoptosis resistant E3 ubiquitin protein ligase 1	0.0553329	0.975891	676	808	523	697
Arf1	ADP-ribosylation factor 1	0.141025	0.799802	4282	5668	3297.5	4380
Arf2	ADP-ribosylation factor 2	0.223757	0.831121	749	996	551	719
Arf3	ADP-ribosylation factor 3	-0.472364	0.00636214	2137	2657	2495	3160
Arf4	ADP-ribosylation factor 4	0.283491	0.430123	7848	11085.5	5884.5	7254.5
Arf5	ADP-ribosylation factor 5	-0.221481	0.534529	2300	2648	2014	2951
Arf6	ADP-ribosylation factor 6	-0.319743	0.247798	853	979	838	1118
Arfgap1	ADP-ribosylation factor GTPase activating protein 1	-0.0987241	0.945383	914	1093	804	1027
Arfgap2	ADP-ribosylation factor GTPase activating protein 2	0.117361	0.930108	1252	1149	798	1116
Arfgap3	ADP-ribosylation factor GTPase activating protein 3	0.297212	0.424308	1215	1512	805	1090
Arfgef1	ADP-ribosylation factor guanine nucleotide-exchange factor 1(brefeldin A-inhibited)	-0.0619534	0.978137	864	1274	818	1073
Arfgef2	ADP-ribosylation factor guanine nucleotide-exchange factor 2 (brefeldin A-inhibited)	0.136544	0.939343	613	961	567	631
Arfip1	ADP-ribosylation factor interacting protein 1	0.0712227	0.979145	585	868	495	680
Arfip2	ADP-ribosylation factor interacting protein 2	0.0694429	0.979498	802.5	833.5	509	848
Arfrp1	ADP-ribosylation factor related protein 1	0.0110742	0.99576	349	388	269	357
Arg1	arginase, liver	-1.14647	0.278149	219	623	700	835
Arg2	arginase type II	1.15583	0.546063	29	39	11	15
Arglu1	arginine and glutamate rich 1	-0.487473	0.0997767	563	655	619	843
Arhgap1	Rho GTPase activating protein 1	0.235231	0.596914	1766	2412	1266	1760
Arhgap10	Rho GTPase activating protein 10	-0.0274407	0.99576	392	664	396	511
Arhgap11a	Rho GTPase activating protein 11A	-0.206434	0.870791	364	587	440	476
Arhgap12	Rho GTPase activating protein 12	-0.39452	0.356186	407	561	471	609
Arhgap15	Rho GTPase activating protein 15	-0.0952324	0.978137	239	348	247	280
Arhgap17	Rho GTPase activating protein 17	0.0527184	0.979645	1214	1618	988	1338
Arhgap18	Rho GTPase activating protein 18	-0.245489	0.611023	1239	1591	1272	1573
Arhgap20	Rho GTPase activating protein 20	0.0269774	0.99576	92	128	77	107
Arhgap21	Rho GTPase activating protein 21	0.157672	0.869548	873	1153	660	887
Arhgap22	Rho GTPase activating protein 22	-0.764806	0.00636214	294	449	441.5	633
Arhgap24	Rho GTPase activating protein 24	-0.194158	0.825491	273	318	248	330
Arhgap25	Rho GTPase activating protein 25	0.200916	0.938893	471	1128	483	682
Arhgap26	Rho GTPase activating protein 26	0.29878	0.912428	72	152	61	93
Arhgap27	Rho GTPase activating protein 27	-0.18942	0.928503	205	227	184	237
Arhgap28	Rho GTPase activating protein 28	0.483211	0.478433	293	289	157	200
Arhgap29	Rho GTPase activating protein 29	0.123477	0.899387	955.5	1152	714	937
Arhgap30	Rho GTPase activating protein 30	-0.339894	0.375803	897	1317	1029	1345
Arhgap31	Rho GTPase activating protein 31	-0.178336	0.871407	437	517	390	534
Arhgap35	Rho GTPase activating protein 35	-0.188938	0.727056	803	1045	764	1032
Arhgap39	Rho GTPase activating protein 39	0.0243583	0.99576	174	165	122	165
Arhgap4	Rho GTPase activating protein 4	0.0219563	0.99576	484	575	332	573
Arhgap5	Rho GTPase activating protein 5	-0.132054	0.952088	324	485	350	394
Arhgap8	Rho GTPase activating protein 8	-0.512383	0.92494	21	29	21	41
Arhgap9	Rho GTPase activating protein 9	-0.45488	0.441068	708.5	1271.5	956.5	1337
Arhgdia	Rho GDP dissociation inhibitor (GDI) alpha	-0.25905	0.225186	10958	13494	10339	14744
Arhgdib	Rho, GDP dissociation inhibitor (GDI) beta	-0.0794923	0.975607	3357	4027	2863	3799
Arhgef1	Rho guanine nucleotide exchange factor (GEF) 1	-0.178379	0.825491	1418	1682	1230	1784
Arhgef11	Rho guanine nucleotide exchange factor (GEF) 11	0.125866	0.933014	717.5	879	508.5	749
Arhgef12	Rho guanine nucleotide exchange factor (GEF) 12	-0.184146	0.832846	645	770	664	687.5
Arhgef15	Rho guanine nucleotide exchange factor (GEF) 15	-0.130763	0.975891	152	111	99	153
Arhgef16	Rho guanine nucleotide exchange factor (GEF) 16	0.244092	0.969859	50	48	27	45
Arhgef18	rho/rac guanine nucleotide exchange factor (GEF) 18	0.117105	0.964139	296	346	194	318
Arhgef19	Rho guanine nucleotide exchange factor (GEF) 19	0.0876335	0.995281	111	134	84	113
Arhgef2	rho/rac guanine nucleotide exchange factor (GEF) 2	-0.123585	0.87078	1185	1367	1047	1323
Arhgef25	Rho guanine nucleotide exchange factor (GEF) 25	0.240578	0.698806	863.5	1018	585	776
Arhgef28	Rho guanine nucleotide exchange factor (GEF) 28	-0.220966	0.919991	103	132	94	141
Arhgef3	Rho guanine nucleotide exchange factor (GEF) 3	-0.0355541	0.990854	1291	1736	1126	1515
Arhgef37	Rho guanine nucleotide exchange factor (GEF) 37	0.519644	0.892111	78	39	22	52
Arhgef39	Rho guanine nucleotide exchange factor (GEF) 39	0.0243725	0.99576	110	114	65	128
Arhgef40	Rho guanine nucleotide exchange factor (GEF) 40	0.266415	0.758979	829	972	562.5	714.5
Arhgef6	Rac/Cdc42 guanine nucleotide exchange factor (GEF) 6	0.200293	0.87078	466	750	398	493
Arhgef7	Rho guanine nucleotide exchange factor (GEF7)	0.227654	0.732478	1156	1042	716	897
Arhgef9	CDC42 guanine nucleotide exchange factor (GEF) 9	0.751913	0.637177	72	66.33	37	32.17
Arid1a	AT rich interactive domain 1A (SWI-like)	-0.119439	0.917374	1192	1420	1043	1380
Arid3a	AT rich interactive domain 3A (BRIGHT-like)	-0.155299	0.974359	118	112	81	143
Arid3b	AT rich interactive domain 3B (BRIGHT-like)	0.223276	0.955759	79	99	56	74
Arid4a	AT rich interactive domain 4A (RBP1-like)	0.131068	0.955759	371	626	336	431
Arid4b	AT rich interactive domain 4B (RBP1-like)	-0.00253831	0.997101	557	637	447	574
Arid5a	AT rich interactive domain 5A (MRF1-like)	-0.508857	0.288031	327	285	299	459
Arid5b	AT rich interactive domain 5B (MRF1-like)	-0.0868325	0.974359	287	340	252	315
Arih1	ariadne RBR E3 ubiquitin protein ligase 1	-0.168903	0.739535	1022	1233	953	1205
Arih2	ariadne RBR E3 ubiquitin protein ligase 2	-0.044508	0.986696	743	865	626	787
Arl1	ADP-ribosylation factor-like 1	0.138405	0.91153	1375	2106	1105	1586
Arl10	ADP-ribosylation factor-like 10	0.451429	0.920972	27	40	16	26
Arl11	ADP-ribosylation factor-like 11	-0.788157	6.5e-06	1187	1552	1694	2344
Arl13a	ADP-ribosylation factor-like 13A	0.263114	NA	4	5	0	7
Arl13b	ADP-ribosylation factor-like 13B	-0.158334	0.950575	269	254	228.5	271
Arl14ep	ADP-ribosylation factor-like 14 effector protein	0.0379918	0.993175	293	303	210	289
Arl2	ADP-ribosylation factor-like 2	-0.218521	0.857786	293	294	284	294
Arl2bp	ADP-ribosylation factor-like 2 binding protein	0.029411	0.990854	1529	1942	1278	1611
Arl3	ADP-ribosylation factor-like 3	-0.0246017	0.995702	665	783	569	682
Arl4a	ADP-ribosylation factor-like 4A	-0.0897521	0.979498	355	292	250	347
Arl4c	ADP-ribosylation factor-like 4C	-0.091118	0.975891	700	890	641	796
Arl4d	ADP-ribosylation factor-like 4D	-0.00912352	0.99576	75	185	99	118
Arl5a	ADP-ribosylation factor-like 5A	0.074798	0.98024	250	306	208	239
Arl5b	ADP-ribosylation factor-like 5B	0.18084	0.905726	236	290	170	226
Arl5c	ADP-ribosylation factor-like 5C	0.0539581	0.993175	100.5	101.5	76.5	89.5
Arl6	ADP-ribosylation factor-like 6	0.330972	0.886295	117	154	69	117
Arl6ip1	ADP-ribosylation factor-like 6 interacting protein 1	-0.198158	0.905194	1424	1946	1520	1732
Arl6ip4	ADP-ribosylation factor-like 6 interacting protein 4	-0.545565	0.0529674	363	417	394	585.5
Arl6ip5	ADP-ribosylation factor-like 6 interacting protein 5	-0.0427467	0.990854	1129	1706	1065	1408
Arl6ip6	ADP-ribosylation factor-like 6 interacting protein 6	0.059609	0.990854	195	255	153	216
Arl8a	ADP-ribosylation factor-like 8A	-0.0568893	0.975513	1187	1558	1009	1432.5
Arl8b	ADP-ribosylation factor-like 8B	-0.21811	0.560966	1814	2324	1805	2283
Armc1	armadillo repeat containing 1	0.114691	0.933014	458	545	345	445
Armc10	armadillo repeat containing 10	0.134021	0.899387	530	668	403	527
Armc3	armadillo repeat containing 3	-0.87486	0.814909	18	60	59	57
Armc5	armadillo repeat containing 5	0.0533651	0.990187	410	488	322	416
Armc6	armadillo repeat containing 6	-0.00382967	0.998427	106	163	100.5	128.5
Armc7	armadillo repeat containing 7	0.234696	0.9155	101	120.5	62	100.5
Armc8	armadillo repeat containing 8	0.299079	0.561968	500	609	355	408
Armc9	armadillo repeat containing 9	-0.0632676	0.982611	313	384	261	362
Armcx1	armadillo repeat containing, X-linked 1	-0.0547705	0.988702	379	525	336	464
Armcx2	armadillo repeat containing, X-linked 2	0.0483794	0.990854	347	504	294	406
Armcx3	armadillo repeat containing, X-linked 3	0.296274	0.336498	1201	1519	815	1072
Armcx6	armadillo repeat containing, X-linked 6	0.11372	0.97881	166	211	120	179
Armt1	acidic residue methyltransferase 1	-0.0400218	0.992474	264	300	205	293
Arnt	aryl hydrocarbon receptor nuclear translocator	0.205967	0.808644	680	901	453	727
Arnt2	aryl hydrocarbon receptor nuclear translocator 2	-0.266699	0.93922	31	74	41	66
Arntl	aryl hydrocarbon receptor nuclear translocator-like	0.464068	0.663855	116	168	70	106
Arntl2	aryl hydrocarbon receptor nuclear translocator-like 2	-0.375763	0.927679	32	47.5	41.5	45
Arpc1a	actin related protein 2/3 complex, subunit 1A	-0.120469	0.857204	1642	2078	1515	1922
Arpc1b	actin related protein 2/3 complex, subunit 1B	-0.114047	0.874974	7339	9921	6808	9078
Arpc2	actin related protein 2/3 complex, subunit 2	-0.118012	0.825491	6452	8285	5936	7661
Arpc3	actin related protein 2/3 complex, subunit 3	-0.182741	0.660364	3459	4514	3337	4359
Arpc4	actin related protein 2/3 complex, subunit 4	-0.105988	0.904161	2578	3188	2331	2945
Arpc5	actin related protein 2/3 complex, subunit 5	-0.262015	0.339425	3651	4801	3651	4992.5
Arpc5l	actin related protein 2/3 complex, subunit 5-like	-0.211012	0.720084	563	715	559.5	696
Arpin	actin-related protein 2/3 complex inhibitor	-0.39706	0.587268	253	300	264	359
Arpp19	cAMP-regulated phosphoprotein 19	0.141879	0.897959	605	747	495	538
Arpp21	cyclic AMP-regulated phosphoprotein, 21	1.0443	0.675953	72	28	22	20
Arr3	arrestin 3, retinal	-0.141282	NA	10	8	8	9
Arrb1	arrestin, beta 1	0.122866	0.949327	353	493.5	280	382.5
Arrb2	arrestin, beta 2	-0.398028	0.188953	683.5	744	650	973.5
Arrdc1	arrestin domain containing 1	-0.298732	0.365245	658	829	650	915
Arrdc2	arrestin domain containing 2	-0.0056229	0.995847	164	196	139	168
Arrdc3	arrestin domain containing 3	-0.501512	0.415362	263	489	399	493
Arrdc4	arrestin domain containing 4	-0.285782	0.845515	115	188	144	166
Arsa	arylsulfatase A	0.199818	0.825491	481	494	296	437
Arsb	arylsulfatase B	-0.0345784	0.994912	1398.5	1779	1197	1574
ARSE	-	0.266597	0.663108	448	494	294	375
Arsg	arylsulfatase G	-0.371267	0.836655	66	86	82	83
Arsi	arylsulfatase i	-0.162851	0.977052	154	364	185	306
Arsj	arylsulfatase J	0.0818451	0.991358	68	74	49	66
Arsk	arylsulfatase K	0.288481	0.787655	186	204	115	159
Art1	ADP-ribosyltransferase 1	0.420354	0.917374	305.5	91.5	109	158
Art2b	ADP-ribosyltransferase 2b	0.11597	NA	3	6	3	4
Art3	ADP-ribosyltransferase 3	-0.212513	0.935129	1742	2128	1604	2235
Art4	ADP-ribosyltransferase 4	-0.456231	0.969124	16	4	16	7
Art5	ADP-ribosyltransferase 5	0.709141	0.847701	100.5	23.5	29	39
Artn	artemin	0.807184	0.825491	19	13	6	10
Arv1	ARV1 homolog, fatty acid homeostasis modulator	-0.00219365	0.99895	77	88	53	90
Arvcf	armadillo repeat gene deleted in velocardiofacial syndrome	0.307785	0.825491	210	187	117	160
Arx	aristaless related homeobox	0.734969	NA	16	6	8	3
As3mt	arsenic (+3 oxidation state) methyltransferase	-0.080158	0.975513	307	330	236	344
Asah1	N-acylsphingosine amidohydrolase 1	-0.304886	0.375803	2458	3558	2788	3491
Asah2	N-acylsphingosine amidohydrolase 2	0.0957492	0.988702	95	97	67	87
Asap1	ArfGAP with SH3 domain, ankyrin repeat and PH domain1	0.0141201	0.99576	634	944	568	757
Asb1	ankyrin repeat and SOCS box-containing 1	-0.199325	0.976911	60	30	45	44
Asb10	ankyrin repeat and SOCS box-containing 10	1.56792	0.520501	80	16	13	16
Asb11	ankyrin repeat and SOCS box-containing 11	1.34573	0.321129	291	77	58	71
Asb12	ankyrin repeat and SOCS box-containing 12	0.751875	0.703266	185	71	64	69
Asb13	ankyrin repeat and SOCS box-containing 13	0.177497	0.959309	118	145	79	121
Asb14	ankyrin repeat and SOCS box-containing 14	0.590942	0.815317	89	48	33	47
Asb16	ankyrin repeat and SOCS box-containing 16	0.974751	0.759217	87	26	12	42
Asb2	ankyrin repeat and SOCS box-containing 2	0.500184	0.892383	192	55	59.5	97.5
Asb3	ankyrin repeat and SOCS box-containing 3	0.050952	0.990854	203	253	155	222
Asb5	ankyrin repeat and SOCs box-containing 5	1.13253	0.265545	227	137	63	82
Asb6	ankyrin repeat and SOCS box-containing 6	-0.00809683	0.99576	300.5	335	229	319
Asb7	ankyrin repeat and SOCS box-containing 7	0.0126086	0.99576	42	74	38	60
Asb8	ankyrin repeat and SOCS box-containing 8	0.0278655	0.994672	777	787.5	538	788
Ascc1	activating signal cointegrator 1 complex subunit 1	0.0165006	0.99576	578	692	454	620
Ascc2	activating signal cointegrator 1 complex subunit 2	-0.18697	0.909575	340	507	356	460
Ascc3	activating signal cointegrator 1 complex subunit 3	0.120474	0.974359	683	1175	616	826
Ascl3	achaete-scute family bHLH transcription factor 3	-1.01027	NA	4	3	6	5.5
Asf1a	anti-silencing function 1A histone chaperone	0.175881	0.920972	211	226	157	171
Asf1b	anti-silencing function 1B histone chaperone	0.0199863	0.99576	134	212	120	170
Asgr2	asialoglycoprotein receptor 2	-0.349261	0.659054	560	856	661	865
Ash1l	ASH1 like histone lysine methyltransferase	0.144671	0.880059	1202	1660.5	955	1242
Ash2l	ASH2 like histone lysine methyltransferase complex subunit	0.0198335	0.99576	634	814	545	666
Asic1	acid-sensing (proton-gated) ion channel 1	-1.85029	NA	1	7	13	10
Asic2	acid-sensing (proton-gated) ion channel 2	-1.82053	NA	2	0	0	7
Asic4	acid-sensing (proton-gated) ion channel family member 4	0.518642	NA	3	10	1	7
Asl	argininosuccinate lyase	-0.0863154	0.963933	617	801	519	772
ASMTL	-	-0.33761	0.416727	355	390	335	474.5
Asna1	arsA arsenite transporter, ATP-binding, homolog 1 (bacterial)	-0.0749234	0.969057	982	1112	755	1148
Asns	asparagine synthetase	-0.248371	0.778634	258	325	248	344
Asnsd1	asparagine synthetase domain containing 1	0.233852	0.659054	943	959	636	742
Aspa	aspartoacylase	0.13961	0.975891	212	271	166	206
Aspg	asparaginase	0.425942	0.975891	28	5	6	17
Asphd2	aspartate beta-hydroxylase domain containing 2	-2.68426	NA	0	0	1	1
Aspm	abnormal spindle microtubule assembly	-0.0268132	0.99576	172	319	189	230
Aspn	asporin	-0.263467	0.712214	6239	5757	5531.67	6820.33
Asrgl1	asparaginase like 1	0.281101	0.910348	144	136	75	126
Ass1	argininosuccinate synthetase 1	-0.91889	0.326382	152	166	205	315
Aste1	asteroid homolog 1	-0.308019	0.921006	49.5	69	43	85
Astn1	astrotactin 1	0.24944	0.982416	18	28	9	25
Astn2	astrotactin 2	0.540652	0.933189	21	132	35.5	50
ASUN	-	-0.111671	0.945395	394	445	324	454
Atad1	ATPase family, AAA domain containing 1	0.168922	0.758979	1100	1268	796	999
Atad2	ATPase family, AAA domain containing 2	0.149914	0.920651	579	867	494	605
Atad2b	ATPase family, AAA domain containing 2B	0.210485	0.945383	73	102	58	70
Atad3a	ATPase family, AAA domain containing 3A	0.343153	0.510292	366	441	226	319
Atat1	alpha tubulin acetyltransferase 1	-0.00817161	0.99576	91.5	101	56.5	114
Atcay	ataxia, cerebellar, Cayman type	1.59989	NA	6	9	3	1
Ate1	arginyltransferase 1	0.0430514	0.990854	661	744.5	562	588
Atf1	activating transcription factor 1	0.225311	0.681353	727	859	461	708
Atf2	activating transcription factor 2	0.038323	0.992985	436	584	367	477
Atf3	activating transcription factor 3	-0.345731	0.866385	696.5	1863.33	1113	1603.5
Atf4	activating transcription factor 4	-0.358152	0.0453716	2952	3502	2956	4135
Atf5	activating transcription factor 5	0.00475405	0.99576	1284	1786	1117	1482
Atf6	activating transcription factor 6	-0.0355974	0.993678	620	931	624	710
Atf6b	activating transcription factor 6 beta	-0.261326	0.515046	900	1120	873	1196
Atf7	activating transcription factor 7	0.0809588	0.986393	249	367	223	268
Atg10	autophagy related 10	0.176953	0.955759	137	137	86	123
Atg101	autophagy related 101	-0.0564141	0.989474	443	448	297	511
Atg12	autophagy related 12	0.0432887	0.989087	648	730	504	637
Atg13	autophagy related 13	0.106646	0.951473	494	677	411	510
Atg14	autophagy related 14	0.0407898	0.99576	172.5	189	115	189
Atg16l1	autophagy related 16-like 1 (S. cerevisiae)	0.0617126	0.982525	611	563	398	576
Atg16l2	autophagy related 16-like 2 (S. cerevisiae)	-0.160032	0.948007	130	156	121	151
Atg2a	autophagy related 2A	-0.145006	0.909474	529	520.5	432	564
Atg3	autophagy related 3	-0.0923962	0.93922	759	967	664	907
ATG4AL1	-	0.0369427	0.992474	382	400.5	272	384
Atg4b	autophagy related 4B, cysteine peptidase	0.123398	0.913252	566	592	387	526
Atg4c	autophagy related 4C, cysteine peptidase	-0.430077	0.32575	264	388	311	437
Atg4d	autophagy related 4D, cysteine peptidase	-0.141454	0.929277	387.5	367	295	425
Atg5	autophagy related 5	0.0355819	0.990854	545	658	408	600
Atg7	autophagy related 7	-0.00306131	0.997436	279	364	235	314
Atg9a	autophagy related 9A	0.0951504	0.961076	1238	1188	818	1143
Atg9b	autophagy related 9B	0.0705928	0.99576	85	21	40	50
Atic	5-aminoimidazole-4-carboxamide ribonucleotide formyltransferase/IMP cyclohydrolase	-0.043924	0.977404	1660	1930	1330	1842.5
Atl1	atlastin GTPase 1	-0.155566	0.981916	47	59	38	64
Atl2	atlastin GTPase 2	-0.0684997	0.982416	694	588	477	691
Atl3	atlastin GTPase 3	0.240691	0.81292	835	1209	669	787
Atm	ataxia telangiectasia mutated	-0.0556892	0.975513	986	1146	840	1047
Atmin	ATM interactor	0.031104	0.99576	314	324	241	292
Atn1	atrophin 1	-0.301815	0.546063	686	884	714	933
Atoh8	atonal bHLH transcription factor 8	0.351608	0.937795	55	45	28	40
Atox1	antioxidant 1 copper chaperone	-0.0412045	0.987264	1500	1793	1184	1727
Atp10a	ATPase, class V, type 10A	0.625265	0.335839	455	422	203	289
Atp11a	ATPase, class VI, type 11A	0.0386169	0.995456	1236	1484	972	1289
Atp12a	ATPase, H+/K+ transporting, nongastric, alpha polypeptide	4.12101	0.223588	35	1	0	2
Atp13a1	ATPase type 13A1	-0.00786209	0.99576	1005	1274	835	1119
Atp13a2	ATPase type 13A2	-0.449862	0.492242	966	734	889	1119
Atp13a3	ATPase type 13A3	0.530888	0.874974	35	62	31	24
Atp13a4	ATPase type 13A4	-2.22766	0.246092	15	5	45	35
Atp1a1	ATPase, Na+/K+ transporting, alpha 1 polypeptide	-0.113591	0.974359	4573	9738	5563	7393
Atp1a2	ATPase, Na+/K+ transporting, alpha 2 polypeptide	0.573092	0.888306	2578.5	749.5	870.5	1128
Atp1a3	ATPase, Na+/K+ transporting, alpha 3 polypeptide	-0.0390412	0.99576	593	4315	1730	2370
Atp1a4	ATPase, Na+/K+ transporting, alpha 4 polypeptide	0.476159	NA	7.5	3.5	5.5	1
Atp1b1	ATPase, Na+/K+ transporting, beta 1 polypeptide	0.672487	0.40887	2429.5	6832.5	2133.5	2666.5
Atp1b2	ATPase, Na+/K+ transporting, beta 2 polypeptide	0.533645	0.752016	873	353	337	409
Atp1b3	ATPase, Na+/K+ transporting, beta 3 polypeptide	0.274591	0.465634	3350	4861	2521	3221
Atp1b4	ATPase, (Na+)/K+ transporting, beta 4 polypeptide	0.962422	0.758827	42	16	17	8
Atp2a1	ATPase, Ca++ transporting, cardiac muscle, fast twitch 1	0.752878	0.809573	42889	10973	12098.5	16660
Atp2a2	ATPase, Ca++ transporting, cardiac muscle, slow twitch 2	0.141	0.899387	4126	4053	2741	3639
Atp2a3	ATPase, Ca++ transporting, ubiquitous	-0.183476	0.790607	613	650	516	717
Atp2b1	ATPase, Ca++ transporting, plasma membrane 1	-0.0881926	0.973748	1704	2677	1675	2269
Atp2b3	ATPase, Ca++ transporting, plasma membrane 3	0.83818	0.896	49	11	17	12
Atp2b4	ATPase, Ca++ transporting, plasma membrane 4	0.138417	0.988702	327	415	258	313
Atp2c1	ATPase, Ca++-sequestering	0.0328073	0.990854	1315	1532	1032	1344.5
Atp2c2	ATPase, Ca++ transporting, type 2C, member 2	-1.39007	0.832846	8	1	6	16
Atp4a	ATPase, H+/K+ exchanging, gastric, alpha polypeptide	1.07254	NA	2	3	1	1
Atp5a1	ATP synthase, H+ transporting, mitochondrial F1 complex, alpha subunit 1	0.331482	0.0713369	8811	9371	5248	7168
Atp5b	ATP synthase, H+ transporting mitochondrial F1 complex, beta subunit	0.299216	0.0589089	12814	14679	8332	10741
Atp5c1	ATP synthase, H+ transporting, mitochondrial F1 complex, gamma polypeptide 1	0.231098	0.625938	3137	3216	2030	2608
Atp5d	ATP synthase, H+ transporting, mitochondrial F1 complex, delta subunit	-0.187495	0.686028	2079	2096	1700	2401
Atp5e	ATP synthase, H+ transporting, mitochondrial F1 complex, epsilon subunit	-0.135634	0.929194	3485	3275	2752	3645
Atp5f1	-	0.210113	0.601444	3003	3544	2116	2708
Atp5g1	ATP synthase, H+ transporting, mitochondrial F0 complex, subunit C1 (subunit 9)	0.096018	0.951357	1371	1341	945	1235
Atp5g2	ATP synthase, H+ transporting, mitochondrial F0 complex, subunit C2 (subunit 9)	-0.180469	0.819796	4575	4315	3816	4835
Atp5g3	ATP synthase, H+ transporting, mitochondrial F0 complex, subunit C3 (subunit 9)	0.142891	0.888306	2894	2969	2047	2486
Atp5h	ATP synthase, H+ transporting, mitochondrial F0 complex, subunit D	0.0102919	0.99576	2837	2879	2158	2698
ATP5I	-	0.293853	0.515046	1141	1081	700	852
Atp5j	ATP synthase, H+ transporting, mitochondrial F0 complex, subunit F	0.102853	0.933189	1935.33	2287.33	1563	1760.5
Atp5j2	ATP synthase, H+ transporting, mitochondrial F0 complex, subunit F2	-0.265124	0.622643	3435	3181	3118	3681
Atp5l	ATP synthase, H+ transporting, mitochondrial F0 complex, subunit G	-0.449003	0.15903	3633	3723	3749	4861
Atp5o	ATP synthase, H+ transporting, mitochondrial F1 complex, O subunit	-0.211963	0.759413	3058	2834	2595	3266
Atp5s	-	0.0302611	0.99576	114	87	75	95
ATP5SL	-	-0.0864064	0.964965	680	762	575	732
Atp6ap1	ATPase, H+ transporting, lysosomal accessory protein 1	0.0751329	0.938947	3868	4843	3039	4008
Atp6ap2	ATPase, H+ transporting, lysosomal accessory protein 2	-0.0272719	0.99576	1064	1851	1062	1446
Atp6v0a1	ATPase, H+ transporting, lysosomal V0 subunit A1	-0.208477	0.575768	1358.5	1630.5	1330	1599.5
Atp6v0a2	ATPase, H+ transporting, lysosomal V0 subunit A2	-0.0517089	0.990854	330	492	327	391
Atp6v0a4	ATPase, H+ transporting, lysosomal V0 subunit A4	0.206492	0.987464	19	16	12	14
Atp6v0b	ATPase, H+ transporting, lysosomal V0 subunit B	-0.462268	0.465634	1436	1781	1483	2341
Atp6v0c	ATPase, H+ transporting, lysosomal V0 subunit C	0.023589	0.99576	6852	10178	6069	8135
Atp6v0d1	ATPase, H+ transporting, lysosomal V0 subunit D1	0.141213	0.844166	3756	4796	2821	3791
Atp6v0d2	ATPase, H+ transporting, lysosomal V0 subunit D2	0.820707	0.874277	187	1212	283	359
ATP6V0E1	-	-0.234816	0.757087	2216	2986	2237	2968
Atp6v0e2	ATPase, H+ transporting, lysosomal V0 subunit E2	0.248419	0.868127	191	176	106	162
Atp6v1a	ATPase, H+ transporting, lysosomal V1 subunit A	-0.037864	0.990854	2440	3611	2257	3009
Atp6v1b1	ATPase, H+ transporting, lysosomal V1 subunit B1	-0.0401176	NA	2	10	5	5
Atp6v1b2	ATPase, H+ transporting, lysosomal V1 subunit B2	-0.299157	0.712444	3445	5770	4223	5307
Atp6v1c1	ATPase, H+ transporting, lysosomal V1 subunit C1	-0.245799	0.744982	1214	1687	1272	1645
Atp6v1c2	ATPase, H+ transporting, lysosomal V1 subunit C2	0.405946	0.955661	31	13	9	21
Atp6v1d	ATPase, H+ transporting, lysosomal V1 subunit D	-0.187405	0.857786	1819	2253	1747	2193
Atp6v1e1	ATPase, H+ transporting, lysosomal V1 subunit E1	-0.0106638	0.99576	1698	2200	1478	1853
Atp6v1e2	ATPase, H+ transporting, lysosomal V1 subunit E2	-0.726152	0.899387	13	11	8	28
Atp6v1f	ATPase, H+ transporting, lysosomal V1 subunit F	-0.109902	0.947006	1311	1545	1093	1552
Atp6v1g1	ATPase, H+ transporting, lysosomal V1 subunit G1	-0.452155	0.119641	4266	4454	4524	5675
Atp6v1h	ATPase, H+ transporting, lysosomal V1 subunit H	-0.0207037	0.99576	1028	1617	991	1273.5
Atp7a	ATPase, Cu++ transporting, alpha polypeptide	0.0982314	0.978137	471	726	439	498
Atp7b	ATPase, Cu++ transporting, beta polypeptide	1.07736	NA	8	2	3	1
Atp8b1	ATPase, class I, type 8B, member 1	0.204604	0.857018	415	467	285	369
Atp8b2	ATPase, class I, type 8B, member 2	0.171444	0.875496	1714	2634.5	1390	1882.5
Atp9b	ATPase, class II, type 9B	-0.0787272	0.959309	831	923	677	910
Atpaf1	ATP synthase mitochondrial F1 complex assembly factor 1	-0.212918	0.896219	175.5	191	158	206
Atpaf2	ATP synthase mitochondrial F1 complex assembly factor 2	0.300895	0.732861	292	320	161	270
Atpif1	ATPase inhibitory factor 1	-0.00695416	0.99576	1833	2020	1475	1826
Atraid	all-trans retinoic acid induced differentiation factor	0.0402774	0.990854	603	703.5	449	642
Atrip	ATR interacting protein	0.11612	0.974359	172.5	179	105.5	175
Atrn	attractin	0.175975	0.70378	1480	1716	1041	1377
Atxn1	ataxin 1	-0.104832	0.990625	131	128	101	139
Atxn10	ataxin 10	0.108958	0.901202	1652	2207	1329	1709
Atxn2l	ataxin 2-like	-0.00684445	0.99576	1104	1317	857	1231
Atxn3	ataxin 3	0.00456246	0.99576	354	389	296	332
Atxn7l3b	ataxin 7-like 3B	0.121316	0.874527	1063	1225	764	1037
Auh	AU RNA binding protein/enoyl-coenzyme A hydratase	0.177064	0.901677	242	273	157.5	234
Aup1	ancient ubiquitous protein 1	-0.179073	0.749576	1450	1673	1276	1754
Aurka	aurora kinase A	0.0539704	0.990854	178	213	128	196
Aurkaip1	aurora kinase A interacting protein 1	0.0355033	0.992984	953	1186	815	950
Aurkb	aurora kinase B	0.115126	0.975513	223	430	242	258
Aurkc	aurora kinase C	-0.449234	0.824932	51	48	55	60
Aven	apoptosis, caspase activation inhibitor	-0.264849	0.847701	148	145.5	120	185.5
Avil	advillin	-0.356073	0.9243	48	32	42	46
Avpi1	arginine vasopressin-induced 1	0.106315	0.963241	703	613	430	632
Avpr1a	arginine vasopressin receptor 1A	0.887316	0.339874	160	180	80	74
Avpr2	arginine vasopressin receptor 2	-0.642944	NA	3	4	1	9
Awat1	acyl-CoA wax alcohol acyltransferase 1	-1.99341	0.342616	6	3	14	17
Awat2	acyl-CoA wax alcohol acyltransferase 2	-0.946465	0.707648	11	10	14	21
Axin2	axin 2	0.150006	0.980588	75	69	47	65
Axl	AXL receptor tyrosine kinase	0.25411	0.825491	4018	7800	3565	4755
Azi2	5-azacytidine induced gene 2	-0.0471954	0.98829	570	734	508	636
Azin1	antizyme inhibitor 1	0.307665	0.336498	1391	1857	1010	1208
Azin2	antizyme inhibitor 2	-0.104095	0.993678	26	27	16	34
B2m	beta-2 microglobulin	-0.110587	0.945383	47084	75881	48822	63121
B3galnt1	UDP-GalNAc:betaGlcNAc beta 1,3-galactosaminyltransferase, polypeptide 1	-0.103283	0.929194	1227	1501	1063	1441
B3galnt2	UDP-GalNAc:betaGlcNAc beta 1,3-galactosaminyltransferase, polypeptide 2	-0.10542	0.955759	619.5	598.5	474.5	655.5
B3galt1	UDP-Gal:betaGlcNAc beta 1,3-galactosyltransferase, polypeptide 1	-0.382372	NA	7	5	8	5
B3galt4	UDP-Gal:betaGlcNAc beta 1,3-galactosyltransferase, polypeptide 4	-0.530469	0.703266	63	62	63	93
B3galt5	UDP-Gal:betaGlcNAc beta 1,3-galactosyltransferase, polypeptide 5	0.318701	NA	2	4	2	2
B3galt6	UDP-Gal:betaGal beta 1,3-galactosyltransferase, polypeptide 6	0.394748	0.715213	140.5	206	89	135.5
B3gat3	beta-1,3-glucuronyltransferase 3 (glucuronosyltransferase I)	-0.228014	0.612101	897	1052	816	1141
B3GNT1	-	0.319525	0.637177	359	360	212	283
B3gnt2	UDP-GlcNAc:betaGal beta-1,3-N-acetylglucosaminyltransferase 2	0.271948	0.686262	665	631	371	560
B3gnt5	UDP-GlcNAc:betaGal beta-1,3-N-acetylglucosaminyltransferase 5	-0.854958	0.792423	24	12	32	23
B3gnt7	UDP-GlcNAc:betaGal beta-1,3-N-acetylglucosaminyltransferase 7	-0.348499	0.847701	182	210	186	240
B3gnt8	UDP-GlcNAc:betaGal beta-1,3-N-acetylglucosaminyltransferase 8	0.327743	0.975513	33	15	17	16
B3gntl1	UDP-GlcNAc:betaGal beta-1,3-N-acetylglucosaminyltransferase-like 1	-0.0231922	0.99576	56	68	36	74
B4galnt1	beta-1,4-N-acetyl-galactosaminyl transferase 1	-0.466275	0.539578	127	139	130.5	185.5
B4galnt3	beta-1,4-N-acetyl-galactosaminyl transferase 3	-0.952029	NA	3	1	2	5
B4galnt4	beta-1,4-N-acetyl-galactosaminyl transferase 4	-0.234176	0.990854	24	6	19	11
B4galt1	UDP-Gal:betaGlcNAc beta 1,4- galactosyltransferase, polypeptide 1	0.282009	0.437308	1418	1932	1042	1290
B4galt2	UDP-Gal:betaGlcNAc beta 1,4- galactosyltransferase, polypeptide 2	-0.440519	0.245231	354	376	362	488
B4galt3	UDP-Gal:betaGlcNAc beta 1,4-galactosyltransferase, polypeptide 3	-0.272594	0.671243	275	328	276	344
B4galt4	UDP-Gal:betaGlcNAc beta 1,4-galactosyltransferase, polypeptide 4	0.29305	0.831602	279	263	174	204
B4galt5	UDP-Gal:betaGlcNAc beta 1,4-galactosyltransferase, polypeptide 5	-0.284552	0.33127	1033	1295	1049	1366
B4galt6	UDP-Gal:betaGlcNAc beta 1,4-galactosyltransferase, polypeptide 6	-0.249914	0.671322	747	728	663	841
B4galt7	xylosylprotein beta1,4-galactosyltransferase, polypeptide 7 (galactosyltransferase I)	0.497014	0.196748	503	477	259	338
B9d1	B9 protein domain 1	-0.138165	0.944165	234	250	198	258
B9d2	B9 protein domain 2	-0.107492	0.980588	136	151	101	167
Baalc	brain and acute leukemia, cytoplasmic	0.673236	0.899004	45	20	19	16
Babam1	BRISC and BRCA1 A complex member 1	-0.250502	0.56421	612	734	589	778
Bace1	beta-site APP cleaving enzyme 1	0.469659	0.380161	340	332	176	242
Bace2	beta-site APP-cleaving enzyme 2	0.402601	0.576623	416	344	214	283
Bach1	BTB and CNC homology 1, basic leucine zipper transcription factor 1	-0.00366483	0.996295	475.5	594.5	395.83	518
Bad	BCL2-associated agonist of cell death	-0.132516	0.906348	512	567	415	603
Bag1	BCL2-associated athanogene 1	-0.10882	0.892383	1418	1757	1291	1619
Bag2	BCL2-associated athanogene 2	0.0847354	0.983896	213	232	160	198
Bag3	BCL2-associated athanogene 3	-0.484885	0.0889604	538	535	569	717
Bag4	BCL2-associated athanogene 4	0.394489	0.76107	145.5	252.5	107.5	147.5
Bag5	BCL2-associated athanogene 5	0.0991083	0.964139	482	581	369	477
Bag6	BCL2-associated athanogene 6	-0.231388	0.654925	1316.5	1492	1183	1646.5
BAI1	-	1.9758	NA	15	12	2	4
Baiap2	brain-specific angiogenesis inhibitor 1-associated protein 2	-0.000474581	0.999836	635	697.17	488.5	654.17
Baiap2l1	BAI1-associated protein 2-like 1	-0.21148	0.964792	46	65	48	61
Baiap2l2	BAI1-associated protein 2-like 2	-0.543779	0.773163	37	31	30	57
Bak1	BCL2-antagonist/killer 1	-0.685771	0.00286556	876	1281	1204	1757
Bambi	BMP and activin membrane-bound inhibitor	-0.222679	0.971539	158	77	87	159
Banf1	BAF nuclear assembly factor 1	0.260833	0.523207	1578	1653.5	1040	1261
Bank1	B cell scaffold protein with ankyrin repeats 1	-0.142474	0.991586	14	39	24	24
Banp	BTG3 associated nuclear protein	0.0254111	0.99576	209	328	176	275
Bap1	Brca1 associated protein 1	-0.160251	0.753535	1236	1395	1041	1486
Bard1	BRCA1 associated RING domain 1	0.749441	0.630211	46	106	27	50
Basp1	brain abundant, membrane attached signal protein 1	0.256585	0.923283	282	499	246	302
Batf	basic leucine zipper transcription factor, ATF-like	-0.273052	0.905992	93	100	93	105
Batf3	basic leucine zipper transcription factor, ATF-like 3	-0.219605	0.974716	50	72	43	80
Bax	BCL2-associated X protein	-0.0526643	0.98618	614	667	479	662
Baz1a	bromodomain adjacent to zinc finger domain 1A	-0.293814	0.469835	531	636	550	665
Baz1b	bromodomain adjacent to zinc finger domain, 1B	0.0133277	0.99576	1487	1958	1215	1700
Baz2a	bromodomain adjacent to zinc finger domain, 2A	-0.198376	0.874527	646	717	545	803
Baz2b	bromodomain adjacent to zinc finger domain, 2B	0.0729868	0.977477	481	572.5	364	492
Bbc3	BCL2 binding component 3	0.247595	0.967434	37	65	25	49
Bbox1	butyrobetaine (gamma), 2-oxoglutarate dioxygenase 1 (gamma-butyrobetaine hydroxylase)	0.765184	NA	7	1	3	1
Bbs1	Bardet-Biedl syndrome 1 (human)	0.388924	0.574198	215	243	121	180
Bbs10	Bardet-Biedl syndrome 10 (human)	-0.0567508	0.994973	121	110	77	133
Bbs2	Bardet-Biedl syndrome 2 (human)	0.121387	0.945395	282	355	216	283
Bbs4	Bardet-Biedl syndrome 4 (human)	0.00572439	0.99576	242.5	307	197	270
Bbs5	Bardet-Biedl syndrome 5 (human)	0.0304199	0.99576	83	105	55	105
Bbs7	Bardet-Biedl syndrome 7 (human)	-0.304313	0.658746	250	303	231	357
Bbx	bobby sox HMG box containing	-0.0475068	0.99576	87	116	71	109
Bcam	basal cell adhesion molecule	0.407138	0.691474	1157	756	527	736
Bcap29	B cell receptor associated protein 29	-0.181054	0.866802	434	566	431	530
Bcap31	B cell receptor associated protein 31	-0.0741614	0.974359	2391	3098.5	2142	2770
Bcar1	breast cancer anti-estrogen resistance 1	0.173493	0.93159	474	454	280	435
Bcar3	breast cancer anti-estrogen resistance 3	0.194993	0.949636	194	422	206	241
Bcas1	breast carcinoma amplified sequence 1	-0.610797	NA	1	2	1	3
Bcas2	breast carcinoma amplified sequence 2	0.0430985	0.992474	558	641	463	522
Bcas3	breast carcinoma amplified sequence 3	-0.0136332	0.99576	388	474	310	435
Bcat1	branched chain aminotransferase 1, cytosolic	-0.0737701	0.982525	2500	4567.5	2743	3497
Bcat2	branched chain aminotransferase 2, mitochondrial	0.33662	0.444346	849	1020	535	731
Bccip	BRCA2 and CDKN1A interacting protein	0.0102584	0.99576	515	570.5	387	537.5
Bcdin3d	BCDIN3 domain containing	-0.285818	0.936805	44	39	38	49
Bche	butyrylcholinesterase	1.81524	NA	19	9	3	4
Bckdha	branched chain ketoacid dehydrogenase E1, alpha polypeptide	0.219215	0.778877	887	938	513	850
Bckdhb	branched chain ketoacid dehydrogenase E1, beta polypeptide	-0.218783	0.859341	538	470	413	606
Bckdk	branched chain ketoacid dehydrogenase kinase	-0.181896	0.786756	1062.5	1061	859	1219
Bcl10	B cell leukemia/lymphoma 10	0.204119	0.68616	801	904	519	754
Bcl11a	B cell CLL/lymphoma 11A (zinc finger protein)	0.346188	0.959309	30	17	15	17
Bcl11b	B cell leukemia/lymphoma 11B	0.532003	0.825491	48	48	20	38
Bcl2	B cell leukemia/lymphoma 2	0.621182	0.871407	23	25	15	11
BCL2A1	-	-0.206586	0.927474	1054	2115	1300	1772
Bcl2l1	BCL2-like 1	-0.293045	0.402085	536	685	548	727
Bcl2l11	BCL2-like 11 (apoptosis facilitator)	-0.195896	0.825491	307	348	279	362
Bcl2l12	BCL2-like 12 (proline rich)	0.208918	0.837529	243	299.5	163	239.5
Bcl2l13	BCL2-like 13 (apoptosis facilitator)	0.216814	0.905291	150	202	122	133
Bcl2l14	BCL2-like 14 (apoptosis facilitator)	-0.422674	0.933518	27	86	63	60
Bcl2l15	BCLl2-like 15	0.183987	NA	4	1	1	3
Bcl2l2	BCL2-like 2	-0.01656	0.99576	555	713	458	637.5
Bcl3	B cell leukemia/lymphoma 3	-0.0849294	0.979498	307	272	226	304
Bcl6	B cell leukemia/lymphoma 6	0.43083	0.358221	341	433	224	262
Bcl6b	B cell CLL/lymphoma 6, member B	0.122995	0.952088	321	355	238	291
Bcl7b	B cell CLL/lymphoma 7B	0.00978033	0.99576	348	460	283	403
Bcl7c	B cell CLL/lymphoma 7C	-0.690363	0.00171498	396	440.5	499	655
Bcl9l	B cell CLL/lymphoma 9-like	0.0104927	0.99576	737	847	536	821
Bclaf1	BCL2-associated transcription factor 1	-0.139341	0.876289	1547	1914	1392	1861
Bco1	beta-carotene oxygenase 1	2.09202	NA	5	5	1	1
Bco2	beta-carotene oxygenase 2	-0.333103	0.897959	68	57	58	78
Bcor	BCL6 interacting corepressor	0.263327	0.70392	381	488	265	352
Bcorl1	BCL6 co-repressor-like 1	0.0858456	0.987264	177	307	161	225
Bcs1l	BCS1-like (yeast)	-0.0156128	0.99576	124	174	93.5	166
Bdh1	3-hydroxybutyrate dehydrogenase, type 1	-0.0611939	0.990854	150	144	116	147
Bdh2	3-hydroxybutyrate dehydrogenase, type 2	-0.10841	0.975513	349	307	242	374
Bdkrb1	bradykinin receptor, beta 1	-1.00466	0.52633	12	14	22	22
Bdkrb2	bradykinin receptor, beta 2	0.739833	0.494587	267	168	92	137
Bdp1	B double prime 1, subunit of RNA polymerase III transcription initiation factor IIIB	0.0862984	0.99576	25	29	21	22
Becn1	beclin 1, autophagy related	0.0892913	0.945395	1045	1374.5	802	1142.5
Begain	brain-enriched guanylate kinase-associated	0.575196	0.812412	43	39	27	19
Bend5	BEN domain containing 5	-0.0767965	0.99576	31	16	16	28
Bend6	BEN domain containing 6	0.280108	0.857387	154	251	137	141
Bend7	BEN domain containing 7	0.833745	NA	4	15	3	6
Best3	bestrophin 3	1.20564	NA	15	3	3	4
Bet1	Bet1 golgi vesicular membrane trafficking protein	0.0774746	0.960632	1029	1225	786	1038
Bet1l	Bet1 golgi vesicular membrane trafficking protein like	0.108273	0.927679	749	923	570	753
Bex1	brain expressed X-linked 1	0.327572	0.975513	19	9	11	8
Bex2	brain expressed X-linked 2	2.08922	NA	5	5	1	1
Bfar	bifunctional apoptosis regulator	-0.08878	0.974359	504.5	774.5	477	679
Bfsp1	beaded filament structural protein 1, in lens-CP94	-0.202636	0.963033	65	82	63	81
Bfsp2	beaded filament structural protein 2, phakinin	-0.924063	NA	5	0	6	2
Bgn	biglycan	1.05123	1.12e-06	25246	36784	11096	14219.5
Bhlhb9	basic helix-loop-helix domain containing, class B9	-0.229856	0.899387	218	230	210	236
Bhlhe22	basic helix-loop-helix family, member e22	2.11982	0.297621	33	13	6	3
Bhlhe23	basic helix-loop-helix family, member e23	0.492799	NA	8	0	3	2
Bhlhe40	basic helix-loop-helix family, member e40	1.04808	3.4e-07	1887	2246	741	964
Bicc1	BicC family RNA binding protein 1	0.331858	0.455364	555	716	382	475
Bicd1	BICD cargo adaptor 1	0.377219	0.934674	64	52	38	38
Bicd2	BICD cargo adaptor 2	-0.0438639	0.990625	1087	1589	990	1354
Bid	BH3 interacting domain death agonist	-0.390212	0.471221	246	332	264	384
Bik	BCL2-interacting killer	-0.454633	0.897959	42	30	39	46
Bin1	bridging integrator 1	0.606339	0.189938	2365	1698	1051	1254
Bin2	bridging integrator 2	-0.353241	0.495629	405.5	627.5	504	608
BIN2A	-	-1.68609	NA	3	1	6	5
Bin3	bridging integrator 3	-0.191243	0.768414	591	753	543	770
Birc2	baculoviral IAP repeat-containing 2	0.0119446	0.99576	736	1357.5	726.75	1027
Birc3	baculoviral IAP repeat-containing 3	-0.100287	0.974749	268	423.5	269.25	359
Birc5	baculoviral IAP repeat-containing 5	0.058237	0.992985	94	149	96	99
Birc6	baculoviral IAP repeat-containing 6	0.0900786	0.945395	2165.5	2993	1822	2280
Bivm	basic, immunoglobulin-like variable motif containing	-0.214584	0.857786	330	397	307	414
Blcap	bladder cancer associated protein	0.204381	0.794337	492	502	332	405
BLES03	-	-0.173228	0.815317	611	681	521	730
Blk	B lymphoid kinase	-0.551069	0.874974	24.5	26	22	42
Blmh	bleomycin hydrolase	0.00472805	0.99576	1178	1367	930	1239
Blnk	B cell linker	0.349096	0.759413	437	867	353	511
Bloc1s1	biogenesis of lysosomal organelles complex-1, subunit 1	-0.272495	0.540769	1051	1128	980	1273
Bloc1s2	biogenesis of lysosomal organelles complex-1, subunit 2	-0.0273772	0.99576	534	827	530	637
Bloc1s4	biogenesis of lysosomal organelles complex-1, subunit 4, cappuccino	0.0545832	0.990854	197	184	126	192
Bloc1s5	biogenesis of lysosomal organelles complex-1, subunit 5, muted	-0.214347	0.825491	355	496	364.5	474.5
Bloc1s6	biogenesis of lysosomal organelles complex-1, subunit 6, pallidin	0.288097	0.751346	305	314	191	243
Blvra	biliverdin reductase A	-0.335474	0.70392	986.5	1685	1205	1642.5
Blvrb	biliverdin reductase B (flavin reductase (NADPH))	-0.219373	0.652776	906.5	1192	897.5	1179.5
Blzf1	basic leucine zipper nuclear factor 1	0.230976	0.783286	345	433	240	326
Bmf	BCL2 modifying factor	-0.395938	0.713184	210	178	164	284
Bmi1	Bmi1 polycomb ring finger oncogene	0.0110497	0.99576	191	259	163	217
Bmp1	bone morphogenetic protein 1	-0.209498	0.857786	2704	4201	2864	3902
Bmp15	bone morphogenetic protein 15	0.279106	NA	11	9	3	12
Bmp2	bone morphogenetic protein 2	-0.527043	0.825491	29	36	34	46
Bmp3	bone morphogenetic protein 3	0.750744	0.866802	17	123	35	31
Bmp4	bone morphogenetic protein 4	1.33402	0.0124685	362.67	216	82.5	120
Bmp5	bone morphogenetic protein 5	2.42176	0.171864	210	29	19	21
Bmp6	bone morphogenetic protein 6	1.54264	0.442624	23	50	9	12
Bmp7	bone morphogenetic protein 7	-0.297656	0.871407	201	428	274	375
Bmp8a	bone morphogenetic protein 8a	-0.850343	0.952898	8	0	6	7
Bmper	BMP-binding endothelial regulator	0.792492	0.516046	199	95	62	88
Bmpr1a	bone morphogenetic protein receptor, type 1A	0.288349	0.501279	709	827	477	594
Bmpr1b	bone morphogenetic protein receptor, type 1B	1.86659	0.467511	25	25	4	8
Bmpr2	bone morphogenetic protein receptor, type II (serine/threonine kinase)	-0.01257	0.99576	567	641	478	556
Bms1	BMS1, ribosome biogenesis factor	0.0735375	0.971539	596	709	441	622
Bmx	BMX non-receptor tyrosine kinase	-0.00356508	0.99895	56	42	41	43
Bmyc	brain expressed myelocytomatosis oncogene	0.421509	0.787655	139	109	70	90
Bnc1	basonuclin 1	-0.119474	0.99576	28	6	15	18.5
Bnc2	basonuclin 2	0.447674	0.467511	253	347	153	223
Bnip1	BCL2/adenovirus E1B interacting protein 1	-0.384112	0.509423	304	315	287	409
Bnip2	BCL2/adenovirus E1B interacting protein 2	0.2088	0.778877	873	1250	698	853
Bnip3	BCL2/adenovirus E1B interacting protein 3	-0.0110108	0.99576	1641.5	1843	1307	1694.5
Bnip3l	BCL2/adenovirus E1B interacting protein 3-like	-0.113363	0.928503	2804	3339	2509	3145
Bnipl	BCL2/adenovirus E1B 19kD interacting protein like	-0.474244	0.984866	46	14	30	45
Bod1	biorientation of chromosomes in cell division 1	0.386838	0.619069	247	245	140	183
Bok	BCL2-related ovarian killer	0.155342	0.975513	261	198	159	197
Bola1	bolA-like 1 (E. coli)	0.40371	0.688092	147	157	93	102
Bola3	bolA-like 3 (E. coli)	0.164002	0.935129	176	181	119	154
Bop1	block of proliferation 1	-0.251167	0.57377	536	579	496	639
Bora	bora, aurora kinase A activator	-0.307216	0.866802	80	134.5	88	137.5
Bpgm	2,3-bisphosphoglycerate mutase	0.0356959	0.99576	1147	1077	806	1062
Bphl	biphenyl hydrolase-like (serine hydrolase, breast epithelial mucin-associated antigen)	-0.172869	0.971539	120	135	102	145
Bpifb1	BPI fold containing family B, member 1	-4.72737	NA	0	1	12	10
Bpifc	BPI fold containing family C	-0.116669	0.99576	38	6	19	24
Bpnt1	bisphosphate 3'-nucleotidase 1	0.278186	0.724515	354	521	267	344
Brap	BRCA1 associated protein	0.035181	0.992474	435	492	321	456
Brca1	breast cancer 1, early onset	0.0554361	0.995702	74	120	68	90
Brca2	breast cancer 2, early onset	0.286119	0.773163	210	246	144	174
Brcc3	BRCA1/BRCA2-containing complex, subunit 3	-0.0522152	0.988702	537	785	492	673
Brd1	bromodomain containing 1	-0.227921	0.689015	497	571	458	612
Brd2	bromodomain containing 2	0.0506118	0.979035	2024	2014	1447	1902
Brd3	bromodomain containing 3	-0.125129	0.952439	331	402	301.5	377.5
Brd4	bromodomain containing 4	-0.215107	0.689015	901	1060	836	1109
Brd7	bromodomain containing 7	0.109603	0.920357	801	1057.5	640	823.5
Brd8	bromodomain containing 8	-0.110393	0.950107	422	520	364	506
Brd9	bromodomain containing 9	0.165545	0.850094	477	571	323	480.5
BRE	-	0.130463	0.945395	771	971	578	780
Brf1	BRF1, RNA polymerase III transcription initiation factor 90 kDa subunit	-0.0969797	0.968784	273	308	227	305
Brf2	BRF2, RNA polymerase III transcription initiation factor 50kDa subunit	-0.0512852	0.993678	130	147	124	117
Bri3	brain protein I3	-0.24803	0.638093	476	582	477	591
Bri3bp	Bri3 binding protein	-0.119632	0.981372	82	132	72	128
Brinp1	bone morphogenic protein/retinoic acid inducible neural specific 1	0.326265	NA	10	1	3	5
Brinp2	bone morphogenic protein/retinoic acid inducible neural-specific 2	0.995316	NA	9	3	4	1
Brinp3	bone morphogenetic protein/retinoic acid inducible neural specific 3	-1.86249	NA	4	16	23	38
Brix1	BRX1, biogenesis of ribosomes	-0.0997726	0.955803	429	486	356	484
Brk1	BRICK1, SCAR/WAVE actin-nucleating complex subunit	-0.271562	0.62531	2511	3309	2577	3399
Brms1	breast cancer metastasis-suppressor 1	-0.463955	0.0399323	942	995	1020	1261
Brms1l	breast cancer metastasis-suppressor 1-like	0.00315491	0.99629	478	538.67	377.67	489.33
Brox	BRO1 domain and CAAX motif containing	0.0715673	0.958352	1122	1345	875	1126
Brpf1	bromodomain and PHD finger containing, 1	-0.154333	0.948007	361	290	248	385
Brpf3	bromodomain and PHD finger containing, 3	-0.0434835	0.99576	114	132	92	125
Brsk1	BR serine/threonine kinase 1	0.154379	0.975513	81.5	78.5	60.5	62.5
Bscl2	Berardinelli-Seip congenital lipodystrophy 2 (seipin)	-0.21512	0.684367	743	828	660	904.5
Bsdc1	BSD domain containing 1	0.214365	0.703937	713	836	459.5	689
Bsg	basigin	-0.397131	0.0790902	4697	6315	5099	7295
Bsn	bassoon	-0.641717	NA	8	17	17	15
Bspry	B-box and SPRY domain containing	-0.816243	0.732478	75	31	77	86
Bst1	bone marrow stromal cell antigen 1	-0.183725	0.866802	362	549	384	491
Bst2	bone marrow stromal cell antigen 2	-0.432175	0.680224	1177	2534	1821	2361
Btaf1	B-TFIID TATA-box binding protein associated factor 1	0.00732892	0.99576	725	953	637	777
Btbd1	BTB (POZ) domain containing 1	0.137438	0.883038	1630	1546	1119	1352
Btbd10	BTB (POZ) domain containing 10	0.28001	0.717109	318	437	222	308
Btbd16	BTB (POZ) domain containing 16	-0.778185	NA	2	7	5	8
Btbd3	BTB (POZ) domain containing 3	0.523577	0.762331	203	107	64	130
Btbd6	BTB (POZ) domain containing 6	0.0419243	0.990854	472	525	337	497
Btbd7	BTB (POZ) domain containing 7	0.0232001	0.99576	375	495	305	425.5
Btbd9	BTB (POZ) domain containing 9	-0.0509069	0.994054	147	198	131	173
Btc	betacellulin, epidermal growth factor family member	1.76992	NA	9	3	2	1
Btd	biotinidase	0.630006	0.0479861	468	650	244	375
Btf3	basic transcription factor 3	0.124171	0.815317	3628.5	4038.5	2677.5	3317
Btg1	BTG anti-proliferation factor 1	0.0295422	0.99576	2213.5	2841	1847	2361
Btg2	BTG anti-proliferation factor 2	0.0383197	0.99576	838	829	596	801
Btg3	-	-0.0869306	0.983896	317	301	246	318
Btk	Bruton agammaglobulinemia tyrosine kinase	-0.319422	0.770134	276	530	372	471
Btla	B and T lymphocyte associated	0.728555	NA	8	8	5	3
BTN3A2	-	-0.469213	0.964792	7.25	27.58	21	17.92
BTNL5	-	-0.76393	NA	4	7.9	8.5	9.2
BTNL7	-	-0.363963	0.965011	14	52.95	28.25	44.1
BTNL8	-	-1.31336	NA	8.58	8.82	17.83	19.62
Btrc	beta-transducin repeat containing protein	0.477011	0.283876	275	331	163	208
Bub1	BUB1, mitotic checkpoint serine/threonine kinase	-0.0211332	0.99576	374	567	352	456
Bub1b	BUB1B, mitotic checkpoint serine/threonine kinase	0.117522	0.977052	166	297	139	225
Bub3	BUB3 mitotic checkpoint protein	-0.182117	0.759498	910	1043	800	1099
Bud13	BUD13 homolog	0.31095	0.732374	307	285	184.5	225
Bud31	BUD31 homolog	0.0171111	0.99576	847	830.5	654.5	759
Bves	blood vessel epicardial substance	1.08628	0.643514	71	24	16	24
Bysl	bystin-like	0.436778	0.240519	348	385	193	272
Bzw1	basic leucine zipper and W2 domains 1	0.103378	0.888654	2837	3305	2167	2700
Bzw2	basic leucine zipper and W2 domains 2	-0.0769792	0.974359	593	609	494	587
C1d	C1D nuclear receptor co-repressor	-0.142237	0.866802	582	699	512	697
C1galt1	core 1 synthase, glycoprotein-N-acetylgalactosamine 3-beta-galactosyltransferase, 1	-0.0310563	0.99576	363	625	377	471
C1galt1c1	C1GALT1-specific chaperone 1	-0.593191	0.0695603	355	379	372	587
C1qa	complement component 1, q subcomponent, alpha polypeptide	-0.448096	0.723011	12303	14979	13060	18890
C1qb	complement component 1, q subcomponent, beta polypeptide	-0.21479	0.952898	8133	9717	7670	9999
C1qbp	complement component 1, q subcomponent binding protein	-0.255247	0.445507	792	962	790	991
C1qc	complement component 1, q subcomponent, C chain	-0.293274	0.884891	13096	15666	12355	17927
C1ql3	C1q-like 3	-1.06729	0.732861	10	17	20	28
C1qtnf1	C1q and tumor necrosis factor related protein 1	-0.102206	0.959309	1871	2610	1713	2385
C1qtnf2	C1q and tumor necrosis factor related protein 2	0.476796	0.177241	1899	2137	1079.5	1398
C1qtnf3	C1q and tumor necrosis factor related protein 3	1.50584	0.000150404	1796	1751	444	636
C1qtnf4	C1q and tumor necrosis factor related protein 4	0.91419	NA	7	2	3	1
C1qtnf5	C1q and tumor necrosis factor related protein 5	0.646319	0.015197	1540	1391	660	965
C1qtnf6	C1q and tumor necrosis factor related protein 6	0.3013	0.566773	5286	8627	4011	5550
C1qtnf7	C1q and tumor necrosis factor related protein 7	-0.070522	0.995702	288	475	276	405
C1qtnf9	C1q and tumor necrosis factor related protein 9	0.241258	0.934674	138	209	106	143
C1R	-	0.173896	0.909573	12028	20396	10098	14238
C1rl	complement component 1, r subcomponent-like	-0.381274	0.773437	112	178	118	207
C1S	-	-0.377186	0.758979	19190.5	26866	21321.5	29624
C2	complement component 2 (within H-2S)	-0.0539666	0.988702	15287	25760	14812	21327
C2cd2	C2 calcium-dependent domain containing 2	0.230566	0.879755	271	248	187	188
C2cd2l	C2 calcium-dependent domain containing 2-like	-0.0714356	0.975513	434	452	353	443
C2cd3	C2 calcium-dependent domain containing 3	0.344585	0.617061	242	341	164	227
C2cd4c	C2 calcium-dependent domain containing 4C	-1.31935	NA	6	7	15	12
C2cd5	C2 calcium-dependent domain containing 5	0.00665578	0.99576	262	278	213	244
C3	complement component 3	-0.482776	0.938947	317	617	491	598
C3ar1	complement component 3a receptor 1	-0.146186	0.974359	687	768.5	600	776
C4a	complement component 4A (Rodgers blood group)	-0.336339	0.856873	18335.8	43545.2	26980.5	38472.5
C4b	complement component 4B (Chido blood group)	-0.286222	0.899387	27849.8	68116.6	40444.7	57481.5
C4BPA	-	2.31903	NA	18	6	3	1
C5ar1	complement component 5a receptor 1	-0.373535	0.110453	1751	2041	1808	2390
C5ar2	complement component 5a receptor 2	0.339862	0.720868	186	208	112	155
C6	complement component 6	-1.00801	0.146755	1894	4304	4514	5880
C8g	complement component 8, gamma polypeptide	-0.246507	0.960954	48.5	43	43.5	48
Caap1	caspase activity and apoptosis inhibitor 1	-0.0442747	0.99576	119.5	184	125	138
Cab39	calcium binding protein 39	-0.0669262	0.951504	2107.5	2444.5	1763	2310
Cab39l	calcium binding protein 39-like	-0.00590596	0.99576	624	747	493	686
Cabin1	calcineurin binding protein 1	0.208706	0.802359	666	745	442	605
Cables1	CDK5 and Abl enzyme substrate 1	-0.34364	0.866802	181	129	146	196
Cabp1	calcium binding protein 1	0.854389	NA	10	4	2	5
Cabp4	calcium binding protein 4	-0.261365	0.987464	12	10	13	9
Cabp7	calcium binding protein 7	0.241286	0.899387	100.5	124.5	68	94
Cabyr	calcium-binding tyrosine-(Y)-phosphorylation regulated (fibrousheathin 2)	-1.08628	NA	7	10	16	14
Cacfd1	calcium channel flower domain containing 1	-0.116731	0.97398	159	195	135	193.75
Cachd1	cache domain containing 1	0.0985831	0.980588	124	180	108	132
Cacna1a	calcium channel, voltage-dependent, P/Q type, alpha 1A subunit	0.289282	0.848453	139	143	85	113
Cacna1b	calcium channel, voltage-dependent, N type, alpha 1B subunit	2.5412	NA	4	10	1	1
Cacna1c	calcium channel, voltage-dependent, L type, alpha 1C subunit	0.189182	0.945383	161	189	114	148
Cacna1d	calcium channel, voltage-dependent, L type, alpha 1D subunit	-0.181006	0.98829	21	37	26	29
Cacna1e	calcium channel, voltage-dependent, R type, alpha 1E subunit	1.35809	NA	1	2	0	1
Cacna1f	calcium channel, voltage-dependent, alpha 1F subunit	-0.513646	NA	2	3	3	3
Cacna1g	calcium channel, voltage-dependent, T type, alpha 1G subunit	0.748547	0.689015	135	107	60	63
Cacna1h	calcium channel, voltage-dependent, T type, alpha 1H subunit	0.56151	0.927679	29.5	18	18	9
Cacna1i	calcium channel, voltage-dependent, alpha 1I subunit	-0.424092	0.974359	9	6	5	13
Cacna1s	calcium channel, voltage-dependent, L type, alpha 1S subunit	-0.326705	0.934674	1081	315	706	849
Cacna2d1	calcium channel, voltage-dependent, alpha2/delta subunit 1	0.89127	0.14458	665	466	244.5	282
Cacna2d2	calcium channel, voltage-dependent, alpha 2/delta subunit 2	-0.188859	0.978137	38	44	38	41
Cacna2d3	calcium channel, voltage-dependent, alpha2/delta subunit 3	-0.121823	0.99576	29	6	15	19
Cacna2d4	calcium channel, voltage-dependent, alpha 2/delta subunit 4	-0.314384	NA	3	9	7	5
Cacnb1	calcium channel, voltage-dependent, beta 1 subunit	0.430712	0.910348	335	104	120	172
Cacnb2	calcium channel, voltage-dependent, beta 2 subunit	0.205884	NA	11	7	4	10
Cacnb3	calcium channel, voltage-dependent, beta 3 subunit	-0.39032	0.39083	286	354	291	429
Cacnb4	calcium channel, voltage-dependent, beta 4 subunit	0.170733	0.990187	36	56	23	48
Cacng1	calcium channel, voltage-dependent, gamma subunit 1	0.387489	0.883038	606	228	230	340
Cacng4	calcium channel, voltage-dependent, gamma subunit 4	-0.993546	NA	4	4	9	4
Cacng6	calcium channel, voltage-dependent, gamma subunit 6	0.183382	0.990625	53	24	32	26
Cactin	cactin, spliceosome C complex subunit	0.281094	0.758979	337	388	197	319
Cacul1	CDK2 associated, cullin domain 1	-0.0682105	0.974359	668	847.5	603.33	746
Cacybp	calcyclin binding protein	0.103258	0.938996	958	1045	702	891
Cad	carbamoyl-phosphate synthetase 2, aspartate transcarbamylase, and dihydroorotase	0.162696	0.933014	816	1158	676	811
Cadm1	cell adhesion molecule 1	0.396894	0.781889	89	98	55	66
Cadm3	cell adhesion molecule 3	-0.0309488	0.99576	1587	2962	1730	2160
Cadm4	cell adhesion molecule 4	0.51082	0.800728	88	176	69	86
Cage1	cancer antigen 1	-0.0716331	0.99576	14	34	15	28
Calcoco1	calcium binding and coiled coil domain 1	0.251148	0.484388	1194	1265	782	984
Calcr	calcitonin receptor	-0.242675	NA	5	5	1	10
Calcrl	calcitonin receptor-like	0.0495421	0.993175	635	713	505	602
Cald1	caldesmon 1	0.457574	0.346056	2907	3801	1812	2338
Calhm2	calcium homeostasis modulator family member 2	0.554175	0.0655805	622	658	327	419
Calm1	calmodulin 1	0.0117004	0.99576	13096	17588	11445	14334
Calm2	calmodulin 2	-0.0138704	0.99576	5364	6133	4299	5620
Calm3	calmodulin 3	-0.0231502	0.99576	1284	1534	1019	1436
Calml3	calmodulin-like 3	0.165036	0.99576	354	55	150	178
Calml4	calmodulin-like 4	0.129571	0.978137	167	266	136	201
Calr	calreticulin	0.104476	0.945383	16020	25325	14092	18377
Calr3	calreticulin 3	0.589802	0.667981	68	72	33	47
Calu	calumenin	0.132841	0.909474	11876	16195	9629	12040
Camk1	calcium/calmodulin-dependent protein kinase I	0.162007	0.844641	950.5	1107	606	985
Camk1d	calcium/calmodulin-dependent protein kinase ID	-0.484245	0.5282	173	261	227	286
Camk2a	calcium/calmodulin-dependent protein kinase II alpha	1.34208	0.230677	150	61	34	39
Camk2b	calcium/calmodulin-dependent protein kinase II, beta	0.469257	0.797281	359	173	140	200
Camk2d	calcium/calmodulin-dependent protein kinase II, delta	0.0580576	0.990187	695	1072.5	640	790
Camk2g	calcium/calmodulin-dependent protein kinase II gamma	0.0988325	0.978137	210.67	233.67	148.17	208.83
Camk2n1	calcium/calmodulin-dependent protein kinase II inhibitor 1	0.150064	0.978137	75	137	73	87
Camk2n2	calcium/calmodulin-dependent protein kinase II inhibitor 2	-0.369594	NA	3	3	1	6
Camk4	calcium/calmodulin-dependent protein kinase IV	0.043145	0.99576	12	20	8	19
Camkk1	calcium/calmodulin-dependent protein kinase kinase 1, alpha	-0.176766	0.896205	545	896	605	767
Camkk2	calcium/calmodulin-dependent protein kinase kinase 2, beta	0.155608	0.97881	115	109	82	89
Camkmt	calmodulin-lysine N-methyltransferase	0.0611016	0.994973	87	143	74	114
CAMLG	-	-0.0724811	0.981372	311	339	280	298
Camp	cathelicidin antimicrobial peptide	0.119653	NA	1	8	2	5
Camsap1	calmodulin regulated spectrin-associated protein 1	0.145648	0.921154	500	587	345	499
Camsap2	calmodulin regulated spectrin-associated protein family, member 2	-0.000916234	0.99895	1012	1266	877	1055
Camsap3	calmodulin regulated spectrin-associated protein family, member 3	0.13164	0.99576	81	6	33	39
Camta1	calmodulin binding transcription activator 1	0.0831588	0.994672	80	52	60	45
Camta2	calmodulin binding transcription activator 2	-0.173847	0.812908	748	1015	696	1004
Cand1	cullin associated and neddylation disassociated 1	0.0585823	0.974359	1989	2576	1698	2007
Cand2	cullin-associated and neddylation-dissociated 2 (putative)	1.41124	0.050927	477	200	101	123
Cant1	calcium activated nucleotidase 1	0.0333151	0.991463	784	965	577	895
Canx	calnexin	0.0943341	0.938947	7843	11298	6785	8344
Cap1	CAP, adenylate cyclase-associated protein 1 (yeast)	-0.176157	0.703646	5384	7345	5376	6809
Cap2	CAP, adenylate cyclase-associated protein, 2 (yeast)	1.21954	0.299169	149	59	38	40
Capg	capping protein (actin filament), gelsolin-like	-0.41368	0.0507204	4178	5703	4678	6549
Capn1	calpain 1	0.159314	0.757579	1518	1646	1081	1336
Capn10	calpain 10	0.166981	0.932998	237	258	153	227
Capn12	calpain 12	0.014376	0.99576	210.5	146.5	125.5	181.5
Capn13	calpain 13	-0.133362	0.990854	25	96	49	60
Capn15	calpain 15	0.0227007	0.99576	195	196	140	191
Capn2	calpain 2	0.00508247	0.99576	3980	5706	3494	4702
Capn3	calpain 3	0.267174	0.937908	419	197	218	226
Capn5	calpain 5	0.38958	0.788723	286	666	250	360
Capn6	calpain 6	1.776	0.343116	1079	268	165	184
Capn7	calpain 7	-0.0883518	0.955759	509	578	427	561
Capn8	calpain 8	-0.773513	0.932409	12	3	9	14
Capns1	calpain, small subunit 1	-0.175876	0.573061	3422.83	4090.83	3087.83	4168.83
Capns2	calpain, small subunit 2	0.344783	0.975513	39	8	11	23
Caprin1	cell cycle associated protein 1	0.151236	0.825491	3878	5418	3121	3967
Capza1	capping protein (actin filament) muscle Z-line, alpha 1	-0.139021	0.894979	2722.5	4087.5	2780	3556.5
Capza2	capping protein (actin filament) muscle Z-line, alpha 2	-0.167041	0.739286	3467	4588	3405	4260
Capzb	capping protein (actin filament) muscle Z-line, beta	0.0769209	0.944165	4528.5	5757	3602	4697
Car11	carbonic anhydrase 11	0.367751	0.883038	171	91	73	106
Car12	carbonic anhydrase 12	-0.797818	0.837155	8	17	14	23
Car13	carbonic anhydrase 13	-0.0422338	0.99576	134	176.5	115.5	156
Car14	carbonic anhydrase 14	0.621459	0.685746	201	103	73	101
Car2	carbonic anhydrase 2	-0.77331	0.609237	164	240	276	302
Car3	carbonic anhydrase 3	1.33622	0.27597	21762	11132	4912	6561
Car4	carbonic anhydrase 4	-3.25633	9.04e-06	6	41	153	218
Car5b	carbonic anhydrase 5b, mitochondrial	-0.106834	0.954314	864	1312	855	1129
Car6	carbonic anhydrase 6	0.532017	0.904283	92	24	37	33
Car8	carbonic anhydrase 8	-0.12545	0.992474	34	200	94	113
Car9	carbonic anhydrase 9	1.73949	0.42739	21	215	25	32
Card10	caspase recruitment domain family, member 10	-0.140712	0.965137	232	250	197	258
Card6	caspase recruitment domain family, member 6	0.0500408	0.990854	566	543	409	509
Card9	caspase recruitment domain family, member 9	-0.0633843	0.990625	174	212	145	200
Carf	calcium response factor	0.141896	0.974359	108	134	85	101
Carhsp1	calcium regulated heat stable protein 1	-0.317264	0.451928	1100	1416	1135	1539
CARKD	-	0.108875	0.975513	260	219	175	206
Carm1	coactivator-associated arginine methyltransferase 1	-0.014739	0.99576	936.5	1160.5	784.5	1020.5
Cars	cysteinyl-tRNA synthetase	0.243048	0.819986	696	810	439	657
Cars2	cysteinyl-tRNA synthetase 2 (mitochondrial)(putative)	0.0952625	0.9851	160	158	109	147
Casc1	cancer susceptibility candidate 1	-0.142611	0.975607	69	90	54	98
Casc3	cancer susceptibility candidate 3	0.0224072	0.99576	272	354	233	290
Casc4	cancer susceptibility candidate 4	0.787858	0.0730663	374	301	135	206
CASC5	-	-0.31807	0.787822	249	440	346	367.5
Cask	calcium/calmodulin-dependent serine protein kinase (MAGUK family)	-0.108127	0.964724	422	505	382.5	467
Caskin1	CASK interacting protein 1	0.212696	0.975513	40	42	29	31
Caskin2	CASK-interacting protein 2	0.192118	0.945395	395	278	249	255
Casp1	caspase 1	-0.454105	0.0692054	847	1166	1035	1301
Casp12	caspase 12	0.0351885	0.992474	487	641	422	510
Casp14	caspase 14	-0.00530847	0.999351	2	5	2	4
Casp2	caspase 2	-0.0940535	0.945395	637	800	580	723
Casp3	caspase 3	-0.242106	0.541943	1055	1197	1013	1256
Casp4	caspase 4, apoptosis-related cysteine peptidase	-0.220414	0.807318	390	547	404	522
Casp6	caspase 6	-0.166479	0.875496	298	346	285	328
Casp7	caspase 7	-0.372499	0.616314	229	384	297	371
Casp8	caspase 8	-0.0705632	0.989735	203	325	202	267
Casp8ap2	caspase 8 associated protein 2	-0.0724796	0.974359	472	578	421	517
Casp9	caspase 9	0.0118743	0.99576	336	400	266	358
Casq1	calsequestrin 1	0.362448	0.850094	12172	4964	5069	6749
Casq2	calsequestrin 2	0.857941	0.473305	369	139	92	161
Cass4	Cas scaffolding protein family member 4	0.123666	0.978137	138	313	157	187
Cast	calpastatin	0.201779	0.794337	2985	3960	2283	2831
Cat	catalase	0.280586	0.669868	1726	2166	1195	1530
Catsper2	cation channel, sperm associated 2	-0.133868	0.990625	30	35	26	35
Catsperd	cation channel sperm associated auxiliary subunit delta	-0.0443868	0.99576	17	31	17	25
Catsperg1	cation channel sperm associated auxiliary subunit gamma 1	0.0395072	0.99576	99	133.25	79	114
Cav1	caveolin 1, caveolae protein	0.213351	0.93159	6770	5432	3918	5203
Cav2	caveolin 2	0.201693	0.825491	1236	1057	740	983
Cav3	caveolin 3	0.177006	0.975607	488	185	231	296
Cbfa2t2	CBFA2/RUNX1 translocation partner 2	0.340532	0.714669	177	256	122	169
Cbfa2t3	CBFA2/RUNX1 translocation partner 3	-0.101007	0.985377	131	107	97	123
Cbfb	core binding factor beta	0.118554	0.907472	1040	1396	805	1108
Cblb	Casitas B-lineage lymphoma b	-2.15e-05	0.999936	417	443	340	391
Cblc	Casitas B-lineage lymphoma c	0.464866	0.935129	34	18	14	19
Cbll1	Casitas B-lineage lymphoma-like 1	0.050223	0.990854	298	372	252	296
Cbln1	cerebellin 1 precursor protein	-0.899581	NA	6	0	1	10
Cbln2	cerebellin 2 precursor protein	-0.153211	0.99576	12	98	37	64
Cbr1	carbonyl reductase 1	0.177569	0.852633	594.99	557.99	387	487.99
Cbr3	carbonyl reductase 3	-0.125023	0.958465	229	248	186	261
Cbr4	carbonyl reductase 4	-0.141143	0.961246	151	224	158	191
Cbs	cystathionine beta-synthase	-0.211671	0.99576	85	46	58	75
Cbwd1	COBW domain containing 1	-0.230604	0.934824	86	98	86	97
Cbx2	chromobox 2	0.14622	0.978137	69	67	48	57
Cbx3	chromobox 3	-0.129752	0.850583	1981	2393	1730	2363
Cbx5	chromobox 5	0.147777	0.951504	199	260	163	187
Cbx6	chromobox 6	0.0543521	0.986393	626	636	454	588
Cbx7	chromobox 7	-0.330427	0.866802	109	83	90	119
Cbx8	chromobox 8	0.362033	0.837332	79	96	51	65
Cby1	chibby family member 1, beta catenin antagonist	0.13462	0.974359	136	150	88	137
Cc2d1a	coiled-coil and C2 domain containing 1A	-0.155339	0.93096	402	396	317	449.5
Cc2d1b	coiled-coil and C2 domain containing 1B	-0.162925	0.825233	569	636	487	670
Ccar1	cell division cycle and apoptosis regulator 1	0.0977726	0.951504	961.5	1212	754	975
Ccar2	cell cycle activator and apoptosis regulator 2	0.262075	0.534529	916	1093	636	789
CCBL1	-	-0.0572114	0.990854	263	240	197	253
CCBL2	-	-0.159937	0.988702	29	27	18	37
CCDC101	-	-0.104039	0.978137	277	224	214	248
Ccdc102a	coiled-coil domain containing 102A	-0.122242	0.953306	333	383	299	364
CCDC104	-	-0.0285833	0.993678	523	622	408	595
Ccdc112	coiled-coil domain containing 112	0.795851	0.534631	74	75	39	33
Ccdc114	coiled-coil domain containing 114	0.740707	NA	5	5	3	2
Ccdc115	coiled-coil domain containing 115	0.0856649	0.975513	261.5	349	215	274
Ccdc117	coiled-coil domain containing 117	-0.0378509	0.993175	256	308	206.5	290
Ccdc12	coiled-coil domain containing 12	-0.0691443	0.985522	375	374	294	380
Ccdc120	coiled-coil domain containing 120	-0.305653	0.913252	54	64	56	68
Ccdc124	coiled-coil domain containing 124	-0.150324	0.896219	833	793	661	894
Ccdc125	coiled-coil domain containing 125	-0.220475	0.894979	127	189	136	176
Ccdc126	coiled-coil domain containing 126	-0.133738	0.975513	81	99	79	88
Ccdc127	coiled-coil domain containing 127	0.341985	0.638596	280.5	300	157	238
Ccdc130	coiled-coil domain containing 130	-0.0964455	0.978598	143	188	127	175
CCDC132	-	-0.358216	0.297463	793	1059	902	1108
Ccdc134	coiled-coil domain containing 134	-0.24394	0.866385	161	168	152	180
Ccdc137	coiled-coil domain containing 137	0.136373	0.957834	186	185	124	166
Ccdc146	coiled-coil domain containing 146	0.116684	0.990854	33.5	59	37	34.5
Ccdc150	coiled-coil domain containing 150	-1.01636	0.783069	10	5	9	18
Ccdc152	coiled-coil domain containing 152	-0.540905	0.676535	173	185.5	215	226
Ccdc163	coiled-coil domain containing 163	-0.180635	0.967854	66	72	53	82
Ccdc167	coiled-coil domain containing 167	-0.0268188	0.99576	58	80	54	65
Ccdc17	coiled-coil domain containing 17	-0.447674	0.505409	147	146	152	190
Ccdc174	coiled-coil domain containing 174	0.45371	0.494587	186	251	123	147
Ccdc175	coiled-coil domain containing 175	-0.165498	0.986393	50	48	35	61
CCDC176	-	0.436483	0.866802	45	53	26.5	36.5
Ccdc181	coiled-coil domain containing 181	0.271568	0.896528	121	114	74	93
Ccdc183	coiled-coil domain containing 183	1.75258	NA	19	2	5	0
CCDC19	-	0.513199	0.868127	41	30	19	24
Ccdc22	coiled-coil domain containing 22	-0.251072	0.770503	364	412.5	318	478
Ccdc25	coiled-coil domain containing 25	-0.0100621	0.99576	310	401	262	348
Ccdc27	coiled-coil domain containing 27	1.72524	NA	1	14	0	4
Ccdc28a	coiled-coil domain containing 28A	-0.269189	0.876224	172	257.5	172	271.5
Ccdc28b	coiled coil domain containing 28B	0.0674616	0.991227	224.5	206	125	236
Ccdc32	coiled-coil domain containing 32	-0.141263	0.894979	405	475	350	481
Ccdc34	coiled-coil domain containing 34	0.153202	0.964733	117	162	93	120
Ccdc39	coiled-coil domain containing 39	-0.200867	0.955759	124	96	90	130
Ccdc43	coiled-coil domain containing 43	0.103499	0.97073	351	339	246	304
Ccdc47	coiled-coil domain containing 47	0.380727	0.0756006	1680	1812	1004	1290
Ccdc50	coiled-coil domain containing 50	0.568191	0.138426	454	705	276	388
Ccdc51	coiled-coil domain containing 51	0.673928	0.400998	109	93	48.5	61
CCDC53	-	-0.674566	0.025078	1413	1507	1751	2235
Ccdc58	coiled-coil domain containing 58	-0.0485426	0.990854	223	268.5	189	244
Ccdc59	coiled-coil domain containing 59	0.00996992	0.99576	148	193	126	162.5
Ccdc61	coiled-coil domain containing 61	0.208035	0.933836	108	152	75	118
Ccdc62	coiled-coil domain containing 62	-0.50569	0.588863	71	88	77	117
CCDC64	-	-0.0016229	0.999491	26	29	25	21
CCDC64B	-	-0.00510964	0.999392	126	17	60	69
Ccdc65	coiled-coil domain containing 65	0.476329	0.887304	57	61	34	38
Ccdc69	coiled-coil domain containing 69	-0.064739	0.99576	72	99	58	96
Ccdc71	coiled-coil domain containing 71	-0.0021252	0.998805	140	182	101	178
Ccdc77	coiled-coil domain containing 77	0.157723	0.952796	150	172	97	152
Ccdc8	coiled-coil domain containing 8	0.234429	0.847701	589	815	446	565
Ccdc80	coiled-coil domain containing 80	0.225516	0.874974	48402	94066.5	43750	58568
Ccdc81	coiled-coil domain containing 81	0.254655	0.975513	24	32	17	23
Ccdc82	coiled-coil domain containing 82	-0.14073	0.927	286	359	274	329
Ccdc85a	coiled-coil domain containing 85A	-0.304193	0.975513	23	17.5	14	31
Ccdc86	coiled-coil domain containing 86	0.709247	0.114045	274	236	125	142
Ccdc89	coiled-coil domain containing 89	-0.0669879	NA	4	7	7	2
Ccdc90b	coiled-coil domain containing 90B	-0.392735	0.205526	533	594	546	720
Ccdc91	coiled-coil domain containing 91	-0.206626	0.785464	440	484	385	530
Ccdc92	coiled-coil domain containing 92	-0.413574	0.558129	119	154	137	172
Ccdc93	coiled-coil domain containing 93	-0.0204337	0.99576	424	601	390	490
CCDC94	-	0.0364215	0.991586	352	407	287	342
Ccdc97	coiled-coil domain containing 97	-0.149797	0.874974	496	549	421	573
Cchcr1	coiled-coil alpha-helical rod protein 1	-0.0999679	0.974359	240	245	200	244
Cck	cholecystokinin	1.51888	0.128894	288	95	44	77
Ccl1	chemokine (C-C motif) ligand 1	-1.30453	NA	4	3	6	9
Ccl11	chemokine (C-C motif) ligand 11	-0.989248	0.576623	104	46	125	134
Ccl12	chemokine (C-C motif) ligand 12	-1.28762	0.638596	261	86	337	414
Ccl17	chemokine (C-C motif) ligand 17	0.207255	0.971539	55	108	54	64
Ccl19	chemokine (C-C motif) ligand 19	1.06428	0.874527	23	9	8	5
Ccl2	chemokine (C-C motif) ligand 2	-0.828446	0.0308434	1855	1225	2190	2537
Ccl20	chemokine (C-C motif) ligand 20	1.63646	0.690356	31	17	8	5
CCL21	-	0.827447	0.974359	2783	9	628	823
Ccl22	chemokine (C-C motif) ligand 22	0.836007	0.195479	429	1045	300	387
Ccl24	chemokine (C-C motif) ligand 24	0.211731	0.935647	824	1157	622	831
Ccl27	-	0.302612	NA	19	13	11.5	10
Ccl3	chemokine (C-C motif) ligand 3	-0.587275	0.678851	120	299	225	300
Ccl4	chemokine (C-C motif) ligand 4	-1.00858	0.0353385	66	84	120	135
Ccl5	chemokine (C-C motif) ligand 5	-0.570478	0.480012	156	243	218	283
Ccl6	chemokine (C-C motif) ligand 6	-0.701081	0.546063	1307	3258	2747	3402
Ccl7	chemokine (C-C motif) ligand 7	-0.835997	0.0790284	1231	710	1400	1606
Ccl9	chemokine (C-C motif) ligand 9	0.829104	0.333578	1846	3444	1077	1425
Ccm2	cerebral cavernous malformation 2	-0.296962	0.510292	694	826	675	923
Ccna1	cyclin A1	0.488813	NA	14	5	5	7
Ccna2	cyclin A2	0.174921	0.937536	217	387	205	243
Ccnb1	cyclin B1	-0.344131	0.703646	264	437	333	416
Ccnb2	cyclin B2	0.0322569	0.99576	285	476.5	282	343
Ccnc	cyclin C	-0.0132733	0.99576	456	597	385	521
Ccnd1	cyclin D1	0.376035	0.0889604	1593	1707	932	1249
Ccnd2	cyclin D2	0.224477	0.577869	916	1047	625	810
Ccnd3	cyclin D3	-0.0230369	0.99576	1538	1663	1155	1645
Ccndbp1	cyclin D-type binding-protein 1	-0.0223934	0.99576	503	529	397	499
Ccne1	cyclin E1	-0.130017	0.975513	100	160	99	143
Ccne2	cyclin E2	-0.0379788	0.99576	195	212	177	175
Ccnf	cyclin F	-0.140316	0.964733	157	234	178	182
Ccng1	cyclin G1	0.281335	0.608754	5690	5155	3424	4238
Ccng2	cyclin G2	-0.222871	0.678851	611	740	560	791
Ccnh	cyclin H	-0.163636	0.825491	527	590	463	607
Ccni	cyclin I	-0.233247	0.630588	1952	2205	1831	2340
Ccnj	cyclin J	0.418033	0.643514	187	163	101	124
Ccnjl	cyclin J-like	0.166175	0.992474	26	13	15	15
Ccnk	cyclin K	-0.28577	0.737765	227	309	242	313
Ccnl1	cyclin L1	-0.121325	0.955759	1119.17	960.5	863	1084
Ccnl2	cyclin L2	0.127555	0.959309	595	644.5	438.5	528.5
Ccnt1	cyclin T1	0.0546383	0.994672	97.17	107.83	68	102
Ccnt2	cyclin T2	0.10096	0.965269	675	702	483	616
Ccny	cyclin Y	0.135307	0.873467	823	943	569	812
Ccp110	centriolar coiled coil protein 110	0.0500338	0.99192	208	200	149	189
Ccpg1	cell cycle progression 1	0.316463	0.439411	1194	1725	874.5	1109
Ccpg1os	cell cycle progression 1, opposite strand	-0.0634028	0.99576	43	39	39	33
Ccr1	chemokine (C-C motif) receptor 1	-0.408906	0.802359	637	1962	1231	1623
Ccr10	chemokine (C-C motif) receptor 10	0.29111	NA	4.5	7	5.5	1
Ccr1l1	chemokine (C-C motif) receptor 1-like 1	-0.439785	NA	8	5	4	12
Ccr3	chemokine (C-C motif) receptor 3	-1.58988	0.558485	6	22	26	45
Ccr4	chemokine (C-C motif) receptor 4	0.546615	NA	5	5	2	4
Ccr5	chemokine (C-C motif) receptor 5	-0.123871	0.961825	1068	1618	1060	1420
Ccr6	chemokine (C-C motif) receptor 6	0.670292	NA	18	10	4	12
Ccr7	chemokine (C-C motif) receptor 7	-0.217571	0.966265	59	141	85	109
Ccr9	chemokine (C-C motif) receptor 9	0.767363	0.856873	17	15	8	8
Ccrl2	chemokine (C-C motif) receptor-like 2	-0.517092	0.630456	98	191	149	199
Ccs	copper chaperone for superoxide dismutase	-0.0170376	0.99576	443	548	354	505
Ccsap	centriole, cilia and spindle associated protein	0.124863	0.99576	17	21	20	8
Ccser1	coiled-coil serine rich 1	-0.303994	0.971646	21	39	40	19
Cct2	chaperonin containing Tcp1, subunit 2 (beta)	0.17965	0.705908	2686	3283	1976.5	2508
Cct3	chaperonin containing Tcp1, subunit 3 (gamma)	-0.110576	0.892553	2939	3279	2467	3281
Cct4	chaperonin containing Tcp1, subunit 4 (delta)	-0.167767	0.75117	3512	4109	3103	4226
Cct5	chaperonin containing Tcp1, subunit 5 (epsilon)	-0.396686	0.0562512	4243	4918	4320	6025
Cct6a	chaperonin containing Tcp1, subunit 6a (zeta)	0.339045	0.0906188	1561	1813	973	1309
Cct6b	chaperonin containing Tcp1, subunit 6b (zeta)	0.71306	NA	10	6	6	2
Cct7	chaperonin containing Tcp1, subunit 7 (eta)	-0.121821	0.850094	1940	2435	1712	2356
Cct8	chaperonin containing Tcp1, subunit 8 (theta)	-0.0888122	0.93159	2626	3207.5	2333	2944
Cct8l1	chaperonin containing TCP1, subunit 8 (theta)-like 1	-0.399959	NA	4	5	5	5
CCZ1B	-	-0.0881101	0.946997	1020	1258	894	1170
Cd101	CD101 antigen	0.352715	0.935129	30	68	29	35
Cd14	CD14 antigen	-0.358305	0.326404	2505	2290	2239	3073
Cd151	CD151 antigen	0.010803	0.99576	2932	2959	2118	2918
Cd163	CD163 antigen	-1.01211	0.534529	2504.5	3992	4673.5	6424.5
Cd163l1	CD163 molecule-like 1	0.510519	0.936805	21	14	6	16
Cd164	CD164 antigen	-0.07345	0.974359	7325	11343	7418	9112
Cd180	CD180 antigen	0.354184	0.798725	590	1447	567	762
Cd19	CD19 antigen	0.567811	NA	7	8	2	7
Cd1d1	CD1d1 antigen	0.0523294	0.991227	289	500	272	371
Cd2	CD2 antigen	-0.820501	0.210724	91	145	151	202
Cd200	CD200 antigen	0.110437	0.974359	650	1155	629	772
Cd200r1	CD200 receptor 1	0.0289494	0.99576	111	191	111	138.5
Cd209a	CD209a antigen	-2.20688	NA	3	2	5	16
Cd209b	CD209b antigen	-1.17972	NA	8	1	9	9
Cd209e	CD209e antigen	-1.75865	NA	7	4	8	26
Cd22	CD22 antigen	-0.130989	0.977404	166	367	208	281
Cd226	CD226 antigen	-0.0228064	0.99576	67	186	94	119
CD24	-	-0.512688	0.822299	189	64	147	171
CD244	-	-0.414538	0.740199	75.83	140.58	116.33	125
Cd247	CD247 antigen	0.249452	0.979498	44	69	29	53
Cd248	CD248 antigen, endosialin	0.0936251	0.969361	8296.87	14018.8	7251.89	10488.8
Cd27	CD27 antigen	0.426793	0.912428	32	46	18	32
Cd274	CD274 antigen	-0.592027	0.641139	53	68	49	111
Cd276	CD276 antigen	0.246156	0.638093	2691	3656	1896	2671
Cd28	CD28 antigen	0.0631491	0.99576	26	59	26	43
Cd2ap	CD2-associated protein	0.0485683	0.990854	504	795	445	621
Cd2bp2	CD2 cytoplasmic tail binding protein 2	0.0483927	0.978282	1029	1259	819	1067
Cd300a	CD300A molecule	-0.583425	0.145537	455	378	453	629
Cd300e	CD300E molecule	-0.12945	0.991227	30	102	53	66
Cd300lb	CD300 molecule like family member B	-0.249514	0.954515	63	170	112	115
CD300LE	-	-0.480965	0.483678	1927	1700	1868.75	2505
Cd300lf	CD300 molecule like family member F	-0.0011448	0.999392	282	717	362.25	469
Cd302	CD302 antigen	-0.349571	0.558485	1849	2205	1901	2509
Cd320	CD320 antigen	0.0643255	0.988702	517	507.5	351	495
Cd34	CD34 antigen	-0.0509886	0.992474	3574	6204	3743	4768
Cd36	CD36 molecule	0.184297	0.933014	5182.32	9472.84	4701.5	6132.43
Cd37	CD37 antigen	0.231327	0.774172	1017	1497	772	1046.5
Cd38	CD38 antigen	-0.0920999	0.982552	597	1183	678	916
Cd3d	CD3 antigen, delta polypeptide	-0.309526	0.969383	46	71	52	71
Cd3e	CD3 antigen, epsilon polypeptide	0.175456	0.988702	58	180	60	119
Cd3eap	CD3E antigen, epsilon polypeptide associated protein	0.376333	0.73309	277.5	243	153.5	191
Cd3g	CD3 antigen, gamma polypeptide	-0.456132	0.888306	63	86	74	100
Cd4	CD4 antigen	-0.321756	0.611023	3680	5268	3976	5544
Cd40	CD40 antigen	-0.450544	0.823161	60	132	87	135
Cd44	CD44 antigen	-0.0321165	0.99576	5225	5194	4018	5116
Cd46	CD46 antigen, complement regulatory protein	-0.287251	0.974359	18.5	26	18.5	28.5
Cd47	CD47 antigen (Rh-related antigen, integrin-associated signal transducer)	-0.177428	0.865206	1106	1702.5	1234	1430
Cd48	CD48 antigen	-0.334533	0.210187	4152	5303	4449	5682
Cd5	CD5 antigen	-0.157791	0.990854	36	108	65	66
Cd52	CD52 antigen	-0.551124	0.809373	37	60	49	72
Cd53	CD53 antigen	-0.239869	0.832846	2470	4648	3127	3907
Cd55	CD55 molecule, decay accelerating factor for complement	-0.258829	0.905726	600	1395	873	1114
CD59	-	0.270357	0.616439	2434	3062	1683	2197
Cd5l	CD5 antigen-like	0.432169	0.445507	1726	2530	1136	1542
Cd6	CD6 antigen	0.250251	0.971188	46	122	41.5	78.5
Cd63	CD63 antigen	-0.0673372	0.975513	14184	20068	13123	17325
Cd68	CD68 antigen	0.236646	0.804935	4236	7741	3679	4869
Cd69	CD69 antigen	-0.663259	0.476244	72	178	152	176
Cd7	CD7 antigen	-0.147773	0.986393	160	159	123	183
Cd70	CD70 antigen	-0.168556	0.990854	14	38	20	29
Cd72	CD72 antigen	0.463639	0.443217	283	353	182	208.5
Cd74	CD74 antigen (invariant polypeptide of major histocompatibility complex, class II antigen-associated)	0.636229	0.116938	44234.5	69792	26879.5	35064.5
Cd79b	CD79B antigen	-0.363954	0.975513	16	13	11	22
Cd80	CD80 antigen	0.603487	0.698594	58	63	35	32
Cd81	CD81 antigen	0.728702	0.0108683	5806	4760	2262	3293
Cd82	CD82 antigen	-0.254008	0.566308	1898	1838	1598	2250
Cd83	CD83 antigen	0.0761621	0.989087	1343	1898	1152	1448
Cd84	CD84 antigen	0.646531	0.596914	286	984.5	285.5	384
Cd86	CD86 antigen	0.0625674	0.993321	246	613	316	363
Cd8a	CD8 antigen, alpha chain	0.0917186	0.986393	394	566	313	456
CD8B	-	-0.0264369	0.99576	94	114.5	73	109
Cd9	CD9 antigen	0.659862	0.000550924	5350	6152	2733	3475
Cd93	CD93 antigen	0.101772	0.948007	1828	2716	1563	2019
Cd96	CD96 antigen	0.25195	0.979162	42	44	19	45
CD99	-	-0.000191895	0.999936	1935	2514	1597	2201
Cd99l2	CD99 antigen-like 2	0.0750472	0.99576	71	21	47	27
Cda	cytidine deaminase	-4.63037	0.0756006	0	1	10	11
Cdadc1	cytidine and dCMP deaminase domain containing 1	0.320529	0.694838	455	385	265	312
Cdc123	cell division cycle 123	0.11164	0.909726	717	838	544	682
Cdc14a	CDC14 cell division cycle 14A	0.151354	0.967826	146	190	129	124
Cdc14b	CDC14 cell division cycle 14B	-0.223947	0.95624	66	138	97	100
Cdc16	CDC16 cell division cycle 16	0.0543101	0.977029	949	1161	749	984
Cdc20	cell division cycle 20	-0.225204	0.868127	153	228	158	221
Cdc23	CDC23 cell division cycle 23	0.122945	0.904161	764	997.25	592.5	785
Cdc25a	cell division cycle 25A	-0.0185203	0.99576	197	178	138	190
Cdc25b	cell division cycle 25B	-0.335227	0.686028	562	672	593	730
Cdc25c	cell division cycle 25C	0.285805	0.927337	71	104	64	55
Cdc26	cell division cycle 26	-0.0872303	0.971539	434	517	363	502
Cdc27	cell division cycle 27	-0.0486746	0.990854	443	635	434	505
Cdc34	cell division cycle 34	-0.481467	0.255858	451	407	400	645
Cdc37	cell division cycle 37	-0.143484	0.771708	1844	2035.5	1583.5	2084
Cdc37l1	cell division cycle 37-like 1	0.440464	0.267228	436	457	240	325
Cdc40	cell division cycle 40	0.13199	0.945395	467	586	346	475
Cdc42	cell division cycle 42	0.202598	0.678851	3829	5263	3022	3649
Cdc42bpa	CDC42 binding protein kinase alpha	0.256759	0.676535	761	947	528	690
Cdc42bpb	CDC42 binding protein kinase beta	-0.0565662	0.990625	908	1225	805	1083
Cdc42bpg	CDC42 binding protein kinase gamma (DMPK-like)	-0.0118778	0.99576	224	86	126	149
Cdc42ep1	CDC42 effector protein (Rho GTPase binding) 1	0.233782	0.840269	454	383	257	360.5
Cdc42ep2	CDC42 effector protein (Rho GTPase binding) 2	0.264298	0.598343	792	909.5	542	664
Cdc42ep3	CDC42 effector protein (Rho GTPase binding) 3	0.715802	0.210797	364	301	177	166
Cdc42ep4	CDC42 effector protein (Rho GTPase binding) 4	0.0606915	0.975891	1073	1317	820	1141
Cdc42ep5	CDC42 effector protein (Rho GTPase binding) 5	-0.353415	0.60118	239	322	254	358
Cdc42se1	CDC42 small effector 1	-0.0482735	0.97881	1578	2102	1376	1866
Cdc42se2	CDC42 small effector 2	0.103286	0.964965	1449	1862	1090	1547
Cdc45	cell division cycle 45	-0.265943	0.920214	70	122	72	126
Cdc5l	cell division cycle 5-like (S. pombe)	0.28301	0.573061	1251	1416	835	1032
Cdc6	cell division cycle 6	0.263944	0.942416	56	113	44	76.5
Cdc7	cell division cycle 7 (S. cerevisiae)	0.0937887	0.990854	75	105	47	100
Cdc73	cell division cycle 73, Paf1/RNA polymerase II complex component	-0.431179	0.638093	111	125	122	149
Cdca2	cell division cycle associated 2	0.487719	0.678851	101	188	77	96
Cdca3	cell division cycle associated 3	-0.156025	0.961246	159.5	313.5	187	258
Cdca4	cell division cycle associated 4	0.0038005	0.996806	344	334	226	362.5
Cdca5	cell division cycle associated 5	-0.0463818	0.99576	21	37	20	31
Cdca7	cell division cycle associated 7	0.401862	0.748387	105	122	67	79
Cdca7l	cell division cycle associated 7 like	0.487571	0.797623	107	96	45	82
Cdca8	cell division cycle associated 8	0.146597	0.958465	138	225	117	161
Cdcp1	CUB domain containing protein 1	-0.328381	0.974359	16	13	11	21
Cdh1	cadherin 1	-0.0815152	0.99576	194	46	89	142
Cdh11	cadherin 11	1.42951	0.000143379	1552	1278	369	547
Cdh13	cadherin 13	0.607211	0.603561	2712	2242	1207	1609
Cdh15	cadherin 15	0.198627	0.992423	20	6	5	16
Cdh17	cadherin 17	0.753961	0.773163	16	78	19	27
Cdh19	cadherin 19, type 2	1.47974	NA	14	3	0	6
Cdh2	cadherin 2	1.75152	0.268388	116	80	28	21
Cdh23	cadherin 23 (otocadherin)	0.0267314	0.99576	32	64	27	54
Cdh26	cadherin-like 26	0.386448	NA	17	9	5	13
Cdh3	cadherin 3	0.890764	0.729501	108	161	56	66
Cdh5	cadherin 5	0.159397	0.883038	1317	1204	799	1158
Cdh6	cadherin 6	0.263152	0.97881	43	45	34	27
Cdh7	cadherin 7, type 2	-0.596789	0.507544	90	110	104	156
Cdhr1	cadherin-related family member 1	0.127941	0.99576	87	16	40	44
Cdhr5	cadherin-related family member 5	0.0386168	0.99576	55	56	39	54
Cdip1	cell death inducing Trp53 target 1	0.176303	0.921006	422	422	282	358
Cdipt	CDP-diacylglycerol--inositol 3-phosphatidyltransferase (phosphatidylinositol synthase)	0.0921232	0.9286	1148	1359	846	1168
Cdk1	cyclin-dependent kinase 1	0.0622657	0.989087	384	641	346	486
Cdk10	cyclin-dependent kinase 10	-0.0256065	0.99576	382.5	473	317	426.5
Cdk11b	cyclin-dependent kinase 11B	-0.0508056	0.979162	846	1018	707	942
Cdk12	cyclin-dependent kinase 12	-0.303133	0.612693	370	504	369	555
Cdk13	cyclin-dependent kinase 13	-0.00782333	0.99576	625	888	529	770
Cdk14	cyclin-dependent kinase 14	0.144652	0.935275	708	1197	642	807
Cdk16	cyclin-dependent kinase 16	-0.0579366	0.974359	1568	1634	1229	1631
Cdk17	cyclin-dependent kinase 17	-0.116963	0.951504	276	341	225	351
Cdk18	cyclin-dependent kinase 18	-0.702457	0.896219	4	6	5	9
Cdk19	cyclin-dependent kinase 19	-0.0406396	0.990854	691	816	603	712
Cdk2	cyclin-dependent kinase 2	-0.156461	0.917374	273	349	234	362
Cdk20	cyclin-dependent kinase 20	-0.178398	0.847701	341	372	297	394
Cdk2ap1	CDK2 (cyclin-dependent kinase 2)-associated protein 1	0.103588	0.894648	1328	1556	1007	1281
Cdk2ap2	CDK2-associated protein 2	0.129681	0.944165	585	776	443	619
Cdk4	cyclin-dependent kinase 4	-0.0372444	0.990625	2767.5	3017	2179.5	2908.5
Cdk5	cyclin-dependent kinase 5	-0.194453	0.805879	441	600	436	577
Cdk5r1	cyclin-dependent kinase 5, regulatory subunit 1 (p35)	-1.4652	NA	3	3	7	7
Cdk5rap1	CDK5 regulatory subunit associated protein 1	0.170952	0.942416	185	213	123	181
Cdk5rap2	CDK5 regulatory subunit associated protein 2	0.0142564	0.99576	333.5	521	318	396
Cdk5rap3	CDK5 regulatory subunit associated protein 3	-0.187239	0.686262	1068	1187	916	1290
Cdk6	cyclin-dependent kinase 6	-0.0581201	0.99576	90	107	76	99
Cdk8	cyclin-dependent kinase 8	0.164883	0.896205	313	370	246	269
Cdk9	cyclin-dependent kinase 9 (CDC2-related kinase)	-0.30273	0.562138	683	650	587	834
Cdkl1	cyclin-dependent kinase-like 1 (CDC2-related kinase)	0.0863713	0.99576	40	41	26	40
Cdkl2	cyclin-dependent kinase-like 2 (CDC2-related kinase)	0.0193108	0.99576	52	48	36	49
Cdkl3	cyclin-dependent kinase-like 3	0.581602	0.78333	62	71	41	33
Cdkn1a	cyclin-dependent kinase inhibitor 1A (P21)	0.00601955	0.99576	827	903	668	798
Cdkn1b	cyclin-dependent kinase inhibitor 1B	-0.0786475	0.971539	695	837	609	768
Cdkn1c	cyclin-dependent kinase inhibitor 1C (P57)	0.664116	0.668853	834	369	298	370
Cdkn2a	cyclin dependent kinase inhibitor 2A	1.03068	0.435861	87	76	29	40
Cdkn2aip	CDKN2A interacting protein	-0.138714	0.951504	188	208	149	227
Cdkn2aipnl	CDKN2A interacting protein N-terminal like	0.125056	0.899387	568	669	429	537
Cdkn2b	cyclin dependent kinase inhibitor 2B	1.34042	0.147524	208	192	59	77
Cdkn2c	cyclin dependent kinase inhibitor 2C	0.316292	0.787229	194	248	140.5	159.5
Cdkn3	cyclin-dependent kinase inhibitor 3	-0.227255	0.93159	97	176	125	142
Cdnf	cerebral dopamine neurotrophic factor	-0.129465	NA	20	5	12	12
Cdo1	cysteine dioxygenase 1, cytosolic	0.961547	0.787308	1068	586	339	401
Cdon	cell adhesion molecule-related/down-regulated by oncogenes	0.0299669	0.99576	1242	2277	1251	1646
Cdr2	cerebellar degeneration-related 2	0.0780396	0.975607	468	722	409	546
Cds1	CDP-diacylglycerol synthase 1	-0.370604	0.850583	47	101	76	83
Cds2	CDP-diacylglycerol synthase (phosphatidate cytidylyltransferase) 2	0.0883256	0.990854	113	158	84	135
Cdt1	chromatin licensing and DNA replication factor 1	0.0620034	0.993175	59	87	50	69
Cdv3	carnitine deficiency-associated gene expressed in ventricle 3	-0.0402607	0.99576	256.5	355.5	271	252.5
Cdx2	caudal type homeobox 2	-0.891485	NA	3	4	5	6
Cdyl	chromodomain protein, Y chromosome-like	0.0458997	0.995688	136	155	104	137
Cdyl2	chromodomain protein, Y chromosome-like 2	0.0531455	0.99576	77	91	65	72
Ceacam1	carcinoembryonic antigen-related cell adhesion molecule 1	0.115662	0.955759	337.33	422.33	235.33	368
Ceacam10	carcinoembryonic antigen-related cell adhesion molecule 10	-1.13279	0.210724	33.67	59.67	85.67	85
Ceacam19	carcinoembryonic antigen-related cell adhesion molecule 19	0.747797	0.964139	12	1	3	4
Cebpa	CCAAT/enhancer binding protein (C/EBP), alpha	-0.194472	0.899004	488	542	434	575
Cebpb	CCAAT/enhancer binding protein (C/EBP), beta	0.0219801	0.99576	497	489	393	432
Cebpd	CCAAT/enhancer binding protein (C/EBP), delta	-0.0949239	0.975513	401	513	360	471
Cebpe	CCAAT/enhancer binding protein (C/EBP), epsilon	-0.505785	0.809237	34	68	52	70
Cebpg	CCAAT/enhancer binding protein (C/EBP), gamma	0.092908	0.971779	420	412	271	404
Cebpz	CCAAT/enhancer binding protein zeta	0.0464743	0.988325	1152	1328	925	1116
Cecr2	CECR2, histone acetyl-lysine reader	0.692277	0.921006	31	11	10	13
CECR5	-	-0.0983558	0.978137	149	153	129	146
Cel	carboxyl ester lipase	-0.0684608	NA	2	6	3	4
Cela1	chymotrypsin-like elastase family, member 1	1.43985	0.339874	54	324	37	80
Cela2a	chymotrypsin-like elastase family, member 2A	-0.795106	0.85989	11	15	18	20
Celf1	CUGBP, Elav-like family member 1	0.199811	0.804101	500.5	605	358	462
Celf2	CUGBP, Elav-like family member 2	0.197194	0.880651	426	688	344.33	479.5
Celf3	CUGBP, Elav-like family member 3	-0.754473	0.903497	5	4	6	7
Celf4	CUGBP, Elav-like family member 4	1.71737	NA	8	3	1	2
Celf5	CUGBP, Elav-like family member 5	1.45339	NA	11	5	3	2
Celsr2	cadherin, EGF LAG seven-pass G-type receptor 2	0.438324	0.984373	148	42	49	78
Celsr3	cadherin, EGF LAG seven-pass G-type receptor 3	-0.464014	0.962808	4	8	6	8
Cend1	cell cycle exit and neuronal differentiation 1	2.14847	NA	9	12	2	2
Cenpa	centromere protein A	-0.16656	0.971646	61.5	100	65.5	88
CENPC	-	-0.0413024	0.992985	311	444	312	340
Cenpf	centromere protein F	-0.0911271	0.975513	251	399	263	320
Cenpi	centromere protein I	-0.297435	0.935647	49	140	91	100
Cenpj	centromere protein J	-0.135556	0.968784	229	399	218	373
Cenpk	centromere protein K	-0.344886	0.891758	54.5	99.5	78	85
Cenpl	centromere protein L	-0.0910461	0.986393	145	185	154	139
Cenpm	centromere protein M	0.138874	0.979498	71	110	61	78
Cenpn	centromere protein N	-0.36277	0.735849	86	123	100	128
Cenpq	centromere protein Q	-0.393064	0.874974	36	56	50	51
Cenpt	centromere protein T	-0.222553	0.945395	60	91.5	58	94
Cenpu	centromere protein U	0.00365672	0.998408	70	109	71	79
Cenpw	centromere protein W	-0.427154	0.783069	78	82	81	103
Cep104	centrosomal protein 104	0.0319215	0.99576	328	402	244	370
Cep112	centrosomal protein 112	0.0576171	0.99576	58	74	51	56
Cep120	centrosomal protein 120	-0.0378262	0.990854	503	571	398	547
Cep131	centrosomal protein 131	-0.226916	0.861039	181.5	202	156	231
Cep162	centrosomal protein 162	0.174961	0.945383	131	172	88	143
Cep19	centrosomal protein 19	0.300796	0.732375	325	368	208	273
Cep290	centrosomal protein 290	-0.324413	0.631375	232.5	263.5	237	291.5
Cep295	centrosomal protein 295	-0.109657	0.969124	223	306.25	213.5	269.75
Cep295nl	-	-0.824232	0.802154	10	13	18	16
Cep41	centrosomal protein 41	0.867497	0.227524	103	92	40	52
Cep44	centrosomal protein 44	0.0304737	0.99576	134	164	115	132
Cep55	centrosomal protein 55	-0.242319	0.913252	99	191	123	166
Cep57	centrosomal protein 57	-0.137182	0.955759	193	189	159	201
Cep57l1	centrosomal protein 57-like 1	-0.0902089	0.980588	136	179	121	165
Cep63	centrosomal protein 63	-0.0715133	0.983399	227	310.5	214.5	263.5
Cep70	centrosomal protein 70	-0.421106	0.874974	24	42	31	44
Cep76	centrosomal protein 76	0.0929438	0.984753	102	166	90	123
Cep78	centrosomal protein 78	-0.210765	0.935129	88	106	77	116
Cep83	centrosomal protein 83	0.25195	0.638093	505.5	657.5	356.5	477
Cep85	centrosomal protein 85	0.290082	0.705908	521	507	329	389
Cep85l	centrosomal protein 85-like	0.587006	0.62531	217	146	103	104
Cep89	centrosomal protein 89	-0.0190218	0.99576	237	276	188	257
Cep95	centrosomal protein 95	-0.021883	0.99576	231.5	238	174.5	235.5
Cep97	centrosomal protein 97	-0.0372597	0.99576	81	90	74	74
Cept1	choline/ethanolaminephosphotransferase 1	-0.491044	0.0251186	1089	1300	1231	1637
Cercam	cerebral endothelial cell adhesion molecule	0.343666	0.689741	2697.5	4013	1793	2729
Cerk	ceramide kinase	-0.0531502	0.988702	1251	1937	1180	1626
Cers1	ceramide synthase 1	-0.0503399	0.99576	50.5	36.5	34.5	43
Cers2	ceramide synthase 2	-0.098542	0.9155	1798	2294.5	1641.5	2079.5
Cers3	ceramide synthase 3	0.026088	0.99576	12	3	6	7
Cers4	ceramide synthase 4	0.133812	0.979498	108	119	69	110
Cers5	ceramide synthase 5	-0.119472	0.909474	1108	1574	1068	1404
Ces1a	carboxylesterase 1A	-1.05467	0.233963	30	41	60	64
Ces1c	carboxylesterase 1C	0.305802	NA	1	5	2	2
Ces1d	carboxylesterase 1D	1.44855	0.716764	467.83	337.67	109.67	146.83
Ces1e	carboxylesterase 1E	1.2418	0.643219	48.33	34.67	14.67	15.33
Ces1f	carboxylesterase 1F	0.852897	NA	19	13	4.5	12.5
Ces2c	carboxylesterase 2C	-0.188035	NA	0	1.5	0	1.67
Ces2g	carboxylesterase 2G	0.691722	0.959309	20	14	9	9
Ces2h	carboxylesterase 2H	1.9087	NA	0	5	1	0
CESL1	-	0.852897	NA	19	13	4.5	12.5
Cetn3	centrin 3	-0.315811	0.598593	421	500	454	516
Cetn4	centrin 4	0.150794	0.990625	35	31	23	28
Cfap126	cilia and flagella associated protein 126	0.631147	NA	12	7	3	8
Cfap20	cilia and flagella associated protein 20	0.271889	0.568394	477	560	311	424
Cfap52	cilia and flagella associated protein 52	1.12954	NA	8	8	4	2
Cfap97	cilia and flagella associated protein 97	0.153774	0.961	150	171	89	162
Cfb	complement factor B	-0.930319	0.00394047	1762	3194	3345	4624
Cfd	complement factor D (adipsin)	-0.0646372	0.994595	6589	5782	4606	6632
Cfdp1	craniofacial development protein 1	0.171649	0.825491	935	1147.67	660.33	923.33
Cfh	complement component factor h	-0.785393	0.000224368	6399	7565	8947.5	11578.5
Cfi	complement component factor i	-1.14454	0.263272	26	25	45	51
Cfl1	cofilin 1, non-muscle	0.275611	0.278149	14104	18383	9893	12929
Cfl2	cofilin 2, muscle	0.545076	0.246748	1907	1407	863	1106
Cflar	CASP8 and FADD-like apoptosis regulator	0.127754	0.932756	361	433	269	351
Cfp	complement factor properdin	0.0406036	0.99576	1640	3234	1627	2374
Cggbp1	CGG triplet repeat binding protein 1	-0.352438	0.134695	1151	1351	1221	1495
Cgnl1	cingulin-like 1	0.104218	0.969615	482	456	334	414
Cgref1	cell growth regulator with EF hand domain 1	0.00890703	0.99576	1884	3535	1859	2694
Cgrrf1	cell growth regulator with ring finger domain 1	-0.0860284	0.975513	575	578	474	571
Ch25h	cholesterol 25-hydroxylase	0.11079	0.985377	59	84	51	61
Chac1	ChaC, cation transport regulator 1	-1.15516	0.739286	235	53	247	330
Chac2	ChaC, cation transport regulator 2	0.107571	0.989087	82	75	60	64
Chad	chondroadherin	-0.405488	NA	13	9	12	13
Chaf1b	chromatin assembly factor 1, subunit B (p60)	-0.0274028	0.99576	66	91	59	77
Champ1	chromosome alignment maintaining phosphoprotein 1	0.264597	0.571417	532	615	360	454
Chchd1	coiled-coil-helix-coiled-coil-helix domain containing 1	-0.543006	0.139231	756	736	846	1011
Chchd10	coiled-coil-helix-coiled-coil-helix domain containing 10	0.249728	0.968784	207	74	93	116
Chchd2	coiled-coil-helix-coiled-coil-helix domain containing 2	-0.388484	0.301893	1348.66	1399.99	1364.99	1712.33
Chchd3	coiled-coil-helix-coiled-coil-helix domain containing 3	0.0167575	0.99576	1344	1399	1060	1249
Chchd4	coiled-coil-helix-coiled-coil-helix domain containing 4	-0.232118	0.918409	161	182	158	184
Chchd5	coiled-coil-helix-coiled-coil-helix domain containing 5	-0.33945	0.785274	165	200	174.5	219
Chchd6	coiled-coil-helix-coiled-coil-helix domain containing 6	-0.427952	0.438487	269	294	274	376
Chd1	chromodomain helicase DNA binding protein 1	-0.0788688	0.970585	578	804	531	710
Chd2	chromodomain helicase DNA binding protein 2	0.230639	0.868127	506	783	416	509
Chd6	chromodomain helicase DNA binding protein 6	0.207211	0.658746	822	968	561	766
Chd8	chromodomain helicase DNA binding protein 8	0.198498	0.745193	1130	1319	858	945
Chdh	choline dehydrogenase	-0.182653	NA	4	2	2	4
Chek1	checkpoint kinase 1	-0.176914	0.964965	92	112	84	113
Chek2	checkpoint kinase 2	0.194981	0.945395	102	136	76	101
Cherp	calcium homeostasis endoplasmic reticulum protein	-0.0530721	0.986701	573.5	604	436.5	616.5
Chfr	checkpoint with forkhead and ring finger domains	-0.117759	0.928503	556	630	484	614
CHI3L1	-	-1.45275	0.0028849	96	109	179	309
Chic2	cysteine-rich hydrophobic domain 2	-0.0542359	0.990854	209	285	208	223
Chid1	chitinase domain containing 1	0.154241	0.866385	856	1011	585	857
Chit1	chitinase 1 (chitotriosidase)	-0.398185	NA	13	7	14	8
Chka	choline kinase alpha	-0.475645	0.53794	105	136	121	165
Chkb	choline kinase beta	-0.23041	0.798709	418	392	333	490
Chm	choroidermia (RAB escort protein 1)	0.0935172	0.974359	332	455	300	319
Chml	choroideremia-like	-0.0266248	0.99576	40	43	33	39
Chmp1a	charged multivesicular body protein 1A	-0.10599	0.893938	1430	1666	1196	1660
Chmp1b	charged multivesicular body protein 1B	0.0585347	0.975513	970	1015	721	909
Chmp2a	charged multivesicular body protein 2A	-0.0216975	0.994912	1943	2279	1559	2108
Chmp3	charged multivesicular body protein 3	0.0240357	0.992474	1846	2075	1450	1841
CHMP4BL1	-	-0.0450256	0.980588	1266	1580	1051	1460
Chmp4c	charged multivesicular body protein 4C	1.00694	0.759736	53	13	10	20
Chmp5	charged multivesicular body protein 5	0.13235	0.896205	1095	1241	799	1020
Chmp6	charged multivesicular body protein 6	-0.40505	0.147707	630	653	621	838
Chmp7	charged multivesicular body protein 7	0.0014088	0.998427	660	805	522	731
Chn1	chimerin 1	0.35759	0.868127	119	86	63	75
Chn2	chimerin 2	0.818424	0.469517	98	167	50	78
Chodl	chondrolectin	1.13233	NA	27	8	7	7
Chordc1	cysteine and histidine-rich domain (CHORD)-containing, zinc-binding protein 1	-0.116303	0.955759	587	684	522	651
Chp1	calcineurin-like EF hand protein 1	0.0453481	0.986393	1853	2401	1500	2013
Chp2	calcineurin-like EF hand protein 2	-0.264975	0.825491	582	466	487	598
Chpf	chondroitin polymerizing factor	0.00298034	0.99576	1632	1747	1199	1704
Chpf2	chondroitin polymerizing factor 2	0.100095	0.959309	685.5	901	529	735
Chpt1	choline phosphotransferase 1	0.433877	0.417223	296.25	419.75	206.5	241
Chrac1	chromatin accessibility complex 1	-0.398846	0.465567	542	504	503	687
Chrd	chordin	0.277766	0.809573	246	347	169	249
Chrdl1	chordin-like 1	0.722785	0.375453	1204	1638	660	794
Chrdl2	chordin-like 2	1.54599	0.621196	36	27	11	7
Chrm4	cholinergic receptor, muscarinic 4	0.492601	NA	2	8	2	4
Chrna1	cholinergic receptor, nicotinic, alpha polypeptide 1 (muscle)	-0.37688	0.881575	69.83	48.83	57.92	75.5
Chrnb1	cholinergic receptor, nicotinic, beta polypeptide 1 (muscle)	0.5317	0.894979	87	34	32	42
Chrnb2	cholinergic receptor, nicotinic, beta polypeptide 2 (neuronal)	-0.597691	NA	3	4	4	5
Chrnd	cholinergic receptor, nicotinic, delta polypeptide	-0.875998	0.883038	34	2	33	25
Chrne	cholinergic receptor, nicotinic, epsilon polypeptide	0.548584	0.898406	53	17	16	27
Chrng	cholinergic receptor, nicotinic, gamma polypeptide	-0.859621	0.91704	8	2	3	14
Chst1	carbohydrate sulfotransferase 1	-0.493435	0.364138	155	187	185	224
Chst10	carbohydrate sulfotransferase 10	0.335578	0.934712	87	71	40	70
Chst11	carbohydrate sulfotransferase 11	0.261662	0.921006	86	118	61	84
Chst12	carbohydrate sulfotransferase 12	-0.285554	0.717109	606	959	688	927
Chst13	carbohydrate sulfotransferase 13	-0.440489	0.952088	14	8	11	15
Chst14	carbohydrate sulfotransferase 14	-0.0795564	0.980588	260	341	224	319
Chst15	carbohydrate sulfotransferase 15	0.295736	0.871764	85	119	62	79
Chst3	carbohydrate sulfotransferase 3	1.14191	NA	13	10	4	5
Chst5	carbohydrate (N-acetylglucosamine 6-O) sulfotransferase 5	-0.30928	NA	0	2	1	1
Chst7	carbohydrate (N-acetylglucosamino) sulfotransferase 7	0.807936	0.683003	41	41	23	16
Chsy1	chondroitin sulfate synthase 1	0.122414	0.958617	588	569	401	511
Chtf18	CTF18, chromosome transmission fidelity factor 18	-0.473343	0.676535	67	78.5	70	103
Chtf8	CTF8, chromosome transmission fidelity factor 8	-0.176531	0.773163	1205	1517	1043	1604
Chuk	conserved helix-loop-helix ubiquitous kinase	0.0410987	0.990854	487	606	408	493
Churc1	churchill domain containing 1	-0.593694	0.0711092	597	619	761	789
Ciao1	cytosolic iron-sulfur protein assembly 1	-0.172787	0.874974	350	434	316	440
Ciapin1	cytokine induced apoptosis inhibitor 1	0.0433439	0.989021	471	518	348	475
Ciart	circadian associated repressor of transcription	0.208736	0.934674	180	151	100	149
Cib1	calcium and integrin binding 1 (calmyrin)	-0.455519	0.16373	932	992	993	1263
Cib2	calcium and integrin binding family member 2	0.512356	0.882918	92	54	44	44
Cidea	cell death-inducing DNA fragmentation factor, alpha subunit-like effector A	0.318081	0.925479	39	59	32	34
Cideb	cell death-inducing DNA fragmentation factor, alpha subunit-like effector B	1.71714	NA	8	6	0	4
Cidec	cell death-inducing DFFA-like effector c	1.46278	0.200189	461	212	81	138
Ciita	class II transactivator	0.538902	0.194252	483	731	282	432
Cilp	cartilage intermediate layer protein, nucleotide pyrophosphohydrolase	1.922	0.0103215	940	331	133	164
Cilp2	cartilage intermediate layer protein 2	1.74574	NA	9	6	1	3
Cinp	cyclin-dependent kinase 2 interacting protein	0.160728	0.884296	358	459	283	336
Cipc	CLOCK interacting protein, circadian	0.590206	0.0308434	579	585	285	379
Cir1	corepressor interacting with RBPJ, 1	0.124097	0.93159	391	454	292	369
Cirbp	cold inducible RNA binding protein	0.253613	0.857786	435	367	237	348
CIRH1A	-	-0.0720572	0.978041	603	565	487	561
Cisd1	CDGSH iron sulfur domain 1	0.311285	0.438737	770	837	449	668
Cisd2	CDGSH iron sulfur domain 2	0.183853	0.818813	772	983	586	725
Cisd3	CDGSH iron sulfur domain 3	0.0742405	0.99024	311	315	204	311
Cish	cytokine inducible SH2-containing protein	0.157212	0.974359	136	131	92	113
Cit	citron	-0.0327068	0.99576	108	204	103	169
Cited1	Cbp/p300-interacting transactivator with Glu/Asp-rich carboxy-terminal domain 1	1.77023	NA	15	8	2	4
Cited2	Cbp/p300-interacting transactivator, with Glu/Asp-rich carboxy-terminal domain, 2	0.147192	0.945383	515	913	482	600
Cited4	Cbp/p300-interacting transactivator, with Glu/Asp-rich carboxy-terminal domain, 4	-0.094382	0.99576	54	17	34	32
Ciz1	CDKN1A interacting zinc finger protein 1	-0.145294	0.866802	510	582	432	604
Ckap2	cytoskeleton associated protein 2	0.535461	0.325703	205	296	128	165
Ckap4	cytoskeleton-associated protein 4	-0.0543329	0.991087	1786	2525	1625	2177
Ckb	creatine kinase, brain	0.0877574	0.975513	2785.5	5183	2761	3526
Cklf	chemokine-like factor	-0.998151	0.0275202	97	156	187	240
Ckm	creatine kinase, muscle	0.138819	0.990854	30914	8412	13639	18407
CKMT1B	-	-0.393525	0.978137	24	1	16	13
Ckmt2	creatine kinase, mitochondrial 2	1.39997	0.0889604	707	281	129	207
Cks1b	CDC28 protein kinase 1b	0.116948	0.943676	530	547.5	359	496
[truncated: 11,008 more rows]

## Sheet: Control vs BG
Dataset 1-2: Global gene expression changes of BG group, as compared to those of control group.
Gene symbol	Gene name	log2 FC	FDR	Control_1 count	Control_2 count	BG_1 count	BG_2 count
2021-03-01	-	1.24227	0.0902105	113	215	57	78
2021-03-01	-	0.186202	0.808561	113	215	57	78
2021-03-02	-	0.40505	0.185178	655	685	459	542
2021-03-02	-	0.4821	0.00794478	655	685	459	542
2021-03-03	-	0.123725	0.81375	257	355	234	319
2021-03-05	-	0.0509457	0.895852	527	560	491	544
2021-03-06	-	-0.101859	0.736257	1098	1242	1124	1355
2021-03-07	-	0.0562572	0.874506	528	646	509	602
2021-03-08	-	0.171279	0.562419	1402	2101	1392	1647
2021-03-09	-	-0.687354	0.364733	37	42	61	64
2021-03-10	-	-1.71029	NA	2	6	6	20
2021-09-01	-	-0.446533	0.485218	131	139	158	207
2021-09-02	-	0.493611	0.000501386	9360.5	12278	6911	8170
2021-09-03	-	0.294022	0.916836	12	7	4	12
2021-09-04	-	0.698914	0.098802	339	290	162	226.5
2021-09-05	-	0.138432	0.854319	283.5	386	277.5	317.5
2021-09-06	-	0.00541064	0.993125	364	587	429	494
2021-09-07	-	0.295192	0.083132	3587	4525	3023	3467
2021-09-08	-	0.83479	1.89e-05	2300	3445	1462	1681
2021-09-09	-	-0.302816	0.0433637	2434	2636	2874	3299
2021-09-10	-	0.600858	0.0842287	263	381	194	221
2021-09-11	-	0.0386776	0.947475	544	698	569	615
2021-09-15	-	0.123484	0.505195	5091	6037	4651	5404
A2m	alpha-2-macroglobulin	1.66296	5.55e-10	1150	1761	419	477
A3galt2	alpha 1,3-galactosyltransferase 2 (isoglobotriaosylceramide synthase)	0.257116	0.336764	1133	1203	883	1050
AA926063	-	-0.415167	0.750724	28	54	42	65
Aaas	achalasia, adrenocortical insufficiency, alacrimia	-0.562473	0.0374485	222	265	334	373
Aacs	acetoacetyl-CoA synthetase	-0.79645	0.000345595	302	362	553	578
Aaed1	-	0.729407	0.274114	63	85	28.5	61
Aagab	alpha- and gamma-adaptin binding protein	0.402105	0.265219	221	325	179	226
Aak1	AP2 associated kinase 1	0.422008	0.279526	239	361	220	215
Aamdc	adipogenesis associated Mth938 domain containing	0.148376	0.849927	162	115	102	150
Aamp	angio-associated migratory protein	0.0382502	0.915	1575.5	1807	1519.5	1724.5
Aar2	AAR2 splicing factor homolog	0.0137346	0.982563	300	278	256	313
Aard	alanine and arginine rich domain containing protein	1.86003	0.188439	13	96	14	14
Aars	alanyl-tRNA synthetase	-0.234071	0.285856	1305	1763	1683	1846
Aars2	alanyl-tRNA synthetase 2, mitochondrial	-0.314044	0.504525	131	143	149	188
Aarsd1	alanyl-tRNA synthetase domain containing 1	-0.0864546	0.896156	318	532	426	449
Aasdhppt	aminoadipate-semialdehyde dehydrogenase-phosphopantetheinyl transferase	-0.207729	0.445373	467	590	564	634
Aass	aminoadipate-semialdehyde synthase	0.77751	0.714879	36	6	15	10
Aatf	apoptosis antagonizing transcription factor	0.0579676	0.910273	255	328	246	305
Aatk	apoptosis-associated tyrosine kinase	-0.341975	0.80657	54	18	45	48
Abca1	ATP-binding cassette, sub-family A (ABC1), member 1	0.184963	0.639792	2467	1949	1758	2128
Abca13	ATP-binding cassette, sub-family A (ABC1), member 13	0.964767	0.616251	5	21	3	10
Abca17	ATP-binding cassette, sub-family A (ABC1), member 17	0.55674	0.564958	48	43	32	29
Abca2	ATP-binding cassette, sub-family A (ABC1), member 2	0.119998	0.749224	907	912	767	890
Abca4	ATP-binding cassette, sub-family A (ABC1), member 4	0.20796	0.859895	147	530	249	309
Abca5	ATP-binding cassette, sub-family A (ABC1), member 5	0.220182	0.743467	139	282	166	183
Abca7	ATP-binding cassette, sub-family A (ABC1), member 7	-0.400022	0.247716	245	324	366	367
Abca8a	ATP-binding cassette, sub-family A (ABC1), member 8a	0.889826	0.593123	1219	317	414	440
Abcb10	ATP-binding cassette, sub-family B (MDR/TAP), member 10	-0.111682	0.812606	227	294	253	300
Abcb11	ATP-binding cassette, sub-family B (MDR/TAP), member 11	0.493622	NA	7	10	4	8
Abcb1a	ATP-binding cassette, sub-family B (MDR/TAP), member 1A	-1.03667	0.21682	27.17	27.5	48.5	64.5
Abcb1b	ATP-binding cassette, sub-family B (MDR/TAP), member 1B	-0.64563	0.0668252	279.17	258.5	383.5	449.5
Abcb4	ATP-binding cassette, sub-family B (MDR/TAP), member 4	-0.929894	0.00354607	221.67	410	576	587
Abcb6	ATP-binding cassette, sub-family B (MDR/TAP), member 6	-0.265533	0.409407	376	394	407	510
Abcb7	ATP-binding cassette, sub-family B (MDR/TAP), member 7	0.327982	0.405976	218	325	209	212
Abcb8	ATP-binding cassette, sub-family B (MDR/TAP), member 8	-0.398254	0.176074	292	379	431	433
Abcb9	ATP-binding cassette, sub-family B (MDR/TAP), member 9	-0.408551	0.713935	27	37	33	51
Abcc1	ATP-binding cassette, sub-family C (CFTR/MRP), member 1	0.0278778	0.953158	868.5	986.5	867.67	919.33
Abcc10	ATP-binding cassette, sub-family C (CFTR/MRP), member 10	-0.336386	0.560766	126.5	120	112.5	199.5
Abcc3	ATP-binding cassette, sub-family C (CFTR/MRP), member 3	0.452687	0.264616	271	335	218	215
Abcc4	ATP-binding cassette, sub-family C (CFTR/MRP), member 4	-0.531593	0.0842287	207	224	292	322
Abcc5	ATP-binding cassette, sub-family C (CFTR/MRP), member 5	-0.434379	0.18676	1190.5	1178.5	1467.5	1702
Abcc8	ATP-binding cassette, sub-family C (CFTR/MRP), member 8	0.252736	NA	8	6	3	9
Abcc9	ATP-binding cassette, sub-family C (CFTR/MRP), member 9	1.90733	1.1e-10	1896	2163	484	584
Abcd1	ATP-binding cassette, sub-family D (ALD), member 1	0.29735	0.306	540	787.5	463	597
Abcd2	ATP-binding cassette, sub-family D (ALD), member 2	1.29885	0.117889	160	89	49	53
Abcd3	ATP-binding cassette, sub-family D (ALD), member 3	0.0534652	0.873579	706	762	659	736
Abcd4	ATP-binding cassette, sub-family D (ALD), member 4	-0.446876	0.294	108	127	157	157
Abce1	ATP-binding cassette, sub-family E (OABP), member 1	0.100156	0.656436	1485	1779	1361	1639
Abcf1	ATP-binding cassette, sub-family F (GCN20), member 1	-0.445929	0.0214152	1121.5	1104	1395	1608
Abcf2	ATP-binding cassette, sub-family F (GCN20), member 2	-0.0569173	0.893752	1097.5	964	998.5	1134.5
Abcf3	ATP-binding cassette, sub-family F (GCN20), member 3	-0.251107	0.273684	823	872	930	1062
Abcg1	ATP binding cassette subfamily G member 1	-0.230628	0.619793	1604	1248	1530	1817
Abcg2	ATP binding cassette subfamily G member 2 (Junior blood group)	-0.291032	0.753	77	44	69	80
Abcg3	ATP binding cassette subfamily G member 3	0.583059	0.0443686	238.67	336.58	169.58	207.42
ABCG3L1	-	0.108493	0.892457	85.78	103.11	68.5	106.33
ABCG3L2	-	0.0603203	0.896285	232.94	308.9	235.75	273.83
ABCG3L3	-	0.744447	0.0113432	364	494.92	228	275.42
ABCG3L4	-	0.0673378	0.882618	235.28	305.44	234.5	271.67
Abcg4	ATP binding cassette subfamily G member 4	0.221644	0.86193	31	31	21	32
Abhd1	abhydrolase domain containing 1	0.26337	0.633444	130.5	125	93	118.5
Abhd10	abhydrolase domain containing 10	-0.359184	0.586577	89	77	95	116.67
Abhd11	abhydrolase domain containing 11	-0.421334	0.292049	155	142	179	216
Abhd12	abhydrolase domain containing 12	0.163971	0.52828	1581	2204	1487	1826
Abhd13	abhydrolase domain containing 13	-0.511209	0.0224815	403	411	519	630
Abhd14a	abhydrolase domain containing 14A	0.340724	0.554812	146	157	119	116
Abhd14b	abhydrolase domain containing 14b	0.486362	0.18492	399	458	292	309
Abhd15	abhydrolase domain containing 15	0.156185	0.904051	29	31	26	27
Abhd16a	abhydrolase domain containing 16A	-0.0376085	0.923012	601	662	593	686
Abhd17a	abhydrolase domain containing 17A	-0.217763	0.402935	672	692	766	797
Abhd17b	abhydrolase domain containing 17B	-0.042192	0.931056	253	282	238	307
Abhd17c	abhydrolase domain containing 17C	-0.970652	0.00571169	104	143	194	284
Abhd2	abhydrolase domain containing 2	-0.0315087	0.965	376	619	470	518
Abhd3	abhydrolase domain containing 3	0.0329044	0.984983	28	40	38	26
Abhd4	abhydrolase domain containing 4	0.00267498	0.994918	1799	2253	1788	2193
Abhd5	abhydrolase domain containing 5	0.0608092	0.881506	431	520	430	465
Abhd6	abhydrolase domain containing 6	0.138399	0.786542	338	491	350	385
Abhd8	abhydrolase domain containing 8	0.338578	0.370358	262	270	208	206
Abi1	abl-interactor 1	-0.257307	0.387159	1033	1378	1293	1534
Abi2	abl-interactor 2	0.528066	0.0179952	513	651	358	436
Abi3	ABI gene family, member 3	-1.18995	0.000199568	182.5	131.5	330	385.5
Abl1	c-abl oncogene 1, non-receptor tyrosine kinase	0.570436	0.000189544	2363.5	2922.5	1610.5	1889.5
Abl2	v-abl Abelson murine leukemia viral oncogene 2 (arg, Abelson-related gene)	-0.70106	0.276253	97	77	124	159
Ablim2	actin-binding LIM protein 2	-0.708225	0.612948	107	30	116	113
Ablim3	actin binding LIM protein family, member 3	0.324915	0.59878	179	163	119	153
Abo	ABO blood group (transferase A, alpha 1-3-N-acetylgalactosaminyltransferase, transferase B, alpha 1-3-galactosyltransferase)	0.0677902	0.953282	31.5	52	38.5	39.5
Abr	active BCR-related gene	-0.459487	0.0390946	1214	1733.5	1849	2113
Abra	actin-binding Rho activating protein	0.319404	0.76301	241	90	120	152
Abracl	ABRA C-terminal like	-0.110044	0.759435	1454	2066	1729	1985
Abt1	activator of basal transcription 1	-0.125832	0.804687	243	210	223	269
Abtb1	ankyrin repeat and BTB (POZ) domain containing 1	-0.246222	0.590605	303	292	355	340
Abtb2	ankyrin repeat and BTB (POZ) domain containing 2	-0.761376	0.150094	127	97	162	219
AC1576	-	-0.368345	0.672077	36	32.22	41	46.33
Acaa1a	acetyl-Coenzyme A acyltransferase 1A	-0.264634	0.278414	540.5	625.5	651.5	726
Acaa1b	acetyl-Coenzyme A acyltransferase 1B	-0.49913	0.784502	7.5	12.5	9.5	18
Acaa2	acetyl-Coenzyme A acyltransferase 2 (mitochondrial 3-oxoacyl-Coenzyme A thiolase)	-0.438948	0.21156	1249	923	1392	1551
Acaca	acetyl-Coenzyme A carboxylase alpha	0.0972805	0.792149	507	575.5	432	570
Acacb	acetyl-Coenzyme A carboxylase beta	-0.302765	0.723159	158	76	132	161
Acad10	acyl-Coenzyme A dehydrogenase family, member 10	-0.0261413	0.975087	118.5	108.5	108.5	120.5
Acad11	acyl-Coenzyme A dehydrogenase family, member 11	0.00107456	0.999016	382.5	692	503	535
Acad9	acyl-Coenzyme A dehydrogenase family, member 9	-0.231843	0.332694	535	648	615	754
Acadl	acyl-Coenzyme A dehydrogenase, long-chain	-0.367918	0.0955335	950	1046	1155	1390
Acadm	acyl-Coenzyme A dehydrogenase, medium chain	0.172761	0.657108	1214	1168	980	1114
Acads	acyl-Coenzyme A dehydrogenase, short chain	-0.163503	0.649545	456	563	554	563
Acadsb	acyl-Coenzyme A dehydrogenase, short/branched chain	0.823476	0.00872854	194	225.5	106	128
Acadvl	acyl-Coenzyme A dehydrogenase, very long chain	-0.213291	0.384704	1242.5	1202	1343.5	1458
Acan	aggrecan	0.36475	0.927504	194	53	98	99
Acap1	ArfGAP with coiled-coil, ankyrin repeat and PH domains 1	-1.10023	0.00074	167	228	397	431
Acap2	ArfGAP with coiled-coil, ankyrin repeat and PH domains 2	0.378378	0.191576	793	1225	695	820
Acap3	ArfGAP with coiled-coil, ankyrin repeat and PH domains 3	0.121603	0.733767	645	925	628	787
Acat1	acetyl-Coenzyme A acetyltransferase 1	-0.0592639	0.84265	1251	1366	1277	1410
Acat2	acetyl-Coenzyme A acetyltransferase 2	-0.959221	0.00302515	112	151	235.5	265
Acbd3	acyl-Coenzyme A binding domain containing 3	-0.0755249	0.853139	562	766	621	752
Acbd4	acyl-Coenzyme A binding domain containing 4	0.166979	0.737413	161	191	148	160
Acbd5	acyl-Coenzyme A binding domain containing 5	0.254734	0.420487	366.33	507.67	328.17	390
Acbd6	acyl-Coenzyme A binding domain containing 6	0.0349879	0.944817	333	316	290	338
Accs	1-aminocyclopropane-1-carboxylate synthase (non-functional)	0.517695	0.180662	153	200	112	130
Accsl	1-aminocyclopropane-1-carboxylate synthase (non-functional)-like	-0.443329	0.894656	7	2	2	11
Acd	adrenocortical dysplasia	-0.309778	0.19586	425	476	497	606
Ace	angiotensin I converting enzyme (peptidyl-dipeptidase A) 1	1.93802	1.84e-24	2016	3142	622	688
Ace2	angiotensin I converting enzyme (peptidyl-dipeptidase A) 2	-2.07544	0.0248203	32	16	97	107
Acer1	alkaline ceramidase 1	-3.24953	1.18e-05	26	11	177.5	176
Acer2	alkaline ceramidase 2	0.0131603	0.99309	131.5	63.25	76	122
Ache	acetylcholinesterase	0.603998	0.600305	217	78	110	86
Acin1	apoptotic chromatin condensation inducer 1	-0.112385	0.639463	1403.5	1631	1527.75	1699
Ackr2	atypical chemokine receptor 2	1.07335	0.0805426	136	123	51	72
Ackr3	atypical chemokine receptor 3	1.06376	0.000563057	6115	4910.5	2437.5	2828
Acly	ATP citrate lyase	-0.00361086	0.993638	1520	2230	1731	1937
Aco1	aconitase 1	0.426891	0.0521754	1652	2319	1359	1528
Aco2	aconitase 2, mitochondrial	-0.0395027	0.897371	5638.65	5626.7	5285.45	6186.67
Acot1	acyl-CoA thioesterase 1	0.291879	0.868097	21	17.83	12	20
Acot11	acyl-CoA thioesterase 11	0.266235	0.721206	68.5	96.5	58.5	76.5
Acot13	acyl-CoA thioesterase 13	0.151948	0.864469	175	113	123	137
Acot2	acyl-CoA thioesterase 2	0.147541	0.821543	115	137.17	103	121
Acot3	acyl-CoA thioesterase 3	0.590155	0.310134	74.5	111.5	61.5	58
Acot7	acyl-CoA thioesterase 7	-0.587318	0.00784483	414	535	667	730
Acot8	acyl-CoA thioesterase 8	0.0620207	0.909397	188	192.5	166	194
Acot9	acyl-CoA thioesterase 9	-0.0267949	0.945354	878	1160	923	1116
Acox1	acyl-Coenzyme A oxidase 1, palmitoyl	-0.096508	0.777141	575.5	658.5	604.5	695.5
Acox2	acyl-Coenzyme A oxidase 2, branched chain	0.396557	NA	8	5	4	6
Acox3	acyl-Coenzyme A oxidase 3, pristanoyl	0.337068	0.17555	558	739	459	549
Acoxl	acyl-Coenzyme A oxidase-like	-1.96073	NA	2	2	10	5
Acp1	acid phosphatase 1, soluble	-0.00926956	0.981912	1096	1309	1061	1327
Acp2	acid phosphatase 2, lysosomal	0.208337	0.294066	1565	1687.5	1247.5	1537.5
Acp5	acid phosphatase 5, tartrate resistant	-2.88903	7.32e-51	632	903	5198	5916
Acp6	acid phosphatase 6, lysophosphatidic	-0.582722	0.124691	200	200	295	295
Acpp	acid phosphatase, prostate	-2.1074	0.000256182	101	73	349	401
ACPT	-	-0.845434	0.472454	22	15	27	40
Acrbp	proacrosin binding protein	-1.15544	0.158408	31	24	50	73
Acsbg1	acyl-CoA synthetase bubblegum family member 1	-3.37843	0.098	63	5	379	359
Acsf2	acyl-CoA synthetase family member 2	0.235174	0.563642	438	386	329	366
Acsl1	acyl-CoA synthetase long-chain family member 1	0.620901	0.176445	1255	976	690	757
Acsl3	acyl-CoA synthetase long-chain family member 3	-0.415827	0.204779	417	376	513	534
Acsl4	acyl-CoA synthetase long-chain family member 4	0.00339944	0.99511	792	1106	887	962
Acsl5	acyl-CoA synthetase long-chain family member 5	-0.129726	0.707975	1852	2756.5	2280	2642
Acsl6	acyl-CoA synthetase long-chain family member 6	0.483946	0.658514	92	54	50	55
Acsm1	acyl-CoA synthetase medium-chain family member 1	-2.73111	NA	3	2	16	17
Acsm3	acyl-CoA synthetase medium-chain family member 3	-2.18342	0.000447076	72	51.5	283	277
Acss1	acyl-CoA synthetase short-chain family member 1	0.562933	0.190542	221	245	138	174
Acss2	acyl-CoA synthetase short-chain family member 2	0.246444	0.454697	503	518	417	431
Acss3	acyl-CoA synthetase short-chain family member 3	1.77023	0.00919045	115	245.5	48	54
Acta1	actin, alpha 1, skeletal muscle	0.0304629	0.983333	66151	23514	41776	48235
Acta2	actin, alpha 2, smooth muscle, aorta	1.21874	0.00598418	1977	2887	973	1064
Actb	actin, beta	0.347704	0.083	55781	81866.5	49366.5	56194
Actbl2	actin, beta-like 2	-4.08917	0.0848577	31	1	275	299
Actc1	actin, alpha, cardiac muscle 1	-3.18436	0.0112298	276	46	1431	1617
Actg1	actin, gamma, cytoplasmic 1	0.034722	0.905196	49200.7	66455	51037.3	59584.5
Actg2	actin, gamma 2, smooth muscle, enteric	1.27381	0.00262897	230	204	78	101
Actl6a	actin-like 6A	-0.165733	0.59772	419	452.5	451	513
Actn1	actinin, alpha 1	0.144124	0.846449	1051	1373	1050.5	1093
Actn2	actinin alpha 2	-0.745045	0.254238	1934	666	2089	2379
Actn3	actinin alpha 3	1.00413	0.26334	19502.5	6323	6179	7049
Actn4	actinin alpha 4	-0.128487	0.768682	4068.5	5440.5	4741	5440.5
Actr10	ARP10 actin-related protein 10	0.124217	0.603	1224	1341	1094	1226
Actr1a	ARP1 actin-related protein 1A, centractin alpha	-0.00626935	0.983333	2630	3132	2632	3064
Actr1b	ARP1 actin-related protein 1B, centractin beta	0.1128	0.692691	1204	1256	1056	1191
Actr2	ARP2 actin-related protein 2	0.38385	0.160162	2427	3882	2123	2594
Actr3	ARP3 actin-related protein 3	-0.09805	0.776494	5672	8352	6735	7931
Actr3b	ARP3 actin-related protein 3B	0.786968	0.441582	45	47	22	31
Actr5	ARP5 actin-related protein 5	-0.394909	0.491072	90	90	102	133
Actr6	ARP6 actin-related protein 6	-0.208406	0.544335	234	268	261	311
Actr8	ARP8 actin-related protein 8	0.0364729	0.935167	323	421	321.5	391
Acvr1	activin A receptor, type 1	0.297803	0.502296	229	260	190	201
Acvr1b	activin A receptor, type 1B	-0.212465	0.681433	261	291	291	340
Acvr1c	activin A receptor, type IC	4.79327	NA	10	19	1	0
Acvr2a	activin receptor IIA	-0.0690723	0.895	220	260	235	260
Acvr2b	activin receptor IIB	-0.22337	0.906865	14	11	14	15
Acvrl1	activin A receptor, type II-like 1	0.835478	1.07e-05	1536	2183	979.5	1053
Acy1	aminoacylase 1	-0.433175	0.119385	519	473	643	683
Acy3	aspartoacylase (aminoacylase) 3	-1.09864	0.00187344	240	192	437	484
Acyp1	acylphosphatase 1, erythrocyte (common) type	-0.315371	0.529449	133	145	161	180
Acyp2	acylphosphatase 2, muscle type	0.654941	0.29591	255	150	129	129
Ada	adenosine deaminase	-0.0520328	0.896751	418	534	443	527
Adal	adenosine deaminase-like	-0.0396629	0.968276	62	62	59	67
Adam10	a disintegrin and metallopeptidase domain 10	0.234237	0.366773	920	1305	881	966
Adam11	a disintegrin and metallopeptidase domain 11	0.244521	0.897123	50	15	21	35.5
Adam15	a disintegrin and metallopeptidase domain 15 (metargidin)	0.204218	0.491072	2017	2454	1808	2001.5
Adam17	a disintegrin and metallopeptidase domain 17	0.0190145	0.952799	1770	2327	1820	2148
Adam19	a disintegrin and metallopeptidase domain 19 (meltrin beta)	0.38674	0.340084	2086	3562	1946	2250
Adam1a	a disintegrin and metallopeptidase domain 1a	-0.498235	0.607633	67	32	62	80
Adam23	a disintegrin and metallopeptidase domain 23	0.246757	0.699933	180	438	230	271
Adam32	a disintegrin and metallopeptidase domain 32	-1.90587	NA	3	1	8	7
Adam4	a disintegrin and metallopeptidase domain 4	-1.14503	0.517317	6.5	6	14.5	11.5
ADAM4L1	-	-0.233456	0.887019	20.5	14	18.5	21.5
Adam9	a disintegrin and metallopeptidase domain 9 (meltrin gamma)	0.718866	1.53e-06	2542	3034	1583	1745
Adamts1	a disintegrin-like and metallopeptidase (reprolysin type) with thrombospondin type 1 motif, 1	0.472088	0.106438	677	578	407	495
Adamts10	a disintegrin-like and metallopeptidase (reprolysin type) with thrombospondin type 1 motif, 10	0.366338	0.137966	943	886	657	750
Adamts12	a disintegrin-like and metallopeptidase (reprolysin type) with thrombospondin type 1 motif, 12	0.909203	2.15e-14	3946	4307	1996.5	2344
Adamts14	a disintegrin-like and metallopeptidase (reprolysin type) with thrombospondin type 1 motif, 14	-0.368188	0.648245	242	279	330	329
Adamts15	a disintegrin-like and metallopeptidase (reprolysin type) with thrombospondin type 1 motif, 15	0.232003	0.554545	1262	1045	902	1057
Adamts18	a disintegrin-like and metallopeptidase (reprolysin type) with thrombospondin type 1 motif, 18	-0.262984	0.902987	67	17	48	56
Adamts19	a disintegrin-like and metallopeptidase (reprolysin type) with thrombospondin type 1 motif, 19	0.150797	0.921273	21	22	20	18
Adamts2	a disintegrin-like and metallopeptidase (reprolysin type) with thrombospondin type 1 motif, 2	0.82749	1.01e-06	2610.5	3085.5	1507	1646
Adamts3	a disintegrin-like and metallopeptidase (reprolysin type) with thrombospondin type 1 motif, 3	-1.44856	0.220713	13	6	26	26
Adamts4	a disintegrin-like and metallopeptidase (reprolysin type) with thrombospondin type 1 motif, 4	-0.297742	0.554545	118.5	135	130	178
Adamts5	a disintegrin-like and metallopeptidase (reprolysin type) with thrombospondin type 1 motif, 5 (aggrecanase-2)	1.43134	0.000367738	569	1149	281	335
Adamts7	a disintegrin-like and metallopeptidase (reprolysin type) with thrombospondin type 1 motif, 7	-0.284626	0.328844	487	493	583	593
Adamts9	a disintegrin-like and metallopeptidase (reprolysin type) with thrombospondin type 1 motif, 9	0.85203	0.047976	471	314	207	229
Adamtsl3	ADAMTS-like 3	0.95624	0.509029	37	21	15	15
Adamtsl4	ADAMTS-like 4	0.965051	9.85e-09	1835	2488	1014	1154
Adamtsl5	ADAMTS-like 5	0.317393	0.385773	255	358.5	227.5	253
Adap1	ArfGAP with dual PH domains 1	-0.59698	0.148801	108	205	216	243
Adap2	ArfGAP with dual PH domains 2	0.215726	0.687219	211	239	199	180
Adar	adenosine deaminase, RNA-specific	0.478955	0.197844	785	1132	612	734
Adarb1	adenosine deaminase, RNA-specific, B1	1.02259	2.75e-09	757	906	377	428
Adat1	adenosine deaminase, tRNA-specific 1	0.173382	0.859766	60	71	40	76
Adat2	adenosine deaminase, tRNA-specific 2	0.160741	0.86978	44	61	43	49
Adat3	adenosine deaminase, tRNA-specific 3	-0.260791	0.736322	59	71	73	80
Adck1	aarF domain containing kinase 1	0.107246	0.894871	89	90	63	103
Adck2	aarF domain containing kinase 2	-0.0263719	0.962908	212	224	208	230
ADCK3	-	0.35789	0.65287	1441	537	744	834
ADCK4	-	-0.226491	0.640838	302	238	322	304
Adck5	aarF domain containing kinase 5	-0.358083	0.302586	220	223	271.5	288
Adcy1	adenylate cyclase 1	-1.15364	0.613883	8	6	15	16
Adcy10	adenylate cyclase 10	-0.707721	0.632967	7	31.5	39	20
Adcy2	adenylate cyclase 2	0.392196	0.523369	143	293	150	171
Adcy3	adenylate cyclase 3	0.518526	0.0635955	421	565	318	356
Adcy4	adenylate cyclase 4	0.0256901	0.964308	451	733	536	595
Adcy5	adenylate cyclase 5	0.598279	0.0507798	211	250	128	173
Adcy6	adenylate cyclase 6	0.37756	0.11944	776	903	553	725
Adcy7	adenylate cyclase 7	0.197313	0.743127	794	1859	1040	1183
Adcy8	adenylate cyclase 8	-5.19732	NA	1	0	15	22
Adcyap1r1	adenylate cyclase activating polypeptide 1 receptor 1	-2.03945	0.0108097	40	40	141	186
Add1	adducin 1 (alpha)	0.371582	0.017359	3358.5	4316	2705	3115
Add2	adducin 2 (beta)	1.18476	0.271072	34	51	13	24
Add3	adducin 3 (gamma)	1.25667	1.43e-08	2719	4338	1358	1514
Adgrb2	adhesion G protein-coupled receptor B2	0.655672	0.648979	37	17	14	21
Adgre1	adhesion G protein-coupled receptor E1	1.28511	0.000320835	1990	2418	828	950
Adgre5	adhesion G protein-coupled receptor E5	-0.251843	0.3861	2487	3443	3265	3636
Adgrf5	adhesion G protein-coupled receptor F5	1.43808	1.7e-10	1681	1406	508	630
Adgrg1	adhesion G protein-coupled receptor G1	-1.00758	0.0526871	716	379	1063	1161
Adgrg2	adhesion G protein-coupled receptor G2	0.750069	0.272018	99	142	66	74
Adgrg5	adhesion G protein-coupled receptor G5	-0.57507	0.342256	102	151	159	211
Adgrg7	adhesion G protein-coupled receptor G7	1.06592	0.477571	11	19	6	8
Adgrl1	adhesion G protein-coupled receptor L1	-0.0640635	0.91725	285	412	340	371
Adgrl2	adhesion G protein-coupled receptor L2	-0.053937	0.9048	510	479	460	560
Adgrl3	adhesion G protein-coupled receptor L3	-0.462345	0.8191	5	10	10	10
Adgrl4	adhesion G protein-coupled receptor L4	1.15629	2.44e-06	1271	998	462	556
Adh1	alcohol dehydrogenase 1 (class I)	-0.0908361	0.955194	56	27	45	44
Adh5	alcohol dehydrogenase 5 (class III), chi polypeptide	0.269248	0.268	1236	1301	988	1089
Adh6a	alcohol dehydrogenase 6A (class V)	-3.18384	0.0090862	11	3	58	72
Adh7	alcohol dehydrogenase 7 (class IV), mu or sigma polypeptide	2.09646	8.39e-07	136	141	30	34
Adhfe1	alcohol dehydrogenase, iron containing, 1	0.580333	0.634588	63	28	27	35
Adi1	acireductone dioxygenase 1	-0.216737	0.639463	168	230	197	258
Adipoq	adiponectin, C1Q and collagen domain containing	2.32014	0.0991837	1395	1069	219	276
Adipor1	adiponectin receptor 1	-0.156759	0.525321	2673	2953	2870	3317.5
Adipor2	adiponectin receptor 2	-0.194912	0.529	468	525	525	595
Adk	adenosine kinase	0.557168	0.020768	927	1249	693	753
Adm	adrenomedullin	1.56355	0.00288311	148	374	75	95
Adm2	adrenomedullin 2	-2.09474	NA	0	4	8	8
Adnp	activity-dependent neuroprotective protein	-0.0895225	0.755647	1054	1197	1058	1308.5
Adnp2	ADNP homeobox 2	0.0997148	0.825488	257	318	256	270
Ado	2-aminoethanethiol (cysteamine) dioxygenase	-0.219491	0.76028	59	79	70	88
Adora1	adenosine A1 receptor	1.0742	0.658608	14	5	6	3
Adora2a	adenosine A2a receptor	0.539121	0.399351	112	210	113	100
Adora2b	adenosine A2b receptor	0.600796	0.2718	114	181	93	96
Adora3	adenosine A3 receptor	1.24547	0.249526	19.5	33.5	12.5	9.5
Adpgk	ADP-dependent glucokinase	-0.106981	0.741138	512.5	620	535	667
Adprh	ADP-ribosylarginine hydrolase	0.113115	0.72998	540	561	468	538
Adprhl1	ADP-ribosylhydrolase like 1	-0.887731	0.515264	49.5	13.5	74	45
Adprhl2	ADP-ribosylhydrolase like 2	-0.48571	0.032055	362	439	528	573
Adprm	ADP-ribose/CDP-alcohol diphosphatase, manganese dependent	0.00464792	0.993638	273	346	304	299
Adra1a	adrenergic receptor, alpha 1a	0.140461	0.948568	12	17	10	16
Adra1b	adrenergic receptor, alpha 1b	1.1461	0.533384	8	23	10	3
Adra1d	adrenergic receptor, alpha 1d	-0.875221	0.590269	5	19	20	22
Adra2a	adrenergic receptor, alpha 2a	0.980281	0.112656	112	85	44	56
Adra2b	adrenergic receptor, alpha 2b	1.98738	NA	17	6	2	4
Adrb2	adrenergic receptor, beta 2	0.081614	0.925066	174	145	162	135
Adrb3	adrenergic receptor, beta 3	0.977838	0.731189	8	10	4	5
ADRBK1	-	-0.0817627	0.775952	1088	1398	1221	1358
ADRBK2	-	-0.453621	0.425541	116	248	240.5	239
Adrm1	adhesion regulating molecule 1	-0.639659	0.00116858	637	681	974	1049
Adsl	adenylosuccinate lyase	0.0150417	0.979409	588	490	476	589
Adss	adenylosuccinate synthetase, non muscle	-0.166761	0.535142	1332	1858	1621	1884
Adtrp	androgen dependent TFPI regulating protein	-2.22875	0.0200969	22	12	77	83
Aebp1	AE binding protein 1	0.829904	1.35e-08	12190	16636	7635	8200.5
Aebp2	AE binding protein 2	-0.249061	0.686306	94	169	139	165
Aen	apoptosis enhancing nuclease	-0.356435	0.328969	259	366.5	378	403
Aes	-	0.193269	0.260164	3505	4025	2896	3610
Afap1	actin filament associated protein 1	0.574599	0.289	233	433	197	237
Afap1l1	actin filament associated protein 1-like 1	0.678188	0.138346	382	251	165	235
Afap1l2	actin filament associated protein 1-like 2	-0.766432	0.127199	281.5	161	365.5	392.5
Aff1	AF4/FMR2 family, member 1	0.04615	0.928	339	413	363	349
Aff3	AF4/FMR2 family, member 3	0.81762	0.0594493	129	191	86	91
Aff4	AF4/FMR2 family, member 4	0.223075	0.276448	1569	2071	1424	1633
Afg3l1	AFG3-like AAA ATPase 1	-0.150309	0.687219	403	579	508	556
Afg3l2	AFG3-like AAA ATPase 2	-0.503043	0.015953	536	604	751	840
Afmid	arylformamidase	-0.605485	0.329461	60.81	54.64	81.78	92.52
Aftph	aftiphilin	-0.194124	0.457529	712	959	901	968
Aga	aspartylglucosaminidase	0.395236	0.0744019	1287	1652	1019	1174
Agap1	ArfGAP with GTPase domain, ankyrin repeat and PH domain 1	-0.069833	0.866421	643	662	597	762
Agap2	ArfGAP with GTPase domain, ankyrin repeat and PH domain 2	-0.304396	0.620688	86	126	134	120
Agap3	ArfGAP with GTPase domain, ankyrin repeat and PH domain 3	-0.2947	0.151912	796	1024	1040	1148
Agbl5	ATP/GTP binding protein-like 5	-0.243039	0.822226	38	48	31	71
Ager	advanced glycosylation end product-specific receptor	0.223631	0.786542	63	64	46	62
Agfg1	ArfGAP with FG repeats 1	0.236055	0.260213	1318	1684	1127	1380
Agfg2	ArfGAP with FG repeats 2	0.676951	0.11062	219	251.5	144	145
Agk	acylglycerol kinase	-0.00838134	0.989	265	320	267	312
Agl	amylo-1,6-glucosidase, 4-alpha-glucanotransferase	0.43808	0.451371	3350	1522	1652	2015
Agmat	agmatine ureohydrolase (agmatinase)	-1.79712	0.105832	9	14	37	41
Agmo	alkylglycerol monooxygenase	1.23337	0.0790564	160	85	44	62
Ago1	argonaute RISC catalytic subunit 1	-0.102057	0.791508	315	386	334	407
Ago2	argonaute RISC catalytic subunit 2	-0.332719	0.488761	142	189	181	229
Ago3	argonaute RISC catalytic subunit 3	0.444731	0.503211	65	73	46	54
Ago4	argonaute RISC catalytic subunit 4	0.373607	0.559385	76	71.5	53.5	59
Agpat1	1-acylglycerol-3-phosphate O-acyltransferase 1 (lysophosphatidic acid acyltransferase, alpha)	0.10508	0.716957	1036.5	1191	945.5	1093.5
Agpat2	1-acylglycerol-3-phosphate O-acyltransferase 2 (lysophosphatidic acid acyltransferase, beta)	-0.496106	0.321815	140	110	174	176
Agpat3	1-acylglycerol-3-phosphate O-acyltransferase 3	-0.4388	0.236933	328	335	446	438
Agpat4	1-acylglycerol-3-phosphate O-acyltransferase 4 (lysophosphatidic acid acyltransferase, delta)	-0.0210492	0.954716	808	845	752	908
Agpat5	1-acylglycerol-3-phosphate O-acyltransferase 5 (lysophosphatidic acid acyltransferase, epsilon)	-0.182464	0.64834	363	493	419	536
AGPAT6	-	0.145682	0.500938	1261	1458	1102	1322
AGPAT9	-	-0.109226	0.889234	89	76	89	87
Agps	alkylglycerone phosphate synthase	0.311916	0.493067	322	550	295	391
Agr2	anterior gradient 2	0.888289	NA	10	2	1	6
Agrn	agrin	0.357673	0.162945	1201	1519	983	1099
Agrp	agouti related neuropeptide	0.279404	NA	4	12	3	9.5
Agt	angiotensinogen (serpin peptidase inhibitor, clade A, member 8)	1.56529	0.0493239	584	312	152	153
Agtpbp1	ATP/GTP binding protein 1	0.368558	0.374831	630	571.5	441.5	481
Agtr1a	angiotensin II receptor, type 1a	1.74988	1.72e-05	1479	2124	459	592
Agtr2	angiotensin II receptor, type 2	5.02231	0.0410276	25	7	1	0
Agtrap	angiotensin II, type I receptor-associated protein	0.184745	0.573472	381	489	360	390
Agxt	alanine-glyoxylate aminotransferase	1.13358	0.692062	1	6	2	1
Ahctf1	AT hook containing transcription factor 1	0.18696	0.336384	1211.5	1468	1070	1245.5
Ahcy	S-adenosylhomocysteine hydrolase	-0.0940954	0.798097	1029	1174	1084	1232
Ahcyl1	S-adenosylhomocysteine hydrolase-like 1	0.0303711	0.933208	2308	3128.5	2428.5	2783.5
Ahcyl2	S-adenosylhomocysteine hydrolase-like 2	-0.278558	0.365923	353	454	431	532
Ahdc1	AT hook, DNA binding motif, containing 1	0.485232	0.0658699	382	494	310	301
Ahi1	Abelson helper integration site 1	0.202136	0.661969	209.5	253.75	182	215.25
Ahnak	AHNAK nucleoprotein (desmoyokin)	0.456754	0.0208232	30690.9	41639.9	23965.9	27637.9
Ahr	aryl-hydrocarbon receptor	0.584435	0.0163544	834	781	479	592
Ahrr	aryl-hydrocarbon receptor repressor	-1.52832	0.0856355	15	12	39	38
Ahsa1	AHA1, activator of heat shock protein ATPase 1	-0.229498	0.476499	1275	1331	1431	1585
Ahsa2	AHA1, activator of heat shock protein ATPase 2	-0.394561	0.137423	462	484.5	562.5	668
AHSP	-	1.30589	0.159687	66	64	25	27
Aida	axin interactor, dorsalization associated	0.529786	0.0257606	1911	2870	1497	1735
Aif1	allograft inflammatory factor 1	0.436497	0.00598	2838	3720	2125	2639
Aif1l	allograft inflammatory factor 1-like	0.762938	0.116546	315	684	260	308
Aifm1	apoptosis-inducing factor, mitochondrion-associated 1	-0.213528	0.563784	508	738	663	748
Aifm2	apoptosis-inducing factor, mitochondrion-associated 2	0.560065	0.0204366	398	476	249	337
Aifm3	apoptosis-inducing factor, mitochondrion-associated 3	-0.320595	0.854592	14	12	17	15
Aig1	androgen-induced 1	-0.389677	0.244016	394	593	555	712
Aimp1	aminoacyl tRNA synthetase complex-interacting multifunctional protein 1	-0.182027	0.525787	470	524	494	621
Aimp2	aminoacyl tRNA synthetase complex-interacting multifunctional protein 2	-0.272977	0.299107	491	507	561	629.5
Aip	aryl-hydrocarbon receptor-interacting protein	-0.0579523	0.864451	518	628	532	643
Ajuba	ajuba LIM protein	-0.573254	0.235427	215	201	292	321
Ak1	adenylate kinase 1	0.334016	0.558255	1917	1080	1106.5	1297.5
Ak2	adenylate kinase 2	-0.55008	0.00185459	717	871	1051	1237
Ak3	adenylate kinase 3	0.731715	7.95e-05	1399	1884.5	871	1070
Ak4	adenylate kinase 4	0.110483	0.932502	47	82	55	61
Ak6	adenylate kinase 6	-0.224887	0.50131	409	527.83	489.5	586.5
Akap1	A kinase (PRKA) anchor protein 1	0.274574	0.422597	426	551	365	428
Akap10	A kinase (PRKA) anchor protein 10	0.0137154	0.976208	455	604	453	579
Akap11	A kinase (PRKA) anchor protein 11	0.331658	0.0834091	868	1048	699	798
Akap12	A kinase (PRKA) anchor protein (gravin) 12	1.0159	0.000317479	1613	1917	789	930
Akap13	A kinase (PRKA) anchor protein 13	0.178583	0.577196	3037	4092.5	2813	3365
Akap14	A kinase (PRKA) anchor protein 14	-1.41008	0.409187	2	7	11	12
AKAP17A	-	-0.255862	0.423127	480	484	542	595
Akap2	-	0.420559	0.36317	964	829.5	615	720
Akap3	A kinase (PRKA) anchor protein 3	-0.561868	0.791316	4	10	9	11
Akap5	A kinase (PRKA) anchor protein 5	-0.033949	NA	6	7	7	6
Akap6	A kinase (PRKA) anchor protein 6	-0.529326	0.458233	187	97	196	218
Akap7	A kinase (PRKA) anchor protein 7	0.867895	0.170912	50	67	28	35
Akap8	A kinase (PRKA) anchor protein 8	-0.31073	0.140102	946	958	1067	1272
Akap8l	A kinase (PRKA) anchor protein 8-like	0.0349742	0.935167	415	487	378	492
Akap9	A kinase (PRKA) anchor protein (yotiao) 9	0.221012	0.445413	1044	1357	923	1100
Akip1	A kinase (PRKA) interacting protein 1	-0.0124373	0.98495	157.5	207.88	162	200.75
Akirin1	akirin 1	-0.0764301	0.826101	701	837	738	858
Akirin2	akirin 2	-0.280108	0.328431	532	526	597	674
Akna	AT-hook transcription factor	-0.0736981	0.829232	456	509	468	533
Aknad1	AKNA domain containing 1	-0.163197	0.884841	43	54	55	51
Akr1a1	aldo-keto reductase family 1, member A1 (aldehyde reductase)	-0.151015	0.494398	10751	12689	11773.3	13862
AKR1B1	-	0.113605	0.636366	3279	3685	2811	3556
Akr1b10	aldo-keto reductase family 1, member B10 (aldose reductase)	-2.01237	5.45e-30	198.67	199.83	717.67	875.75
Akr1b8	aldo-keto reductase family 1, member B8	-2.25357	1.76e-93	1238.83	1523	5939.83	7017.75
Akr1c12	aldo-keto reductase family 1, member C12	-0.00833991	0.998165	17	4	8.5	14.5
Akr1c13	aldo-keto reductase family 1, member C13	-0.932177	0.66889	10	3.5	6	21.5
Akr1c14	aldo-keto reductase family 1, member C14	0.84116	0.0581023	1700	1676	822	1052
Akr1c19	aldo-keto reductase family 1, member C19	0.463255	0.684053	152	60	72	85
AKR1C2	-	-2.81887	NA	1	1	6	8
AKR1C3	-	0.32745	0.599	57	96	54	65
Akr1cl	aldo-keto reductase family 1, member C-like	-0.0625926	0.966096	92	62	77	84
AKR1E2	-	0.369568	0.582343	136	124	91	109
AKR7A2	-	0.148147	0.667325	773	777.5	686	693
AKR7A3	-	-0.312583	0.903353	4	5	5	6
Akt1	thymoma viral proto-oncogene 1	0.163765	0.513042	1910	2578	1867	2051
Akt1s1	AKT1 substrate 1 (proline-rich)	-0.103673	0.814595	657	562	629	671
Akt2	thymoma viral proto-oncogene 2	0.50209	0.00116167	1476	1807	1028	1255
Akt3	thymoma viral proto-oncogene 3	0.519458	0.217152	207	231	127	176
Aktip	thymoma viral proto-oncogene 1 interacting protein	-0.143197	0.618094	609	700.5	655	770.5
Alad	aminolevulinate, delta-, dehydratase	0.287945	0.363364	335	396	284	304
Alas1	aminolevulinic acid synthase 1	-0.515172	0.021266	636	868	967	1140
Alas2	aminolevulinic acid synthase 2, erythroid	1.49538	0.164583	931	939	296	362
Alb	albumin	-0.407288	0.91725	6	3	6	6
Alcam	activated leukocyte cell adhesion molecule	0.0997397	0.948903	714	3007	1548	1730
Aldh16a1	aldehyde dehydrogenase 16 family, member A1	-0.361184	0.0656567	923	1146	1236	1371.5
Aldh18a1	aldehyde dehydrogenase 18 family, member A1	0.577384	0.00660406	1519	2015	1115	1201
Aldh1a1	aldehyde dehydrogenase family 1, subfamily A1	0.793505	0.292593	569	184.5	208.5	238
Aldh1a2	aldehyde dehydrogenase family 1, subfamily A2	1.27022	0.329461	26	23	11	9
Aldh1a3	aldehyde dehydrogenase family 1, subfamily A3	0.0131142	0.993125	110	536	265	341
Aldh1a7	aldehyde dehydrogenase family 1, subfamily A7	-3.14573	0.0834091	1	3.5	9.5	34
Aldh1l1	aldehyde dehydrogenase 1 family, member L1	-0.231368	0.856498	72	28	52	68
Aldh1l2	aldehyde dehydrogenase 1 family, member L2	1.20209	2.26e-08	1477	2188	683	878
Aldh2	aldehyde dehydrogenase 2, mitochondrial	-0.297639	0.0737615	1721	1865	2068	2276
Aldh3a1	aldehyde dehydrogenase family 3, subfamily A1	1.54167	8.02e-07	226	215	71	79
Aldh3a2	aldehyde dehydrogenase family 3, subfamily A2	0.401457	0.108	738	1052	632	691
Aldh3b1	aldehyde dehydrogenase 3 family, member B1	-1.52776	4.08e-09	270	294	731	876
Aldh4a1	aldehyde dehydrogenase 4 family, member A1	-0.53568	0.0913932	284	254	377	395
Aldh5a1	aldhehyde dehydrogenase family 5, subfamily A1	-0.791839	0.122373	127	86	181	187
Aldh6a1	aldehyde dehydrogenase family 6, subfamily A1	0.658244	0.0201387	785	711	442.5	499
Aldh7a1	aldehyde dehydrogenase family 7, member A1	0.631087	0.000245745	1140	1400	771	838
Aldh8a1	aldehyde dehydrogenase 8 family, member A1	1.44174	0.315831	17	21	4	10
Aldh9a1	aldehyde dehydrogenase 9, subfamily A1	0.465541	0.0228448	1195	1690.17	966.83	1073.5
Aldoa	aldolase A, fructose-bisphosphate	0.0712892	0.903017	37581.5	23338.5	27095	31325
Aldoc	aldolase C, fructose-bisphosphate	-0.299374	0.606603	96	155	141	160
Alg1	asparagine-linked glycosylation 1 (beta-1,4-mannosyltransferase)	0.115032	0.81594	223.5	229.5	179.5	236.5
ALG10	-	-0.179629	0.731955	180	214	205	234
Alg11	asparagine-linked glycosylation 11 (alpha-1,2-mannosyltransferase)	0.335271	0.328969	275	279	188	248
Alg12	asparagine-linked glycosylation 12 (alpha-1,6-mannosyltransferase)	-0.299182	0.43361	207	233	223	314
Alg13	asparagine-linked glycosylation 13	-0.0687015	0.902033	234	242	225	269
Alg14	asparagine-linked glycosylation 14	0.289794	0.445413	501	504	368	447
Alg2	asparagine-linked glycosylation 2 (alpha-1,3-mannosyltransferase)	0.219471	0.508704	409	500	346	423
Alg3	asparagine-linked glycosylation 3 (alpha-1,3-mannosyltransferase)	-0.123971	0.729048	336	428	369	450
Alg5	asparagine-linked glycosylation 5 (dolichyl-phosphate beta-glucosyltransferase)	0.458425	0.0323403	846	1153	626	804
Alg6	asparagine-linked glycosylation 6 (alpha-1,3,-glucosyltransferase)	0.4038	0.27316	251	365	198	259
Alg8	asparagine-linked glycosylation 8 (alpha-1,3-glucosyltransferase)	0.320613	0.437895	204.5	255	153	210
Alg9	asparagine-linked glycosylation 9 (alpha 1,2 mannosyltransferase)	-0.191778	0.56502	292	337	326	382
Alk	anaplastic lymphoma kinase	0.821845	NA	5	6	4	2
Alkbh1	alkB homolog 1, histone H2A dioxygenase	-0.0450786	0.937753	221	352.5	255.5	322.5
Alkbh2	alkB homolog 2, alpha-ketoglutarate-dependent dioxygenase	-0.188042	0.823672	63	69	56	94
Alkbh3	alkB homolog 3, alpha-ketoglutarate-dependent dioxygenase	-0.169772	0.638692	588	606	624	703
Alkbh4	alkB homolog 4, lysine demethylase	-0.211644	0.780815	80	68	74	97
Alkbh5	alkB homolog 5, RNA demethylase	0.033613	0.958694	181	231	193	201
Alkbh6	alkB homolog 6	-0.253959	0.616174	178	157	205	189.33
Alkbh7	alkB homolog 7	0.0349467	0.953757	212	314.5	245.5	253.5
Alkbh8	alkB homolog 8, tRNA methyltransferase	0.00323764	0.998198	49	54	50	51
Alms1	ALMS1, centrosome and basal body associated	0.131139	0.721719	395	492	361	436
Alox12	arachidonate 12-lipoxygenase	-0.350927	0.638868	69	156	106	174
Alox12e	arachidonate lipoxygenase, epidermal	0.221363	0.927504	7	14	12	5
Alox15	arachidonate 15-lipoxygenase	1.94949	0.00277625	356	813	136	155
ALOX15B	-	-4.06203	0.0774258	1	1	22	10
Alox5	arachidonate 5-lipoxygenase	0.828119	0.000164127	1021	1157	577	630
Alox5ap	arachidonate 5-lipoxygenase activating protein	0.967679	0.000740272	786	1328	458	597
Aloxe3	arachidonate lipoxygenase 3	-2.36146	0.00999683	14	9	56	62
Alpk3	alpha-kinase 3	-0.0418175	0.976208	450	126	316	290
Alpl	alkaline phosphatase, liver/bone/kidney	0.244054	0.839002	56	37	42	36
Als2	alsin Rho guanine nucleotide exchange factor	0.242542	0.559385	246	364	248	254
Als2cr12	-	-0.282763	0.890567	7	16	13	14
Alx3	aristaless-like homeobox 3	-0.76341	NA	2	6	7	6
Alx4	aristaless-like homeobox 4	-1.21894	NA	3	3	5	9
Alyref	Aly/REF export factor	-0.380424	0.12128	581	649	732	847
Amacr	alpha-methylacyl-CoA racemase	0.268997	0.520347	210	212	164	182
Ambra1	autophagy/beclin 1 regulator 1	-0.00673348	0.98908	373	497	399	458
Amd1	S-adenosylmethionine decarboxylase 1	0.300256	0.155415	1306	1403	949	1232
Amdhd2	amidohydrolase domain containing 2	-0.34149	0.129938	739	749	881	982
Amer1	APC membrane recruitment 1	0.885317	0.0758793	89	111	53	53
Amh	anti-Mullerian hormone	0.932549	0.627773	12	20	2	15
Amhr2	anti-Mullerian hormone type 2 receptor	0.148987	NA	7	10	7	8
Amigo1	adhesion molecule with Ig like domain 1	-0.131362	0.930395	26	20	25	25
Amigo2	adhesion molecule with Ig like domain 2	1.03204	0.0179899	192	151.5	76	92
Amigo3	adhesion molecule with Ig like domain 3	-0.037137	0.96624	84	104	85	105
Ammecr1l	AMME chromosomal region gene 1-like	-0.0930001	0.795228	466	565	491	592
Amn1	antagonist of mitotic exit network 1	-0.257271	0.587009	124	158	162	168
Amotl2	angiomotin-like 2	0.284502	0.303342	1182	1075	879	958
Ampd1	adenosine monophosphate deaminase 1	0.951096	0.344627	3715	1159	1157	1444
Ampd2	adenosine monophosphate deaminase 2	0.287225	0.203111	664	793	544	631
Ampd3	adenosine monophosphate deaminase 3	-0.988705	0.00071957	204	159	326	393
Amph	amphiphysin	1.36217	0.00123316	132	152	49	60
Amt	aminomethyltransferase	-0.302239	0.697548	60	56	64	78
Amz1	archaelysin family metallopeptidase 1	-0.17974	0.63901	206	250	244	263
Amz2	archaelysin family metallopeptidase 2	0.0222948	0.958713	488	537	445	553
Anapc1	anaphase promoting complex subunit 1	0.173731	0.587252	988	1496	1024	1121
Anapc10	anaphase promoting complex subunit 10	0.0395688	0.946792	174	189	166	182
Anapc11	anaphase promoting complex subunit 11	0.0186031	0.954154	1050	1229	1022.25	1194
Anapc13	anaphase promoting complex subunit 13	-0.219316	0.440553	504.5	529.5	517.5	675.5
Anapc15	anaphase promoting complex C subunit 15	-0.377095	0.162945	466.5	539	607.5	676
Anapc2	anaphase promoting complex subunit 2	0.280632	0.230114	1340	1828	1186	1368
Anapc4	anaphase promoting complex subunit 4	0.0317202	0.923288	849	1044	862	956
Anapc5	anaphase-promoting complex subunit 5	0.0445333	0.860175	4459	4824	4052	4846
Anapc7	anaphase promoting complex subunit 7	-0.408605	0.165124	282	357	373	462
Ang	angiogenin, ribonuclease, RNase A family, 5	1.65161	1.73e-05	145.25	223	55.5	57.5
Angel1	angel homolog 1	-0.220483	0.683257	141	167	173	179
Angel2	angel homolog 2	0.299983	0.179772	568.8	694.53	465.2	544.9
Angpt1	angiopoietin 1	0.758951	0.0429017	206	202	125	112
Angpt2	angiopoietin 2	1.3886	2.27e-07	574.5	494	172	236
Angpt4	angiopoietin 4	1.09738	0.0169023	543	1269	372	443
Angptl1	angiopoietin-like 1	1.98227	3.7e-07	1831.5	991.5	337	386
Angptl2	angiopoietin-like 2	0.417565	0.247064	4294	3952	2931	3188
Angptl4	angiopoietin-like 4	-1.63429	0.000463619	351	486	1199	1341
Angptl6	angiopoietin-like 6	0.0767726	0.956878	28	44	35.5	30.5
Ank1	ankyrin 1, erythroid	0.266454	0.794306	250	101	142	155
Ank3	ankyrin 3, epithelial	-0.171565	0.792149	417	414	416	513
Ankef1	ankyrin repeat and EF-hand domain containing 1	2.2937	0.111811	27	28	6	5
Ankfy1	ankyrin repeat and FYVE domain containing 1	0.292777	0.233717	1782	2495	1544	1878
ANKH	-	-0.923083	7.78e-07	822	1021	1619	1811
Ankhd1	ankyrin repeat and KH domain containing 1	-0.167788	0.542035	867	1198	1062	1208
Ankib1	ankyrin repeat and IBR domain containing 1	0.199263	0.598031	384	574	342	478
Ankle2	ankyrin repeat and LEM domain containing 2	0.148915	0.727258	287.5	391	287	311.5
Ankmy2	ankyrin repeat and MYND domain containing 2	0.198578	0.54192	603	700.5	528.5	589
Ankra2	ankyrin repeat, family A (RFXANK-like), 2	0.0962632	0.82816	272	343	248	319
Ankrd1	ankyrin repeat domain 1 (cardiac muscle)	-3.28796	0.0997588	144	9	735	840
Ankrd10	ankyrin repeat domain 10	0.167264	0.620081	407	455	366	389
Ankrd12	ankyrin repeat domain 12	0.366967	0.142125	891	1250.5	722.5	907
Ankrd13a	ankyrin repeat domain 13a	0.0575284	0.825847	2346	2996	2282	2765
Ankrd13c	ankyrin repeat domain 13c	-0.449312	0.0601269	552	617.5	802.5	763
Ankrd13d	ankyrin repeat domain 13 family, member D	-0.227463	0.744891	87	96	93	119
Ankrd16	ankyrin repeat domain 16	-0.257761	0.765278	40	66	54	70
Ankrd17	ankyrin repeat domain 17	0.022659	0.94299	1397.5	1732	1446.5	1576
Ankrd2	ankyrin repeat domain 2 (stretch responsive muscle)	0.907974	0.51025	59	21	17	27
Ankrd22	ankyrin repeat domain 22	-2.33034	0.184599	15	5	46	57
Ankrd23	ankyrin repeat domain 23	0.274355	0.677896	2037	950	1159	1353
Ankrd24	ankyrin repeat domain 24	0.575908	0.0915518	281.5	306.5	168	223
Ankrd27	ankyrin repeat domain 27 (VPS9 domain)	0.106248	0.705609	659	774.5	597.5	713.5
Ankrd29	ankyrin repeat domain 29	1.22448	0.000136848	247	409	113	162
ANKRD32	-	-0.00227727	0.997103	172	196	162	202
Ankrd33b	ankyrin repeat domain 33B	-0.0458244	0.965175	59	48	49.5	60
Ankrd34a	ankyrin repeat domain 34A	1.72947	0.513093	13	6	1	5
Ankrd34c	ankyrin repeat domain 34C	0.957327	0.619793	6	176	37	50
Ankrd37	ankyrin repeat domain 37	0.933476	0.348483	37	143	45	44
Ankrd39	ankyrin repeat domain 39	-0.209165	0.820351	47.12	56.7	49.08	70.03
Ankrd40	ankyrin repeat domain 40	0.156597	0.458959	1086	1251	947	1120
Ankrd42	ankyrin repeat domain 42	-0.536183	0.270859	77	126	126	161.5
Ankrd44	ankyrin repeat domain 44	-0.0061043	0.993087	396	661	512	516
Ankrd46	ankyrin repeat domain 46	0.484039	0.0178906	632	672	426	495
Ankrd49	ankyrin repeat domain 49	-0.0827479	0.845738	448	495	487	494
Ankrd50	ankyrin repeat domain 50	-0.411112	0.449176	272	329	371	414
Ankrd52	ankyrin repeat domain 52	0.0669508	0.916553	303	358	282	340
Ankrd54	ankyrin repeat domain 54	-0.158177	0.777139	138	163	166	163
Ankrd55	ankyrin repeat domain 55	0.415452	0.721037	54	37	42	25
Ankrd6	ankyrin repeat domain 6	-0.443193	0.443076	72	89	109	105
Ankrd61	ankyrin repeat domain 61	-0.388928	0.876694	14	4	12.5	12
Ankrd9	ankyrin repeat domain 9	0.581779	0.437849	176	96	89	94
ANKS1A	-	0.212576	0.506275	549	512	431	476
Anks1b	ankyrin repeat and sterile alpha motif domain containing 1B	4.26127	0.0202857	11	29	1	1
Anks3	ankyrin repeat and sterile alpha motif domain containing 3	0.00466957	0.993638	245	282	244	273
Anks4b	ankyrin repeat and sterile alpha motif domain containing 4B	-1.35718	0.472454	6	5	13	15
Anks6	ankyrin repeat and sterile alpha motif domain containing 6	0.0154036	0.984983	101	141	105	130
Ankzf1	ankyrin repeat and zinc finger domain containing 1	0.232198	0.32393	1080	1208.5	848	1079
Ano1	anoctamin 1, calcium activated chloride channel	1.12858	0.0855284	140	98	51	58
Ano4	anoctamin 4	-0.296332	NA	5	4	5	6
Ano6	anoctamin 6	0.188085	0.569061	1999	3031	1965.5	2346
Anp32a	acidic (leucine-rich) nuclear phosphoprotein 32 family, member A	0.157664	0.631718	1274	1747	1268	1378
Anp32b	acidic (leucine-rich) nuclear phosphoprotein 32 family, member B	-0.213086	0.397726	1317	1886	1638	1999
Anp32e	acidic (leucine-rich) nuclear phosphoprotein 32 family, member E	-0.0993649	0.761169	595	713	630	750
Anpep	alanyl (membrane) aminopeptidase	0.635731	0.0288	11123	20298	9145	10441
Antxr1	anthrax toxin receptor 1	0.657004	0.00265424	1309	1788	915	1005
Anxa1	annexin A1	0.0183601	0.966096	12553	15831	12786	14728
Anxa10	annexin A10	-0.298468	0.894645	13.17	9	13	14
Anxa11	annexin A11	-0.0100583	0.981568	2196	2990	2386	2726
Anxa2	annexin A2	0.0433393	0.909876	19559	23869	19169	22268
Anxa3	annexin A3	0.934757	0.000243257	758	1246	467	554
Anxa4	annexin A4	-0.131994	0.508704	5739	7506	6565	7674
Anxa5	annexin A5	-0.204395	0.52366	12747	12257	13352	15205
Anxa6	annexin A6	0.595302	0.000395471	6574	8365	4549	5150
Anxa7	annexin A7	-0.050933	0.884399	2317	3311	2701	2990
Anxa8	annexin A8	-1.52357	0.39973	336	231	724	918
Aoah	acyloxyacyl hydrolase	0.753581	0.0308448	212	321	133	177
AOC2-PS1	-	0.989447	0.310609	44	48	19	27
Aoc3	amine oxidase, copper containing 3	1.41237	0.000104643	3045	2223	910	1074
Aox1	aldehyde oxidase 1	0.934012	0.00204591	703	627	342	347
Aox2	aldehyde oxidase 2	-0.671008	0.649662	14	12	20	21
Aox3	aldehyde oxidase 3	2.33844	0.000476903	507	301	62.5	101.25
Aox4	aldehyde oxidase 4	-2.92843	0.0671372	8	3	39	46
Ap1ar	adaptor-related protein complex 1 associated regulatory protein	-0.45125	0.0583214	296	341	413	443
Ap1b1	adaptor protein complex AP-1, beta 1 subunit	0.127859	0.66429	1980	2286	1744	2108
Ap1g1	adaptor protein complex AP-1, gamma 1 subunit	0.339532	0.259471	712	1146	643	790
Ap1m1	adaptor-related protein complex AP-1, mu subunit 1	-0.105017	0.693364	1167	1338	1256	1395
Ap1m2	adaptor protein complex AP-1, mu 2 subunit	-3.63401	0.00383018	27	5	203	206
Ap1s1	adaptor protein complex AP-1, sigma 1	-0.391872	0.0162771	911	1065	1184	1369
Ap1s2	adaptor-related protein complex 1, sigma 2 subunit	0.449823	0.0996309	1196	1447	876	1028
Ap1s3	adaptor-related protein complex AP-1, sigma 3	-0.942688	0.0522	69	102	166	153
Ap2a1	adaptor-related protein complex 2, alpha 1 subunit	-0.346748	0.169509	690	894	955	1016
Ap2a2	adaptor-related protein complex 2, alpha 2 subunit	0.531162	0.0120175	3181	4266.5	2303	2751.5
Ap2b1	adaptor-related protein complex 2, beta 1 subunit	0.19146	0.54304	2399	3867	2505	2832
Ap2m1	adaptor-related protein complex 2, mu 1 subunit	-0.118114	0.523376	6505	7182	6901	7740
Ap2s1	adaptor-related protein complex 2, sigma 1 subunit	-0.310918	0.126201	1988	1919	2232	2572
Ap3b1	adaptor-related protein complex 3, beta 1 subunit	0.268076	0.310991	1091	1555.5	980	1171.5
Ap3d1	adaptor-related protein complex 3, delta 1 subunit	-0.269283	0.106748	1810	2295	2219	2644
Ap3m1	adaptor-related protein complex 3, mu 1 subunit	0.202666	0.475945	1077	1459	918	1253
Ap3m2	adaptor-related protein complex 3, mu 2 subunit	0.835498	0.0692349	125	193	80	94
Ap3s1	adaptor-related protein complex 3, sigma 1 subunit	-0.213112	0.519181	512	782	685	778
Ap3s2	adaptor-related protein complex 3, sigma 2 subunit	0.0390248	0.936414	538	532	466	567
Ap4b1	adaptor-related protein complex AP-4, beta 1	0.119617	0.75697	318	367	281	341
Ap4e1	adaptor-related protein complex AP-4, epsilon 1	0.218431	0.65974	194	267	181	207
Ap4m1	adaptor-related protein complex AP-4, mu 1	-0.119969	0.816656	165.5	235	195	231.5
Ap4s1	adaptor-related protein complex AP-4, sigma 1	0.115132	0.815314	243	253	199	255
Ap5b1	adaptor-related protein complex 5, beta 1 subunit	-0.0391397	0.937856	368.03	334.92	325.45	392.57
Ap5m1	adaptor-related protein complex 5, mu 1 subunit	0.144213	0.720471	299	400	289	331
Ap5s1	adaptor-related protein 5 complex, sigma 1 subunit	-0.108202	0.895466	62	90	77	83
Ap5z1	adaptor-related protein complex 5, zeta 1 subunit	-0.275167	0.402794	275	387	344	443
Apaf1	apoptotic peptidase activating factor 1	0.616329	0.0293212	601	952	480	504
Apba1	amyloid beta (A4) precursor protein binding, family A, member 1	0.451775	0.276328	189	314	159	200
Apba2	amyloid beta (A4) precursor protein-binding, family A, member 2	0.377118	0.865481	31	15	23	12
Apba3	amyloid beta (A4) precursor protein-binding, family A, member 3	-0.411523	0.190014	438.5	495	604.5	614
Apbb1	amyloid beta (A4) precursor protein-binding, family B, member 1	0.526451	0.192588	261	310	182	208
Apbb1ip	amyloid beta (A4) precursor protein-binding, family B, member 1 interacting protein	-0.0467843	0.933713	751	1385	981	1159
Apbb3	amyloid beta (A4) precursor protein-binding, family B, member 3	-0.0540113	0.936861	253	254	248.5	271.5
Apc	APC, WNT signaling pathway regulator	0.307315	0.291541	830	909	629	760
Apc2	APC regulator of WNT signaling pathway 2	1.21557	0.00290652	146.5	144	54.5	70.5
APEG3	-	1.06207	0.0305876	129.5	117.5	54.5	64
Apeh	acylpeptide hydrolase	-0.126238	0.629275	759	910	869	918
Apex1	apurinic/apyrimidinic endonuclease 1	-0.589242	0.0134773	668	714	902	1159
Apex2	apurinic/apyrimidinic endonuclease 2	-0.296972	0.508624	131	140	158	170
Aph1a	aph1 homolog A, gamma secretase subunit	-0.0793995	0.797274	1338	1766	1557	1649
Aph1b	aph1 homolog B, gamma secretase subunit	0.274057	0.273493	1555.42	2006.58	1243.25	1662.33
Api5	apoptosis inhibitor 5	0.0219287	0.936944	2124	2567	2136	2404
Apip	APAF1 interacting protein	0.123962	0.836568	136	145	115	140
APITD1	-	-0.36838	0.479723	96	107	123	135
Aplf	aprataxin and PNKP like factor	-0.0739333	0.860175	294	338	307	348
Apln	apelin	1.88561	0.000491	92	252	43	46
Aplnr	apelin receptor	0.517329	0.248	408	309	230	271
Aplp1	amyloid beta (A4) precursor-like protein 1	-0.906694	0.198349	295	191	444	469
Aplp2	amyloid beta (A4) precursor-like protein 2	0.455165	0.00143702	5761	7477	4361	5116
Apmap	adipocyte plasma membrane associated protein	0.0662027	0.855617	479	591	486	516
Apoa1	apolipoprotein A-I	-0.378112	NA	3	10	9	7
APOA1BP	-	0.10019	0.783361	440	470	399	438
Apoa5	apolipoprotein A-V	-4.19056	NA	1	1	17	19
Apobec1	apolipoprotein B mRNA editing enzyme, catalytic polypeptide 1	-0.0158321	0.972748	777	835	770	836
Apobec2	apolipoprotein B mRNA editing enzyme, catalytic polypeptide 2	1.07582	0.0172036	2502	1285	827	997
APOBEC3B	-	0.0191234	0.982563	104	125	98	125
Apobr	apolipoprotein B receptor	-0.557316	0.0704766	195	219	298	300
Apoc1	apolipoprotein C-I	0.453677	0.366883	210.5	204	113	190
Apoc2	apolipoprotein C-II	-2.19101	NA	3	0	3	12
Apoc3	apolipoprotein C-III	-1.7558	0.29844	4	18	30	41
Apoc4	apolipoprotein C-IV	0.363221	0.91	24.5	2	11	10
Apod	apolipoprotein D	-0.162741	0.865329	589	225	422	511
Apoe	apolipoprotein E	0.868954	0.000122522	133529	125290	66731	73715
APOL3	-	0.407947	0.117889	444.5	484	299	394
Apol9a	apolipoprotein L 9a	0.674556	0.154083	689	1223	527	637
Apold1	apolipoprotein L domain containing 1	0.151949	0.896984	230	217	193	205
Apom	apolipoprotein M	-0.786931	0.692166	5	6	6	13
Apoo	apolipoprotein O	-0.244021	0.616	217	182	205	267
Apool	apolipoprotein O-like	0.0887908	0.839324	295	331	272	308
Apopt1	apoptogenic, mitochondrial 1	-0.123869	0.769629	342	419	373	443
App	amyloid beta (A4) precursor protein	0.544534	0.0113854	9488	14879	7636	8625
Appbp2	amyloid beta precursor protein (cytoplasmic tail) binding protein 2	0.169133	0.568331	962	1411	970	1090
Appl2	adaptor protein, phosphotyrosine interaction, PH domain and leucine zipper containing 2	0.688155	0.0229876	598	668	387	384
Aprt	adenine phosphoribosyl transferase	0.327881	0.126183	2803	3350	2211	2616
APTR	-	-0.541754	0.724094	7	15	15	15.5
Aptx	aprataxin	-0.358428	0.469527	128	124	163	155
Aqp1	aquaporin 1	0.733747	0.163505	4296	2355	1866	2182
Aqp11	aquaporin 11	-1.55139	0.287	5	8	19	18
Aqp3	aquaporin 3	-3.19649	0.174778	44	9	234	270
Aqp4	aquaporin 4	0.950152	0.508084	206	24	62	62
Aqp5	aquaporin 5	-2.59513	NA	0	2	8	3
Aqp7	aquaporin 7	1.86354	0.276328	21	58	8	13
Aqp9	aquaporin 9	-0.81873	0.566661	8	8	12	16
Aqr	aquarius	0.131051	0.703609	697	1017	693	839
Ar	androgen receptor	1.70392	0.000312562	135	273	65	55
Araf	Araf proto-oncogene, serine/threonine kinase	0.154988	0.551999	917	1013	808.5	900.5
Arap2	ArfGAP with RhoGAP domain, ankyrin repeat and PH domain 2	-1.8566	1.42e-07	74	77	273	264
Arc	activity regulated cytoskeletal-associated protein	1.05925	0.0539664	71	94	33	45
Arcn1	archain 1	0.475353	0.0290299	4326	6399	3509	4020
Areg	amphiregulin	-2.37702	0.12463	11	2	35	34
Arel1	apoptosis resistant E3 ubiquitin protein ligase 1	-0.0276157	0.935727	676	808	679	811
Arf1	ADP-ribosylation factor 1	0.0735341	0.769	4282	5668	4213.5	5068.5
Arf2	ADP-ribosylation factor 2	0.597829	0.0369101	749	996	505	628
Arf3	ADP-ribosylation factor 3	-0.100085	0.658454	2137	2657	2380.5	2663
Arf4	ADP-ribosylation factor 4	0.816035	9.59e-07	7848	11085.5	4804	5723.5
Arf5	ADP-ribosylation factor 5	-0.0721883	0.784737	2300	2648	2469	2642
Arf6	ADP-ribosylation factor 6	-0.43853	0.0112543	853	979	1164	1278
Arfgap1	ADP-ribosylation factor GTPase activating protein 1	0.267366	0.266209	914	1093	801	834
Arfgap2	ADP-ribosylation factor GTPase activating protein 2	-0.193212	0.493	1252	1149	1283	1440
Arfgap3	ADP-ribosylation factor GTPase activating protein 3	0.516312	0.00699999	1215	1512	843	1034
Arfgef1	ADP-ribosylation factor guanine nucleotide-exchange factor 1(brefeldin A-inhibited)	-0.0380013	0.923251	864	1274	997	1147
Arfgef2	ADP-ribosylation factor guanine nucleotide-exchange factor 2 (brefeldin A-inhibited)	0.0558696	0.907232	613	961	651	830
Arfip1	ADP-ribosylation factor interacting protein 1	0.4233	0.129807	585	868	479	581
Arfip2	ADP-ribosylation factor interacting protein 2	0.00623672	0.99126	802.5	833.5	791	813
Arfrp1	ADP-ribosylation factor related protein 1	-0.100391	0.778502	349	388	363	415.5
Arg1	arginase, liver	0.115093	0.924073	219	623	351	391
Arg2	arginase type II	1.12143	0.272149	29	39	11	20
Arglu1	arginine and glutamate rich 1	-0.537262	0.0137416	563	655	785	959
Arhgap1	Rho GTPase activating protein 1	0.296917	0.159616	1766	2412	1533.5	1798
Arhgap10	Rho GTPase activating protein 10	-0.393517	0.218432	392	664	620	730.5
Arhgap11a	Rho GTPase activating protein 11A	-0.329354	0.353996	364	587	547	616
Arhgap12	Rho GTPase activating protein 12	0.111224	0.775129	407	561	398	481
Arhgap15	Rho GTPase activating protein 15	0.225155	0.638235	239	348	220	272
Arhgap17	Rho GTPase activating protein 17	0.0891177	0.767199	1214	1618	1188	1425
Arhgap18	Rho GTPase activating protein 18	0.176666	0.512322	1239	1591	1088	1377
Arhgap20	Rho GTPase activating protein 20	0.94332	0.0982323	92	128	44	69
Arhgap21	Rho GTPase activating protein 21	0.591247	0.00586707	873	1153	602	718
Arhgap22	Rho GTPase activating protein 22	-0.93402	4.13e-05	294	449	665	718.5
Arhgap24	Rho GTPase activating protein 24	-0.109334	0.769629	273	318	297.5	329
Arhgap25	Rho GTPase activating protein 25	0.160954	0.799043	471	1128	626	750
Arhgap26	Rho GTPase activating protein 26	0.65636	0.271072	72	152	67	70
Arhgap27	Rho GTPase activating protein 27	-0.694201	0.0485692	205	227	316	374
Arhgap28	Rho GTPase activating protein 28	0.784344	0.0220474	293	289	160	174
Arhgap29	Rho GTPase activating protein 29	0.509784	0.0076675	955.5	1152	627	836
Arhgap30	Rho GTPase activating protein 30	-0.0520947	0.892043	897	1317	1031	1213
Arhgap31	Rho GTPase activating protein 31	0.376119	0.19105	437	517	332	392
Arhgap35	Rho GTPase activating protein 35	0.164336	0.507411	803	1045	751	867
Arhgap39	Rho GTPase activating protein 39	-0.35275	0.413972	174	165	214	213
Arhgap4	Rho GTPase activating protein 4	0.129015	0.747335	484	575	471	478
Arhgap5	Rho GTPase activating protein 5	0.690246	0.0202979	324	485	240.5	248
Arhgap8	Rho GTPase activating protein 8	1.82017	0.0966618	21	29	5	9
Arhgap9	Rho GTPase activating protein 9	0.0467574	0.935276	708.5	1271.5	865	994
Arhgdia	Rho GDP dissociation inhibitor (GDI) alpha	-0.221281	0.154173	10958	13494	13015	14995.5
Arhgdib	Rho, GDP dissociation inhibitor (GDI) beta	-0.0734796	0.868706	3357	4027	3451	4207
Arhgef1	Rho guanine nucleotide exchange factor (GEF) 1	-0.397328	0.090241	1418	1682	1878	2138
Arhgef11	Rho guanine nucleotide exchange factor (GEF) 11	0.158936	0.638235	717.5	879	668.5	736.5
Arhgef12	Rho guanine nucleotide exchange factor (GEF) 12	0.330039	0.214269	645	770	511	597
Arhgef15	Rho guanine nucleotide exchange factor (GEF) 15	0.328188	0.593123	152	111	100	109
Arhgef16	Rho guanine nucleotide exchange factor (GEF) 16	0.462941	0.616931	50	48	28	43
Arhgef18	rho/rac guanine nucleotide exchange factor (GEF) 18	0.485794	0.128733	296	346	205	247
Arhgef19	Rho guanine nucleotide exchange factor (GEF) 19	-0.704475	0.40899	111	134	180	213
Arhgef2	rho/rac guanine nucleotide exchange factor (GEF) 2	-0.0605882	0.833936	1185	1367	1187	1439
Arhgef25	Rho guanine nucleotide exchange factor (GEF) 25	0.661573	0.00202754	863.5	1018	551.5	618
Arhgef28	Rho guanine nucleotide exchange factor (GEF) 28	-0.62196	0.129218	103	132	166	189
Arhgef3	Rho guanine nucleotide exchange factor (GEF) 3	0.583986	0.00401309	1291	1736	888	1095
Arhgef37	Rho guanine nucleotide exchange factor (GEF) 37	-0.165341	0.904051	78	39	60	73
Arhgef39	Rho guanine nucleotide exchange factor (GEF) 39	0.0412525	0.961615	110	114	101	114
Arhgef40	Rho guanine nucleotide exchange factor (GEF) 40	0.400868	0.201054	829	972	623	720.5
Arhgef6	Rac/Cdc42 guanine nucleotide exchange factor (GEF) 6	0.698288	0.0126104	466	750	317	416
Arhgef7	Rho guanine nucleotide exchange factor (GEF7)	0.341475	0.178382	1156	1042	790	935
Arhgef9	CDC42 guanine nucleotide exchange factor (GEF) 9	0.839236	0.265219	72	66.33	40.5	35.5
Arid1a	AT rich interactive domain 1A (SWI-like)	-0.206834	0.425986	1192	1420	1379	1587
Arid3a	AT rich interactive domain 3A (BRIGHT-like)	-0.443558	0.452796	118	112	137	174
Arid3b	AT rich interactive domain 3B (BRIGHT-like)	-0.00434997	0.996919	79	99	77	99
Arid4a	AT rich interactive domain 4A (RBP1-like)	0.280805	0.468568	371	626	386	410.5
Arid4b	AT rich interactive domain 4B (RBP1-like)	0.13991	0.652098	557	637	479	591
Arid5a	AT rich interactive domain 5A (MRF1-like)	-0.181073	0.673199	327	285	325	364
Arid5b	AT rich interactive domain 5B (MRF1-like)	0.174636	0.622095	287	340	252	295
Arih1	ariadne RBR E3 ubiquitin protein ligase 1	-0.125042	0.596951	1022	1233	1143	1273
Arih2	ariadne RBR E3 ubiquitin protein ligase 2	-0.275375	0.190205	743	865	929	982
Arl1	ADP-ribosylation factor-like 1	0.72077	0.000932639	1375	2106	949	1112
Arl10	ADP-ribosylation factor-like 10	-0.0723748	0.961227	27	40	31	38
Arl11	ADP-ribosylation factor-like 11	-0.541484	0.00192081	1187	1552	1823	2086
Arl13a	ADP-ribosylation factor-like 13A	-0.668976	NA	4	5	7	7
Arl13b	ADP-ribosylation factor-like 13B	-0.401828	0.328969	269	254	340	342
Arl14ep	ADP-ribosylation factor-like 14 effector protein	0.263751	0.439869	293	303	217	275
Arl2	ADP-ribosylation factor-like 2	-0.272127	0.477654	293	294	350	348
Arl2bp	ADP-ribosylation factor-like 2 binding protein	0.416	0.0133051	1529	1942	1145	1415
Arl3	ADP-ribosylation factor-like 3	0.371359	0.075707	665	783	511	591
Arl4a	ADP-ribosylation factor-like 4A	-0.170911	0.72998	355	292	369	352
Arl4c	ADP-ribosylation factor-like 4C	-0.363523	0.313464	700	890	894	1120
Arl4d	ADP-ribosylation factor-like 4D	0.384206	0.610774	75	185	86	106
Arl5a	ADP-ribosylation factor-like 5A	0.147044	0.721719	250	306	227	267
Arl5b	ADP-ribosylation factor-like 5B	-0.0863591	0.862943	236	290	255	294
Arl5c	ADP-ribosylation factor-like 5C	-0.464515	0.292049	100.5	101.5	124	151.5
Arl6	ADP-ribosylation factor-like 6	0.613875	0.298883	117	154	63	113
Arl6ip1	ADP-ribosylation factor-like 6 interacting protein 1	0.0261254	0.968276	1424	1946	1415	1839
Arl6ip4	ADP-ribosylation factor-like 6 interacting protein 4	-0.390949	0.106	363	417	450	560
Arl6ip5	ADP-ribosylation factor-like 6 interacting protein 5	0.224598	0.432526	1129	1706	1117	1248
Arl6ip6	ADP-ribosylation factor-like 6 interacting protein 6	0.141286	0.767367	195	255	181	220
Arl8a	ADP-ribosylation factor-like 8A	-0.142711	0.565789	1187	1558	1339	1639
Arl8b	ADP-ribosylation factor-like 8B	-0.621246	3.97e-05	1814	2324	2822	3437
Armc1	armadillo repeat containing 1	-0.063186	0.863695	458	545	503	525
Armc10	armadillo repeat containing 10	0.113663	0.722	530	668	487	603
Armc3	armadillo repeat containing 3	-0.0224267	0.992811	18	60	32	44
Armc5	armadillo repeat containing 5	-0.222605	0.514084	410	488	451	584
Armc6	armadillo repeat containing 6	0.176103	0.818929	106	163	118.5	113
Armc7	armadillo repeat containing 7	-0.294646	0.587589	101	120.5	129.5	135.5
Armc8	armadillo repeat containing 8	0.161374	0.617542	500	609	446	530
Armc9	armadillo repeat containing 9	0.25783	0.414	313	384	283	288
Armcx1	armadillo repeat containing, X-linked 1	0.500121	0.058408	379	525	290	336
Armcx2	armadillo repeat containing, X-linked 2	0.66224	0.0182638	347	504	242	284
Armcx3	armadillo repeat containing, X-linked 3	0.522532	0.00217638	1201	1519	859	1001
Armcx6	armadillo repeat containing, X-linked 6	0.805297	0.0610921	166	211	105	106
Armt1	acidic residue methyltransferase 1	0.339849	0.274114	264	300	197	243
Arnt	aryl hydrocarbon receptor nuclear translocator	0.767273	0.000516633	680	901	406	507
Arnt2	aryl hydrocarbon receptor nuclear translocator 2	-1.6844	0.000322202	31	74	145	182
Arntl	aryl hydrocarbon receptor nuclear translocator-like	-0.498629	0.291297	116	168	164	231
Arntl2	aryl hydrocarbon receptor nuclear translocator-like 2	-0.0726525	0.955907	32	47.5	40.5	42
Arpc1a	actin related protein 2/3 complex, subunit 1A	0.203935	0.286533	1642	2078	1495	1673
Arpc1b	actin related protein 2/3 complex, subunit 1B	-0.0652616	0.806113	7339	9921	8349	9316
Arpc2	actin related protein 2/3 complex, subunit 2	-0.0652247	0.77558	6452	8285	7033	8095
Arpc3	actin related protein 2/3 complex, subunit 3	-0.17636	0.378829	3459	4514	4057	4785.5
Arpc4	actin related protein 2/3 complex, subunit 4	-0.381365	0.0278647	2578	3188	3460.5	3915
Arpc5	actin related protein 2/3 complex, subunit 5	-0.240006	0.181839	3651	4801	4574	5208.5
Arpc5l	actin related protein 2/3 complex, subunit 5-like	-0.480929	0.0175569	563	715	817	933.5
Arpin	actin-related protein 2/3 complex inhibitor	0.0675699	0.90493	253	300	251	267
Arpp19	cAMP-regulated phosphoprotein 19	-0.215949	0.443	605	747	705	840
Arpp21	cyclic AMP-regulated phosphoprotein, 21	-0.901048	0.436757	72	28	91	99
Arr3	arrestin 3, retinal	-0.157976	0.941151	10	8	9	11
Arrb1	arrestin, beta 1	0.456036	0.111099	353	493.5	283.5	320
Arrb2	arrestin, beta 2	-0.0350017	0.926111	683.5	744	699	741
Arrdc1	arrestin domain containing 1	-0.352534	0.0735951	658	829	844	1024
Arrdc2	arrestin domain containing 2	-0.00224361	0.998098	164	196	163	192
Arrdc3	arrestin domain containing 3	0.0950128	0.867668	263	489	308	376
Arrdc4	arrestin domain containing 4	-0.501094	0.235426	115	188	216	199
Arsa	arylsulfatase A	0.110808	0.767808	481	494	435	455
Arsb	arylsulfatase B	-0.0345956	0.945804	1398.5	1779	1517	1671.5
ARSE	-	0.138496	0.686533	448	494	416	425
Arsg	arylsulfatase G	0.525485	0.382034	66	86	45	59
Arsi	arylsulfatase i	1.65154	0.00201512	154	364	63	97
Arsj	arylsulfatase J	0.76917	0.193305	68	74	31	52
Arsk	arylsulfatase K	0.375624	0.323978	186	204	134	163
Art1	ADP-ribosyltransferase 1	0.0910625	0.947244	305.5	91.5	180.5	203.5
Art2b	ADP-ribosyltransferase 2b	-0.624535	NA	3	6	10	3
Art3	ADP-ribosyltransferase 3	1.26866	0.000905342	1742	2128	700	884
Art4	ADP-ribosyltransferase 4	-2.18398	0.0774657	16	4	43	50
Art5	ADP-ribosyltransferase 5	-0.331179	0.824089	100.5	23.5	67.5	93.5
Artn	artemin	-0.290448	0.852142	19	13	19	20
Arv1	ARV1 homolog, fatty acid homeostasis modulator	-0.860878	0.0344934	77	88	139	156
Arvcf	armadillo repeat gene deleted in velocardiofacial syndrome	-0.307178	0.540301	210	187	226	262
Arx	aristaless related homeobox	-0.186543	0.945354	16	6	8	18
As3mt	arsenic (+3 oxidation state) methyltransferase	0.171827	0.634965	307	330	261	297
Asah1	N-acylsphingosine amidohydrolase 1	0.0621108	0.851172	2458	3558	2566	3072
Asah2	N-acylsphingosine amidohydrolase 2	0.119465	0.875117	95	97	79	96
Asap1	ArfGAP with SH3 domain, ankyrin repeat and PH domain1	0.240163	0.427709	634	944	597	709
Asb1	ankyrin repeat and SOCS box-containing 1	-0.456473	0.62781	60	30	63	61
Asb10	ankyrin repeat and SOCS box-containing 10	1.54244	0.249189	80	16	17	17
Asb11	ankyrin repeat and SOCS box-containing 11	1.45866	0.0890823	291	77	65	73
Asb12	ankyrin repeat and SOCS box-containing 12	0.531513	0.59103	185	71	69	114
Asb13	ankyrin repeat and SOCS box-containing 13	0.14122	0.84077	118	145	120	113
Asb14	ankyrin repeat and SOCS box-containing 14	0.828733	0.321815	89	48	35	43
Asb16	ankyrin repeat and SOCS box-containing 16	0.690189	0.627648	87	26	33	39
Asb2	ankyrin repeat and SOCS box-containing 2	0.00917026	0.995743	192	55	114.5	139
Asb3	ankyrin repeat and SOCS box-containing 3	0.203133	0.622185	203	253	183	206
Asb5	ankyrin repeat and SOCs box-containing 5	0.354312	0.705858	227	137	132	155
Asb6	ankyrin repeat and SOCS box-containing 6	-0.270259	0.404905	300.5	335	359	395
Asb7	ankyrin repeat and SOCS box-containing 7	0.211257	0.825229	42	74	41	57
Asb8	ankyrin repeat and SOCS box-containing 8	0.185885	0.504564	777	787.5	618	745
Ascc1	activating signal cointegrator 1 complex subunit 1	0.19622	0.440553	578	692	496	596
Ascc2	activating signal cointegrator 1 complex subunit 2	-0.357946	0.342359	340	507	493	567
Ascc3	activating signal cointegrator 1 complex subunit 3	0.00201792	0.998165	683	1175	831	972
Ascl3	achaete-scute family bHLH transcription factor 3	-1.1762	0.559936	4	3	5	11
Asf1a	anti-silencing function 1A histone chaperone	-0.0790903	0.880575	211	226	202	255
Asf1b	anti-silencing function 1B histone chaperone	-0.0745634	0.905997	134	212	176	178
Asgr2	asialoglycoprotein receptor 2	1.58182	6.43e-09	560	856	210	252
Ash1l	ASH1 like histone lysine methyltransferase	0.394406	0.0799562	1202	1660.5	986.5	1146
Ash2l	ASH2 like histone lysine methyltransferase complex subunit	0.066482	0.846519	634	814	633	724
Asic1	acid-sensing (proton-gated) ion channel 1	-1.03621	0.681864	1	7	4	12
Asic2	acid-sensing (proton-gated) ion channel 2	-2.98735	NA	2	0	10	6
Asic4	acid-sensing (proton-gated) ion channel family member 4	-1.2998	0.513093	3	10	12	19
Asl	argininosuccinate lyase	-0.103395	0.753476	617	801	671	827
ASMTL	-	-0.201211	0.492045	355	390	384	461.5
Asna1	arsA arsenite transporter, ATP-binding, homolog 1 (bacterial)	-0.172314	0.513093	982	1112	1120	1200
Asns	asparagine synthetase	-0.210791	0.566216	258	325	314	348
Asnsd1	asparagine synthetase domain containing 1	-0.0286222	0.941266	943	959	900	1018
Aspa	aspartoacylase	0.849502	0.0899803	212	271	123	140
Aspg	asparaginase	-2.42313	0.101492	28	5	87	96
Asphd2	aspartate beta-hydroxylase domain containing 2	-5.20586	NA	0	0	9	4
Aspm	abnormal spindle microtubule assembly	-0.176798	0.75697	172	319	274	261
Aspn	asporin	1.49767	2.48e-12	6239	5757	2004.67	2207
Asrgl1	asparaginase like 1	1.03592	0.0347272	144	136	58	78
Ass1	argininosuccinate synthetase 1	-2.40251	5.73e-07	152	166	798	857
Aste1	asteroid homolog 1	-0.436759	0.549691	49.5	69	71.5	86
Astn1	astrotactin 1	0.904749	0.483304	18	28	11	13
Astn2	astrotactin 2	1.3153	0.280953	21	132	25	33
ASUN	-	-0.105572	0.772731	394	445	419	470
Atad1	ATPase family, AAA domain containing 1	0.211842	0.31148	1100	1268	943	1070
Atad2	ATPase family, AAA domain containing 2	0.154072	0.685904	579	867	643	618
Atad2b	ATPase family, AAA domain containing 2B	-0.165972	0.808561	73	102	84	109
Atad3a	ATPase family, AAA domain containing 3A	-0.341905	0.220905	366	441	497	505
Atat1	alpha tubulin acetyltransferase 1	-0.105826	0.894656	91.5	101	101.5	101.5
Atcay	ataxia, cerebellar, Cayman type	0.514638	NA	6	9	7	3
Ate1	arginyltransferase 1	0.312289	0.263366	661	744.5	529	585
Atf1	activating transcription factor 1	0.0734305	0.82723	727	859	693	790
Atf2	activating transcription factor 2	0.693991	0.00753566	436	584	287	331
Atf3	activating transcription factor 3	-0.30598	0.654682	696.5	1863.33	1431	1593.17
Atf4	activating transcription factor 4	-0.252457	0.104731	2952	3502	3419	4161
Atf5	activating transcription factor 5	0.721534	0.00410582	1284	1786	878	939
Atf6	activating transcription factor 6	0.263985	0.422813	620	931	578	684
Atf6b	activating transcription factor 6 beta	-0.349306	0.0856	900	1120	1183.5	1343
Atf7	activating transcription factor 7	0.5163	0.177196	249	367	209	210.5
Atg10	autophagy related 10	-0.325828	0.546585	137	137	171	167
Atg101	autophagy related 101	-0.126375	0.760906	443	448	434	530
Atg12	autophagy related 12	-0.0194385	0.960638	648	730	631	747
Atg13	autophagy related 13	0.276367	0.322681	494	677	417.5	532
Atg14	autophagy related 14	0.348805	0.424016	172.5	189	127	153
Atg16l1	autophagy related 16-like 1 (S. cerevisiae)	-0.203482	0.523376	611	563	634	706
Atg16l2	autophagy related 16-like 2 (S. cerevisiae)	-0.31567	0.472187	130	156	180	168
Atg2a	autophagy related 2A	-0.462008	0.0664635	529	520.5	697.5	728.5
Atg3	autophagy related 3	-0.0760617	0.794306	759	967	840	945
ATG4AL1	-	0.236663	0.464113	382	400.5	295	361.5
Atg4b	autophagy related 4B, cysteine peptidase	-0.367342	0.0963115	566	592	699.5	774
Atg4c	autophagy related 4C, cysteine peptidase	-0.726794	0.00280611	264	388	504	549
Atg4d	autophagy related 4D, cysteine peptidase	-0.352461	0.234031	387.5	367	462	491
Atg5	autophagy related 5	-0.00934322	0.982563	545	658	538	655
Atg7	autophagy related 7	-0.360909	0.27439	279	364	385	424
Atg9a	autophagy related 9A	0.0402127	0.923501	1238	1188	1080	1260
Atg9b	autophagy related 9B	-2.80535	0.00118586	85	21	361	402
Atic	5-aminoimidazole-4-carboxamide ribonucleotide formyltransferase/IMP cyclohydrolase	-0.187604	0.290453	1660	1930	1858.5	2169.5
Atl1	atlastin GTPase 1	1.05647	0.120475	47	59	24	26
Atl2	atlastin GTPase 2	-0.061408	0.894871	694	588	623	708
Atl3	atlastin GTPase 3	0.797185	0.00297661	835	1209	530	620
Atm	ataxia telangiectasia mutated	0.920098	3.15e-09	986	1146	512	598
Atmin	ATM interactor	0.0181845	0.972748	314	324	287	336
Atn1	atrophin 1	-0.112713	0.751512	686	884	780	885
Atoh8	atonal bHLH transcription factor 8	1.06623	0.179373	55	45	27	20
Atox1	antioxidant 1 copper chaperone	-0.441425	0.0103242	1500	1793	2079	2315
Atp10a	ATPase, class V, type 10A	0.472813	0.292	455	422	293	334
Atp11a	ATPase, class VI, type 11A	-0.113822	0.818929	1236	1484	1319	1580
Atp12a	ATPase, H+/K+ transporting, nongastric, alpha polypeptide	-1.66845	0.462546	35	1	61	59
Atp13a1	ATPase type 13A1	-0.24343	0.586984	1005	1274	1214	1437
Atp13a2	ATPase type 13A2	-0.860563	0.00526813	966	734	1445	1639
Atp13a3	ATPase type 13A3	0.205768	0.873573	35	62	36.5	46
Atp13a4	ATPase type 13A4	-3.65566	0.00140594	15	5	104	155
Atp1a1	ATPase, Na+/K+ transporting, alpha 1 polypeptide	-0.116897	0.831808	4573	9738	6850	8123
Atp1a2	ATPase, Na+/K+ transporting, alpha 2 polypeptide	0.505435	0.690308	2578.5	749.5	1160	1249.5
Atp1a3	ATPase, Na+/K+ transporting, alpha 3 polypeptide	0.167546	0.935167	593	4315	1960	2114
Atp1a4	ATPase, Na+/K+ transporting, alpha 4 polypeptide	-0.482875	0.850967	7.5	3.5	7	10.5
Atp1b1	ATPase, Na+/K+ transporting, beta 1 polypeptide	0.926117	0.0409346	2429.5	6832.5	2158	2500.5
Atp1b2	ATPase, Na+/K+ transporting, beta 2 polypeptide	0.922318	0.122553	873	353	309	351
Atp1b3	ATPase, Na+/K+ transporting, beta 3 polypeptide	-0.122659	0.653614	3350	4861	4092	4636
Atp1b4	ATPase, (Na+)/K+ transporting, beta 4 polypeptide	-1.47528	0.158432	42	16	71	94
Atp2a1	ATPase, Ca++ transporting, cardiac muscle, fast twitch 1	0.59745	0.628367	42889	10973	17238	19541.5
Atp2a2	ATPase, Ca++ transporting, cardiac muscle, slow twitch 2	0.0834631	0.818185	4126	4053	3478	4182
Atp2a3	ATPase, Ca++ transporting, ubiquitous	0.528414	0.00879843	613	650	393	473
Atp2b1	ATPase, Ca++ transporting, plasma membrane 1	0.500737	0.0548015	1704	2677	1378	1642
Atp2b3	ATPase, Ca++ transporting, plasma membrane 3	0.342172	0.878108	49	11	29	19
Atp2b4	ATPase, Ca++ transporting, plasma membrane 4	-0.540226	0.525671	327	415	474	588
Atp2c1	ATPase, Ca++-sequestering	-0.036579	0.903668	1315	1532	1283	1600
Atp2c2	ATPase, Ca++ transporting, type 2C, member 2	-2.79386	0.136291	8	1	33	31
Atp4a	ATPase, H+/K+ exchanging, gastric, alpha polypeptide	-2.21063	NA	2	3	15	7
Atp5a1	ATP synthase, H+ transporting, mitochondrial F1 complex, alpha subunit 1	-0.0211656	0.936785	8811	9371	8456	9774
Atp5b	ATP synthase, H+ transporting mitochondrial F1 complex, beta subunit	-0.316958	0.00920248	12814	14679	15634	18116
Atp5c1	ATP synthase, H+ transporting, mitochondrial F1 complex, gamma polypeptide 1	0.035389	0.920068	3137	3216	2811	3327
Atp5d	ATP synthase, H+ transporting, mitochondrial F1 complex, delta subunit	-0.611113	8.72e-05	2079	2096	2966	3340
Atp5e	ATP synthase, H+ transporting, mitochondrial F1 complex, epsilon subunit	-0.179841	0.605359	3485	3275	3475	4133
Atp5f1	-	-0.0378648	0.899765	3003	3544	2955	3678
Atp5g1	ATP synthase, H+ transporting, mitochondrial F0 complex, subunit C1 (subunit 9)	-0.127181	0.674602	1371	1341	1386	1545
Atp5g2	ATP synthase, H+ transporting, mitochondrial F0 complex, subunit C2 (subunit 9)	-0.0926079	0.787004	4575	4315	4262	5161
Atp5g3	ATP synthase, H+ transporting, mitochondrial F0 complex, subunit C3 (subunit 9)	-0.314337	0.196608	2894	2969	3225	4006
Atp5h	ATP synthase, H+ transporting, mitochondrial F0 complex, subunit D	-0.218342	0.302181	2837	2879	3007	3581
ATP5I	-	-0.0134999	0.976208	1141	1081	1029	1196
Atp5j	ATP synthase, H+ transporting, mitochondrial F0 complex, subunit F	-0.0874182	0.775637	1935.33	2287.33	2016	2403.83
Atp5j2	ATP synthase, H+ transporting, mitochondrial F0 complex, subunit F2	0.0116859	0.979956	3435	3181	2963	3563
Atp5l	ATP synthase, H+ transporting, mitochondrial F0 complex, subunit G	-0.395047	0.0990155	3633	3723	4332	5255
Atp5o	ATP synthase, H+ transporting, mitochondrial F1 complex, O subunit	-0.121263	0.715939	3058	2834	2884	3490
Atp5s	-	-0.147888	0.85027	114	87	112	109
ATP5SL	-	0.325814	0.19131	680	762	515	621
Atp6ap1	ATPase, H+ transporting, lysosomal accessory protein 1	-0.276283	0.0796474	3868	4843	4743	5629
Atp6ap2	ATPase, H+ transporting, lysosomal accessory protein 2	-0.660659	0.0107263	1064	1851	2053	2425
Atp6v0a1	ATPase, H+ transporting, lysosomal V0 subunit A1	-0.0788011	0.75697	1358.5	1630.5	1451	1651.5
Atp6v0a2	ATPase, H+ transporting, lysosomal V0 subunit A2	0.232584	0.517907	330	492	306	379
Atp6v0a4	ATPase, H+ transporting, lysosomal V0 subunit A4	-1.47374	0.103176	19	16	49	47
Atp6v0b	ATPase, H+ transporting, lysosomal V0 subunit B	-1.07968	0.000243647	1436	1781	3115	3563
Atp6v0c	ATPase, H+ transporting, lysosomal V0 subunit C	-0.583009	0.0155983	6852	10178	11397	13527
Atp6v0d1	ATPase, H+ transporting, lysosomal V0 subunit D1	0.0719656	0.807353	3756	4796	3681	4307.5
Atp6v0d2	ATPase, H+ transporting, lysosomal V0 subunit D2	-1.60667	0.232962	187	1212	1781	2221
ATP6V0E1	-	-0.46651	0.068	2216	2986	3217	3832
Atp6v0e2	ATPase, H+ transporting, lysosomal V0 subunit E2	-0.0345291	0.959	191	176	172	201
Atp6v1a	ATPase, H+ transporting, lysosomal V1 subunit A	-0.770917	0.000125918	2440	3611	4650	5435
Atp6v1b1	ATPase, H+ transporting, lysosomal V1 subunit B1	0.215572	NA	2	10	3	7
Atp6v1b2	ATPase, H+ transporting, lysosomal V1 subunit B2	-1.19186	2.61e-06	3445	5770	9374	11105
Atp6v1c1	ATPase, H+ transporting, lysosomal V1 subunit C1	-0.524109	0.039313	1214	1687	1859	2229
Atp6v1c2	ATPase, H+ transporting, lysosomal V1 subunit C2	-1.41586	0.138054	31	13	61.5	56.5
Atp6v1d	ATPase, H+ transporting, lysosomal V1 subunit D	-0.581792	0.0215368	1819	2253	2781	3207
Atp6v1e1	ATPase, H+ transporting, lysosomal V1 subunit E1	-0.797826	0.00340123	1698	2200	2986	3677
Atp6v1e2	ATPase, H+ transporting, lysosomal V1 subunit E2	-0.331116	0.86666	13	11	14	16
Atp6v1f	ATPase, H+ transporting, lysosomal V1 subunit F	-0.564315	0.0137979	1311	1545	1942	2213
Atp6v1g1	ATPase, H+ transporting, lysosomal V1 subunit G1	-0.458446	0.0342056	4266	4454	5428	6429
Atp6v1h	ATPase, H+ transporting, lysosomal V1 subunit H	-0.571072	0.0136784	1028	1617	1720	2118.5
Atp7a	ATPase, Cu++ transporting, alpha polypeptide	0.446139	0.267903	471	726	410	445
Atp7b	ATPase, Cu++ transporting, beta polypeptide	-1.10238	NA	8	2	10	12
Atp8b1	ATPase, class I, type 8B, member 1	0.833569	0.00132499	415	467	226	262
Atp8b2	ATPase, class I, type 8B, member 2	0.175944	0.614064	1714	2634.5	1713.5	2043.17
Atp9b	ATPase, class II, type 9B	-0.163937	0.503164	831	923	872	1070
Atpaf1	ATP synthase mitochondrial F1 complex assembly factor 1	-0.174979	0.725689	175.5	191	189	220
Atpaf2	ATP synthase mitochondrial F1 complex assembly factor 2	0.0347562	0.950781	292	320	255	337
Atpif1	ATPase inhibitory factor 1	-0.620891	7.52e-05	1833	2020	2681	3170
Atraid	all-trans retinoic acid induced differentiation factor	0.34767	0.117873	603	703.5	480	530.5
Atrip	ATR interacting protein	-0.150543	0.776494	172.5	179	171	215
Atrn	attractin	0.0360227	0.90268	1480	1716	1405	1668
Atxn1	ataxin 1	0.437605	0.535194	131	128	69	123
Atxn10	ataxin 10	0.128763	0.597212	1652	2207	1627	1829
Atxn2l	ataxin 2-like	-0.171152	0.572787	1104	1317	1259	1421
Atxn3	ataxin 3	-0.0202324	0.972691	354	389	319	428
Atxn7l3b	ataxin 7-like 3B	0.114573	0.640429	1063	1225	1001	1076
Auh	AU RNA binding protein/enoyl-coenzyme A hydratase	0.0226385	0.968276	242	273	229.5	270
Aup1	ancient ubiquitous protein 1	-0.192957	0.397019	1450	1673	1562	1965
Aurka	aurora kinase A	-0.643934	0.0218971	178	213	273	329
Aurkaip1	aurora kinase A interacting protein 1	0.117053	0.755343	953	1186	884	1056
Aurkb	aurora kinase B	-0.38413	0.405517	223	430	399	424
Aurkc	aurora kinase C	-0.556645	0.409407	51	48	69	75
Aven	apoptosis, caspase activation inhibitor	-0.153936	0.77651	148	145.5	148	175.5
Avil	advillin	-0.156028	0.889122	48	32	43	46
Avpi1	arginine vasopressin-induced 1	-0.817707	0.00062038	703	613	1123	1176
Avpr1a	arginine vasopressin receptor 1A	1.72911	0.00076926	160	180	56	44
Avpr2	arginine vasopressin receptor 2	-0.796637	NA	3	4	5	7
Awat1	acyl-CoA wax alcohol acyltransferase 1	-3.07256	0.00802428	6	3	41	34
Awat2	acyl-CoA wax alcohol acyltransferase 2	-2.66857	0.000876559	11	10	70	61
Axin2	axin 2	-0.685279	0.290587	75	69	133	93
Axl	AXL receptor tyrosine kinase	1.09015	0.00011852	4018	7800	2468	2903
Azi2	5-azacytidine induced gene 2	0.0745857	0.82723	570	734	553	664
Azin1	antizyme inhibitor 1	-0.298128	0.145237	1391	1857	1764	2158
Azin2	antizyme inhibitor 2	-1.08904	0.18809	26	27	40	73
B2m	beta-2 microglobulin	-0.0674879	0.864309	47084	75881	57817	67633
B3galnt1	UDP-GalNAc:betaGlcNAc beta 1,3-galactosaminyltransferase, polypeptide 1	0.242456	0.276328	1227	1501	1073	1191
B3galnt2	UDP-GalNAc:betaGlcNAc beta 1,3-galactosaminyltransferase, polypeptide 2	0.130494	0.721	619.5	598.5	502.5	602.5
B3galt1	UDP-Gal:betaGlcNAc beta 1,3-galactosyltransferase, polypeptide 1	1.9759	NA	7	5	2	1
B3galt4	UDP-Gal:betaGlcNAc beta 1,3-galactosyltransferase, polypeptide 4	-0.277399	0.713935	63	62	69	81
B3galt5	UDP-Gal:betaGlcNAc beta 1,3-galactosyltransferase, polypeptide 5	0.536884	NA	2	4	2	2
B3galt6	UDP-Gal:betaGal beta 1,3-galactosyltransferase, polypeptide 6	0.638638	0.124691	140.5	206	103	114
B3gat3	beta-1,3-glucuronyltransferase 3 (glucuronosyltransferase I)	-0.222083	0.325747	897	1052	1033	1206
B3GNT1	-	0.45993	0.122553	359	360	242	275
B3gnt2	UDP-GlcNAc:betaGal beta-1,3-N-acetylglucosaminyltransferase 2	0.0499323	0.909808	665	631	586	654
B3gnt5	UDP-GlcNAc:betaGal beta-1,3-N-acetylglucosaminyltransferase 5	-1.62344	0.110102	24	12	58	53
B3gnt7	UDP-GlcNAc:betaGal beta-1,3-N-acetylglucosaminyltransferase 7	0.844621	0.0869578	182	210	115	98
B3gnt8	UDP-GlcNAc:betaGal beta-1,3-N-acetylglucosaminyltransferase 8	-1.03281	0.42585	33	15	43	57
B3gntl1	UDP-GlcNAc:betaGal beta-1,3-N-acetylglucosaminyltransferase-like 1	0.0215851	0.984516	56	68	57	63
B4galnt1	beta-1,4-N-acetyl-galactosaminyl transferase 1	-0.640699	0.0830924	127	139	175.5	235
B4galnt3	beta-1,4-N-acetyl-galactosaminyl transferase 3	-2.30295	NA	3	1	9	11
B4galnt4	beta-1,4-N-acetyl-galactosaminyl transferase 4	-1.92171	0.146018	24	6	59	57
B4galt1	UDP-Gal:betaGlcNAc beta 1,4- galactosyltransferase, polypeptide 1	0.705777	4.1e-05	1418	1932	938	1073
B4galt2	UDP-Gal:betaGlcNAc beta 1,4- galactosyltransferase, polypeptide 2	0.389337	0.157451	354	376	267	282
B4galt3	UDP-Gal:betaGlcNAc beta 1,4-galactosyltransferase, polypeptide 3	-0.272383	0.361122	275	328	315	404
B4galt4	UDP-Gal:betaGlcNAc beta 1,4-galactosyltransferase, polypeptide 4	1.03331	0.0036588	279	263	119	144
B4galt5	UDP-Gal:betaGlcNAc beta 1,4-galactosyltransferase, polypeptide 5	0.0336961	0.912548	1033	1295	1052	1180
B4galt6	UDP-Gal:betaGlcNAc beta 1,4-galactosyltransferase, polypeptide 6	-0.242331	0.382206	747	728	778	954
B4galt7	xylosylprotein beta1,4-galactosyltransferase, polypeptide 7 (galactosyltransferase I)	0.446102	0.109083	503	477	340	372
B9d1	B9 protein domain 1	0.0185722	0.975087	234	250	225	246
B9d2	B9 protein domain 2	-0.0572348	0.940008	136	151	163	128
Baalc	brain and acute leukemia, cytoplasmic	0.146801	0.940448	45	20	32	27
Babam1	BRISC and BRCA1 A complex member 1	-0.167206	0.518465	612	734	690	797
Bace1	beta-site APP cleaving enzyme 1	0.362703	0.304113	340	332	260	255
Bace2	beta-site APP-cleaving enzyme 2	0.502504	0.154064	416	344	229	308
Bach1	BTB and CNC homology 1, basic leucine zipper transcription factor 1	-0.355712	0.237	475.5	594.5	612	735.25
Bad	BCL2-associated agonist of cell death	-0.309724	0.209009	512	567	641.5	673
Bag1	BCL2-associated athanogene 1	0.120177	0.604661	1418	1757	1295	1581
Bag2	BCL2-associated athanogene 2	0.138188	0.797029	213	232	178	222
Bag3	BCL2-associated athanogene 3	-0.356417	0.1323	538	535	657	699
Bag4	BCL2-associated athanogene 4	0.386758	0.470368	145.5	252.5	115	184.5
Bag5	BCL2-associated athanogene 5	0.130436	0.725924	482	581	445	510
Bag6	BCL2-associated athanogene 6	-0.351665	0.109141	1316.5	1492	1704.5	1818
BAI1	-	-0.587038	0.714879	15	12	14	27
Baiap2	brain-specific angiogenesis inhibitor 1-associated protein 2	-0.445572	0.179602	635	697.17	864.5	921.33
Baiap2l1	BAI1-associated protein 2-like 1	-1.08298	0.0426197	46	65	109	121
Baiap2l2	BAI1-associated protein 2-like 2	-1.75768	0.00070475	37	31	116	111
Bak1	BCL2-antagonist/killer 1	-0.201506	0.473687	876	1281	1095	1333
Bambi	BMP and activin membrane-bound inhibitor	-2.14298	8.06e-05	158	77	518	529
Banf1	BAF nuclear assembly factor 1	-0.192466	0.432202	1578	1653.5	1643	2015
Bank1	B cell scaffold protein with ankyrin repeats 1	0.712627	0.580575	14	39	15	16
Banp	BTG3 associated nuclear protein	0.0989252	0.884841	209	328	205	287
Bap1	Brca1 associated protein 1	-0.0264292	0.931013	1236	1395	1230	1411
Bard1	BRCA1 associated RING domain 1	0.070996	0.952603	46	106	54	87
Basp1	brain abundant, membrane attached signal protein 1	0.676931	0.189139	282	499	221	253
Batf	basic leucine zipper transcription factor, ATF-like	-0.725544	0.134181	93	100	132	185
Batf3	basic leucine zipper transcription factor, ATF-like 3	0.26031	0.811427	50	72	51	48
Bax	BCL2-associated X protein	-0.593558	0.00396	614	667	926	976
Baz1a	bromodomain adjacent to zinc finger domain 1A	-0.538032	0.00604239	531	636	775	892
Baz1b	bromodomain adjacent to zinc finger domain, 1B	0.20575	0.329461	1487	1958	1333	1600
Baz2a	bromodomain adjacent to zinc finger domain, 2A	-0.225045	0.562362	646	717	712	862
Baz2b	bromodomain adjacent to zinc finger domain, 2B	0.118181	0.76031	481	572.5	434	522.5
Bbc3	BCL2 binding component 3	-0.495711	0.560358	37	65	79	59
Bbox1	butyrobetaine (gamma), 2-oxoglutarate dioxygenase 1 (gamma-butyrobetaine hydroxylase)	-2.28843	0.227574	7	1	20	20
Bbs1	Bardet-Biedl syndrome 1 (human)	0.373792	0.299867	215	243	165	183
Bbs10	Bardet-Biedl syndrome 10 (human)	0.262175	0.682525	121	110	82	110
Bbs2	Bardet-Biedl syndrome 2 (human)	0.0666302	0.879149	282	355	274	324
Bbs4	Bardet-Biedl syndrome 4 (human)	-0.0282751	0.956878	242.5	307	239	313
Bbs5	Bardet-Biedl syndrome 5 (human)	0.0128793	0.98975	83	105	93	89
Bbs7	Bardet-Biedl syndrome 7 (human)	0.121124	0.776494	250	303	241	258
Bbx	bobby sox HMG box containing	0.403367	0.482319	87	116	66	85
Bcam	basal cell adhesion molecule	0.191202	0.742138	1157	756	803	878
Bcap29	B cell receptor associated protein 29	-0.469009	0.0752631	434	566	672	680
Bcap31	B cell receptor associated protein 31	-0.0740973	0.83488	2391	3098.5	2555	3125
Bcar1	breast cancer anti-estrogen resistance 1	0.126208	0.808561	474	454	384	460
Bcar3	breast cancer anti-estrogen resistance 3	-0.227291	0.716957	194	422	320	376
Bcas1	breast carcinoma amplified sequence 1	-2.7722	NA	1	2	9	11
Bcas2	breast carcinoma amplified sequence 2	0.00600861	0.992897	558	641	569	604
Bcas3	breast carcinoma amplified sequence 3	-0.234552	0.407269	388	474	435	566
Bcat1	branched chain aminotransferase 1, cytosolic	0.0385049	0.944511	2500	4567.5	3054	3621
Bcat2	branched chain aminotransferase 2, mitochondrial	-0.00202459	0.996919	849	1020	869	970
Bccip	BRCA2 and CDKN1A interacting protein	0.0602708	0.893605	515	570.5	487	538.5
Bcdin3d	BCDIN3 domain containing	-0.509227	0.477951	44	39	56	61
Bche	butyrylcholinesterase	1.46677	0.503263	19	9	7	3
Bckdha	branched chain ketoacid dehydrogenase E1, alpha polypeptide	0.328295	0.228242	887	938	647	792
Bckdhb	branched chain ketoacid dehydrogenase E1, beta polypeptide	0.104349	0.832062	538	470	443	488
Bckdk	branched chain ketoacid dehydrogenase kinase	-0.115088	0.695427	1062.5	1061	1001.5	1282.5
Bcl10	B cell leukemia/lymphoma 10	-0.0959252	0.73424	801	904	843	952
Bcl11a	B cell CLL/lymphoma 11A (zinc finger protein)	-0.768127	0.445413	30	17	33	48
Bcl11b	B cell leukemia/lymphoma 11B	-0.0446703	0.972748	48	48	53	44
Bcl2	B cell leukemia/lymphoma 2	0.0624203	0.972212	23	25	24	21
BCL2A1	-	-0.534663	0.206243	1054	2115	2005	2438
Bcl2l1	BCL2-like 1	-0.405801	0.0359206	536	685	740	848
Bcl2l11	BCL2-like 11 (apoptosis facilitator)	-0.320715	0.241119	307	348	361	447
Bcl2l12	BCL2-like 12 (proline rich)	-0.361504	0.224198	243	299.5	332	352
Bcl2l13	BCL2-like 13 (apoptosis facilitator)	0.288214	0.548253	150	202	136	146
Bcl2l14	BCL2-like 14 (apoptosis facilitator)	-0.387103	0.75523	27	86	46	98
Bcl2l15	BCLl2-like 15	-2.74848	NA	4	1	17	17
Bcl2l2	BCL2-like 2	0.0341774	0.943542	555	713	539	680
Bcl3	B cell leukemia/lymphoma 3	-0.306508	0.434515	307	272	326	386
Bcl6	B cell leukemia/lymphoma 6	0.0155856	0.977228	341	433	319	437
Bcl6b	B cell CLL/lymphoma 6, member B	0.619346	0.0260918	321	355	202	232
Bcl7b	B cell CLL/lymphoma 7B	0.00801213	0.988974	348	460	366	422
Bcl7c	B cell CLL/lymphoma 7C	-0.252115	0.319296	396	440.5	470.5	509.5
Bcl9l	B cell CLL/lymphoma 9-like	0.435695	0.137957	737	847	534	620
Bclaf1	BCL2-associated transcription factor 1	0.25427	0.288659	1547	1914	1251.5	1610
Bco1	beta-carotene oxygenase 1	-1.36611	NA	5	5	8	18
Bco2	beta-carotene oxygenase 2	-0.231514	0.77753	68	57	75	70
Bcor	BCL6 interacting corepressor	0.125407	0.740699	381	488	364	418
Bcorl1	BCL6 co-repressor-like 1	0.645315	0.111343	177	307	146	154
Bcs1l	BCS1-like (yeast)	-0.186633	0.737534	124	174	155	177
Bdh1	3-hydroxybutyrate dehydrogenase, type 1	-1.29409	1.95e-06	150	144	352	359
Bdh2	3-hydroxybutyrate dehydrogenase, type 2	0.0756694	0.902497	349	307	265	357
Bdkrb1	bradykinin receptor, beta 1	-1.33866	0.0849509	12	14	28	37
Bdkrb2	bradykinin receptor, beta 2	0.718943	0.238808	267	168	129	136
Bdp1	B double prime 1, subunit of RNA polymerase III transcription initiation factor IIIB	-0.314823	0.768682	25	29	32	34
Becn1	beclin 1, autophagy related	-0.0570556	0.858038	1045	1374.5	1146	1322.5
Begain	brain-enriched guanylate kinase-associated	-0.710996	0.360574	43	39	63	70
Bend5	BEN domain containing 5	-0.0144268	0.993638	31	16	21	27
Bend6	BEN domain containing 6	0.107258	0.866244	154	251	165	202
Bend7	BEN domain containing 7	0.918696	NA	4	15	1	9
Best3	bestrophin 3	-0.0327444	NA	15	3	9	10
Bet1	Bet1 golgi vesicular membrane trafficking protein	0.175062	0.470612	1029	1225	859	1113
Bet1l	Bet1 golgi vesicular membrane trafficking protein like	0.558925	0.00286806	749	923	492	627
Bex1	brain expressed X-linked 1	-1.84604	0.0678794	19	9	44.5	57.5
Bex2	brain expressed X-linked 2	-0.119507	NA	5	5	3	8
Bfar	bifunctional apoptosis regulator	0.395643	0.185527	504.5	774.5	410	542.5
Bfsp1	beaded filament structural protein 1, in lens-CP94	0.173611	0.83488	65	82	68	59
Bfsp2	beaded filament structural protein 2, phakinin	-1.80605	NA	5	0	10	8
Bgn	biglycan	0.972294	2.24e-06	25246	36784	14234.2	16660.5
Bhlhb9	basic helix-loop-helix domain containing, class B9	0.188144	0.735	218	230	206	179
Bhlhe22	basic helix-loop-helix family, member e22	-0.180455	0.929344	33	13	25	28
Bhlhe23	basic helix-loop-helix family, member e23	-2.98441	0.130731	8	0	32	34
Bhlhe40	basic helix-loop-helix family, member e40	0.185585	0.534119	1887	2246	1672	1902
Bicc1	BicC family RNA binding protein 1	0.945887	3.54e-06	555	716	305	342
Bicd1	BICD cargo adaptor 1	0.605436	0.531812	64	52	35	41
Bicd2	BICD cargo adaptor 2	-0.0804494	0.820844	1087	1589	1326	1432
Bid	BH3 interacting domain death agonist	0.00399267	0.994918	246	332	255	311
Bik	BCL2-interacting killer	0.0480926	0.975087	42	30	29	41
Bin1	bridging integrator 1	0.116204	0.820253	2365	1698	1688	2077
Bin2	bridging integrator 2	-0.515313	0.0487328	405.5	627.5	655	789
BIN2A	-	-2.31374	NA	3	1	10	10
Bin3	bridging integrator 3	-0.107552	0.725561	591	753	637	788
Birc2	baculoviral IAP repeat-containing 2	-0.249708	0.59135	736	1357.5	1123	1289
Birc3	baculoviral IAP repeat-containing 3	-0.490786	0.143152	268	423.5	413	539
Birc5	baculoviral IAP repeat-containing 5	-0.320702	0.550893	94	149	131	166
Birc6	baculoviral IAP repeat-containing 6	0.251858	0.252818	2165.5	2993	1953	2290.5
Bivm	basic, immunoglobulin-like variable motif containing	0.348275	0.32086	330	397	274	286
Blcap	bladder cancer associated protein	-0.104017	0.768281	492	502	494	562
BLES03	-	0.0791258	0.810509	611	681	531	679
Blk	B lymphoid kinase	-0.0752565	0.961227	24.5	26	24	27.5
Blmh	bleomycin hydrolase	-0.199605	0.288659	1178	1367	1339	1539
Blnk	B cell linker	0.237057	0.648636	437	867	455	621
Bloc1s1	biogenesis of lysosomal organelles complex-1, subunit 1	-0.240357	0.333117	1051	1128	1145	1402
Bloc1s2	biogenesis of lysosomal organelles complex-1, subunit 2	-0.403158	0.158903	534	827	797	961
Bloc1s4	biogenesis of lysosomal organelles complex-1, subunit 4, cappuccino	-0.18405	0.691417	197	184	200	229
Bloc1s5	biogenesis of lysosomal organelles complex-1, subunit 5, muted	0.0216528	0.967838	355	496	386	434
Bloc1s6	biogenesis of lysosomal organelles complex-1, subunit 6, pallidin	0.0457705	0.932502	305	314	252	344.5
Blvra	biliverdin reductase A	-0.283378	0.502296	986.5	1685	1478	1678.5
Blvrb	biliverdin reductase B (flavin reductase (NADPH))	-0.571061	0.00143165	906.5	1192	1389.5	1671
Blzf1	basic leucine zipper nuclear factor 1	0.192363	0.5793	345	433	333	333
Bmf	BCL2 modifying factor	0.262241	0.630248	210	178	156	165
Bmi1	Bmi1 polycomb ring finger oncogene	0.599589	0.0640344	191	259	136	155
Bmp1	bone morphogenetic protein 1	0.454002	0.146491	2704	4201	2282.5	2630
Bmp15	bone morphogenetic protein 15	1.51315	NA	11	9	3	4
Bmp2	bone morphogenetic protein 2	0.128991	0.911717	29	36	31	27
Bmp3	bone morphogenetic protein 3	1.65428	0.159222	17	123	17	25
Bmp4	bone morphogenetic protein 4	0.406185	0.504002	362.67	216	206	233.5
Bmp5	bone morphogenetic protein 5	1.76913	0.196332	210	29	29	45
Bmp6	bone morphogenetic protein 6	1.01527	0.432526	23	50	23	11
Bmp7	bone morphogenetic protein 7	-0.0390238	0.962314	201	428	308	313
Bmp8a	bone morphogenetic protein 8a	-4.34558	0.0172036	8	0	80.5	90
Bmper	BMP-binding endothelial regulator	-0.179487	0.85406	199	95	161	176
Bmpr1a	bone morphogenetic protein receptor, type 1A	0.336214	0.140061	709	827	542	658
Bmpr1b	bone morphogenetic protein receptor, type 1B	0.480079	0.808262	25	25	20	15
Bmpr2	bone morphogenetic protein receptor, type II (serine/threonine kinase)	0.290767	0.426558	567	641	434	542
Bms1	BMS1, ribosome biogenesis factor	0.0545632	0.875563	596	709	556	683
Bmx	BMX non-receptor tyrosine kinase	1.64684	0.0304988	56	42	17	14
Bmyc	brain expressed myelocytomatosis oncogene	0.556897	0.316809	139	109	79	89
Bnc1	basonuclin 1	-3.3238	0.250539	28	6	155.5	197.5
Bnc2	basonuclin 2	0.263331	0.523376	253	347	210	282
Bnip1	BCL2/adenovirus E1B interacting protein 1	-0.0415118	0.936944	304	315	290	340
Bnip2	BCL2/adenovirus E1B interacting protein 2	0.139818	0.66772	873	1250	882	1001
Bnip3	BCL2/adenovirus E1B interacting protein 3	0.292148	0.548228	1641.5	1843	1325	1478.5
Bnip3l	BCL2/adenovirus E1B interacting protein 3-like	0.210994	0.419035	2804	3339	2365	2866
Bnipl	BCL2/adenovirus E1B 19kD interacting protein like	-2.84675	0.189968	46	14	230	210
Bod1	biorientation of chromosomes in cell division 1	-0.0505136	0.931056	247	245	244	259
Bok	BCL2-related ovarian killer	-0.377955	0.587451	261	198	291	303
Bola1	bolA-like 1 (E. coli)	0.235527	0.655745	147	157	126	128
Bola3	bolA-like 3 (E. coli)	-0.331818	0.392064	176	181	207	237
Bop1	block of proliferation 1	-0.420741	0.0351502	536	579	693	779
Bora	bora, aurora kinase A activator	-0.369119	0.51113	80	134.5	127	142
Bpgm	2,3-bisphosphoglycerate mutase	0.469444	0.138504	1147	1077	773	816
Bphl	biphenyl hydrolase-like (serine hydrolase, breast epithelial mucin-associated antigen)	0.303817	0.661279	120	135	77	129
Bpifb1	BPI fold containing family B, member 1	-3.49758	0.160332	0	1	6	5
Bpifc	BPI fold containing family C	-3.0151	0.210292	38	6	163	209
Bpnt1	bisphosphate 3'-nucleotidase 1	0.030728	0.953094	354	521	382	456
Brap	BRCA1 associated protein	-0.470406	0.049842	435	492	566	703
Brca1	breast cancer 1, early onset	-0.315468	0.603099	74	120	105	131
Brca2	breast cancer 2, early onset	-0.0034418	0.995814	210	246	217	232
Brcc3	BRCA1/BRCA2-containing complex, subunit 3	0.00856569	0.986189	537	785	578	709
Brd1	bromodomain containing 1	-0.283994	0.243818	497	571	588	694
Brd2	bromodomain containing 2	-0.0852812	0.760599	2024	2014	1955	2289
Brd3	bromodomain containing 3	0.109837	0.808262	331	402	288.5	383
Brd4	bromodomain containing 4	-0.302913	0.173688	901	1060	1129	1249
Brd7	bromodomain containing 7	-0.137278	0.602973	801	1057.5	909.5	1098.5
Brd8	bromodomain containing 8	-0.10489	0.780223	422	520	468	527
Brd9	bromodomain containing 9	-0.0928389	0.786054	477	571	508	592.5
BRE	-	0.284914	0.405976	771	971	646	759
Brf1	BRF1, RNA polymerase III transcription initiation factor 90 kDa subunit	-0.113479	0.776698	273	308	292	327
Brf2	BRF2, RNA polymerase III transcription initiation factor 50kDa subunit	-0.421876	0.346689	130	147	168	198
Bri3	brain protein I3	-0.167591	0.567469	476	582	516	656
Bri3bp	Bri3 binding protein	-0.133915	0.863	82	132	106	123
Brinp1	bone morphogenic protein/retinoic acid inducible neural specific 1	0.0561222	NA	10	1	5	6
Brinp2	bone morphogenic protein/retinoic acid inducible neural-specific 2	-1.02822	NA	9	3	11	14
Brinp3	bone morphogenetic protein/retinoic acid inducible neural specific 3	2.70945	0.174517	4	16	0	3
Brix1	BRX1, biogenesis of ribosomes	-0.20289	0.503108	429	486	460	581
Brk1	BRICK1, SCAR/WAVE actin-nucleating complex subunit	0.0598037	0.880139	2511	3309	2534	2941
Brms1	breast cancer metastasis-suppressor 1	-0.459786	0.0102541	942	995	1221	1411
Brms1l	breast cancer metastasis-suppressor 1-like	0.287313	0.267889	478	538.67	361.67	462.5
Brox	BRO1 domain and CAAX motif containing	0.0721197	0.786169	1122	1345	1041	1272
Brpf1	bromodomain and PHD finger containing, 1	-0.485186	0.18676	361	290	432	475
Brpf3	bromodomain and PHD finger containing, 3	0.264154	0.612456	114	132	83	120
Brsk1	BR serine/threonine kinase 1	-0.14163	0.864821	81.5	78.5	87.5	86
Bscl2	Berardinelli-Seip congenital lipodystrophy 2 (seipin)	0.0828767	0.792	743	828	663	802
Bsdc1	BSD domain containing 1	0.00490556	0.991565	713	836	683	840
Bsg	basigin	0.052076	0.861189	4697	6315	4883	5514
Bsn	bassoon	0.805612	0.658608	8	17	5	9
Bspry	B-box and SPRY domain containing	-2.37158	0.00164144	75	31	253	306
Bst1	bone marrow stromal cell antigen 1	0.0846819	0.843279	362	549	388	451
Bst2	bone marrow stromal cell antigen 2	-0.167491	0.789768	1177	2534	1785	2244
Btaf1	B-TFIID TATA-box binding protein associated factor 1	-0.384672	0.0773002	725	953	1050	1091
Btbd1	BTB (POZ) domain containing 1	0.355568	0.106791	1630	1546	1150	1311
Btbd10	BTB (POZ) domain containing 10	0.127741	0.759435	318	437	306	372
Btbd16	BTB (POZ) domain containing 16	-0.872069	NA	2	7	6	10
Btbd3	BTB (POZ) domain containing 3	-0.813432	0.179331	203	107	254	297
Btbd6	BTB (POZ) domain containing 6	0.33204	0.199424	472	525	348	435
Btbd7	BTB (POZ) domain containing 7	0.23958	0.465781	375	495	326	398
Btbd9	BTB (POZ) domain containing 9	0.320717	0.526399	147	198	124	147
Btc	betacellulin, epidermal growth factor family member	1.05051	NA	9	3	2	4
Btd	biotinidase	0.648928	0.00882796	468	650	332	365
Btf3	basic transcription factor 3	-0.0836045	0.696593	3628.5	4038.5	3668.5	4351.5
Btg1	BTG anti-proliferation factor 1	-0.326943	0.234	2213.5	2841	2876	3348
Btg2	BTG anti-proliferation factor 2	-0.479804	0.371806	838	829	1055	1250
Btg3	-	-0.10673	0.85766	317	301	298	363
Btk	Bruton agammaglobulinemia tyrosine kinase	0.11346	0.843999	276	530	346	374
Btla	B and T lymphocyte associated	0.687234	NA	8	8	3	7
BTN3A2	-	2.48743	0.0937401	7.25	27.58	2.5	4
BTNL5	-	0.142669	0.964712	4	7.9	1	10.2
BTNL7	-	1.20535	0.294907	14	52.95	9.5	18.1
BTNL8	-	0.827357	0.626016	8.58	8.82	5	4.53
Btrc	beta-transducin repeat containing protein	0.337312	0.29439	275	331	210	263
Bub1	BUB1, mitotic checkpoint serine/threonine kinase	0.0135487	0.980799	374	567	416	495
Bub1b	BUB1B, mitotic checkpoint serine/threonine kinase	-0.0436621	0.954154	166	297	218	245
Bub3	BUB3 mitotic checkpoint protein	-0.173386	0.486361	910	1043	1028	1139
Bud13	BUD13 homolog	0.184197	0.67995	307	285	239	277.5
Bud31	BUD31 homolog	-0.0594979	0.886	847	830.5	798	933.5
Bves	blood vessel epicardial substance	0.138658	0.935167	71	24	50	37
Bysl	bystin-like	-0.156819	0.634965	348	385	374	432
Bzw1	basic leucine zipper and W2 domains 1	0.19978	0.276	2837	3305	2418.5	2851.5
Bzw2	basic leucine zipper and W2 domains 2	-0.197741	0.512325	593	609	627	737
C1d	C1D nuclear receptor co-repressor	-0.140289	0.611736	582	699	637	753
C1galt1	core 1 synthase, glycoprotein-N-acetylgalactosamine 3-beta-galactosyltransferase, 1	1.01071	0.00644635	363	625	238	236
C1galt1c1	C1GALT1-specific chaperone 1	0.00301118	0.995814	355	379	323	402
C1qa	complement component 1, q subcomponent, alpha polypeptide	1.28307	0.00194501	12303	14979	5181	5830
C1qb	complement component 1, q subcomponent, beta polypeptide	1.54684	0.000492	8133	9717	2760	3255
C1qbp	complement component 1, q subcomponent binding protein	-0.463466	0.00515	792	962	1107	1271
C1qc	complement component 1, q subcomponent, C chain	1.51835	0.000144794	13096	15666	4624	5247
C1ql3	C1q-like 3	1.10634	0.460055	10	17	8	4
C1qtnf1	C1q and tumor necrosis factor related protein 1	1.05284	9.51e-07	1871	2610	1036	1069
C1qtnf2	C1q and tumor necrosis factor related protein 2	1.43802	2.82e-12	1899	2137	700	766
C1qtnf3	C1q and tumor necrosis factor related protein 3	1.53328	2e-05	1796	1751	568	646
C1qtnf4	C1q and tumor necrosis factor related protein 4	-0.897582	NA	7	2	9	8
C1qtnf5	C1q and tumor necrosis factor related protein 5	0.420646	0.0856323	1540	1391	1022	1152
C1qtnf6	C1q and tumor necrosis factor related protein 6	0.892755	2.29e-05	5286	8627	3482	3792
C1qtnf7	C1q and tumor necrosis factor related protein 7	0.623838	0.371052	288	475	221	261
C1qtnf9	C1q and tumor necrosis factor related protein 9	1.77315	4.87e-05	138	209	47	52
C1R	-	0.867281	0.00143702	12028	20396	8099	9153
C1rl	complement component 1, r subcomponent-like	0.413848	0.434945	112	178	93	120
C1S	-	0.699471	0.0976111	19190.5	26866	12839	14906
C2	complement component 2 (within H-2S)	0.465913	0.0689718	15287	25760	13494	15366
C2cd2	C2 calcium-dependent domain containing 2	-0.367676	0.366883	271	248	313	351
C2cd2l	C2 calcium-dependent domain containing 2-like	-0.195531	0.512295	434	452	485	515
C2cd3	C2 calcium-dependent domain containing 3	0.0486112	0.924809	242	341	270	280
C2cd4c	C2 calcium-dependent domain containing 4C	-0.905737	0.557057	6	7	11	13
C2cd5	C2 calcium-dependent domain containing 5	0.0865132	0.857963	262	278	243	258
C3	complement component 3	0.833286	0.513093	317	617	247	258
C3ar1	complement component 3a receptor 1	0.420659	0.440553	687	768.5	491	582
C4a	complement component 4A (Rodgers blood group)	1.00224	0.0283043	18335.8	43545.2	14216.5	15381.8
C4b	complement component 4B (Chido blood group)	1.19354	0.00606258	27849.8	68116.6	19173.5	21008
C4BPA	-	2.1198	NA	18	6	0	6
C5ar1	complement component 5a receptor 1	-0.55473	0.000491998	1751	2041	2512	2978
C5ar2	complement component 5a receptor 2	0.736518	0.0304693	186	208	101	133
C6	complement component 6	0.667136	0.241824	1894	4304	1719	2039
C8g	complement component 8, gamma polypeptide	-0.181877	0.85808	48.5	43	51	51
Caap1	caspase activity and apoptosis inhibitor 1	0.195106	0.730769	119.5	184	123	136
Cab39	calcium binding protein 39	-0.180902	0.299999	2107.5	2444.5	2394.5	2683
Cab39l	calcium binding protein 39-like	0.424153	0.0906217	624	747	454	553
Cabin1	calcineurin binding protein 1	-0.0644996	0.874506	666	745	717	732.5
Cables1	CDK5 and Abl enzyme substrate 1	0.0167833	0.986662	181	129	126	183
Cabp1	calcium binding protein 1	0.250731	0.931498	10	4	5	7
Cabp4	calcium binding protein 4	-0.484508	0.785754	12	10	11	20
Cabp7	calcium binding protein 7	-0.497928	0.242246	100.5	124.5	144	167
Cabyr	calcium-binding tyrosine-(Y)-phosphorylation regulated (fibrousheathin 2)	-0.378396	0.843887	7	10	7	15
Cacfd1	calcium channel flower domain containing 1	0.29676	0.50265	159	195	118	167
Cachd1	cache domain containing 1	0.406632	0.371806	124	180	107	117
Cacna1a	calcium channel, voltage-dependent, P/Q type, alpha 1A subunit	0.210628	0.703438	139	143	119	121
Cacna1b	calcium channel, voltage-dependent, N type, alpha 1B subunit	-1.26913	0.523369	4	10	19	13
Cacna1c	calcium channel, voltage-dependent, L type, alpha 1C subunit	0.450702	0.346372	161	189	118	134
Cacna1d	calcium channel, voltage-dependent, L type, alpha 1D subunit	0.925786	0.366	21	37	11	19
Cacna1e	calcium channel, voltage-dependent, R type, alpha 1E subunit	-3.03759	NA	1	2	11	13
Cacna1f	calcium channel, voltage-dependent, alpha 1F subunit	-2.46557	NA	2	3	13	14
Cacna1g	calcium channel, voltage-dependent, T type, alpha 1G subunit	-0.0978328	0.939369	135	107	123	135
Cacna1h	calcium channel, voltage-dependent, T type, alpha 1H subunit	-0.193885	0.912	29.5	18	27	28
Cacna1i	calcium channel, voltage-dependent, alpha 1I subunit	-2.0117	0.110852	9	6	31	29
Cacna1s	calcium channel, voltage-dependent, L type, alpha 1S subunit	0.348735	0.708875	1081	315	532	596
Cacna2d1	calcium channel, voltage-dependent, alpha2/delta subunit 1	0.458852	0.393108	665	466	370	457
Cacna2d2	calcium channel, voltage-dependent, alpha 2/delta subunit 2	0.379605	0.704395	38	44	21	42
Cacna2d3	calcium channel, voltage-dependent, alpha2/delta subunit 3	-0.59506	0.744531	29	6	21.5	33
Cacna2d4	calcium channel, voltage-dependent, alpha 2/delta subunit 4	0.499494	NA	3	9	5	3
Cacnb1	calcium channel, voltage-dependent, beta 1 subunit	-0.266013	0.82118	335	104	268	272
Cacnb2	calcium channel, voltage-dependent, beta 2 subunit	-0.12866	0.962454	11	7	7	13
Cacnb3	calcium channel, voltage-dependent, beta 3 subunit	-0.165794	0.644137	286	354	348	355
Cacnb4	calcium channel, voltage-dependent, beta 4 subunit	2.06833	0.0204648	36	56	14	7
Cacng1	calcium channel, voltage-dependent, gamma subunit 1	0.490979	0.523376	606	228	294	311
Cacng4	calcium channel, voltage-dependent, gamma subunit 4	-2.50047	0.0674826	4	4	26	18
Cacng6	calcium channel, voltage-dependent, gamma subunit 6	0.881273	0.463669	53	24	15	28
Cactin	cactin, spliceosome C complex subunit	0.00874937	0.988732	337	388	336	373
Cacul1	CDK2 associated, cullin domain 1	0.0387354	0.916285	668	847.5	696	749.5
Cacybp	calcyclin binding protein	-0.315037	0.164846	958	1045	1157	1300
Cad	carbamoyl-phosphate synthetase 2, aspartate transcarbamylase, and dihydroorotase	-0.0411576	0.943772	816	1158	923	1063
Cadm1	cell adhesion molecule 1	-0.448292	0.381847	89	98	122	129
Cadm3	cell adhesion molecule 3	1.91533	3e-07	1587	2962	540	628
Cadm4	cell adhesion molecule 4	-0.353766	0.668841	88	176	154	172
Cage1	cancer antigen 1	-0.163625	0.91778	14	34	23	29
Calcoco1	calcium binding and coiled coil domain 1	0.0310619	0.923288	1194	1265	1100	1278
Calcr	calcitonin receptor	-1.24485	NA	5	5	14	9
Calcrl	calcitonin receptor-like	1.04566	0.00148003	635	713	298	346
Cald1	caldesmon 1	0.762477	0.00477	2907	3801	1764	2119
Calhm2	calcium homeostasis modulator family member 2	0.43416	0.0796474	622	658	419	519
Calm1	calmodulin 1	-0.111575	0.621761	13096	17588	14813	17703
Calm2	calmodulin 2	0.318189	0.0543611	5364	6133	4203	4886
Calm3	calmodulin 3	0.341427	0.162241	1284	1534	963	1233
Calml3	calmodulin-like 3	-3.13914	0.144084	354	55	1722	2043
Calml4	calmodulin-like 4	1.99625	2.34e-06	167	266	47	59
Calr	calreticulin	0.105941	0.752674	16020	25325	17198	20240
Calr3	calreticulin 3	0.269647	0.728676	68	72	59	55
Calu	calumenin	0.726389	0.000364995	11876	16195	7512	9130
Camk1	calcium/calmodulin-dependent protein kinase I	-0.14984	0.607418	950.5	1107	1045	1201.5
Camk1d	calcium/calmodulin-dependent protein kinase ID	-0.363766	0.427464	173	261	256	289
Camk2a	calcium/calmodulin-dependent protein kinase II alpha	0.548816	0.578204	150	61	68	79
Camk2b	calcium/calmodulin-dependent protein kinase II, beta	-0.228831	0.782665	359	173	264	373
Camk2d	calcium/calmodulin-dependent protein kinase II, delta	0.529426	0.0764092	695	1072.5	553	641
Camk2g	calcium/calmodulin-dependent protein kinase II gamma	0.510104	0.194479	210.67	233.67	120.83	190
Camk2n1	calcium/calmodulin-dependent protein kinase II inhibitor 1	1.25762	0.0206316	75	137	32	55
Camk2n2	calcium/calmodulin-dependent protein kinase II inhibitor 2	-1.73369	NA	3	3	7	13
Camk4	calcium/calmodulin-dependent protein kinase IV	-0.722493	0.56502	12	20	20	32
Camkk1	calcium/calmodulin-dependent protein kinase kinase 1, alpha	0.624511	0.0251221	545	896	413	498
Camkk2	calcium/calmodulin-dependent protein kinase kinase 2, beta	0.00593855	0.996035	115	109	104	117
Camkmt	calmodulin-lysine N-methyltransferase	0.190146	0.800588	87	143	79	119
CAMLG	-	0.0222117	0.968276	311	339	298	333
Camp	cathelicidin antimicrobial peptide	-0.817244	NA	1	8	7	8
Camsap1	calmodulin regulated spectrin-associated protein 1	-0.0734808	0.86618	500	587	509	619
Camsap2	calmodulin regulated spectrin-associated protein family, member 2	-0.00466786	0.991116	1012	1266	1022	1226
Camsap3	calmodulin regulated spectrin-associated protein family, member 3	-2.52793	0.377923	81	6	234	296
Camta1	calmodulin binding transcription activator 1	-1.20365	0.0606314	80	52	148	156
Camta2	calmodulin binding transcription activator 2	-0.101427	0.744531	748	1015	882.5	967.5
Cand1	cullin associated and neddylation disassociated 1	0.187394	0.386199	1989	2576	1806	2130
Cand2	cullin-associated and neddylation-dissociated 2 (putative)	0.336501	0.68642	477	200	224	327
Cant1	calcium activated nucleotidase 1	0.304314	0.202728	784	965	662	728
Canx	calnexin	0.095893	0.73649	7843	11298	8222	9263
Cap1	CAP, adenylate cyclase-associated protein 1 (yeast)	-0.319615	0.0694642	5384	7345	7142	8424
Cap2	CAP, adenylate cyclase-associated protein, 2 (yeast)	-0.248106	0.82816	149	59	116	136
Capg	capping protein (actin filament), gelsolin-like	-0.537862	0.000572875	4178	5703	6564	7475
Capn1	calpain 1	0.017368	0.95658	1518	1646	1439	1646
Capn10	calpain 10	-0.463074	0.179931	237	258	344	325
Capn12	calpain 12	-2.00807	5.6e-08	210.5	146.5	687	744.5
Capn13	calpain 13	0.845418	0.402728	25	96	30	34
Capn15	calpain 15	-0.611766	0.0774258	195	196	275	316
Capn2	calpain 2	0.112556	0.755013	3980	5706	4153	4589
Capn3	calpain 3	0.394704	0.590375	419	197	213	264
Capn5	calpain 5	0.631817	0.196775	286	666	288	301
Capn6	calpain 6	0.772492	0.61385	1079	268	370	447
Capn7	calpain 7	-0.0265713	0.944723	509	578	508	583
Capn8	calpain 8	-2.6575	0.0744	12	3	51	45
Capns1	calpain, small subunit 1	0.111926	0.55346	3422.83	4090.83	3226.67	3605.83
Capns2	calpain, small subunit 2	-2.42576	0.024066	39	8	119	142
Caprin1	cell cycle associated protein 1	0.204078	0.367978	3878	5418	3662	4233
Capza1	capping protein (actin filament) muscle Z-line, alpha 1	0.0257079	0.949568	2722.5	4087.5	2983	3552
Capza2	capping protein (actin filament) muscle Z-line, alpha 2	0.141711	0.527923	3467	4588	3192	3985
Capzb	capping protein (actin filament) muscle Z-line, beta	0.0670871	0.787792	4528.5	5757	4508	5124
Car11	carbonic anhydrase 11	0.0322056	0.976883	171	91	112	148
Car12	carbonic anhydrase 12	-2.08039	0.038755	8	17	58	43
Car13	carbonic anhydrase 13	-0.183491	0.787211	134	176.5	134	215
Car14	carbonic anhydrase 14	0.724005	0.281615	201	103	81	106
Car2	carbonic anhydrase 2	-1.10678	0.105731	164	240	407	441
Car3	carbonic anhydrase 3	0.81545	0.394241	21762	11132	8611	10373
Car4	carbonic anhydrase 4	-1.05782	0.251896	6	41	48	44
Car5b	carbonic anhydrase 5b, mitochondrial	0.793551	0.000412012	864	1312	533	697
Car6	carbonic anhydrase 6	-1.31912	0.158432	92	24	125	175
Car8	carbonic anhydrase 8	1.33731	0.155415	34	200	41	46
Car9	carbonic anhydrase 9	0.872858	0.585389	21	215	69	49
Card10	caspase recruitment domain family, member 10	0.665331	0.0869578	232	250	132	169
Card6	caspase recruitment domain family, member 6	0.366131	0.23583	566	543	395	458
Card9	caspase recruitment domain family, member 9	-0.381459	0.294066	174	212	256	235
Carf	calcium response factor	0.318994	0.575596	108	134	94	96
Carhsp1	calcium regulated heat stable protein 1	0.419344	0.0687851	1100	1416	831	1019
CARKD	-	-0.326867	0.468531	260	219	284	313
Carm1	coactivator-associated arginine methyltransferase 1	0.0411433	0.903668	936.5	1160.5	956	1041.5
Cars	cysteinyl-tRNA synthetase	-0.473958	0.132099	696	810	955	1105
Cars2	cysteinyl-tRNA synthetase 2 (mitochondrial)(putative)	-0.00254191	0.997676	160	158	164	149
Casc1	cancer susceptibility candidate 1	-0.105343	0.897006	69	90	77	91
Casc3	cancer susceptibility candidate 3	-0.0676359	0.8954	272	354	297	347
Casc4	cancer susceptibility candidate 4	0.445529	0.25542	374	301	238	255
CASC5	-	0.0589113	0.927908	249	440	280	365
Cask	calcium/calmodulin-dependent serine protein kinase (MAGUK family)	0.342021	0.287455	422	505	360	356.5
Caskin1	CASK interacting protein 1	-0.558409	0.510503	40	42	65	53
Caskin2	CASK-interacting protein 2	0.364545	0.49117	395	278	262	259
Casp1	caspase 1	-0.0563698	0.865788	847	1166	943	1108
Casp12	caspase 12	1.16352	1.85e-08	487	641	237	256
Casp14	caspase 14	-4.49558	5.7e-05	2	5	68	86
Casp2	caspase 2	0.149782	0.586406	637	800	594	678
Casp3	caspase 3	0.278371	0.18045	1055	1197	836	996
Casp4	caspase 4, apoptosis-related cysteine peptidase	0.139312	0.716023	390	547	370	465
Casp6	caspase 6	-0.443558	0.0773259	298	346	397	466
Casp7	caspase 7	-0.389003	0.284419	229	384	372	408
Casp8	caspase 8	0.208169	0.671079	203	325	181	268
Casp8ap2	caspase 8 associated protein 2	0.349949	0.149619	472	578	376	434
Casp9	caspase 9	0.254742	0.428903	336	400	290	316
Casq1	calsequestrin 1	0.582134	0.304382	12172	4964	5532	6140
Casq2	calsequestrin 2	-0.925203	0.161058	369	139	432	558
Cass4	Cas scaffolding protein family member 4	0.0398848	0.96251	138	313	188	236
Cast	calpastatin	0.163422	0.606407	2985	3960	2781	3303
Cat	catalase	0.124533	0.747517	1726	2166	1557	1960
Catsper2	cation channel, sperm associated 2	0.211975	0.853351	30	35	28	27
Catsperd	cation channel sperm associated auxiliary subunit delta	0.133376	0.931013	17	31	16	27
Catsperg1	cation channel sperm associated auxiliary subunit gamma 1	0.122046	0.893441	99	133.25	103.5	103.75
Cav1	caveolin 1, caveolae protein	0.496398	0.292049	6770	5432	3921	4728
Cav2	caveolin 2	0.835532	0.000274	1236	1057	581	700
Cav3	caveolin 3	0.0902433	0.932923	488	185	282	367
Cbfa2t2	CBFA2/RUNX1 translocation partner 2	0.333604	0.418894	177	256	149	188
Cbfa2t3	CBFA2/RUNX1 translocation partner 3	0.143904	0.834453	131	107	103	111
Cbfb	core binding factor beta	-0.196621	0.428903	1040	1396	1289	1444
Cblb	Casitas B-lineage lymphoma b	0.0168059	0.97624	417	443	430	404
Cblc	Casitas B-lineage lymphoma c	-1.11606	0.263943	34	18	64	48
Cbll1	Casitas B-lineage lymphoma-like 1	-0.235266	0.523376	298	372	352	424
Cbln1	cerebellin 1 precursor protein	-2.2204	0.365923	6	0	8	22
Cbln2	cerebellin 2 precursor protein	2.47131	0.0806316	12	98	5	14
Cbr1	carbonyl reductase 1	-0.0233257	0.959431	594.99	557.99	547.99	612.99
Cbr3	carbonyl reductase 3	0.263787	0.49887	229	248	191	200
Cbr4	carbonyl reductase 4	0.22424	0.64853	151	224	144	170
Cbs	cystathionine beta-synthase	-2.2849	0.292049	85	46	312	332
Cbwd1	COBW domain containing 1	0.167636	0.817495	86	98	62	101
Cbx2	chromobox 2	-1.31234	0.00563917	69	67	144	192
Cbx3	chromobox 3	0.0900233	0.727465	1981	2393	1866	2177
Cbx5	chromobox 5	0.346474	0.389234	199	260	182	170
Cbx6	chromobox 6	0.706469	0.000962747	626	636	340	427
Cbx7	chromobox 7	-0.0906043	0.911422	109	83	102	101
Cbx8	chromobox 8	0.258303	0.700532	79	96	66	78
Cby1	chibby family member 1, beta catenin antagonist	0.3458	0.512325	136	150	95	128
Cc2d1a	coiled-coil and C2 domain containing 1A	-0.476964	0.124179	402	396	523	575
Cc2d1b	coiled-coil and C2 domain containing 1B	-0.39764	0.0485586	569	636	750	812
Ccar1	cell division cycle and apoptosis regulator 1	0.0499004	0.894871	961.5	1212	988.5	1070
Ccar2	cell cycle activator and apoptosis regulator 2	0.0919217	0.761523	916	1093	859	996
CCBL1	-	-0.137886	0.792011	263	240	279	267
CCBL2	-	-0.152402	0.905075	29	27	26	36
CCDC101	-	-0.14484	0.802176	277	224	292	255
Ccdc102a	coiled-coil domain containing 102A	0.330316	0.317986	333	383	253	309
CCDC104	-	-0.023496	0.953094	523	622	519	628
Ccdc112	coiled-coil domain containing 112	-0.408609	0.611074	74	75	81	116
Ccdc114	coiled-coil domain containing 114	-0.311735	NA	5	5	8	4
Ccdc115	coiled-coil domain containing 115	0.0947046	0.832062	261.5	349	245.5	317
Ccdc117	coiled-coil domain containing 117	-0.00243322	0.996919	256	308	272	282
Ccdc12	coiled-coil domain containing 12	-0.0398281	0.940969	375	374	340	424
Ccdc120	coiled-coil domain containing 120	-0.69451	0.237947	54	64	102	84
Ccdc124	coiled-coil domain containing 124	-0.0910978	0.808804	833	793	827	886
Ccdc125	coiled-coil domain containing 125	-0.22289	0.642317	127	189	164	197
Ccdc126	coiled-coil domain containing 126	0.130477	0.85954	81	99	81	80
Ccdc127	coiled-coil domain containing 127	0.636454	0.0350486	280.5	300	158	212
Ccdc130	coiled-coil domain containing 130	-0.371584	0.371052	143	188	219	198
CCDC132	-	-0.231077	0.3707	793	1059	987	1144
Ccdc134	coiled-coil domain containing 134	-0.253012	0.587	161	168	198	187
Ccdc137	coiled-coil domain containing 137	-0.0692884	0.900533	186	185	172	214
Ccdc146	coiled-coil domain containing 146	0.523067	0.585389	33.5	59	29	34.5
Ccdc150	coiled-coil domain containing 150	-1.50512	0.225859	10	5	18	25
Ccdc152	coiled-coil domain containing 152	0.872432	0.106438	173	185.5	101.5	89.5
Ccdc163	coiled-coil domain containing 163	-0.267354	0.696022	66	72	67	98
Ccdc167	coiled-coil domain containing 167	-0.132766	0.868883	58	80	63	86
Ccdc17	coiled-coil domain containing 17	-0.492605	0.170819	147	146	188	220
Ccdc174	coiled-coil domain containing 174	0.0909161	0.867715	186	251	173	231
Ccdc175	coiled-coil domain containing 175	0.0268697	0.985173	50	48	39	57
CCDC176	-	0.138609	0.894656	45	53	45.5	41
Ccdc181	coiled-coil domain containing 181	0.0535558	0.946559	121	114	92	134
Ccdc183	coiled-coil domain containing 183	1.03588	NA	19	2	3	8
CCDC19	-	-0.23298	0.84068	41	30	41	42
Ccdc22	coiled-coil domain containing 22	-0.27634	0.411169	364	412.5	404.5	526
Ccdc25	coiled-coil domain containing 25	-0.0983406	0.813074	310	401	355	391
Ccdc27	coiled-coil domain containing 27	0.640358	NA	1	14	4	5
Ccdc28a	coiled-coil domain containing 28A	0.118487	0.860026	172	257.5	164	225
Ccdc28b	coiled coil domain containing 28B	0.543082	0.265949	224.5	206	128	166
Ccdc32	coiled-coil domain containing 32	0.0920917	0.790907	405	475	376	437
Ccdc34	coiled-coil domain containing 34	0.405799	0.404905	117	162	90	117
Ccdc39	coiled-coil domain containing 39	-0.25932	0.702	124	96	134	127
Ccdc43	coiled-coil domain containing 43	-0.0968387	0.833346	351	339	347	383
Ccdc47	coiled-coil domain containing 47	0.252029	0.171512	1680	1812	1366	1526
Ccdc50	coiled-coil domain containing 50	0.51078	0.075593	454	705	378	414
Ccdc51	coiled-coil domain containing 51	-0.585937	0.214727	109	93	150	150
CCDC53	-	0.375984	0.190014	1413	1507	990	1239
Ccdc58	coiled-coil domain containing 58	-0.359614	0.235582	223	268.5	271	351
Ccdc59	coiled-coil domain containing 59	-0.0526388	0.930454	148	193	170.5	176
Ccdc61	coiled-coil domain containing 61	-0.0634781	0.929534	108	152	116	151
Ccdc62	coiled-coil domain containing 62	-0.748549	0.0767905	71	88	119	144
CCDC64	-	-1.60219	0.0420013	26	29	74	91
CCDC64B	-	-3.3478	0.15646	126	17	716	805
Ccdc65	coiled-coil domain containing 65	0.626932	0.509	57	61	23	54.5
Ccdc69	coiled-coil domain containing 69	-0.175674	0.848707	72	99	82	108
Ccdc71	coiled-coil domain containing 71	0.137137	0.820991	140	182	144	142
Ccdc77	coiled-coil domain containing 77	0.0973179	0.870983	150	172	150	145
Ccdc8	coiled-coil domain containing 8	0.94694	0.000958542	589	815	316	399
Ccdc80	coiled-coil domain containing 80	2.09475	9.68e-15	48402	94066.5	14855	17407
Ccdc81	coiled-coil domain containing 81	0.425939	0.721206	24	32	18	23
Ccdc82	coiled-coil domain containing 82	0.242193	0.464	286	359	247	289
Ccdc85a	coiled-coil domain containing 85A	1.44531	0.212176	23	17.5	7	8
Ccdc86	coiled-coil domain containing 86	-0.273987	0.519393	274	236	293	319
Ccdc89	coiled-coil domain containing 89	1.89387	NA	4	7	0	3
Ccdc90b	coiled-coil domain containing 90B	-0.162523	0.568094	533	594	584	659
Ccdc91	coiled-coil domain containing 91	0.0989787	0.784726	440	484	395.5	455
Ccdc92	coiled-coil domain containing 92	-0.796104	0.00886447	119	154	212	254
Ccdc93	coiled-coil domain containing 93	0.0034258	0.995177	424	601	468	532
CCDC94	-	-0.220543	0.453299	352	407	405	466
Ccdc97	coiled-coil domain containing 97	-0.109127	0.739851	496	549	551	556
Cchcr1	coiled-coil alpha-helical rod protein 1	-0.72801	0.00886447	240	245	378	415
Cck	cholecystokinin	1.48734	0.0447878	288	95	66	74
Ccl1	chemokine (C-C motif) ligand 1	-1.18795	0.525107	4	3	6	10
Ccl11	chemokine (C-C motif) ligand 11	-0.607364	0.575517	104	46	116	115
Ccl12	chemokine (C-C motif) ligand 12	-0.937062	0.529449	261	86	292	394
Ccl17	chemokine (C-C motif) ligand 17	-0.194707	0.833346	55	108	75	107
Ccl19	chemokine (C-C motif) ligand 19	-1.01262	0.620579	23	9	29	37
Ccl2	chemokine (C-C motif) ligand 2	-1.45309	1.28e-07	1855	1225	3915	4562
Ccl20	chemokine (C-C motif) ligand 20	1.69193	0.364393	31	17	7	8
CCL21	-	-0.519251	0.9048	2783	9	1925	2338
Ccl22	chemokine (C-C motif) ligand 22	0.229251	0.726512	429	1045	544	666
Ccl24	chemokine (C-C motif) ligand 24	1.42745	0.000164626	824	1157	337	383
Ccl27	-	-0.052642	0.981089	19	13	17	16.5
Ccl3	chemokine (C-C motif) ligand 3	-2.37599	2.7e-07	120	299	970	1119
Ccl4	chemokine (C-C motif) ligand 4	-1.31705	0.000203718	66	84	157	212
Ccl5	chemokine (C-C motif) ligand 5	-0.409249	0.422598	156	243	239	278
Ccl6	chemokine (C-C motif) ligand 6	1.17009	0.0321253	1307	3258	862	1090
Ccl7	chemokine (C-C motif) ligand 7	-1.24796	0.000189387	1231	710	2104	2558
Ccl9	chemokine (C-C motif) ligand 9	-0.822663	0.13576	1846	3444	4146	4922
Ccm2	cerebral cavernous malformation 2	0.143982	0.640954	694	826	676	671
Ccna1	cyclin A1	0.136996	0.962063	14	5	5	13
Ccna2	cyclin A2	-0.201234	0.685871	217	387	295	382
Ccnb1	cyclin B1	-0.51343	0.154578	264	437	425	553
Ccnb2	cyclin B2	0.0413347	0.950957	285	476.5	337	382.5
Ccnc	cyclin C	-0.282404	0.288659	456	597	572	686
Ccnd1	cyclin D1	0.102815	0.66926	1593	1707	1414	1620
Ccnd2	cyclin D2	0.390663	0.0306418	916	1047	688	787
Ccnd3	cyclin D3	0.535928	0.00413309	1538	1663	1010	1170
Ccndbp1	cyclin D-type binding-protein 1	-0.120317	0.746439	503	529	517	591
Ccne1	cyclin E1	-0.175381	0.787819	100	160	128	159
Ccne2	cyclin E2	-0.202186	0.673199	195	212	230	230
Ccnf	cyclin F	-0.278555	0.563642	157	234	233	228
Ccng1	cyclin G1	0.158308	0.627206	5690	5155	4451	5212
Ccng2	cyclin G2	0.272875	0.250477	611	740	486	617
Ccnh	cyclin H	0.18611	0.484276	527	590	442	527
Ccni	cyclin I	0.126116	0.658514	1952	2205	1756	1997
Ccnj	cyclin J	-0.0537858	0.935167	187	163	160	202
Ccnjl	cyclin J-like	0.162009	0.936416	26	13	18	17
Ccnk	cyclin K	-0.26772	0.468963	227	309	304	327
Ccnl1	cyclin L1	-0.394702	0.21401	1119.17	960.5	1254.67	1466.83
Ccnl2	cyclin L2	0.193408	0.660425	595	644.5	487.5	583
Ccnt1	cyclin T1	0.18686	0.771952	97.17	107.83	79	99.33
Ccnt2	cyclin T2	-0.128055	0.745293	675	702	681	808
Ccny	cyclin Y	0.371644	0.0666013	823	943	601	747
Ccp110	centriolar coiled coil protein 110	-0.296048	0.473834	208	200	232	264
Ccpg1	cell cycle progression 1	0.566728	0.00603406	1194	1725	854.5	1078
Ccpg1os	cell cycle progression 1, opposite strand	0.105753	0.933666	43	39	40	35
Ccr1	chemokine (C-C motif) receptor 1	0.0532639	0.953094	637	1962	1068	1326
Ccr10	chemokine (C-C motif) receptor 10	-0.141943	NA	4.5	7	4	7.5
Ccr1l1	chemokine (C-C motif) receptor 1-like 1	0.23166	0.939615	8	5	6	5
Ccr3	chemokine (C-C motif) receptor 3	0.938183	0.608753	6	22	6	8
Ccr4	chemokine (C-C motif) receptor 4	0.0503701	NA	5	5	1	9
Ccr5	chemokine (C-C motif) receptor 5	0.537953	0.098894	1068	1618	836	969
Ccr6	chemokine (C-C motif) receptor 6	0.407344	0.858542	18	10	12	9
Ccr7	chemokine (C-C motif) receptor 7	0.190294	0.839372	59	141	77	92
Ccr9	chemokine (C-C motif) receptor 9	0.231679	0.893983	17	15	13	14
Ccrl2	chemokine (C-C motif) receptor-like 2	-0.268126	0.674109	98	191	144	195
Ccs	copper chaperone for superoxide dismutase	-0.0736793	0.839324	443	548	484	540
Ccsap	centriole, cilia and spindle associated protein	0.154885	0.935	17	21	20	13
Ccser1	coiled-coil serine rich 1	-0.839031	0.424303	21	39	50	54
Cct2	chaperonin containing Tcp1, subunit 2 (beta)	-0.0214195	0.947475	2686	3283	2722	3239.5
Cct3	chaperonin containing Tcp1, subunit 3 (gamma)	-0.324233	0.0671372	2939	3279	3530	4153
Cct4	chaperonin containing Tcp1, subunit 4 (delta)	-0.137341	0.558511	3512	4109	3836	4416
Cct5	chaperonin containing Tcp1, subunit 5 (epsilon)	-0.0880096	0.724094	4243	4918	4427	5167
Cct6a	chaperonin containing Tcp1, subunit 6a (zeta)	-0.293785	0.0611	1561	1813	1886	2188
Cct6b	chaperonin containing Tcp1, subunit 6b (zeta)	0.874199	NA	10	6	2	7
Cct7	chaperonin containing Tcp1, subunit 7 (eta)	-0.324107	0.049994	1940	2435	2480	2902
Cct8	chaperonin containing Tcp1, subunit 8 (theta)	-0.194122	0.327766	2626	3207.5	3021	3544.5
Cct8l1	chaperonin containing TCP1, subunit 8 (theta)-like 1	-0.793938	0.715939	4	5	10	5
CCZ1B	-	-0.0152119	0.968276	1020	1258	1013	1255
Cd101	CD101 antigen	-0.0859626	0.946559	30	68	50	50
Cd14	CD14 antigen	-0.245552	0.351382	2505	2290	2594	3057
Cd151	CD151 antigen	0.201294	0.370457	2932	2959	2417	2645
Cd163	CD163 antigen	1.7017	0.0269028	2504.5	3992	884.5	1063
Cd163l1	CD163 molecule-like 1	-0.634404	0.637	21	14	28	26
Cd164	CD164 antigen	0.342263	0.153379	7325	11343	6534	7837
Cd180	CD180 antigen	0.14416	0.826718	590	1447	831	937
Cd19	CD19 antigen	-0.202999	NA	7	8	8	9
Cd1d1	CD1d1 antigen	0.711531	0.0317813	289	500	227	240
Cd2	CD2 antigen	-0.619123	0.21121	91	145	175	177
Cd200	CD200 antigen	0.262172	0.568337	650	1155	634	833
Cd200r1	CD200 receptor 1	0.637974	0.178084	111	191	85.5	103
Cd209a	CD209a antigen	-0.245995	NA	3	2	2	4
Cd209b	CD209b antigen	1.64999	NA	8	1	1	2
Cd209e	CD209e antigen	0.458487	0.857882	7	4	4	4
Cd22	CD22 antigen	0.792673	0.106093	166	367	128	170
Cd226	CD226 antigen	0.989161	0.206404	67	186	57	65
CD24	-	-2.20731	5.85e-05	189	64	581	611
CD244	-	-0.780031	0.0712	75.83	140.58	167.83	194.17
Cd247	CD247 antigen	-0.18667	0.905305	44	69	54	72
Cd248	CD248 antigen, endosialin	1.08047	9.06e-07	8296.87	14018.8	4836.93	5402.92
Cd27	CD27 antigen	-0.946348	0.232001	32	46	76	70
Cd274	CD274 antigen	-0.165461	0.851041	53	68	64	69
Cd276	CD276 antigen	0.36653	0.110102	2691	3656	2212	2613
Cd28	CD28 antigen	0.821331	0.424303	26	59	25	21
Cd2ap	CD2-associated protein	0.299745	0.348526	504	795	461	570
Cd2bp2	CD2 cytoplasmic tail binding protein 2	0.0450999	0.878836	1029	1259	1035	1142
Cd300a	CD300A molecule	-0.77256	0.0043444	455	378	672	743
Cd300e	CD300E molecule	0.229693	0.867362	30	102	52	55
Cd300lb	CD300 molecule like family member B	-0.00313354	0.998165	63	170	90	136
CD300LE	-	-0.259195	0.586398	1927	1700	2011	2306
Cd300lf	CD300 molecule like family member F	0.358371	0.615886	282	717	369	375
Cd302	CD302 antigen	0.722057	0.00561377	1849	2205	1215	1189
Cd320	CD320 antigen	0.35479	0.322521	517	507.5	382	409.5
Cd34	CD34 antigen	1.66292	1.15e-08	3574	6204	1399	1597
Cd36	CD36 molecule	0.772903	0.0289061	5182.32	9472.84	3778.28	4544.45
Cd37	CD37 antigen	0.244566	0.440306	1017	1497	932	1145
Cd38	CD38 antigen	1.23445	0.000229921	597	1183	328	405
Cd3d	CD3 antigen, delta polypeptide	-0.594724	0.607317	46	71	69	105
Cd3e	CD3 antigen, epsilon polypeptide	-0.169476	0.90493	58	180	108	149
Cd3eap	CD3E antigen, epsilon polypeptide associated protein	0.0205428	0.978974	277.5	243	263	244
Cd3g	CD3 antigen, gamma polypeptide	-0.804878	0.328347	63	86	125	129
Cd4	CD4 antigen	0.922389	0.000135773	3680	5268	2112	2507
Cd40	CD40 antigen	-0.0159907	0.989014	60	132	105	80
Cd44	CD44 antigen	-0.684217	0.0458693	5225	5194	7732	8845
Cd46	CD46 antigen, complement regulatory protein	0.466451	0.722417	18.5	26	16.5	15
Cd47	CD47 antigen (Rh-related antigen, integrin-associated signal transducer)	0.32186	0.260078	1106	1702.5	968	1230.5
Cd48	CD48 antigen	0.514987	0.0021271	4152	5303	3007	3488
Cd5	CD5 antigen	-0.396361	0.767422	36	108	85	96
Cd52	CD52 antigen	0.995802	0.189896	37	60	26	21
Cd53	CD53 antigen	-0.362854	0.31526	2470	4648	4041	4831
Cd55	CD55 molecule, decay accelerating factor for complement	0.255327	0.681864	600	1395	714	898
CD59	-	0.146292	0.647415	2434	3062	2222	2661
Cd5l	CD5 antigen-like	0.877256	0.00151638	1726	2530	1029	1237
Cd6	CD6 antigen	-0.610979	0.487628	46	122	115.5	130
Cd63	CD63 antigen	-0.101876	0.755691	14184	20068	16455	19520
Cd68	CD68 antigen	-0.595348	0.030865	4236	7741	8063	9481.83
Cd69	CD69 antigen	-1.62216	0.000104643	72	178	329	414
Cd7	CD7 antigen	-0.372856	0.676931	160	159	210	196
Cd70	CD70 antigen	0.647546	0.627949	14	38	14	18
Cd72	CD72 antigen	1.39036	1.01e-06	283	353	114	123.5
Cd74	CD74 antigen (invariant polypeptide of major histocompatibility complex, class II antigen-associated)	0.846733	0.00272607	44234.5	69792	28015.5	33831
Cd79b	CD79B antigen	1.28518	0.418187	16	13	4	8
Cd80	CD80 antigen	0.676663	0.31625	58	63	32	43
Cd81	CD81 antigen	0.0239244	0.961227	5806	4760	4664	5725
Cd82	CD82 antigen	-0.414347	0.0409798	1898	1838	2304	2629
Cd83	CD83 antigen	0.114912	0.851041	1343	1898	1375	1549
Cd84	CD84 antigen	-0.63999	0.299882	286	984.5	844.5	1042
Cd86	CD86 antigen	0.704142	0.158981	246	613	243	262
Cd8a	CD8 antigen, alpha chain	0.630524	0.137957	394	566	262	347
CD8B	-	0.282974	0.643218	94	114.5	71	98
Cd9	CD9 antigen	-0.16103	0.517774	5350	6152	5802	6880
Cd93	CD93 antigen	0.399477	0.0842287	1828	2716	1529	1839
Cd96	CD96 antigen	0.0236706	0.990619	42	44	36	48
CD99	-	0.0364119	0.944511	1935	2514	2046	2198
Cd99l2	CD99 antigen-like 2	-1.08776	0.302586	71	21	104	95
Cda	cytidine deaminase	-6.56952	0.000313674	0	1	47	46
Cdadc1	cytidine and dCMP deaminase domain containing 1	0.589937	0.0610921	455	385	254	302
Cdc123	cell division cycle 123	0.185755	0.43284	717	838	626	720
Cdc14a	CDC14 cell division cycle 14A	-0.00699906	0.99356	146	190	171	158
Cdc14b	CDC14 cell division cycle 14B	0.330546	0.661283	66	138	72	85
Cdc16	CDC16 cell division cycle 16	0.381178	0.0461663	949	1161	723	872
Cdc20	cell division cycle 20	-0.543369	0.103596	153	228	258	284
Cdc23	CDC23 cell division cycle 23	0.324929	0.135365	764	997.25	620.5	762.5
Cdc25a	cell division cycle 25A	-0.284149	0.569355	197	178	220	232
Cdc25b	cell division cycle 25B	0.492083	0.154097	562	672	402	461
Cdc25c	cell division cycle 25C	-0.117542	0.894982	71	104	91	94
Cdc26	cell division cycle 26	0.176697	0.600305	434	517	369	461
Cdc27	cell division cycle 27	0.317982	0.291367	443	635	369	480
Cdc34	cell division cycle 34	-0.517372	0.0668797	451	407	570	649
Cdc37	cell division cycle 37	-0.245425	0.145545	1844	2035.5	2157.5	2372
Cdc37l1	cell division cycle 37-like 1	0.320189	0.27054	436	457	311	398
Cdc40	cell division cycle 40	0.173404	0.661438	467	586	413	505.5
Cdc42	cell division cycle 42	0.3337	0.0898588	3829	5263	3148	3934
Cdc42bpa	CDC42 binding protein kinase alpha	0.76204	0.000402559	761	947	456	534
Cdc42bpb	CDC42 binding protein kinase beta	0.106521	0.815627	908	1225	913	1026
Cdc42bpg	CDC42 binding protein kinase gamma (DMPK-like)	-1.61784	0.016677	224	86	468	501
Cdc42ep1	CDC42 effector protein (Rho GTPase binding) 1	0.214543	0.607906	454	383	348.5	368
Cdc42ep2	CDC42 effector protein (Rho GTPase binding) 2	1.04827	2.26e-08	792	909.5	375	436
Cdc42ep3	CDC42 effector protein (Rho GTPase binding) 3	0.223473	0.683667	364	301	239	332
Cdc42ep4	CDC42 effector protein (Rho GTPase binding) 4	0.231613	0.344627	1073	1317	900	1105
Cdc42ep5	CDC42 effector protein (Rho GTPase binding) 5	0.763004	0.00801581	239	322	151	173
Cdc42se1	CDC42 small effector 1	-0.235796	0.230799	1578	2102	1935	2318
Cdc42se2	CDC42 small effector 2	0.0674436	0.883654	1449	1862	1443	1657
Cdc45	cell division cycle 45	-0.241976	0.727258	70	122	102	119
Cdc5l	cell division cycle 5-like (S. pombe)	0.00231285	0.996	1251	1416	1270	1347
Cdc6	cell division cycle 6	-0.0847059	0.92999	56	113	85	88.5
Cdc7	cell division cycle 7 (S. cerevisiae)	-0.15506	0.854319	75	105	78	120
Cdc73	cell division cycle 73, Paf1/RNA polymerase II complex component	-0.3097	0.534119	111	125	113	178
Cdca2	cell division cycle associated 2	-0.0479229	0.954154	101	188	134	156
Cdca3	cell division cycle associated 3	-0.18645	0.747978	159.5	313.5	237.5	285
Cdca4	cell division cycle associated 4	-0.319631	0.405	344	334	377	463
Cdca5	cell division cycle associated 5	-0.0219222	0.990181	21	37	21	37
Cdca7	cell division cycle associated 7	-0.549906	0.219564	105	122	169	156
Cdca7l	cell division cycle associated 7 like	-0.499168	0.472454	107	96	132	153
Cdca8	cell division cycle associated 8	-0.627223	0.0761877	138	225	265	280
Cdcp1	CUB domain containing protein 1	-3.18273	8.46e-05	16	13	114	149
Cdh1	cadherin 1	-2.70816	0.0887372	194	46	768	853
Cdh11	cadherin 11	0.797843	0.039642	1552	1278	749	875
Cdh13	cadherin 13	0.620024	0.291221	2712	2242	1501	1712
Cdh15	cadherin 15	-1.05413	0.527717	20	6	34	20
Cdh17	cadherin 17	-2.18003	0.00260125	16	78	204	197
Cdh19	cadherin 19, type 2	0.948093	NA	14	3	5	4
Cdh2	cadherin 2	1.60612	0.139	116	80	27	38
Cdh23	cadherin 23 (otocadherin)	-0.39476	0.657888	32	64	51.5	71
Cdh26	cadherin-like 26	0.653083	0.748427	17	9	5	12
Cdh3	cadherin 3	-1.18687	0.23468	108	161	289	307
Cdh5	cadherin 5	1.32459	5.6e-11	1317	1204	440	563
Cdh6	cadherin 6	-0.704602	0.5793	43	45	64	78
Cdh7	cadherin 7, type 2	1.45231	0.000966517	90	110	32	40
Cdhr1	cadherin-related family member 1	-1.19379	0.599745	87	16	107	139
Cdhr5	cadherin-related family member 5	-1.32014	0.0644451	55	56	128	146
Cdip1	cell death inducing Trp53 target 1	0.110508	0.82816	422	422	372	400
Cdipt	CDP-diacylglycerol--inositol 3-phosphatidyltransferase (phosphatidylinositol synthase)	-0.0470822	0.869332	1148	1359	1150	1404
Cdk1	cyclin-dependent kinase 1	-0.0515814	0.922681	384	641	477	557
Cdk10	cyclin-dependent kinase 10	-0.266708	0.330536	382.5	473	462	549.5
Cdk11b	cyclin-dependent kinase 11B	-0.199262	0.372512	846	1018	1014	1086
Cdk12	cyclin-dependent kinase 12	-0.174617	0.62083	370	504	467	497
Cdk13	cyclin-dependent kinase 13	0.0185751	0.972748	625	888	683.5	776
Cdk14	cyclin-dependent kinase 14	0.577399	0.0479121	708	1197	556	688
Cdk16	cyclin-dependent kinase 16	-0.0408532	0.892507	1568	1634	1519	1736
Cdk17	cyclin-dependent kinase 17	-0.197406	0.574809	276	341	311	386
Cdk18	cyclin-dependent kinase 18	-3.43346	0.000121733	4	6	56	49
Cdk19	cyclin-dependent kinase 19	0.214479	0.415929	691	816	582	698
Cdk2	cyclin-dependent kinase 2	0.13372	0.747517	273	349	256	301
Cdk20	cyclin-dependent kinase 20	0.0268441	0.952172	341	372	325	365
Cdk2ap1	CDK2 (cyclin-dependent kinase 2)-associated protein 1	-0.00475353	0.988851	1328	1556	1314	1536
Cdk2ap2	CDK2-associated protein 2	0.143772	0.716957	585	776	538	673
Cdk4	cyclin-dependent kinase 4	0.0379183	0.908855	2767.5	3017	2648.5	2903.5
Cdk5	cyclin-dependent kinase 5	0.13898	0.668471	441	600	433	493
Cdk5r1	cyclin-dependent kinase 5, regulatory subunit 1 (p35)	-1.78561	0.31625	3	3	5	16
Cdk5rap1	CDK5 regulatory subunit associated protein 1	-0.0718405	0.905	185	213	192	220
Cdk5rap2	CDK5 regulatory subunit associated protein 2	0.199159	0.61682	333.5	521	333	394.5
Cdk5rap3	CDK5 regulatory subunit associated protein 3	0.186557	0.387264	1068	1187	902	1053
Cdk6	cyclin-dependent kinase 6	0.0630835	0.950232	90	107	83	103
Cdk8	cyclin-dependent kinase 8	-0.177936	0.615411	313	370	357	403
Cdk9	cyclin-dependent kinase 9 (CDC2-related kinase)	-0.365599	0.15919	683	650	775	930
Cdkl1	cyclin-dependent kinase-like 1 (CDC2-related kinase)	1.58112	0.0539664	40	41	10	17
Cdkl2	cyclin-dependent kinase-like 2 (CDC2-related kinase)	-0.395874	0.600172	52	48	56	75
Cdkl3	cyclin-dependent kinase-like 3	0.472854	0.589516	62	71	55	38
Cdkn1a	cyclin-dependent kinase inhibitor 1A (P21)	-1.12819	6.04e-07	827	903	1753	1976
Cdkn1b	cyclin-dependent kinase inhibitor 1B	0.113037	0.732032	695	837	678	711
Cdkn1c	cyclin-dependent kinase inhibitor 1C (P57)	1.3219	0.0286133	834	369	214	278
Cdkn2a	cyclin dependent kinase inhibitor 2A	0.500967	0.597775	87	76	57	57
Cdkn2aip	CDKN2A interacting protein	-0.7034	0.0172036	188	208	317	316
Cdkn2aipnl	CDKN2A interacting protein N-terminal like	-0.474065	0.0137968	568	669	781	911
Cdkn2b	cyclin dependent kinase inhibitor 2B	-0.765391	0.317615	208	192	327	346
Cdkn2c	cyclin dependent kinase inhibitor 2C	0.281355	0.550911	194	248	174.5	182.5
Cdkn3	cyclin-dependent kinase inhibitor 3	-0.0949367	0.898166	97	176	148	133
Cdnf	cerebral dopamine neurotrophic factor	0.585397	0.813994	20	5	9	8
Cdo1	cysteine dioxygenase 1, cytosolic	2.13604	0.053285	1068	586	181	199
Cdon	cell adhesion molecule-related/down-regulated by oncogenes	1.55575	0.000119177	1242	2277	530	631
Cdr2	cerebellar degeneration-related 2	0.13654	0.721	468	722	477	581
Cds1	CDP-diacylglycerol synthase 1	-1.62413	0.000177615	47	101	195	248
Cds2	CDP-diacylglycerol synthase (phosphatidate cytidylyltransferase) 2	-0.0635456	0.941	113	158	116	163
Cdt1	chromatin licensing and DNA replication factor 1	-0.676026	0.145224	59	87	108	120
Cdv3	carnitine deficiency-associated gene expressed in ventricle 3	-0.0432936	0.950957	256.5	355.5	267.5	352
Cdx2	caudal type homeobox 2	-0.22541	0.94874	3	4	4	4
Cdyl	chromodomain protein, Y chromosome-like	-0.207737	0.692406	136	155	155	176
Cdyl2	chromodomain protein, Y chromosome-like 2	0.101081	0.905014	77	91	73	81
Ceacam1	carcinoembryonic antigen-related cell adhesion molecule 1	0.455172	0.112283	337.33	422.33	251.67	291.67
Ceacam10	carcinoembryonic antigen-related cell adhesion molecule 10	-0.59727	0.439993	33.67	59.67	67.33	71.33
Ceacam19	carcinoembryonic antigen-related cell adhesion molecule 19	-2.91558	0.120151	12	1	42	61
Cebpa	CCAAT/enhancer binding protein (C/EBP), alpha	-0.712894	0.0182838	488	542	781	883
Cebpb	CCAAT/enhancer binding protein (C/EBP), beta	-0.601211	0.075593	497	489	751	721
Cebpd	CCAAT/enhancer binding protein (C/EBP), delta	0.413938	0.242741	401	513	337	333
Cebpe	CCAAT/enhancer binding protein (C/EBP), epsilon	-0.526926	0.490357	34	68	55	89
Cebpg	CCAAT/enhancer binding protein (C/EBP), gamma	-0.10699	0.792223	420	412	414	473
Cebpz	CCAAT/enhancer binding protein zeta	0.0776912	0.817367	1152	1328	1040	1280
Cecr2	CECR2, histone acetyl-lysine reader	-0.371739	0.853647	31	11	22	34
CECR5	-	-0.101047	0.862943	149	153	150	170
Cel	carboxyl ester lipase	-0.316124	NA	2	6	1	9
Cela1	chymotrypsin-like elastase family, member 1	0.175067	0.909706	54	324	142	173
Cela2a	chymotrypsin-like elastase family, member 2A	-0.000547536	1	11	15	16	9
Celf1	CUGBP, Elav-like family member 1	-0.0892229	0.807485	500.5	605	516	643
Celf2	CUGBP, Elav-like family member 2	0.922622	0.000669	426	688	276.5	295
Celf3	CUGBP, Elav-like family member 3	-1.96031	0.112944	5	4	14	21
Celf4	CUGBP, Elav-like family member 4	-1.15474	NA	8	3	11	14
Celf5	CUGBP, Elav-like family member 5	-0.936649	0.627671	11	5	14	17
Celsr2	cadherin, EGF LAG seven-pass G-type receptor 2	-2.76184	0.15675	148	42	657	665
Celsr3	cadherin, EGF LAG seven-pass G-type receptor 3	-2.30442	0.0312	4	8	25	33
Cend1	cell cycle exit and neuronal differentiation 1	0.447049	0.833346	9	12	8	7
Cenpa	centromere protein A	-0.59332	0.261755	61.5	100	113.5	124
CENPC	-	0.160576	0.700354	311	444	320	339
Cenpf	centromere protein F	-0.369291	0.276448	251	399	392	425
Cenpi	centromere protein I	-0.104787	0.921083	49	140	96	98
Cenpj	centromere protein J	-0.0704893	0.911532	229	399	303	337
Cenpk	centromere protein K	0.0317961	0.976589	54.5	99.5	78.5	67
Cenpl	centromere protein L	-0.118597	0.854303	145	185	147	207
Cenpm	centromere protein M	-0.224709	0.770865	71	110	77	132
Cenpn	centromere protein N	-0.97069	0.00397117	86	123	187	214
Cenpq	centromere protein Q	-0.408868	0.602656	36	56	50	70
Cenpt	centromere protein T	-0.657799	0.203111	60	91.5	96	139.5
Cenpu	centromere protein U	-0.427361	0.414794	70	109	110	125
Cenpw	centromere protein W	-0.445029	0.454839	78	82	101	114
Cep104	centrosomal protein 104	0.00695166	0.990996	328	402	326	389
Cep112	centrosomal protein 112	0.715824	0.283656	58	74	36	43
Cep120	centrosomal protein 120	0.0282051	0.942274	503	571	497	539
Cep131	centrosomal protein 131	-0.359401	0.328537	181.5	202	247	235.5
Cep162	centrosomal protein 162	0.0234371	0.975212	131	172	132	161
Cep19	centrosomal protein 19	0.0180713	0.976208	325	368	281	398
Cep290	centrosomal protein 290	-0.114129	0.795146	232.5	263.5	238.5	291.5
Cep295	centrosomal protein 295	-0.256231	0.504213	223	306.25	258.25	365.25
Cep295nl	-	-1.26923	0.231729	10	13	21	34
Cep41	centrosomal protein 41	0.425588	0.472454	103	92	68	76
Cep44	centrosomal protein 44	0.136286	0.829653	134	164	144	120
Cep55	centrosomal protein 55	-0.155944	0.815649	99	191	155	157
Cep57	centrosomal protein 57	-0.257315	0.544441	193	189	225	225
Cep57l1	centrosomal protein 57-like 1	0.276509	0.546376	136	179	120	135
Cep63	centrosomal protein 63	-0.00971384	0.986662	227	310.5	251.5	277
Cep70	centrosomal protein 70	-1.14521	0.0636634	24	42	68	74
Cep76	centrosomal protein 76	-0.348158	0.46911	102	166	167	164
Cep78	centrosomal protein 78	-0.35009	0.510503	88	106	123	119
Cep83	centrosomal protein 83	0.299175	0.229	505.5	657.5	417.5	511.5
Cep85	centrosomal protein 85	0.194947	0.614675	521	507	397	495
Cep85l	centrosomal protein 85-like	0.765664	0.163026	217	146	108	105
Cep89	centrosomal protein 89	-0.210183	0.559962	237	276	259	327
Cep95	centrosomal protein 95	-0.258389	0.535194	231.5	238	241.5	315.5
Cep97	centrosomal protein 97	-0.300717	0.616343	81	90	102	105
Cept1	choline/ethanolaminephosphotransferase 1	0.214351	0.340453	1089	1300	955	1069
Cercam	cerebral endothelial cell adhesion molecule	1.05228	0.000360691	2697.5	4013	1514	1637
Cerk	ceramide kinase	-0.0611047	0.884446	1251	1937	1541	1696
Cers1	ceramide synthase 1	-0.0294463	0.981912	50.5	36.5	37.5	50
Cers2	ceramide synthase 2	-0.0481526	0.867	1798	2294.5	1922	2232.5
Cers3	ceramide synthase 3	-3.69477	0.00487918	12	3	91	108
Cers4	ceramide synthase 4	-0.221954	0.766755	108	119	137	122
Cers5	ceramide synthase 5	0.148688	0.593589	1108	1574	1100	1266
Ces1a	carboxylesterase 1A	-1.4093	0.0113329	30	41	78	108
Ces1c	carboxylesterase 1C	-1.96177	0.304262	1	5	6	17
Ces1d	carboxylesterase 1D	0.972826	0.622854	467.83	337.67	188.5	224.33
Ces1e	carboxylesterase 1E	0.0566288	0.979409	48.33	34.67	36	44.33
Ces1f	carboxylesterase 1F	1.38723	0.405976	19	13	8	4.5
Ces2c	carboxylesterase 2C	-3.2619	NA	0	1.5	10.17	8
Ces2g	carboxylesterase 2G	-0.0545703	0.986756	20	14	19	16
Ces2h	carboxylesterase 2H	0.159837	NA	0	5	3	1
CESL1	-	1.38723	0.405976	19	13	8	4.5
Cetn3	centrin 3	-0.0207291	0.968276	421	500	452	464
Cetn4	centrin 4	0.618521	0.552377	35	31	17	26
Cfap126	cilia and flagella associated protein 126	-0.724624	0.687219	12	7	11	21
Cfap20	cilia and flagella associated protein 20	0.11271	0.721833	477	560	440	504
Cfap52	cilia and flagella associated protein 52	0.690907	NA	8	8	3	7
Cfap97	cilia and flagella associated protein 97	0.390118	0.406	150	171	107	135
Cfb	complement factor B	1.29103	9.93e-07	1762	3194	939	1020
Cfd	complement factor D (adipsin)	1.15629	0.015953	6589	5782	2571	2951
Cfdp1	craniofacial development protein 1	0.197594	0.466872	935	1147.67	811	977
Cfh	complement component factor h	0.679755	0.000577601	6399	7565	4101	4459.5
Cfi	complement component factor i	0.0141912	0.992897	26	25	23	27
Cfl1	cofilin 1, non-muscle	0.0974674	0.670354	14104	18383	13483	16348
Cfl2	cofilin 2, muscle	0.380052	0.286458	1907	1407	1184	1365
Cflar	CASP8 and FADD-like apoptosis regulator	0.460544	0.0696983	361	433	253	316
Cfp	complement factor properdin	0.807932	0.0639469	1640	3234	1259	1430
Cggbp1	CGG triplet repeat binding protein 1	-0.0130005	0.970195	1151	1351	1129	1360
Cgnl1	cingulin-like 1	1.04938	4.57e-05	482	456	212	237
Cgref1	cell growth regulator with EF hand domain 1	1.70269	1.63e-10	1884	3535	740	873
Cgrrf1	cell growth regulator with ring finger domain 1	0.376476	0.239197	575	578	387	495
Ch25h	cholesterol 25-hydroxylase	-0.270474	0.674508	59	84	86	82
Chac1	ChaC, cation transport regulator 1	-3.35276	0.00207858	235	53	1470	1569
Chac2	ChaC, cation transport regulator 2	0.354899	0.619557	82	75	63	58
Chad	chondroadherin	0.17216	0.941032	13	9	5	15
Chaf1b	chromatin assembly factor 1, subunit B (p60)	-0.234201	0.723481	66	91	84	97
Champ1	chromosome alignment maintaining phosphoprotein 1	0.192807	0.471	532	615	470	517
Chchd1	coiled-coil-helix-coiled-coil-helix domain containing 1	-0.156323	0.683734	756	736	728	925
Chchd10	coiled-coil-helix-coiled-coil-helix domain containing 10	-0.896716	0.231009	207	74	223	316
Chchd2	coiled-coil-helix-coiled-coil-helix domain containing 2	-0.471706	0.0450411	1348.66	1399.99	1745.32	2025.32
Chchd3	coiled-coil-helix-coiled-coil-helix domain containing 3	-0.177983	0.519027	1344	1399	1416	1653
Chchd4	coiled-coil-helix-coiled-coil-helix domain containing 4	-0.443614	0.362598	161	182	198	264
Chchd5	coiled-coil-helix-coiled-coil-helix domain containing 5	0.133136	0.830304	165	200	162.5	164.5
Chchd6	coiled-coil-helix-coiled-coil-helix domain containing 6	-1.32777	6.35e-08	269	294	630	767
Chd1	chromodomain helicase DNA binding protein 1	-0.0646878	0.85865	578	804	672	741
Chd2	chromodomain helicase DNA binding protein 2	0.234136	0.603213	506	783	473	599
Chd6	chromodomain helicase DNA binding protein 6	0.323772	0.0993798	822	968	645	764
Chd8	chromodomain helicase DNA binding protein 8	0.170776	0.523861	1130	1319	1003	1138
Chdh	choline dehydrogenase	-2.84463	0.0539673	4	2	21	22
Chek1	checkpoint kinase 1	-0.210389	0.762396	92	112	86	149
Chek2	checkpoint kinase 2	-0.245031	0.673973	102	136	118	160
Cherp	calcium homeostasis endoplasmic reticulum protein	-0.47513	0.0363872	573.5	604	743	875.5
Chfr	checkpoint with forkhead and ring finger domains	-0.351103	0.129661	556	630	728	758
CHI3L1	-	-0.867297	0.0735992	96	109	168	201
Chic2	cysteine-rich hydrophobic domain 2	-0.0665987	0.901328	209	285	220	289
Chid1	chitinase domain containing 1	0.180661	0.523891	856	1011	734	890
Chit1	chitinase 1 (chitotriosidase)	0.164634	0.947244	13	7	8	10
Chka	choline kinase alpha	-0.93129	0.00601532	105	136	211	240
Chkb	choline kinase beta	-0.434532	0.121943	418	392	508	577
Chm	choroidermia (RAB escort protein 1)	0.490246	0.104071	332	455	261	287
Chml	choroideremia-like	0.13675	0.900027	40	43	39	35
Chmp1a	charged multivesicular body protein 1A	-0.0115266	0.972748	1430	1666	1407	1669
Chmp1b	charged multivesicular body protein 1B	-0.244537	0.24798	970	1015	1051	1277
Chmp2a	charged multivesicular body protein 2A	-0.0980222	0.686925	1943	2279	2050	2401
Chmp3	charged multivesicular body protein 3	0.260501	0.141986	1846	2075	1479	1751
CHMP4BL1	-	-0.222811	0.255811	1266	1580	1549	1709
Chmp4c	charged multivesicular body protein 4C	-1.82312	0.0875298	53	13	102	140
Chmp5	charged multivesicular body protein 5	-0.106385	0.730769	1095	1241	1101	1385
Chmp6	charged multivesicular body protein 6	-0.136491	0.626008	630	653	669	722
Chmp7	charged multivesicular body protein 7	-0.234463	0.279275	660	805	785	910
Chn1	chimerin 1	0.488962	0.442654	119	86	68	78
Chn2	chimerin 2	0.619253	0.376507	98	167	98	67
Chodl	chondrolectin	1.19189	0.543139	27	8	5	11
Chordc1	cysteine and histidine-rich domain (CHORD)-containing, zinc-binding protein 1	-0.290768	0.371481	587	684	745	781
Chp1	calcineurin-like EF hand protein 1	0.0715878	0.817878	1853	2401	1872	2095
Chp2	calcineurin-like EF hand protein 2	0.914224	0.00365005	582	466	263	291
Chpf	chondroitin polymerizing factor	0.0215595	0.945354	1632	1747	1530	1757
Chpf2	chondroitin polymerizing factor 2	0.253097	0.400685	685.5	901	620.5	683.5
Chpt1	choline phosphotransferase 1	0.532692	0.0786309	296.25	419.75	235	248.5
Chrac1	chromatin accessibility complex 1	-0.123328	0.777946	542	504	501	633
Chrd	chordin	0.855408	0.00667879	246	347	147	174
Chrdl1	chordin-like 1	2.60364	2.93e-11	1204	1638	225	231
Chrdl2	chordin-like 2	0.186683	0.93568	36	27	28	27
Chrm4	cholinergic receptor, muscarinic 4	-0.403713	NA	2	8	3	10
Chrna1	cholinergic receptor, nicotinic, alpha polypeptide 1 (muscle)	-1.79221	0.000293239	69.83	48.83	212.17	196.58
Chrnb1	cholinergic receptor, nicotinic, beta polypeptide 1 (muscle)	-0.38144	0.759634	87	34	79	81
Chrnb2	cholinergic receptor, nicotinic, beta polypeptide 2 (neuronal)	-1.63913	NA	3	4	13	8
Chrnd	cholinergic receptor, nicotinic, delta polypeptide	-2.79858	0.0319288	34	2	125	137
Chrne	cholinergic receptor, nicotinic, epsilon polypeptide	-1.07593	0.265909	53	17	62.5	90.5
Chrng	cholinergic receptor, nicotinic, gamma polypeptide	-4.4613	0.000572875	8	2	107.5	116
Chst1	carbohydrate sulfotransferase 1	0.299363	0.465817	155	187	139	133
Chst10	carbohydrate sulfotransferase 10	0.697919	0.383903	87	71	30	69
Chst11	carbohydrate sulfotransferase 11	0.355972	0.571814	86	118	74	82
Chst12	carbohydrate sulfotransferase 12	-0.435077	0.155751	606	959	955	1107
Chst13	carbohydrate sulfotransferase 13	-1.13959	0.313683	14	8	27	21
Chst14	carbohydrate sulfotransferase 14	0.3659	0.300418	260	341	201	258
Chst15	carbohydrate sulfotransferase 15	-0.0737244	0.921272	85	119	100	110
Chst3	carbohydrate sulfotransferase 3	2.48958	NA	13	10	3	1
Chst5	carbohydrate (N-acetylglucosamine 6-O) sulfotransferase 5	-2.45332	NA	0	2	7	3
Chst7	carbohydrate (N-acetylglucosamino) sulfotransferase 7	0.562385	0.573148	41	41	25	30
Chsy1	chondroitin sulfate synthase 1	-0.104363	0.824089	588	569	597	632
Chtf18	CTF18, chromosome transmission fidelity factor 18	-0.307517	0.608162	67	78.5	88.5	88
Chtf8	CTF8, chromosome transmission fidelity factor 8	-0.205795	0.379018	1205	1517	1446	1635
Chuk	conserved helix-loop-helix ubiquitous kinase	-0.0372164	0.932923	487	606	469	639
Churc1	churchill domain containing 1	-0.13178	0.735785	597	619	571	752
Ciao1	cytosolic iron-sulfur protein assembly 1	-0.0136754	0.979076	350	434	375	401
Ciapin1	cytokine induced apoptosis inhibitor 1	-0.773118	1.04e-05	471	518	769	899
Ciart	circadian associated repressor of transcription	0.917697	0.0249444	180	151	84	90
Cib1	calcium and integrin binding 1 (calmyrin)	-0.286829	0.288118	932	992	1107	1207
Cib2	calcium and integrin binding family member 2	-0.751278	0.42345	92	54	112	136
Cidea	cell death-inducing DNA fragmentation factor, alpha subunit-like effector A	-0.922839	0.115359	39	59	89	92
Cideb	cell death-inducing DNA fragmentation factor, alpha subunit-like effector B	0.778517	NA	8	6	5	3
Cidec	cell death-inducing DFFA-like effector c	1.78621	0.0198679	461	212	95	103
Ciita	class II transactivator	0.908549	0.000451207	483	731	280	353
Cilp	cartilage intermediate layer protein, nucleotide pyrophosphohydrolase	0.731333	0.367834	940	331	382	400
Cilp2	cartilage intermediate layer protein 2	0.120713	NA	9	6	5	9
Cinp	cyclin-dependent kinase 2 interacting protein	-0.207745	0.506047	358	459	418	510
Cipc	CLOCK interacting protein, circadian	0.134083	0.678179	579	585	475	576
Cir1	corepressor interacting with RBPJ, 1	0.116983	0.737534	391	454	336	434
Cirbp	cold inducible RNA binding protein	0.0274918	0.968276	435	367	353	432
CIRH1A	-	-0.224578	0.492094	603	565	585	775
Cisd1	CDGSH iron sulfur domain 1	-0.325552	0.156545	770	837	941	1044
Cisd2	CDGSH iron sulfur domain 2	0.0498761	0.896608	772	983	755	912
Cisd3	CDGSH iron sulfur domain 3	0.409745	0.360436	311	315	211	256
Cish	cytokine inducible SH2-containing protein	0.0528558	0.952689	136	131	126	128
Cit	citron	0.0448079	0.970195	108	204	150	141
Cited1	Cbp/p300-interacting transactivator with Glu/Asp-rich carboxy-terminal domain 1	1.54892	NA	15	8	3	5
Cited2	Cbp/p300-interacting transactivator, with Glu/Asp-rich carboxy-terminal domain, 2	-0.405951	0.252687	515	913	869	965
Cited4	Cbp/p300-interacting transactivator, with Glu/Asp-rich carboxy-terminal domain, 4	-1.98338	0.0743573	54	17	119	171
Ciz1	CDKN1A interacting zinc finger protein 1	-0.212948	0.393773	510	582	558	692
Ckap2	cytoskeleton associated protein 2	0.102562	0.848707	205	296	215	241
Ckap4	cytoskeleton-associated protein 4	0.455184	0.229577	1786	2525	1471	1597
Ckb	creatine kinase, brain	-0.940034	0.0003297	2785.5	5183	6814	8001
Cklf	chemokine-like factor	-0.100098	0.881261	97	156	119	146
Ckm	creatine kinase, muscle	0.247543	0.861547	30914	8412	16056	18113
CKMT1B	-	-3.38641	0.0098713	24	1	133	140
Ckmt2	creatine kinase, mitochondrial 2	0.533076	0.519647	707	281	339	356
Cks1b	CDC28 protein kinase 1b	0.202622	0.520645	530	547.5	423	504.5
[truncated: 11,008 more rows]

## Sheet: Control vs Metaseal
Dataset 1-3: Global gene expression changes of Metaseal group, as compared to those of control group.
Gene symbol	Gene name	log2 FC	FDR	Control_1 count	Control_2 count	Metaseal_1 count	Metaseal_2 count
2021-03-01	-	0.659499	0.504355	113	215	43	182
2021-03-01	-	-0.198458	0.825665	113	215	43	182
2021-03-02	-	0.396035	0.229811	655	685	382	697
2021-03-02	-	0.318554	0.135963	655	685	382	697
2021-03-03	-	0.189529	0.736416	257	355	203	359
2021-03-05	-	-0.0306336	0.958174	527	560	533	611
2021-03-06	-	0.0688629	0.866203	1098	1242	961	1362
2021-03-07	-	-0.0533335	0.908115	528	646	569	684
2021-03-08	-	-0.122252	0.745486	1402	2101	1757	2137
2021-03-09	-	0.687992	0.449874	37	42	21	30
2021-03-10	-	-0.235733	NA	2	6	2	8
2021-09-01	-	-0.530102	0.429787	131	139	114	308.5
2021-09-02	-	0.319419	0.0507358	9360.5	12278	7649	10251.5
2021-09-03	-	1.24914	0.629703	12	7	1	8
2021-09-04	-	0.768308	0.0730352	339	290	131	265
2021-09-05	-	-0.392142	0.557589	283.5	386	533.5	330
2021-09-06	-	-0.320982	0.374105	364	587	526	691
2021-09-07	-	0.222433	0.263524	3587	4525	3188	3966
2021-09-08	-	0.327705	0.208269	2300	3445	1913	2819
2021-09-09	-	-0.578098	7.83e-06	2434	2636	3365	4501
2021-09-10	-	0.300993	0.533662	263	381	268	260
2021-09-11	-	-0.191901	0.716476	544	698	772	652
2021-09-15	-	0.0689299	0.788481	5091	6037	4887	6049
A2m	alpha-2-macroglobulin	0.721133	0.0247341	1150	1761	658	1189
A3galt2	alpha 1,3-galactosyltransferase 2 (isoglobotriaosylceramide synthase)	-0.431315	0.0704986	1133	1203	1591	1630
AA926063	-	-1.02189	0.35301	28	54	30	152
Aaas	achalasia, adrenocortical insufficiency, alacrimia	-0.544958	0.0529786	222	265	334	397
Aacs	acetoacetyl-CoA synthetase	-0.046791	0.938472	302	362	321	385
Aaed1	-	0.300089	0.763433	63	85	49	76
Aagab	alpha- and gamma-adaptin binding protein	0.274761	0.553617	221	325	204	259
Aak1	AP2 associated kinase 1	-0.131593	0.837567	239	361	328	337
Aamdc	adipogenesis associated Mth938 domain containing	0.8109	0.126119	162	115	64	104
Aamp	angio-associated migratory protein	-0.0107347	0.98386	1575.5	1807	1553.5	1969
Aar2	AAR2 splicing factor homolog	0.0623319	0.931958	300	278	228	355
Aard	alanine and arginine rich domain containing protein	1.73107	0.26421	13	96	23	7
Aars	alanyl-tRNA synthetase	-0.540999	0.00220265	1305	1763	1955	2653
Aars2	alanyl-tRNA synthetase 2, mitochondrial	-0.119397	0.872299	131	143	149	156
Aarsd1	alanyl-tRNA synthetase domain containing 1	-0.0555551	0.953967	318	532	301	628
Aasdhppt	aminoadipate-semialdehyde dehydrogenase-phosphopantetheinyl transferase	-0.115863	0.760351	467	590	484	706
Aass	aminoadipate-semialdehyde synthase	-0.378826	0.901091	36	6	42	13
Aatf	apoptosis antagonizing transcription factor	0.00212425	0.998434	255	328	267	332
Aatk	apoptosis-associated tyrosine kinase	0.484655	0.756706	54	18	21	35
Abca1	ATP-binding cassette, sub-family A (ABC1), member 1	-0.37193	0.287845	2467	1949	2890	3022
Abca13	ATP-binding cassette, sub-family A (ABC1), member 13	0.220453	0.946878	5	21	11	11
Abca17	ATP-binding cassette, sub-family A (ABC1), member 17	-0.22926	0.872299	48	43	34	81
Abca2	ATP-binding cassette, sub-family A (ABC1), member 2	-0.301034	0.339582	907	912	884	1484
Abca4	ATP-binding cassette, sub-family A (ABC1), member 4	-0.687211	0.482565	147	530	698	322
Abca5	ATP-binding cassette, sub-family A (ABC1), member 5	0.823783	0.0940142	139	282	104	138
Abca7	ATP-binding cassette, sub-family A (ABC1), member 7	-0.517043	0.125224	245	324	395	436
Abca8a	ATP-binding cassette, sub-family A (ABC1), member 8a	1.116	0.526897	1219	317	145	682
Abcb10	ATP-binding cassette, sub-family B (MDR/TAP), member 10	-0.263241	0.542342	227	294	284	360
Abcb11	ATP-binding cassette, sub-family B (MDR/TAP), member 11	1.52581	NA	7	10	3	3
Abcb1a	ATP-binding cassette, sub-family B (MDR/TAP), member 1A	-0.971034	0.297417	27.17	27.5	37.33	78.17
Abcb1b	ATP-binding cassette, sub-family B (MDR/TAP), member 1B	-0.781901	0.0224515	279.17	258.5	343.33	641.17
Abcb4	ATP-binding cassette, sub-family B (MDR/TAP), member 4	-0.730513	0.037581	221.67	410	433.33	644.67
Abcb6	ATP-binding cassette, sub-family B (MDR/TAP), member 6	0.0975421	0.85219	376	394	357	382
Abcb7	ATP-binding cassette, sub-family B (MDR/TAP), member 7	0.291617	0.530753	218	325	195.5	260
Abcb8	ATP-binding cassette, sub-family B (MDR/TAP), member 8	-0.317799	0.357528	292	379	377	485
Abcb9	ATP-binding cassette, sub-family B (MDR/TAP), member 9	1.54801	0.0848629	27	37	13	9
Abcc1	ATP-binding cassette, sub-family C (CFTR/MRP), member 1	-0.432414	0.118871	868.5	986.5	1293.42	1249.75
Abcc10	ATP-binding cassette, sub-family C (CFTR/MRP), member 10	-0.177581	0.826823	126.5	120	121	170
Abcc3	ATP-binding cassette, sub-family C (CFTR/MRP), member 3	-0.25197	0.649824	271	335	390	337
Abcc4	ATP-binding cassette, sub-family C (CFTR/MRP), member 4	-0.375399	0.312929	207	224	279	294
Abcc5	ATP-binding cassette, sub-family C (CFTR/MRP), member 5	-0.536658	0.0982344	1190.5	1178.5	1888	1588.5
Abcc8	ATP-binding cassette, sub-family C (CFTR/MRP), member 8	0.295249	NA	8	6	5	7
Abcc9	ATP-binding cassette, sub-family C (CFTR/MRP), member 9	1.36391	1.18e-05	1896	2163	492	1205
Abcd1	ATP-binding cassette, sub-family D (ALD), member 1	0.116587	0.795339	540	787.5	569	682.75
Abcd2	ATP-binding cassette, sub-family D (ALD), member 2	0.858296	0.401153	160	89	30	125
Abcd3	ATP-binding cassette, sub-family D (ALD), member 3	0.404872	0.0535198	706	762	489	664
Abcd4	ATP-binding cassette, sub-family D (ALD), member 4	-0.31765	0.562818	108	127	140	161
Abce1	ATP-binding cassette, sub-family E (OABP), member 1	0.154008	0.496229	1485	1779	1310	1725
Abcf1	ATP-binding cassette, sub-family F (GCN20), member 1	-0.197388	0.475105	1121.5	1104	1206	1435.5
Abcf2	ATP-binding cassette, sub-family F (GCN20), member 2	0.124857	0.774121	1097.5	964	881	1089
Abcf3	ATP-binding cassette, sub-family F (GCN20), member 3	-0.0442591	0.922098	823	872	738	1090
Abcg1	ATP binding cassette subfamily G member 1	-0.747873	0.0282393	1604	1248	2643.17	2248
Abcg2	ATP binding cassette subfamily G member 2 (Junior blood group)	0.340988	0.751042	77	44	44	57
Abcg3	ATP binding cassette subfamily G member 3	0.0192688	0.979238	238.67	336.58	249	336.58
ABCG3L1	-	0.0666477	0.953931	85.78	103.11	67.33	123.33
ABCG3L2	-	-0.103026	0.841581	232.94	308.9	253.09	349.17
ABCG3L3	-	0.221528	0.643506	364	494.92	375.67	369.58
ABCG3L4	-	-0.101482	0.843966	235.28	305.44	249.83	349.83
Abcg4	ATP binding cassette subfamily G member 4	0.464229	0.717748	31	31	19	28
Abhd1	abhydrolase domain containing 1	0.367891	0.52256	130.5	125	88.5	118
Abhd10	abhydrolase domain containing 10	-0.321769	0.68203	89	77	77	144
Abhd11	abhydrolase domain containing 11	-0.0936958	0.900418	155	142	149	180
Abhd12	abhydrolase domain containing 12	0.43674	0.0306791	1581	2204	1227	1655
Abhd13	abhydrolase domain containing 13	-0.317626	0.248185	403	411	447	610
Abhd14a	abhydrolase domain containing 14A	0.620746	0.230331	146	157	70	139
Abhd14b	abhydrolase domain containing 14b	0.587232	0.108508	399	458	199	407
Abhd15	abhydrolase domain containing 15	0.215777	0.891404	29	31	17	38
Abhd16a	abhydrolase domain containing 16A	-0.285109	0.283725	601	662	721	867
Abhd17a	abhydrolase domain containing 17A	-0.285911	0.266387	672	692	765	959
Abhd17b	abhydrolase domain containing 17B	-0.158529	0.725966	253	282	268	351
Abhd17c	abhydrolase domain containing 17C	-0.186512	0.782457	104	143	136	151
Abhd2	abhydrolase domain containing 2	-0.306352	0.5767	376	619	668	555
Abhd3	abhydrolase domain containing 3	0.828153	0.512342	28	40	10	31
Abhd4	abhydrolase domain containing 4	-0.183974	0.492414	1799	2253	1890	2912
Abhd5	abhydrolase domain containing 5	-0.0724438	0.882813	431	520	467	562
Abhd6	abhydrolase domain containing 6	-0.0150303	0.986796	338	491	307	572
Abhd8	abhydrolase domain containing 8	0.412498	0.284241	262	270	161	259
Abi1	abl-interactor 1	-0.485849	0.0577133	1033	1378	1707	1713
Abi2	abl-interactor 2	0.0264696	0.9665	513	651	514.5	665
Abi3	ABI gene family, member 3	-1.16945	0.000306343	182.5	131.5	342.5	394
Abl1	c-abl oncogene 1, non-receptor tyrosine kinase	0.0304796	0.941465	2363.5	2922.5	2441.5	2868
Abl2	v-abl Abelson murine leukemia viral oncogene 2 (arg, Abelson-related gene)	-0.825354	0.208269	97	77	187	123
Ablim2	actin-binding LIM protein 2	0.882737	0.567449	107	30	58	16
Ablim3	actin binding LIM protein family, member 3	0.498038	0.405115	179	163	124	125
Abo	ABO blood group (transferase A, alpha 1-3-N-acetylgalactosaminyltransferase, transferase B, alpha 1-3-galactosyltransferase)	-0.0496225	0.976462	31.5	52	35	55.33
Abr	active BCR-related gene	-0.711696	0.000421116	1214	1733.5	2341	2565
Abra	actin-binding Rho activating protein	2.11868	0.00150966	241	90	27	57
Abracl	ABRA C-terminal like	-0.139078	0.728584	1454	2066	1537	2503
Abt1	activator of basal transcription 1	-0.14101	0.813383	243	210	222	301
Abtb1	ankyrin repeat and BTB (POZ) domain containing 1	-0.0759049	0.920111	303	292	236	430
Abtb2	ankyrin repeat and BTB (POZ) domain containing 2	-0.564291	0.374899	127	97	189	148
AC1576	-	-0.350771	0.737073	36	32.22	40.78	49
Acaa1a	acetyl-Coenzyme A acyltransferase 1A	-0.251387	0.356027	540.5	625.5	663.5	762
Acaa1b	acetyl-Coenzyme A acyltransferase 1B	-0.421717	0.857353	7.5	12.5	10.5	18
Acaa2	acetyl-Coenzyme A acyltransferase 2 (mitochondrial 3-oxoacyl-Coenzyme A thiolase)	0.256697	0.593632	1249	923	930	953
Acaca	acetyl-Coenzyme A carboxylase alpha	0.119565	0.77518	507	575.5	458.5	572
Acacb	acetyl-Coenzyme A carboxylase beta	0.501997	0.565435	158	76	80	95
Acad10	acyl-Coenzyme A dehydrogenase family, member 10	0.277443	0.673236	118.5	108.5	85.5	108
Acad11	acyl-Coenzyme A dehydrogenase family, member 11	-0.241212	0.677946	382.5	692	469	852
Acad9	acyl-Coenzyme A dehydrogenase family, member 9	0.163899	0.598621	535	648	472.5	620
Acadl	acyl-Coenzyme A dehydrogenase, long-chain	-0.0839964	0.83539	950	1046	862	1357
Acadm	acyl-Coenzyme A dehydrogenase, medium chain	0.667571	0.0149405	1214	1168	561	1035
Acads	acyl-Coenzyme A dehydrogenase, short chain	0.108071	0.824329	456	563	385	602
Acadsb	acyl-Coenzyme A dehydrogenase, short/branched chain	0.546435	0.130761	194	225.5	131.5	165
Acadvl	acyl-Coenzyme A dehydrogenase, very long chain	0.177106	0.556768	1242.5	1202	990	1258.5
Acan	aggrecan	-1.88767	0.56979	194	53	851	12
Acap1	ArfGAP with coiled-coil, ankyrin repeat and PH domains 1	-1.31498	3.31e-05	167	228	348	690
Acap2	ArfGAP with coiled-coil, ankyrin repeat and PH domains 2	-0.176406	0.674802	793	1225	1112	1197
Acap3	ArfGAP with coiled-coil, ankyrin repeat and PH domains 3	-0.201297	0.575407	645	925	859	981
Acat1	acetyl-Coenzyme A acetyltransferase 1	0.314782	0.117882	1251	1366	967	1210
Acat2	acetyl-Coenzyme A acetyltransferase 2	0.252746	0.662127	112	151	92	137
Acbd3	acyl-Coenzyme A binding domain containing 3	-0.277879	0.378976	562	766	790.5	848
Acbd4	acyl-Coenzyme A binding domain containing 4	0.237616	0.657038	161	191	129	181
Acbd5	acyl-Coenzyme A binding domain containing 5	0.104296	0.826823	366.33	507.67	343.17	499
Acbd6	acyl-Coenzyme A binding domain containing 6	0.0502311	0.938472	333	316	279	375
Accs	1-aminocyclopropane-1-carboxylate synthase (non-functional)	0.417713	0.351607	153	200	125	146
Accsl	1-aminocyclopropane-1-carboxylate synthase (non-functional)-like	-1.77554	0.510471	7	2	4	32
Acd	adrenocortical dysplasia	-0.230486	0.430299	425	476	473	623
Ace	angiotensin I converting enzyme (peptidyl-dipeptidase A) 1	1.05034	1.85e-07	2016	3142	1135	1408
Ace2	angiotensin I converting enzyme (peptidyl-dipeptidase A) 2	0.876869	0.554025	32	16	20	6
Acer1	alkaline ceramidase 1	0.900382	0.501015	26	11	15	5
Acer2	alkaline ceramidase 2	0.808079	0.339596	131.5	63.25	54	63.5
Ache	acetylcholinesterase	2.03721	0.0167348	217	78	50	23
Acin1	apoptotic chromatin condensation inducer 1	-0.291406	0.127565	1403.5	1631	1752	2068.75
Ackr2	atypical chemokine receptor 2	0.351962	0.717718	136	123	58	163
Ackr3	atypical chemokine receptor 3	0.499365	0.213903	6115	4910.5	2680	5767
Acly	ATP citrate lyase	0.0164233	0.978452	1520	2230	1745	2034
Aco1	aconitase 1	0.0591447	0.898046	1652	2319	1556	2405
Aco2	aconitase 2, mitochondrial	0.37128	0.0442041	5638.65	5626.7	3739.2	5383.88
Acot1	acyl-CoA thioesterase 1	0.775777	0.647541	21	17.83	14.5	9
Acot11	acyl-CoA thioesterase 11	-0.525315	0.42905	68.5	96.5	127.5	109
Acot13	acyl-CoA thioesterase 13	0.970342	0.100053	175	113	52	107
Acot2	acyl-CoA thioesterase 2	0.1196	0.887924	115	137.17	112.5	126
Acot3	acyl-CoA thioesterase 3	0.171654	0.860205	74.5	111.5	80	88.5
Acot7	acyl-CoA thioesterase 7	-0.660093	0.00242451	414	535	726	806
Acot8	acyl-CoA thioesterase 8	-0.0293333	0.973091	188	192.5	183	218
Acot9	acyl-CoA thioesterase 9	-0.0247779	0.966137	878	1160	955	1174
Acox1	acyl-Coenzyme A oxidase 1, palmitoyl	-0.231195	0.441818	575.5	658.5	707	778.5
Acox2	acyl-Coenzyme A oxidase 2, branched chain	1.12589	NA	8	5	4	2
Acox3	acyl-Coenzyme A oxidase 3, pristanoyl	0.0837209	0.851368	558	739	579	674
Acoxl	acyl-Coenzyme A oxidase-like	-1.01445	NA	2	2	1	8
Acp1	acid phosphatase 1, soluble	0.275747	0.268217	1096	1309	831	1240
Acp2	acid phosphatase 2, lysosomal	0.0564362	0.87024	1565	1687.5	1377	1878.5
Acp5	acid phosphatase 5, tartrate resistant	-0.333431	0.279643	632	903	743	1279
Acp6	acid phosphatase 6, lysophosphatidic	-0.108435	0.883161	200	200	208	237
Acpp	acid phosphatase, prostate	-0.277865	0.819484	101	73	146	62
ACPT	-	-0.721592	0.613065	22	15	40	21
Acrbp	proacrosin binding protein	0.48026	0.717718	31	24	24	16
Acsbg1	acyl-CoA synthetase bubblegum family member 1	1.06702	0.755221	63	5	29	3
Acsf2	acyl-CoA synthetase family member 2	-0.0631396	0.928279	438	386	344	568
Acsl1	acyl-CoA synthetase long-chain family member 1	0.276823	0.68418	1255	976	574	1439
Acsl3	acyl-CoA synthetase long-chain family member 3	0.451461	0.195902	417	376	291	307
Acsl4	acyl-CoA synthetase long-chain family member 4	-0.316392	0.312851	792	1106	1179	1216
Acsl5	acyl-CoA synthetase long-chain family member 5	-0.0261025	0.96997	1852	2756.5	1865.5	3013.5
Acsl6	acyl-CoA synthetase long-chain family member 6	2.47447	0.00149416	92	54	6	23
Acsm1	acyl-CoA synthetase medium-chain family member 1	0.822028	NA	3	2	1	2
Acsm3	acyl-CoA synthetase medium-chain family member 3	0.0253928	0.989514	72	51.5	85.5	34
Acss1	acyl-CoA synthetase short-chain family member 1	0.265323	0.669524	221	245	140	271
Acss2	acyl-CoA synthetase short-chain family member 2	0.157379	0.719474	503	518	373	589
Acss3	acyl-CoA synthetase short-chain family member 3	0.42697	0.714244	115	245.5	56	234
Acta1	actin, alpha 1, skeletal muscle	2.26221	0.000703402	66151	23514	8312	11960
Acta2	actin, alpha 2, smooth muscle, aorta	-0.545919	0.368535	1977	2887	4558	2307
Actb	actin, beta	-0.0807198	0.824329	55781	81866.5	66474	82408
Actbl2	actin, beta-like 2	0.651581	0.894859	31	1	19	1
Actc1	actin, alpha, cardiac muscle 1	1.51425	0.378212	276	46	79	37
Actg1	actin, gamma, cytoplasmic 1	-0.103696	0.713506	49200.7	66455	58019.7	69135.5
Actg2	actin, gamma 2, smooth muscle, enteric	0.17319	0.839399	230	204	215	176
Actl6a	actin-like 6A	-0.0285692	0.963943	419	452.5	387	538
Actn1	actinin, alpha 1	-0.278299	0.70921	1051	1373	1852	1016
Actn2	actinin alpha 2	2.3424	2.92e-06	1934	666	287	252
Actn3	actinin alpha 3	2.4804	0.000532672	19502.5	6323	2416	2507.5
Actn4	actinin alpha 4	-0.380138	0.276843	4068.5	5440.5	6752	5620
Actr10	ARP10 actin-related protein 10	0.100748	0.734241	1224	1341	1061	1424
Actr1a	ARP1 actin-related protein 1A, centractin alpha	-0.119776	0.599295	2630	3132	2889	3563
Actr1b	ARP1 actin-related protein 1B, centractin beta	0.175342	0.551047	1204	1256	1048	1197
Actr2	ARP2 actin-related protein 2	-0.132302	0.762978	2427	3882	3310	3694
Actr3	ARP3 actin-related protein 3	-0.268623	0.347832	5672	8352	8212	8916
Actr3b	ARP3 actin-related protein 3B	1.06347	0.299277	45	47	23	22
Actr5	ARP5 actin-related protein 5	-0.37758	0.571872	90	90	114	127
Actr6	ARP6 actin-related protein 6	-0.250045	0.490906	234	268	265	354
Actr8	ARP8 actin-related protein 8	-0.0696963	0.893015	323	421	343	463.5
Acvr1	activin A receptor, type 1	-0.198087	0.729783	229	260	290	281
Acvr1b	activin A receptor, type 1B	-0.185203	0.771787	261	291	346	287
Acvr1c	activin A receptor, type IC	1.41308	NA	10	19	1	11
Acvr2a	activin receptor IIA	-0.00016163	0.999533	220	260	190	313
Acvr2b	activin receptor IIB	-0.0331312	0.991709	14	11	15	11
Acvrl1	activin A receptor, type II-like 1	0.33257	0.182105	1536	2183	1259	1793
Acy1	aminoacylase 1	0.159023	0.719629	519	473	395	534
Acy3	aspartoacylase (aminoacylase) 3	0.00745478	0.994694	240	192	234	206
Acyp1	acylphosphatase 1, erythrocyte (common) type	0.0433753	0.968777	133	145	100	185
Acyp2	acylphosphatase 2, muscle type	1.45064	0.00577584	255	150	64	94
Ada	adenosine deaminase	-0.0252763	0.97034	418	534	406	601
Adal	adenosine deaminase-like	0.341097	0.675879	62	62	43	59
Adam10	a disintegrin and metallopeptidase domain 10	-0.0449639	0.928279	920	1305	1066	1281.5
Adam11	a disintegrin and metallopeptidase domain 11	2.48885	0.0456202	50	15	8	4
Adam15	a disintegrin and metallopeptidase domain 15 (metargidin)	-0.402987	0.110205	2017	2454	3033.5	2961
Adam17	a disintegrin and metallopeptidase domain 17	-0.39255	0.0198399	1770	2327	2409	3133
Adam19	a disintegrin and metallopeptidase domain 19 (meltrin beta)	-0.157465	0.800028	2086	3562	3441	2793
Adam1a	a disintegrin and metallopeptidase domain 1a	0.121655	0.944903	67	32	45	51
Adam23	a disintegrin and metallopeptidase domain 23	-0.297454	0.675939	180	438	341	424
Adam32	a disintegrin and metallopeptidase domain 32	-2.20568	NA	3	1	3	18
Adam4	a disintegrin and metallopeptidase domain 4	-0.465676	0.8676	6.5	6	4	14.5
ADAM4L1	-	0.0769933	0.97728	20.5	14	14	20.5
Adam9	a disintegrin and metallopeptidase domain 9 (meltrin gamma)	0.324617	0.0798408	2542	3034	1863	2780
Adamts1	a disintegrin-like and metallopeptidase (reprolysin type) with thrombospondin type 1 motif, 1	-0.313904	0.377474	677	578	683	956
Adamts10	a disintegrin-like and metallopeptidase (reprolysin type) with thrombospondin type 1 motif, 10	0.136289	0.723864	943	886	745.5	991
Adamts12	a disintegrin-like and metallopeptidase (reprolysin type) with thrombospondin type 1 motif, 12	0.258259	0.103158	3946	4307	3107	4051
Adamts14	a disintegrin-like and metallopeptidase (reprolysin type) with thrombospondin type 1 motif, 14	-1.42786	0.0108901	242	279	954.5	400.5
Adamts15	a disintegrin-like and metallopeptidase (reprolysin type) with thrombospondin type 1 motif, 15	-0.0197893	0.979301	1262	1045	904	1593
Adamts18	a disintegrin-like and metallopeptidase (reprolysin type) with thrombospondin type 1 motif, 18	0.283335	0.919925	67	17	53	16
Adamts19	a disintegrin-like and metallopeptidase (reprolysin type) with thrombospondin type 1 motif, 19	0.591366	0.674694	21	22	11	19
Adamts2	a disintegrin-like and metallopeptidase (reprolysin type) with thrombospondin type 1 motif, 2	0.192632	0.483348	2610.5	3085.5	2023.5	3193.5
Adamts3	a disintegrin-like and metallopeptidase (reprolysin type) with thrombospondin type 1 motif, 3	-1.80965	0.117431	13	6	40	28
Adamts4	a disintegrin-like and metallopeptidase (reprolysin type) with thrombospondin type 1 motif, 4	-1.06746	0.00195513	118.5	135	271.5	268
Adamts5	a disintegrin-like and metallopeptidase (reprolysin type) with thrombospondin type 1 motif, 5 (aggrecanase-2)	0.0613128	0.95672	569	1149	509	1227
Adamts7	a disintegrin-like and metallopeptidase (reprolysin type) with thrombospondin type 1 motif, 7	-0.352571	0.229284	487	493	572	727
Adamts9	a disintegrin-like and metallopeptidase (reprolysin type) with thrombospondin type 1 motif, 9	0.606399	0.228375	471	314	197	358
Adamtsl3	ADAMTS-like 3	1.94015	0.135954	37	21	7	9
Adamtsl4	ADAMTS-like 4	0.611931	0.000828451	1835	2488	1281	1626
Adamtsl5	ADAMTS-like 5	0.424411	0.238916	255	358.5	220	246
Adap1	ArfGAP with dual PH domains 1	-0.889204	0.0185553	108	205	272	315
Adap2	ArfGAP with dual PH domains 2	-0.215588	0.732636	211	239	273	258
Adar	adenosine deaminase, RNA-specific	-0.28239	0.57348	785	1132	1292	1028
Adarb1	adenosine deaminase, RNA-specific, B1	0.749555	2.94e-05	757	906	427	600
Adat1	adenosine deaminase, tRNA-specific 1	0.336944	0.736664	60	71	52	54
Adat2	adenosine deaminase, tRNA-specific 2	-0.119245	0.929364	44	61	57	59
Adat3	adenosine deaminase, tRNA-specific 3	-0.787869	0.182217	59	71	124	101.5
Adck1	aarF domain containing kinase 1	0.00378076	0.998116	89	90	87	97
Adck2	aarF domain containing kinase 2	0.24682	0.584613	212	224	163	219
ADCK3	-	1.80002	0.000557532	1441	537	214	412
ADCK4	-	-0.307166	0.5509	302	238	291	413
Adck5	aarF domain containing kinase 5	-0.198649	0.683341	220	223	219	312.5
Adcy1	adenylate cyclase 1	0.277281	0.947566	8	6	10	1
Adcy10	adenylate cyclase 10	-0.654372	0.714349	7	31.5	23.5	38.5
Adcy2	adenylate cyclase 2	0.410308	0.555577	143	293	131	206
Adcy3	adenylate cyclase 3	-0.0583763	0.924994	421	565	513	530
Adcy4	adenylate cyclase 4	0.412189	0.249087	451	733	357	564
Adcy5	adenylate cyclase 5	0.0739708	0.90909	211	250	201	251
Adcy6	adenylate cyclase 6	0.0641821	0.89367	776	903	791	852
Adcy7	adenylate cyclase 7	0.0438146	0.970296	794	1859	1279	1276
Adcy8	adenylate cyclase 8	-1.02956	NA	1	0	2	0
Adcyap1r1	adenylate cyclase activating polypeptide 1 receptor 1	-1.14647	0.260708	40	40	28	171
Add1	adducin 1 (alpha)	0.0861775	0.7578	3358.5	4316	3118	4372
Add2	adducin 2 (beta)	-0.0452959	0.984954	34	51	17	79
Add3	adducin 3 (gamma)	0.73383	0.00300155	2719	4338	1670	2736
Adgrb2	adhesion G protein-coupled receptor B2	1.50801	0.237296	37	17	5	16
Adgre1	adhesion G protein-coupled receptor E1	0.433788	0.410002	1990	2418	932	2600
Adgre5	adhesion G protein-coupled receptor E5	-0.640539	0.00482327	2487	3443	4701.5	4633
Adgrf5	adhesion G protein-coupled receptor F5	0.978623	4.36e-05	1681	1406	651	1007
Adgrg1	adhesion G protein-coupled receptor G1	0.155296	0.883057	716	379	595.5	408
Adgrg2	adhesion G protein-coupled receptor G2	-0.548939	0.507016	99	142	222	122
Adgrg5	adhesion G protein-coupled receptor G5	-0.623188	0.33618	102	151	235	148
Adgrg7	adhesion G protein-coupled receptor G7	0.403626	0.857705	11	19	11	12
Adgrl1	adhesion G protein-coupled receptor L1	-0.109518	0.879026	285	412	406	347
Adgrl2	adhesion G protein-coupled receptor L2	0.729971	0.00347197	510	479	280	339
Adgrl3	adhesion G protein-coupled receptor L3	-0.555567	0.811221	5	10	12	10
Adgrl4	adhesion G protein-coupled receptor L4	0.599009	0.0391121	1271	998	676	898
Adh1	alcohol dehydrogenase 1 (class I)	2.86652	0.00222544	56	27	6	6
Adh5	alcohol dehydrogenase 5 (class III), chi polypeptide	0.435584	0.0478923	1236	1301	767	1203
Adh6a	alcohol dehydrogenase 6A (class V)	-0.73656	0.746719	11	3	19	4
Adh7	alcohol dehydrogenase 7 (class IV), mu or sigma polypeptide	2.16798	3.38e-07	136	141	28	36
Adhfe1	alcohol dehydrogenase, iron containing, 1	0.636784	0.648535	63	28	17	48
Adi1	acireductone dioxygenase 1	-0.240668	0.648535	168	230	188	302
Adipoq	adiponectin, C1Q and collagen domain containing	0.652507	0.784381	1395	1069	136	1688
Adipor1	adiponectin receptor 1	-0.269433	0.228375	2673	2953	2759	4359
Adipor2	adiponectin receptor 2	0.235406	0.47987	468	525	415	450
Adk	adenosine kinase	0.660668	0.00486584	927	1249	682	717
Adm	adrenomedullin	0.141376	0.906432	148	374	153	340
Adm2	adrenomedullin 2	-2.04407	NA	0	4	12	3
Adnp	activity-dependent neuroprotective protein	-0.029091	0.950999	1054	1197	968	1429
Adnp2	ADNP homeobox 2	-0.149206	0.758879	257	318	277	384.5
Ado	2-aminoethanethiol (cysteamine) dioxygenase	-0.414499	0.550528	59	79	89	99
Adora1	adenosine A1 receptor	0.123629	0.978452	14	5	3	17
Adora2a	adenosine A2a receptor	-0.777881	0.188969	112	210	173	410
Adora2b	adenosine A2b receptor	-0.755399	0.14585	114	181	162	365
Adora3	adenosine A3 receptor	1.12209	0.35301	19.5	33.5	8.5	18.5
Adpgk	ADP-dependent glucokinase	-0.472743	0.0301571	512.5	620	708	915
Adprh	ADP-ribosylarginine hydrolase	-0.120168	0.751615	540	561	532	713
Adprhl1	ADP-ribosylhydrolase like 1	3.76245	0.00290927	49.5	13.5	3	2.5
Adprhl2	ADP-ribosylhydrolase like 2	-0.229772	0.468502	362	439	437	530
Adprm	ADP-ribose/CDP-alcohol diphosphatase, manganese dependent	-0.113902	0.828649	273	346	298	394
Adra1a	adrenergic receptor, alpha 1a	1.25053	0.461269	12	17	3	10
Adra1b	adrenergic receptor, alpha 1b	1.9495	0.276322	8	23	4	4
Adra1d	adrenergic receptor, alpha 1d	0.257685	0.928533	5	19	5	16
Adra2a	adrenergic receptor, alpha 2a	0.429728	0.631471	112	85	49	109
Adra2b	adrenergic receptor, alpha 2b	1.24428	NA	17	6	2	9
Adrb2	adrenergic receptor, beta 2	0.281588	0.734241	174	145	148	119
Adrb3	adrenergic receptor, beta 3	0.662459	0.860484	8	10	0	13
ADRBK1	-	-0.42321	0.0225544	1088	1398	1410	2052
ADRBK2	-	-0.389096	0.57148	116	248	213	270
Adrm1	adhesion regulating molecule 1	-0.841287	7e-06	637	681	1127	1306
Adsl	adenylosuccinate lyase	0.366816	0.299903	588	490	369	509
Adss	adenylosuccinate synthetase, non muscle	-0.29774	0.21531	1332	1858	1857	2145
Adtrp	androgen dependent TFPI regulating protein	-0.604243	0.719899	22	12	38	13
Aebp1	AE binding protein 1	0.284438	0.143725	12190	16636	10734.5	13570
Aebp2	AE binding protein 2	-0.4805	0.392054	94	169	188	180
Aen	apoptosis enhancing nuclease	-0.0615387	0.933056	259	366.5	332	328
Aes	-	0.211826	0.237301	3505	4025	2875	3871
Afap1	actin filament associated protein 1	-0.289115	0.708613	233	433	459	341
Afap1l1	actin filament associated protein 1-like 1	1.1285	0.00618016	382	251	131	175
Afap1l2	actin filament associated protein 1-like 2	0.411804	0.56235	281.5	161	175	172
Aff1	AF4/FMR2 family, member 1	-0.390518	0.243341	339	413	489	517
Aff3	AF4/FMR2 family, member 3	0.985341	0.0205078	129	191	81	83
Aff4	AF4/FMR2 family, member 4	0.00633964	0.9896	1569	2071	1630	2102
Afg3l1	AFG3-like AAA ATPase 1	-0.356305	0.257255	403	579	605	675
Afg3l2	AFG3-like AAA ATPase 2	-0.504607	0.018006	536	604	752	917
Afmid	arylformamidase	-0.0108212	0.994369	60.81	54.64	48.35	74.85
Aftph	aftiphilin	-0.0175859	0.974792	712	959	735	1013
Aga	aspartylglucosaminidase	0.265533	0.325565	1287	1652	981	1573
Agap1	ArfGAP with GTPase domain, ankyrin repeat and PH domain 1	-0.487441	0.0602782	643	662	749	1174
Agap2	ArfGAP with GTPase domain, ankyrin repeat and PH domain 2	-0.668939	0.1913	86	126	152	194
Agap3	ArfGAP with GTPase domain, ankyrin repeat and PH domain 3	-0.108762	0.737669	796	1024	877	1148
Agbl5	ATP/GTP binding protein-like 5	-0.230799	0.864717	38	48	50	53
Ager	advanced glycosylation end product-specific receptor	0.200969	0.845715	63	64	49	66
Agfg1	ArfGAP with FG repeats 1	-0.142218	0.613065	1318	1684	1434	1998
Agfg2	ArfGAP with FG repeats 2	0.470071	0.359063	219	251.5	130.5	228.5
Agk	acylglycerol kinase	-0.181172	0.714221	265	320	285	404
Agl	amylo-1,6-glucosidase, 4-alpha-glucanotransferase	1.47034	0.000517512	3350	1522	795	1092
Agmat	agmatine ureohydrolase (agmatinase)	-0.796584	0.636773	9	14	26	13
Agmo	alkylglycerol monooxygenase	0.596412	0.542589	160	85	57	120
Ago1	argonaute RISC catalytic subunit 1	-0.274676	0.396581	315	386	405	465
Ago2	argonaute RISC catalytic subunit 2	-0.616219	0.13894	142	189	264	249
Ago3	argonaute RISC catalytic subunit 3	-0.039418	0.977492	65	73	72	73
Ago4	argonaute RISC catalytic subunit 4	-0.270295	0.731694	76	71.5	80	106
Agpat1	1-acylglycerol-3-phosphate O-acyltransferase 1 (lysophosphatidic acid acyltransferase, alpha)	-0.231394	0.359063	1036.5	1191	1086	1645.5
Agpat2	1-acylglycerol-3-phosphate O-acyltransferase 2 (lysophosphatidic acid acyltransferase, beta)	-0.465804	0.410986	140	110	141	225
Agpat3	1-acylglycerol-3-phosphate O-acyltransferase 3	0.270117	0.592942	328	335	201	383
Agpat4	1-acylglycerol-3-phosphate O-acyltransferase 4 (lysophosphatidic acid acyltransferase, delta)	-0.308296	0.169148	808	845	948	1171
Agpat5	1-acylglycerol-3-phosphate O-acyltransferase 5 (lysophosphatidic acid acyltransferase, epsilon)	-0.137472	0.790202	363	493	368	615.5
AGPAT6	-	-0.0102253	0.98131	1261	1458	1237	1596
AGPAT9	-	-1.08974	0.0120665	89	76	177	185
Agps	alkylglycerone phosphate synthase	-0.112388	0.875956	322	550	464	486
Agr2	anterior gradient 2	1.53801	NA	10	2	4	0
Agrn	agrin	0.320215	0.26156	1201	1519	1110	1100
Agrp	agouti related neuropeptide	0.350569	NA	4	12	4	9
Agt	angiotensinogen (serpin peptidase inhibitor, clade A, member 8)	0.675528	0.561945	584	312	91	556
Agtpbp1	ATP/GTP binding protein 1	0.317847	0.519967	630	571.5	535	444
Agtr1a	angiotensin II receptor, type 1a	0.754017	0.146607	1479	2124	550	1765
Agtr2	angiotensin II receptor, type 2	0.158147	0.972229	25	7	6	27
Agtrap	angiotensin II, type I receptor-associated protein	-0.184994	0.619963	381	489	441	580
Agxt	alanine-glyoxylate aminotransferase	-2.416	0.228375	1	6	7	33
Ahctf1	AT hook containing transcription factor 1	-0.0674704	0.825982	1211.5	1468	1270.5	1629.5
Ahcy	S-adenosylhomocysteine hydrolase	-0.0733462	0.879929	1029	1174	894	1549
Ahcyl1	S-adenosylhomocysteine hydrolase-like 1	0.0416452	0.928641	2308	3128.5	2173.5	3317
Ahcyl2	S-adenosylhomocysteine hydrolase-like 2	0.181363	0.660975	353	454	296	444
Ahdc1	AT hook, DNA binding motif, containing 1	-0.111099	0.811748	382	494	412	567
Ahi1	Abelson helper integration site 1	0.00928877	0.992205	209.5	253.75	217.25	257
Ahnak	AHNAK nucleoprotein (desmoyokin)	-0.0992323	0.781838	30690.9	41639.9	38078.9	40602.9
Ahr	aryl-hydrocarbon receptor	0.287883	0.373362	834	781	651	714
Ahrr	aryl-hydrocarbon receptor repressor	-0.71388	0.589789	15	12	30	14
Ahsa1	AHA1, activator of heat shock protein ATPase 1	-0.279009	0.402547	1275	1331	1195	2158
Ahsa2	AHA1, activator of heat shock protein ATPase 2	-0.489604	0.058968	462	484.5	531.17	867
AHSP	-	0.853136	0.463234	66	64	13	67
Aida	axin interactor, dorsalization associated	0.046324	0.934941	1911	2870	2255	2436
Aif1	allograft inflammatory factor 1	0.151958	0.535333	2838	3720	2665	3411
Aif1l	allograft inflammatory factor 1-like	0.585451	0.30261	315	684	218	478
Aifm1	apoptosis-inducing factor, mitochondrion-associated 1	0.0923843	0.868641	508	738	451	769
Aifm2	apoptosis-inducing factor, mitochondrion-associated 2	0.0664737	0.898165	398	476	379	483
Aifm3	apoptosis-inducing factor, mitochondrion-associated 3	-0.200453	0.935966	14	12	10	22
Aig1	androgen-induced 1	-0.539675	0.0895512	394	593	552	945
Aimp1	aminoacyl tRNA synthetase complex-interacting multifunctional protein 1	-0.117905	0.7578	470	524	481	638
Aimp2	aminoacyl tRNA synthetase complex-interacting multifunctional protein 2	0.0757394	0.86915	491	507	446	533
Aip	aryl-hydrocarbon receptor-interacting protein	-0.245797	0.339274	518	628	616	787
Ajuba	ajuba LIM protein	0.295834	0.671847	215	201	192	151
Ak1	adenylate kinase 1	0.945768	0.0288389	1917	1080	849.67	763
Ak2	adenylate kinase 2	-0.489441	0.00841984	717	871	939	1382
Ak3	adenylate kinase 3	0.57799	0.00332921	1399	1884.5	928	1352.07
Ak4	adenylate kinase 4	-0.489778	0.667041	47	82	113	63
Ak6	adenylate kinase 6	-0.274531	0.42917	409	527.83	449.17	735.83
Akap1	A kinase (PRKA) anchor protein 1	0.0935496	0.865537	426	551	467	462
Akap10	A kinase (PRKA) anchor protein 10	-0.0591837	0.904172	455	604	479	662
Akap11	A kinase (PRKA) anchor protein 11	0.245042	0.275574	868	1048	738	930
Akap12	A kinase (PRKA) anchor protein (gravin) 12	0.67479	0.0350543	1613	1917	744	1616
Akap13	A kinase (PRKA) anchor protein 13	-0.131408	0.745486	3037	4092.5	3997	3890
Akap14	A kinase (PRKA) anchor protein 14	-0.777183	0.751042	2	7	5	11
AKAP17A	-	-0.517543	0.0528312	480	484	695	720
Akap2	-	-0.387599	0.463669	964	829.5	1376	987
Akap3	A kinase (PRKA) anchor protein 3	-0.633798	0.796415	4	10	14	7
Akap5	A kinase (PRKA) anchor protein 5	-0.608452	NA	6	7	11	9
Akap6	A kinase (PRKA) anchor protein 6	1.23926	0.0388367	187	97	63	63
Akap7	A kinase (PRKA) anchor protein 7	-0.296737	0.756266	50	67	77	68
Akap8	A kinase (PRKA) anchor protein 8	0.0338815	0.943936	946	958	861	1067
Akap8l	A kinase (PRKA) anchor protein 8-like	0.0986094	0.82339	415	487	381	490
Akap9	A kinase (PRKA) anchor protein (yotiao) 9	0.0559298	0.912729	1044	1357	1154	1193
Akip1	A kinase (PRKA) interacting protein 1	-0.113832	0.858461	157.5	207.88	178.6	229.25
Akirin1	akirin 1	-0.214265	0.475627	701	837	725	1141
Akirin2	akirin 2	-0.369015	0.1886	532	526	671	736
Akna	AT-hook transcription factor	-0.610739	0.00160214	456	509	637	897
Aknad1	AKNA domain containing 1	0.783089	0.375573	43	54	17	43
Akr1a1	aldo-keto reductase family 1, member A1 (aldehyde reductase)	-0.104349	0.716788	10751	12689	10311.8	16056.8
AKR1B1	-	-0.0650366	0.849	3279	3685	3064	4548
Akr1b10	aldo-keto reductase family 1, member B10 (aldose reductase)	-2.5103	6.48e-48	198.67	199.83	1008.67	1356.83
Akr1b8	aldo-keto reductase family 1, member B8	-2.68509	3.78e-134	1238.83	1523	7912.33	10455.5
Akr1c12	aldo-keto reductase family 1, member C12	0.795758	0.773661	17	4	6.5	7
Akr1c13	aldo-keto reductase family 1, member C13	-0.856479	0.74584	10	3.5	8.5	19.5
Akr1c14	aldo-keto reductase family 1, member C14	-0.0835421	0.934941	1700	1676	971	2949
Akr1c19	aldo-keto reductase family 1, member C19	0.818592	0.456212	152	60	81	41
AKR1C2	-	-0.583676	NA	1	1	2	1
AKR1C3	-	-1.26638	0.00152629	57	96	149	232
Akr1cl	aldo-keto reductase family 1, member C-like	-0.399417	0.75955	92	62	44	184
AKR1E2	-	-0.0156192	0.991429	136	124	86	197
AKR7A2	-	0.329663	0.266422	773	777.5	512	784
AKR7A3	-	-1.32179	0.519551	4	5	7	17
Akt1	thymoma viral proto-oncogene 1	-0.0983312	0.77145	1910	2578	2232	2690
Akt1s1	AKT1 substrate 1 (proline-rich)	-0.000725657	0.999131	657	562	581	687
Akt2	thymoma viral proto-oncogene 2	0.159074	0.506222	1476	1807	1340	1692
Akt3	thymoma viral proto-oncogene 3	0.00852119	0.994048	207	231	231	211
Aktip	thymoma viral proto-oncogene 1 interacting protein	0.453052	0.036378	609	700.5	405.5	590
Alad	aminolevulinate, delta-, dehydratase	0.189685	0.648971	335	396	288	375
Alas1	aminolevulinic acid synthase 1	-0.33266	0.21828	636	868	771	1200
Alas2	aminolevulinic acid synthase 2, erythroid	0.306024	0.880131	931	939	235	1475
Alb	albumin	-2.06423	0.504748	6	3	0	45
Alcam	activated leukocyte cell adhesion molecule	0.240539	0.892635	714	3007	1501	1584
Aldh16a1	aldehyde dehydrogenase 16 family, member A1	-0.50083	0.00610474	923	1146	1279	1754.5
Aldh18a1	aldehyde dehydrogenase 18 family, member A1	0.250166	0.396581	1519	2015	1478	1540
Aldh1a1	aldehyde dehydrogenase family 1, subfamily A1	2.80636	1.09e-06	569	184.5	55	60
Aldh1a2	aldehyde dehydrogenase family 1, subfamily A2	-1.11772	0.419647	26	23	20	99
Aldh1a3	aldehyde dehydrogenase family 1, subfamily A3	0.555135	0.585078	110	536	178	261
Aldh1a7	aldehyde dehydrogenase family 1, subfamily A7	0.376528	0.936593	1	3.5	1	3
Aldh1l1	aldehyde dehydrogenase 1 family, member L1	0.646655	0.582857	72	28	27	42
Aldh1l2	aldehyde dehydrogenase 1 family, member L2	0.367698	0.218351	1477	2188	1408	1465
Aldh2	aldehyde dehydrogenase 2, mitochondrial	-0.511311	0.000485548	1721	1865	2288	3019
Aldh3a1	aldehyde dehydrogenase family 3, subfamily A1	0.488762	0.236782	226	215	156	168
Aldh3a2	aldehyde dehydrogenase family 3, subfamily A2	0.0414369	0.942344	738	1052	718	1086
Aldh3b1	aldehyde dehydrogenase 3 family, member B1	-1.58738	8.49e-10	270	294	628	1169
Aldh4a1	aldehyde dehydrogenase 4 family, member A1	-0.25174	0.584652	284	254	315	347
Aldh5a1	aldhehyde dehydrogenase family 5, subfamily A1	0.682382	0.258535	127	86	68	70
Aldh6a1	aldehyde dehydrogenase family 6, subfamily A1	0.680197	0.0177952	785	711	363.5	627
Aldh7a1	aldehyde dehydrogenase family 7, member A1	-0.00433468	0.994048	1140	1400	1207	1407
Aldh8a1	aldehyde dehydrogenase 8 family, member A1	1.75616	0.23928	17	21	3	9
Aldh9a1	aldehyde dehydrogenase 9, subfamily A1	0.233484	0.390871	1195	1690.17	1062.5	1470.33
Aldoa	aldolase A, fructose-bisphosphate	0.241741	0.653896	37581.5	23338.5	24500	29804
Aldoc	aldolase C, fructose-bisphosphate	-0.690302	0.142931	96	155	210	197
Alg1	asparagine-linked glycosylation 1 (beta-1,4-mannosyltransferase)	0.0630862	0.930699	223.5	229.5	190	263
ALG10	-	-0.384347	0.410286	180	214	272	249
Alg11	asparagine-linked glycosylation 11 (alpha-1,2-mannosyltransferase)	0.135714	0.795339	275	279	216	311
Alg12	asparagine-linked glycosylation 12 (alpha-1,6-mannosyltransferase)	-0.0111835	0.989514	207	233	193	268
Alg13	asparagine-linked glycosylation 13	-0.0867342	0.900329	234	242	244	277
Alg14	asparagine-linked glycosylation 14	0.214338	0.658562	501	504	322	598
Alg2	asparagine-linked glycosylation 2 (alpha-1,3-mannosyltransferase)	-0.0358882	0.955558	409	500	452	502
Alg3	asparagine-linked glycosylation 3 (alpha-1,3-mannosyltransferase)	-0.0405267	0.945343	336	428	368	439
Alg5	asparagine-linked glycosylation 5 (dolichyl-phosphate beta-glucosyltransferase)	0.351004	0.144623	846	1153	680	939
Alg6	asparagine-linked glycosylation 6 (alpha-1,3,-glucosyltransferase)	0.449204	0.241994	251	365	180.5	289
Alg8	asparagine-linked glycosylation 8 (alpha-1,3-glucosyltransferase)	0.150143	0.802695	204.5	255	198	226
Alg9	asparagine-linked glycosylation 9 (alpha 1,2 mannosyltransferase)	-0.160923	0.692671	292	337	304	427
Alk	anaplastic lymphoma kinase	-0.321211	NA	5	6	3	12
Alkbh1	alkB homolog 1, histone H2A dioxygenase	-0.177672	0.741097	221	352.5	285	380
Alkbh2	alkB homolog 2, alpha-ketoglutarate-dependent dioxygenase	-0.0192953	0.989514	63	69	59	80
Alkbh3	alkB homolog 3, alpha-ketoglutarate-dependent dioxygenase	-0.0581199	0.92139	588	606	640	630
Alkbh4	alkB homolog 4, lysine demethylase	0.0531298	0.970427	80	68	69	79
Alkbh5	alkB homolog 5, RNA demethylase	-0.261089	0.616153	181	231	254	247
Alkbh6	alkB homolog 6	-0.416522	0.383504	178	157	197.67	270
Alkbh7	alkB homolog 7	0.374379	0.371666	212	314.5	172	247
Alkbh8	alkB homolog 8, tRNA methyltransferase	-0.518914	0.571872	49	54	78	72
Alms1	ALMS1, centrosome and basal body associated	0.110169	0.810551	395	492	340	516
Alox12	arachidonate 12-lipoxygenase	0.0959439	0.942248	69	156	98	114
Alox12e	arachidonate lipoxygenase, epidermal	1.27447	0.541977	7	14	3	6
Alox15	arachidonate 15-lipoxygenase	0.658856	0.506405	356	813	129	678
ALOX15B	-	-1.68272	0.648401	1	1	6	0
Alox5	arachidonate 5-lipoxygenase	0.000599582	0.999131	1021	1157	1120	1095
Alox5ap	arachidonate 5-lipoxygenase activating protein	0.0742738	0.915653	786	1328	761	1328
Aloxe3	arachidonate lipoxygenase 3	-0.733631	0.638751	14	9	14	27
Alpk3	alpha-kinase 3	1.9306	0.00368974	450	126	77	85
Alpl	alkaline phosphatase, liver/bone/kidney	0.0241123	0.990929	56	37	51	43
Als2	alsin Rho guanine nucleotide exchange factor	-0.112302	0.853689	246	364	276	406
Als2cr12	-	0.25773	0.927167	7	16	11	8
Alx3	aristaless-like homeobox 3	-1.06014	NA	2	6	7	10
Alx4	aristaless-like homeobox 4	2.65508	NA	3	3	0	1
Alyref	Aly/REF export factor	-0.40998	0.103325	581	649	727	969
Amacr	alpha-methylacyl-CoA racemase	0.0973761	0.881506	210	212	170	242
Ambra1	autophagy/beclin 1 regulator 1	-0.20338	0.5577	373	497	442	592
Amd1	S-adenosylmethionine decarboxylase 1	0.400898	0.0472676	1306	1403	882	1259
Amdhd2	amidohydrolase domain containing 2	-0.539309	0.0079012	739	749	920.5	1344.5
Amer1	APC membrane recruitment 1	0.356418	0.626993	89	111	80	79
Amh	anti-Mullerian hormone	0.988656	0.656767	12	20	5	12
Amhr2	anti-Mullerian hormone type 2 receptor	0.874509	NA	7	10	2	8
Amigo1	adhesion molecule with Ig like domain 1	0.0990369	0.966268	26	20	15	31
Amigo2	adhesion molecule with Ig like domain 2	0.697175	0.166657	192	151.5	81.5	144.5
Amigo3	adhesion molecule with Ig like domain 3	-0.365046	0.585076	84	104	129	116
Ammecr1l	AMME chromosomal region gene 1-like	-0.231484	0.465928	466	565	570	674
Amn1	antagonist of mitotic exit network 1	-0.102169	0.888137	124	158	125	190
Amotl2	angiomotin-like 2	-0.311432	0.282665	1182	1075	1355	1544
Ampd1	adenosine monophosphate deaminase 1	2.3697	0.00303548	3715	1159	468	544
Ampd2	adenosine monophosphate deaminase 2	-0.064577	0.875956	664	793	713	855
Ampd3	adenosine monophosphate deaminase 3	-1.53215	1.38e-08	204	159	473	628
Amph	amphiphysin	0.941063	0.0431648	132	152	54.5	102.5
Amt	aminomethyltransferase	0.383783	0.665024	60	56	43	49
Amz1	archaelysin family metallopeptidase 1	-0.59397	0.0318221	206	250	303	410
Amz2	archaelysin family metallopeptidase 2	0.181348	0.598621	488	537	384	559
Anapc1	anaphase promoting complex subunit 1	0.0243618	0.971084	988	1496	1052	1463
Anapc10	anaphase promoting complex subunit 10	-0.0330216	0.970743	174	189	168	217
Anapc11	anaphase promoting complex subunit 11	-0.0973585	0.740121	1050	1229	1058	1475
Anapc13	anaphase promoting complex subunit 13	0.036527	0.948328	504.5	529.5	446.5	603
Anapc15	anaphase promoting complex C subunit 15	-0.264162	0.43078	466.5	539	473.5	794
Anapc2	anaphase promoting complex subunit 2	0.0663034	0.875956	1340	1828	1440	1649
Anapc4	anaphase promoting complex subunit 4	0.194132	0.441818	849	1044	721	994
Anapc5	anaphase-promoting complex subunit 5	0.0587142	0.839892	4459	4824	3884	5403
Anapc7	anaphase promoting complex subunit 7	-0.305384	0.388105	282	357	362	451
Ang	angiogenin, ribonuclease, RNase A family, 5	0.800016	0.0746713	145.25	223	85.25	134
Angel1	angel homolog 1	-0.00232322	0.998434	141	167	127	195
Angel2	angel homolog 2	0.0746322	0.852788	568.8	694.53	536.43	705.15
Angpt1	angiopoietin 1	0.315419	0.563464	206	202	141	202
Angpt2	angiopoietin 2	0.900303	0.00185915	574.5	494	246	356
Angpt4	angiopoietin 4	0.125094	0.901121	543	1269	520	1221
Angptl1	angiopoietin-like 1	2.45326	1.3e-10	1831.5	991.5	190	372
Angptl2	angiopoietin-like 2	-0.125245	0.837424	4294	3952	5063	4027
Angptl4	angiopoietin-like 4	-1.09546	0.0400581	351	486	411	1545
Angptl6	angiopoietin-like 6	0.11704	0.949434	28	44	30.5	38.5
Ank1	ankyrin 1, erythroid	2.26012	0.000245232	250	101	28	52
Ank3	ankyrin 3, epithelial	0.0439828	0.970743	417	414	482	323
Ankef1	ankyrin repeat and EF-hand domain containing 1	0.214385	0.944929	27	28	4	50
Ankfy1	ankyrin repeat and FYVE domain containing 1	-0.190035	0.555884	1782	2495	2367	2594
ANKH	-	-0.410813	0.0795737	822	1021	1219	1277
Ankhd1	ankyrin repeat and KH domain containing 1	-0.11212	0.756956	867	1198	1042	1242
Ankib1	ankyrin repeat and IBR domain containing 1	-0.222265	0.593162	384	574	495	653
Ankle2	ankyrin repeat and LEM domain containing 2	-0.0703733	0.911374	287.5	391	353.5	371
Ankmy2	ankyrin repeat and MYND domain containing 2	0.346289	0.240333	603	700.5	400	677
Ankra2	ankyrin repeat, family A (RFXANK-like), 2	0.0954735	0.861257	272	343	239	360
Ankrd1	ankyrin repeat domain 1 (cardiac muscle)	1.14563	0.721224	144	9	59	10
Ankrd10	ankyrin repeat domain 10	0.386095	0.169015	407	455	299	384
Ankrd12	ankyrin repeat domain 12	-0.225186	0.485761	891	1250.5	1210.5	1337
Ankrd13a	ankyrin repeat domain 13a	-0.0806718	0.778724	2346	2996	2491	3348
Ankrd13c	ankyrin repeat domain 13c	-0.212557	0.533662	552	617.5	605.5	800
Ankrd13d	ankyrin repeat domain 13 family, member D	-0.0769611	0.946508	87	96	67	138
Ankrd16	ankyrin repeat domain 16	-0.232241	0.826823	40	66	62	64
Ankrd17	ankyrin repeat domain 17	-0.113811	0.678238	1397.5	1732	1553.5	1933.5
Ankrd2	ankyrin repeat domain 2 (stretch responsive muscle)	4.44959	0.000557532	59	21	1	3
Ankrd22	ankyrin repeat domain 22	0.69582	0.824632	15	5	11	1
Ankrd23	ankyrin repeat domain 23	2.39973	8.5e-10	2037	950	262	343
Ankrd24	ankyrin repeat domain 24	0.412833	0.308216	281.5	306.5	168.5	298
Ankrd27	ankyrin repeat domain 27 (VPS9 domain)	-0.107863	0.743158	659	774.5	711.5	881
Ankrd29	ankyrin repeat domain 29	0.673986	0.0738774	247	409	185	235
ANKRD32	-	0.0816287	0.900593	172	196	157	203
Ankrd33b	ankyrin repeat domain 33B	-1.23662	0.0162709	59	48	98	170
Ankrd34a	ankyrin repeat domain 34A	0.175755	0.973662	13	6	15	1
Ankrd34c	ankyrin repeat domain 34C	1.45715	0.449051	6	176	43	17
Ankrd37	ankyrin repeat domain 37	0.855331	0.454735	37	143	59	36
Ankrd39	ankyrin repeat domain 39	0.333421	0.739229	47.12	56.7	34.25	51.95
Ankrd40	ankyrin repeat domain 40	0.018647	0.969126	1086	1251	1035	1354
Ankrd42	ankyrin repeat domain 42	-0.153232	0.857538	77	126	110	119
Ankrd44	ankyrin repeat domain 44	-0.330128	0.40449	396	661	624	725
Ankrd46	ankyrin repeat domain 46	0.347241	0.137171	632	672	454	612
Ankrd49	ankyrin repeat domain 49	0.0776614	0.883057	448	495	362	575
Ankrd50	ankyrin repeat domain 50	-0.185732	0.818497	272	329	410	267
Ankrd52	ankyrin repeat domain 52	-0.371879	0.450104	303	358	479	379
Ankrd54	ankyrin repeat domain 54	0.134695	0.852886	138	163	130	152
Ankrd55	ankyrin repeat domain 55	0.231217	0.887055	54	37	26	58
Ankrd6	ankyrin repeat domain 6	-0.0157365	0.990554	72	89	61	110
Ankrd61	ankyrin repeat domain 61	-0.557558	0.846902	14	4	18	9
Ankrd9	ankyrin repeat domain 9	1.01488	0.132792	176	96	77	62
ANKS1A	-	-0.284649	0.366589	549	512	590	756
Anks1b	ankyrin repeat and sterile alpha motif domain containing 1B	-0.554133	0.821833	11	29	41	14
Anks3	ankyrin repeat and sterile alpha motif domain containing 3	0.262048	0.510373	245	282	189	268
Anks4b	ankyrin repeat and sterile alpha motif domain containing 4B	-0.554333	0.853485	6	5	11	5
Anks6	ankyrin repeat and sterile alpha motif domain containing 6	-0.240528	0.720039	101	141	141	150
Ankzf1	ankyrin repeat and zinc finger domain containing 1	0.224758	0.39228	1080	1208.5	834.5	1208.5
Ano1	anoctamin 1, calcium activated chloride channel	1.24783	0.0606494	140	98	60	42
Ano4	anoctamin 4	-0.298063	NA	5	4	3	9
Ano6	anoctamin 6	-0.273789	0.394315	1999	3031	2996	3152
Anp32a	acidic (leucine-rich) nuclear phosphoprotein 32 family, member A	0.0621974	0.90298	1274	1747	1132	1892
Anp32b	acidic (leucine-rich) nuclear phosphoprotein 32 family, member B	-0.256981	0.320519	1317	1886	1731	2195
Anp32e	acidic (leucine-rich) nuclear phosphoprotein 32 family, member E	-0.101069	0.795339	595	713	677	761
Anpep	alanyl (membrane) aminopeptidase	0.0672109	0.919167	11123	20298	11857	19109
Antxr1	anthrax toxin receptor 1	0.0190282	0.976462	1309	1788	1226	1960
Anxa1	annexin A1	-0.0609513	0.897135	12553	15831	15200	14765
Anxa10	annexin A10	2.56152	0.151364	13.17	9	1	3
Anxa11	annexin A11	-0.412411	0.0718066	2196	2990	3421	3582
Anxa2	annexin A2	-0.274633	0.326688	19559	23869	27128	26061
Anxa3	annexin A3	0.179107	0.700921	758	1246	713	1118
Anxa4	annexin A4	-0.379218	0.01155	5739	7506	7785	9946
Anxa5	annexin A5	-0.577865	0.0171811	12747	12257	19531	18564
Anxa6	annexin A6	0.0145611	0.977874	6574	8365	7239	7832
Anxa7	annexin A7	-0.381267	0.0800372	2317	3311	3449	4029
Anxa8	annexin A8	-0.334554	0.919925	336	231	608	61
Aoah	acyloxyacyl hydrolase	-0.51156	0.196841	212	321	287	507
AOC2-PS1	-	0.376562	0.800028	44	48	26	49
Aoc3	amine oxidase, copper containing 3	0.783205	0.0715659	3045	2223	965	2388
Aox1	aldehyde oxidase 1	0.567308	0.114497	703	627	331	628
Aox2	aldehyde oxidase 2	0.0595141	0.983326	14	12	16	9
Aox3	aldehyde oxidase 3	1.05079	0.226966	507	301	79.21	364.42
Aox4	aldehyde oxidase 4	0.404028	0.913227	8	3	8	0
Ap1ar	adaptor-related protein complex 1 associated regulatory protein	-0.554605	0.0157242	296	341	423	545
Ap1b1	adaptor protein complex AP-1, beta 1 subunit	-0.0760794	0.853743	1980	2286	1777	2950
Ap1g1	adaptor protein complex AP-1, gamma 1 subunit	0.0967563	0.852847	712	1146	766	1014
Ap1m1	adaptor-related protein complex AP-1, mu subunit 1	-0.289413	0.171131	1167	1338	1462	1684
Ap1m2	adaptor protein complex AP-1, mu 2 subunit	-0.752961	0.749614	27	5	49	3
Ap1s1	adaptor protein complex AP-1, sigma 1	-0.400378	0.0158157	911	1065	1197	1495
Ap1s2	adaptor-related protein complex 1, sigma 2 subunit	0.0909995	0.8601	1196	1447	915.5	1706
Ap1s3	adaptor-related protein complex AP-1, sigma 3	0.255512	0.767253	69	102	52	98
Ap2a1	adaptor-related protein complex 2, alpha 1 subunit	-0.524622	0.0232534	690	894	1125	1195
Ap2a2	adaptor-related protein complex 2, alpha 2 subunit	-0.238751	0.413859	3181	4266.5	3437	5757.5
Ap2b1	adaptor-related protein complex 2, beta 1 subunit	-0.220956	0.51703	2399	3867	3296	4159
Ap2m1	adaptor-related protein complex 2, mu 1 subunit	-0.424407	0.00112488	6505	7182	8110	10983.5
Ap2s1	adaptor-related protein complex 2, sigma 1 subunit	-0.449258	0.0172244	1988	1919	2325	3258
Ap3b1	adaptor-related protein complex 3, beta 1 subunit	-0.0393127	0.943066	1091	1555.5	1113.5	1710.5
Ap3d1	adaptor-related protein complex 3, delta 1 subunit	-0.582965	2.75e-05	1810	2295	2728	3625
Ap3m1	adaptor-related protein complex 3, mu 1 subunit	0.0758715	0.864994	1077	1459	1009	1487
Ap3m2	adaptor-related protein complex 3, mu 2 subunit	0.507909	0.374486	125	193	81	153
Ap3s1	adaptor-related protein complex 3, sigma 1 subunit	-0.442592	0.110205	512	782	796	1004
Ap3s2	adaptor-related protein complex 3, sigma 2 subunit	0.208025	0.615622	538	532	370	607
Ap4b1	adaptor-related protein complex AP-4, beta 1	0.0591449	0.917593	318	367	278	407
Ap4e1	adaptor-related protein complex AP-4, epsilon 1	0.0108768	0.991589	194	267	239	223
Ap4m1	adaptor-related protein complex AP-4, mu 1	0.0244025	0.978452	165.5	235	191	211
Ap4s1	adaptor-related protein complex AP-4, sigma 1	0.224532	0.64777	243	253	191	250
Ap5b1	adaptor-related protein complex 5, beta 1 subunit	-0.199292	0.646589	368.03	334.92	353.5	491.25
Ap5m1	adaptor-related protein complex 5, mu 1 subunit	0.141291	0.767475	299	400	272	384
Ap5s1	adaptor-related protein 5 complex, sigma 1 subunit	-0.0895588	0.938338	62	90	82	82
Ap5z1	adaptor-related protein complex 5, zeta 1 subunit	-0.273263	0.458282	275	387	357.5	465
Apaf1	apoptotic peptidase activating factor 1	-0.143246	0.7739	601	952	837	898
Apba1	amyloid beta (A4) precursor protein binding, family A, member 1	-0.243461	0.670021	189	314	295	306
Apba2	amyloid beta (A4) precursor protein-binding, family A, member 2	2.7421	0.0841875	31	15	5	2
Apba3	amyloid beta (A4) precursor protein-binding, family A, member 3	-0.51933	0.0904809	438.5	495	695	664.5
Apbb1	amyloid beta (A4) precursor protein-binding, family B, member 1	0.350683	0.494281	261	310	247	204
Apbb1ip	amyloid beta (A4) precursor protein-binding, family B, member 1 interacting protein	-0.68051	0.0290486	751	1385	1570	1900
Apbb3	amyloid beta (A4) precursor protein-binding, family B, member 3	0.259341	0.665412	253	254	235	193.5
Apc	APC, WNT signaling pathway regulator	0.0298877	0.965938	830	909	879	856.5
Apc2	APC regulator of WNT signaling pathway 2	0.539615	0.311513	146.5	144	80.5	129.5
APEG3	-	1.12351	0.0234887	129.5	117.5	46	74.5
Apeh	acylpeptide hydrolase	-0.116753	0.712484	759	910	813	1058
Apex1	apurinic/apyrimidinic endonuclease 1	-0.100773	0.830616	668	714	604	952
Apex2	apurinic/apyrimidinic endonuclease 2	-0.140683	0.830616	131	140	126	186
Aph1a	aph1 homolog A, gamma secretase subunit	-0.25995	0.285446	1338	1766	1767	2033
Aph1b	aph1 homolog B, gamma secretase subunit	0.121607	0.744263	1555.42	2006.58	1327.5	2088.33
Api5	apoptosis inhibitor 5	0.0622618	0.826823	2124	2567	1998	2651
Apip	APAF1 interacting protein	0.176809	0.790803	136	145	99	162
APITD1	-	-0.0780231	0.936522	96	107	84	141
Aplf	aprataxin and PNKP like factor	-0.0323331	0.961728	294	338	279	393
Apln	apelin	0.89617	0.18026	92	252	85	100
Aplnr	apelin receptor	0.0824318	0.927792	408	309	246	483
Aplp1	amyloid beta (A4) precursor-like protein 1	-0.857905	0.267567	295	191	617	250
Aplp2	amyloid beta (A4) precursor-like protein 2	0.342814	0.030251	5761	7477	4562	6231
Apmap	adipocyte plasma membrane associated protein	0.123953	0.739095	479	591	434	582
Apoa1	apolipoprotein A-I	0.600096	NA	3	10	2	7
APOA1BP	-	0.0665606	0.893015	440	470	375	531
Apoa5	apolipoprotein A-V	-2.03153	NA	1	1	6	2
Apobec1	apolipoprotein B mRNA editing enzyme, catalytic polypeptide 1	-0.351794	0.178401	777	835	834	1327
Apobec2	apolipoprotein B mRNA editing enzyme, catalytic polypeptide 2	2.50829	1.18e-10	2502	1285	374	316
APOBEC3B	-	-0.00428531	0.997791	104	125	93	147
Apobr	apolipoprotein B receptor	-0.587472	0.0615964	195	219	251	401
Apoc1	apolipoprotein C-I	0.880599	0.0431756	210.5	204	90	147
Apoc2	apolipoprotein C-II	3.16199	NA	3	0	0	0
Apoc3	apolipoprotein C-III	-0.0365229	0.993491	4	18	4	20
Apoc4	apolipoprotein C-IV	2.18982	0.397769	24.5	2	4	2
Apod	apolipoprotein D	1.57039	0.00455815	589	225	133	160
Apoe	apolipoprotein E	0.531775	0.0428598	133529	125290	67700	123158
APOL3	-	-0.0181519	0.978452	444.5	484	395	587
Apol9a	apolipoprotein L 9a	-0.0847478	0.93446	689	1223	1203	773
Apold1	apolipoprotein L domain containing 1	-0.587539	0.561359	230	217	124	630
Apom	apolipoprotein M	-1.12613	0.585461	5	6	6	20
Apoo	apolipoprotein O	0.328869	0.526255	217	182	141	192
Apool	apolipoprotein O-like	0.437023	0.151077	295	331	200	281
Apopt1	apoptogenic, mitochondrial 1	0.00333737	0.996524	342	419	293	504
App	amyloid beta (A4) precursor protein	0.0151481	0.979301	9488	14879	10344	14455
Appbp2	amyloid beta precursor protein (cytoplasmic tail) binding protein 2	-0.0899092	0.82747	962	1411	1116	1480
Appl2	adaptor protein, phosphotyrosine interaction, PH domain and leucine zipper containing 2	0.3431	0.393714	598	668	361	698
Aprt	adenine phosphoribosyl transferase	0.121863	0.71722	2803	3350	2286	3635
APTR	-	-0.198962	0.936792	7	15	10	16
Aptx	aprataxin	0.249657	0.704813	128	124	94	127
Aqp1	aquaporin 1	0.20416	0.821794	4296	2355	3558	2309
Aqp11	aquaporin 11	1.17299	0.596968	5	8	2	4
Aqp3	aquaporin 3	-0.149084	0.979238	44	9	55	1
Aqp4	aquaporin 4	3.01318	0.00607454	206	24	15	16
Aqp5	aquaporin 5	-0.663386	NA	0	2	2	1
Aqp7	aquaporin 7	-0.450532	0.879091	21	58	5	116
Aqp9	aquaporin 9	-1.13757	0.416311	8	8	14	23
Aqr	aquarius	-0.0752931	0.876664	697	1017	854	987
Ar	androgen receptor	0.805751	0.167001	135	273	81	162
Araf	Araf proto-oncogene, serine/threonine kinase	0.212538	0.414357	917	1013	768.5	954.5
Arap2	ArfGAP with RhoGAP domain, ankyrin repeat and PH domain 2	-0.180436	0.824623	74	77	80	97
Arc	activity regulated cytoskeletal-associated protein	-0.0958888	0.938418	71	94	90	89
Arcn1	archain 1	0.157308	0.65281	4326	6399	4584	5193
Areg	amphiregulin	0.148782	0.97294	11	2	4	9
Arel1	apoptosis resistant E3 ubiquitin protein ligase 1	-0.220651	0.358874	676	808	762	1030
Arf1	ADP-ribosylation factor 1	-0.0833174	0.773135	4282	5668	4808.5	6023.5
Arf2	ADP-ribosylation factor 2	0.236536	0.582675	749	996	781	711
Arf3	ADP-ribosylation factor 3	-0.341803	0.0380126	2137	2657	2621.5	3681
Arf4	ADP-ribosylation factor 4	0.381331	0.0621963	7848	11085.5	6811.5	8028.5
Arf5	ADP-ribosylation factor 5	-0.130003	0.62203	2300	2648	2496	3092
Arf6	ADP-ribosylation factor 6	-0.672258	2.12e-05	853	979	1373	1633
Arfgap1	ADP-ribosylation factor GTPase activating protein 1	0.086633	0.824819	914	1093	915	1021
Arfgap2	ADP-ribosylation factor GTPase activating protein 2	0.19829	0.537354	1252	1149	958	1223
Arfgap3	ADP-ribosylation factor GTPase activating protein 3	0.00331476	0.995306	1215	1512	1320	1461
Arfgef1	ADP-ribosylation factor guanine nucleotide-exchange factor 1(brefeldin A-inhibited)	-0.110342	0.777464	864	1274	1009	1366
Arfgef2	ADP-ribosylation factor guanine nucleotide-exchange factor 2 (brefeldin A-inhibited)	-0.334433	0.342149	613	961	935	1083
Arfip1	ADP-ribosylation factor interacting protein 1	0.196527	0.629276	585	868	613.5	674
Arfip2	ADP-ribosylation factor interacting protein 2	0.173041	0.679811	802.5	833.5	707	786
Arfrp1	ADP-ribosylation factor related protein 1	-0.19382	0.575407	349	388	386	486
Arg1	arginase, liver	-0.299736	0.809256	219	623	695	273
Arg2	arginase type II	0.676566	0.613855	29	39	14	31
Arglu1	arginine and glutamate rich 1	-0.192912	0.570809	563	655	692	731
Arhgap1	Rho GTPase activating protein 1	0.0475606	0.91134	1766	2412	1894	2241
Arhgap10	Rho GTPase activating protein 10	-0.516155	0.0956871	392	664	683	857
Arhgap11a	Rho GTPase activating protein 11A	-0.468029	0.165838	364	587	552	804
Arhgap12	Rho GTPase activating protein 12	0.0617045	0.9115	407	561	379	585
Arhgap15	Rho GTPase activating protein 15	0.228753	0.68189	239	348	188	336
Arhgap17	Rho GTPase activating protein 17	-0.252763	0.299277	1214	1618	1600	1850
Arhgap18	Rho GTPase activating protein 18	-0.0359883	0.943066	1239	1591	1193	1830
Arhgap20	Rho GTPase activating protein 20	0.765457	0.232183	92	128	42	95
Arhgap21	Rho GTPase activating protein 21	0.14707	0.691819	873	1153	899	964
Arhgap22	Rho GTPase activating protein 22	-0.835676	0.00037956	294	449	590.5	771
Arhgap24	Rho GTPase activating protein 24	-0.444932	0.0866341	273	318	360	473
Arhgap25	Rho GTPase activating protein 25	-0.0498631	0.964612	471	1128	707	970
Arhgap26	Rho GTPase activating protein 26	-0.272078	0.757922	72	152	115	161
Arhgap27	Rho GTPase activating protein 27	-0.974101	0.00271211	205	227	463	394
Arhgap28	Rho GTPase activating protein 28	0.380734	0.403894	293	289	168	306
Arhgap29	Rho GTPase activating protein 29	0.212098	0.434168	955.5	1152	847	1026
Arhgap30	Rho GTPase activating protein 30	-0.632054	0.00205435	897	1317	1602	1900
Arhgap31	Rho GTPase activating protein 31	-0.28567	0.39829	437	517	588	597
Arhgap35	Rho GTPase activating protein 35	-0.128717	0.673398	803	1045	921	1158
Arhgap39	Rho GTPase activating protein 39	-0.167406	0.791803	174	165	190	202
Arhgap4	Rho GTPase activating protein 4	-0.325233	0.329231	484	575	611	757
Arhgap5	Rho GTPase activating protein 5	0.202379	0.676179	324	485	331	386
Arhgap8	Rho GTPase activating protein 8	-0.245856	0.903063	21	29	15	49
Arhgap9	Rho GTPase activating protein 9	-0.112146	0.858535	708.5	1271.5	830.5	1386.5
Arhgdia	Rho GDP dissociation inhibitor (GDI) alpha	-0.435241	0.000958678	10958	13494	14903	19221
Arhgdib	Rho, GDP dissociation inhibitor (GDI) beta	-0.318866	0.346918	3357	4027	3298	6476
Arhgef1	Rho guanine nucleotide exchange factor (GEF) 1	-0.70729	0.000552492	1418	1682	2570	2577
Arhgef11	Rho guanine nucleotide exchange factor (GEF) 11	-0.248308	0.45402	717.5	879	953	978
Arhgef12	Rho guanine nucleotide exchange factor (GEF) 12	0.016557	0.979109	645	770	619	830.5
Arhgef15	Rho guanine nucleotide exchange factor (GEF) 15	0.405195	0.537611	152	111	93	115
Arhgef16	Rho guanine nucleotide exchange factor (GEF) 16	0.594597	0.550528	50	48	23	46
Arhgef18	rho/rac guanine nucleotide exchange factor (GEF) 18	0.211851	0.654592	296	346	228	351
Arhgef19	Rho guanine nucleotide exchange factor (GEF) 19	-0.745307	0.422116	111	134	292	101
Arhgef2	rho/rac guanine nucleotide exchange factor (GEF) 2	-0.405122	0.0224515	1185	1367	1599	1877
Arhgef25	Rho guanine nucleotide exchange factor (GEF) 25	0.350816	0.189796	863.5	1018	742	763
Arhgef28	Rho guanine nucleotide exchange factor (GEF) 28	0.443805	0.395596	103	132	88	88
Arhgef3	Rho guanine nucleotide exchange factor (GEF) 3	0.163891	0.626439	1291	1736	1097	1717
Arhgef37	Rho guanine nucleotide exchange factor (GEF) 37	1.29663	0.16602	78	39	29	20
Arhgef39	Rho guanine nucleotide exchange factor (GEF) 39	0.181395	0.832224	110	114	98	105
Arhgef40	Rho guanine nucleotide exchange factor (GEF) 40	0.238359	0.574246	829	972	818.5	723.5
Arhgef6	Rac/Cdc42 guanine nucleotide exchange factor (GEF) 6	0.142572	0.780033	466	750	474	658
Arhgef7	Rho guanine nucleotide exchange factor (GEF7)	0.267583	0.370542	1156	1042	837	1067
Arhgef9	CDC42 guanine nucleotide exchange factor (GEF) 9	1.07285	0.149664	72	66.33	35.67	30.83
Arid1a	AT rich interactive domain 1A (SWI-like)	-0.310021	0.20542	1192	1420	1616	1686
Arid3a	AT rich interactive domain 3A (BRIGHT-like)	-0.908777	0.0647639	118	112	245	191
Arid3b	AT rich interactive domain 3B (BRIGHT-like)	-0.3964	0.618259	79	99	135	99
Arid4a	AT rich interactive domain 4A (RBP1-like)	0.201317	0.68418	371	626	379	509
Arid4b	AT rich interactive domain 4B (RBP1-like)	0.0495114	0.92068	557	637	556	629
Arid5a	AT rich interactive domain 5A (MRF1-like)	-1.00077	0.000197174	327	285	507	786
Arid5b	AT rich interactive domain 5B (MRF1-like)	-0.247097	0.486363	287	340	353	412
Arih1	ariadne RBR E3 ubiquitin protein ligase 1	-0.176626	0.455429	1022	1233	1117	1525
Arih2	ariadne RBR E3 ubiquitin protein ligase 2	-0.190006	0.474089	743	865	841	1053
Arl1	ADP-ribosylation factor-like 1	0.203316	0.567688	1375	2106	1414	1665
Arl10	ADP-ribosylation factor-like 10	-0.0809662	0.971084	27	40	43	27
Arl11	ADP-ribosylation factor-like 11	-0.585075	0.000762471	1187	1552	1716	2555
Arl13a	ADP-ribosylation factor-like 13A	-0.542036	NA	4	5	8	5
Arl13b	ADP-ribosylation factor-like 13B	0.132148	0.84936	269	254	255	231.5
Arl14ep	ADP-ribosylation factor-like 14 effector protein	0.163587	0.720059	293	303	243	309
Arl2	ADP-ribosylation factor-like 2	-0.148283	0.781149	293	294	288	390
Arl2bp	ADP-ribosylation factor-like 2 binding protein	0.175068	0.466404	1529	1942	1364	1812
Arl3	ADP-ribosylation factor-like 3	0.146662	0.645066	665	783	577	779
Arl4a	ADP-ribosylation factor-like 4A	0.344857	0.455429	355	292	214	324
Arl4c	ADP-ribosylation factor-like 4C	-0.591727	0.0700521	700	890	1312	1090
Arl4d	ADP-ribosylation factor-like 4D	0.766619	0.249239	75	185	65	90
Arl5a	ADP-ribosylation factor-like 5A	-0.136806	0.780761	250	306	289	339
Arl5b	ADP-ribosylation factor-like 5B	-0.636488	0.0348154	236	290	318	540
Arl5c	ADP-ribosylation factor-like 5C	-0.359697	0.508118	100.5	101.5	118.5	151
Arl6	ADP-ribosylation factor-like 6	0.702843	0.251606	117	154	89	79
Arl6ip1	ADP-ribosylation factor-like 6 interacting protein 1	-0.0362405	0.97005	1424	1946	1155	2517
Arl6ip4	ADP-ribosylation factor-like 6 interacting protein 4	-0.260944	0.383831	363	417	423	544
Arl6ip5	ADP-ribosylation factor-like 6 interacting protein 5	0.0540033	0.916115	1129	1706	1267	1519
Arl6ip6	ADP-ribosylation factor-like 6 interacting protein 6	0.103279	0.869781	195	255	204	224
Arl8a	ADP-ribosylation factor-like 8A	-0.636569	0.000107912	1187	1558	1949.5	2437
Arl8b	ADP-ribosylation factor-like 8B	-0.443825	0.00727757	1814	2324	2410	3428
Armc1	armadillo repeat containing 1	0.0233497	0.970656	458	545	442	579
Armc10	armadillo repeat containing 10	0.109139	0.775459	530	668	477	675
Armc3	armadillo repeat containing 3	-0.29534	0.895127	18	60	13	91
Armc5	armadillo repeat containing 5	-0.125662	0.790803	410	488	493	506
Armc6	armadillo repeat containing 6	0.00909405	0.994772	106	163	149.5	116
Armc7	armadillo repeat containing 7	0.206303	0.773135	101	120.5	91	105.5
Armc8	armadillo repeat containing 8	-0.0862824	0.852355	500	609	561	647
Armc9	armadillo repeat containing 9	0.0106679	0.9882	313	384	310	405
Armcx1	armadillo repeat containing, X-linked 1	0.498646	0.0683449	379	525	300	355
Armcx2	armadillo repeat containing, X-linked 2	0.411458	0.224408	347	504	260	404
Armcx3	armadillo repeat containing, X-linked 3	0.403172	0.0312779	1201	1519	880	1254
Armcx6	armadillo repeat containing, X-linked 6	0.791686	0.076845	166	211	76	154
Armt1	acidic residue methyltransferase 1	0.031632	0.966137	264	300	246	326
Arnt	aryl hydrocarbon receptor nuclear translocator	0.114481	0.793469	680	901	678	820
Arnt2	aryl hydrocarbon receptor nuclear translocator 2	-1.87459	4.71e-05	31	74	159	235
Arntl	aryl hydrocarbon receptor nuclear translocator-like	-0.829729	0.0483592	116	168	265	243
Arntl2	aryl hydrocarbon receptor nuclear translocator-like 2	-0.566561	0.584652	32	47.5	71	46
Arpc1a	actin related protein 2/3 complex, subunit 1A	0.0200354	0.965067	1642	2078	1644	2142
Arpc1b	actin related protein 2/3 complex, subunit 1B	-0.375575	0.0270621	7339	9921	9722	13413
Arpc2	actin related protein 2/3 complex, subunit 2	-0.250933	0.127366	6452	8285	7752	10363
Arpc3	actin related protein 2/3 complex, subunit 3	-0.278061	0.130501	3459	4514	4140.5	5880
Arpc4	actin related protein 2/3 complex, subunit 4	-0.507658	0.00182116	2578	3188	3405	5141
Arpc5	actin related protein 2/3 complex, subunit 5	-0.328746	0.0542081	3651	4801	4608	6372
Arpc5l	actin related protein 2/3 complex, subunit 5-like	-0.202391	0.490906	563	715	619.5	908
Arpin	actin-related protein 2/3 complex inhibitor	0.0026858	0.998116	253	300	202	381
Arpp19	cAMP-regulated phosphoprotein 19	0.0175158	0.978173	605	747	583	801
Arpp21	cyclic AMP-regulated phosphoprotein, 21	0.787111	0.583447	72	28	12	54
Arr3	arrestin 3, retinal	-0.883766	0.606226	10	8	18	16
Arrb1	arrestin, beta 1	-0.133378	0.777464	353	493.5	448.5	499
Arrb2	arrestin, beta 2	-0.380589	0.0925373	683.5	744	813	1122.5
Arrdc1	arrestin domain containing 1	-0.444699	0.0185553	658	829	912	1176
Arrdc2	arrestin domain containing 2	0.154229	0.830924	164	196	175	152
Arrdc3	arrestin domain containing 3	-0.272659	0.596888	263	489	387	543
Arrdc4	arrestin domain containing 4	-0.975715	0.00603334	115	188	252	362
Arsa	arylsulfatase A	-0.182804	0.632005	481	494	522	622
Arsb	arylsulfatase B	-0.105878	0.839399	1398.5	1779	1234	2381
ARSE	-	-0.0993074	0.824623	448	494	478	562
Arsg	arylsulfatase G	0.0262449	0.983462	66	86	71	82
Arsi	arylsulfatase i	0.801964	0.240333	154	364	92	219
Arsj	arylsulfatase J	-0.0560602	0.97034	68	74	71	81
Arsk	arylsulfatase K	0.477045	0.211716	186	204	124	167
Art1	ADP-ribosyltransferase 1	2.57559	0.000183161	305.5	91.5	39.5	30.5
Art2b	ADP-ribosyltransferase 2b	-0.899902	NA	3	6	4	14
Art3	ADP-ribosyltransferase 3	0.828841	0.0602782	1742	2128	599	1765
Art4	ADP-ribosyltransferase 4	-0.673341	0.750366	16	4	20	13
Art5	ADP-ribosyltransferase 5	3.05531	0.0014495	100.5	23.5	8.5	8.5
Artn	artemin	-0.775192	0.571945	19	13	27	30
Arv1	ARV1 homolog, fatty acid homeostasis modulator	-0.435765	0.436094	77	88	105	125
Arvcf	armadillo repeat gene deleted in velocardiofacial syndrome	0.413182	0.424347	210	187	160	145
Arx	aristaless related homeobox	1.21665	0.603112	16	6	5	5
As3mt	arsenic (+3 oxidation state) methyltransferase	0.0412729	0.948328	307	330	288	352
Asah1	N-acylsphingosine amidohydrolase 1	-0.225836	0.381749	2458	3558	3113	4119
Asah2	N-acylsphingosine amidohydrolase 2	0.23664	0.76488	95	97	62	110
Asap1	ArfGAP with SH3 domain, ankyrin repeat and PH domain1	-0.24349	0.467411	634	944	880	1024
Asb1	ankyrin repeat and SOCS box-containing 1	-0.433662	0.700921	60	30	56	73
Asb10	ankyrin repeat and SOCS box-containing 10	2.20136	0.0896691	80	16	13	9
Asb11	ankyrin repeat and SOCS box-containing 11	2.39543	0.00218076	291	77	40	34
Asb12	ankyrin repeat and SOCS box-containing 12	2.41843	0.000488043	185	71	24	27
Asb13	ankyrin repeat and SOCS box-containing 13	0.115805	0.899225	118	145	128	118
Asb14	ankyrin repeat and SOCS box-containing 14	2.04794	0.00413486	89	48	16	19
Asb16	ankyrin repeat and SOCS box-containing 16	2.6719	0.0131577	87	26	9	10
Asb2	ankyrin repeat and SOCS box-containing 2	1.48424	0.0782259	192	55	47	47
Asb3	ankyrin repeat and SOCS box-containing 3	0.109755	0.852847	203	253	179	260
Asb5	ankyrin repeat and SOCs box-containing 5	1.84287	0.00322151	227	137	68	34
Asb6	ankyrin repeat and SOCS box-containing 6	-0.252893	0.497623	300.5	335	372	404
Asb7	ankyrin repeat and SOCS box-containing 7	-0.0616755	0.970743	42	74	61	61
Asb8	ankyrin repeat and SOCS box-containing 8	0.376933	0.111853	777	787.5	548	704
Ascc1	activating signal cointegrator 1 complex subunit 1	0.320555	0.168693	578	692	463	587
Ascc2	activating signal cointegrator 1 complex subunit 2	-0.617431	0.0647639	340	507	683	621
Ascc3	activating signal cointegrator 1 complex subunit 3	-0.272814	0.621313	683	1175	1219	1006
Ascl3	achaete-scute family bHLH transcription factor 3	-1.78808	0.341562	4	3	7.5	17.5
Asf1a	anti-silencing function 1A histone chaperone	0.0279151	0.973679	211	226	188	258
Asf1b	anti-silencing function 1B histone chaperone	-0.198999	0.751773	134	212	166	244
Asgr2	asialoglycoprotein receptor 2	0.0982449	0.880131	560	856	481	906
Ash1l	ASH1 like histone lysine methyltransferase	0.0484799	0.920685	1202	1660.5	1338.5	1480
Ash2l	ASH2 like histone lysine methyltransferase complex subunit	0.0226569	0.96997	634	814	618	858
Asic1	acid-sensing (proton-gated) ion channel 1	-1.58941	0.5309	1	7	3	23
Asic2	acid-sensing (proton-gated) ion channel 2	-1.69012	NA	2	0	3	4
Asic4	acid-sensing (proton-gated) ion channel family member 4	0.220358	0.956763	3	10	6	5
Asl	argininosuccinate lyase	-0.0243953	0.969035	617	801	669	812
ASMTL	-	-0.444911	0.0612748	355	390	462	588
Asna1	arsA arsenite transporter, ATP-binding, homolog 1 (bacterial)	-0.270833	0.27132	982	1112	1080	1553
Asns	asparagine synthetase	-0.494005	0.0920715	258	325	405	433
Asnsd1	asparagine synthetase domain containing 1	0.0864984	0.825982	943	959	781	1089
Aspa	aspartoacylase	0.829717	0.116258	212	271	78	214
Aspg	asparaginase	0.49077	0.86626	28	5	21	2
Asphd2	aspartate beta-hydroxylase domain containing 2	-2.53515	NA	0	0	2	0
Aspm	abnormal spindle microtubule assembly	-0.292146	0.614848	172	319	266	347
Aspn	asporin	1.84698	1.52e-18	6239	5757	1750.67	1659.33
Asrgl1	asparaginase like 1	0.509663	0.43572	144	136	69	141
Ass1	argininosuccinate synthetase 1	-0.689552	0.338778	152	166	348	150
Aste1	asteroid homolog 1	0.159725	0.89223	49.5	69	55	53
Astn1	astrotactin 1	0.673537	0.673644	18	28	11	19
Astn2	astrotactin 2	1.5768	0.20542	21	132	32	16.5
ASUN	-	0.0589103	0.910516	394	445	336	505
Atad1	ATPase family, AAA domain containing 1	0.241784	0.266555	1100	1268	935	1129
Atad2	ATPase family, AAA domain containing 2	-0.0362094	0.957848	579	867	641	886
Atad2b	ATPase family, AAA domain containing 2B	-0.142693	0.870931	73	102	86	113
Atad3a	ATPase family, AAA domain containing 3A	-0.179715	0.65212	366	441	437	501
Atat1	alpha tubulin acetyltransferase 1	-0.00280176	0.998434	91.5	101	85	116.5
Atcay	ataxia, cerebellar, Cayman type	-0.096088	NA	6	9	5	12
Ate1	arginyltransferase 1	0.0156927	0.980047	661	744.5	657.5	773
Atf1	activating transcription factor 1	-0.106327	0.771802	727	859	793	966
Atf2	activating transcription factor 2	0.334715	0.329817	436	584	317	528
Atf3	activating transcription factor 3	-0.63117	0.295133	696.5	1863.33	1251.5	2879.67
Atf4	activating transcription factor 4	-0.283987	0.0690817	2952	3502	3509	4624
Atf5	activating transcription factor 5	0.63467	0.016893	1284	1786	1027	965
Atf6	activating transcription factor 6	-0.157737	0.722305	620	931	831	927
Atf6b	activating transcription factor 6 beta	-0.522418	0.00486584	900	1120	1397	1572
Atf7	activating transcription factor 7	-0.131399	0.844364	249	367	348	332.5
Atg10	autophagy related 10	-0.173926	0.818864	137	137	114	214
Atg101	autophagy related 101	-0.00326379	0.996524	443	448	394	537
Atg12	autophagy related 12	0.15957	0.619239	648	730	521	766
Atg13	autophagy related 13	-0.061284	0.904172	494	677	564	689
Atg14	autophagy related 14	0.215229	0.71266	172.5	189	150	170
Atg16l1	autophagy related 16-like 1 (S. cerevisiae)	-0.0337396	0.95672	611	563	546	707
Atg16l2	autophagy related 16-like 2 (S. cerevisiae)	-0.287966	0.578573	130	156	153	209
Atg2a	autophagy related 2A	-0.34902	0.231749	529	520.5	653	723.5
Atg3	autophagy related 3	-0.315854	0.127393	759	967	948	1273
ATG4AL1	-	0.301275	0.359063	382	400.5	270	393
Atg4b	autophagy related 4B, cysteine peptidase	-0.0180189	0.974792	566	592	543	671
Atg4c	autophagy related 4C, cysteine peptidase	-1.35245	4.01e-10	264	388	788	910
Atg4d	autophagy related 4D, cysteine peptidase	-0.332667	0.311582	387.5	367	451	534
Atg5	autophagy related 5	-0.0495097	0.919167	545	658	536	757
Atg7	autophagy related 7	-0.623535	0.0321072	279	364	504	501
Atg9a	autophagy related 9A	-0.103145	0.811748	1238	1188	1301	1379
Atg9b	autophagy related 9B	0.440698	0.803733	85	21	61	17
Atic	5-aminoimidazole-4-carboxamide ribonucleotide formyltransferase/IMP cyclohydrolase	-0.363701	0.0159612	1660	1930	2058.5	2728
Atl1	atlastin GTPase 1	0.129893	0.927167	47	59	52	46
Atl2	atlastin GTPase 2	0.411518	0.189045	694	588	443	564
Atl3	atlastin GTPase 3	0.161752	0.74119	835	1209	945	894
Atm	ataxia telangiectasia mutated	0.441232	0.0142088	986	1146	691	938
Atmin	ATM interactor	0.176286	0.678181	314	324	261	324
Atn1	atrophin 1	-0.579157	0.0112896	686	884	1177	1206
Atoh8	atonal bHLH transcription factor 8	0.973044	0.264195	55	45	20	34
Atox1	antioxidant 1 copper chaperone	0.0534365	0.887055	1500	1793	1347	1956
Atp10a	ATPase, class V, type 10A	-0.307342	0.598621	455	422	623	471
Atp11a	ATPase, class VI, type 11A	-0.525436	0.12752	1236	1484	2190.5	1728
Atp12a	ATPase, H+/K+ transporting, nongastric, alpha polypeptide	3.82772	0.0978373	35	1	0	3
Atp13a1	ATPase type 13A1	-0.373696	0.383584	1005	1274	1671	1272
Atp13a2	ATPase type 13A2	-0.457793	0.246061	966	734	1245	1155
Atp13a3	ATPase type 13A3	0.130267	0.944823	35	62	53	34
Atp13a4	ATPase type 13A4	-1.12772	0.549233	15	5	38	4
Atp1a1	ATPase, Na+/K+ transporting, alpha 1 polypeptide	-0.181206	0.760036	4573	9738	7693	8575
Atp1a2	ATPase, Na+/K+ transporting, alpha 2 polypeptide	2.10255	0.0164287	2578.5	749.5	381.5	452
Atp1a3	ATPase, Na+/K+ transporting, alpha 3 polypeptide	0.168388	0.952311	593	4315	2016	2227
Atp1a4	ATPase, Na+/K+ transporting, alpha 4 polypeptide	-1.39179	0.519476	7.5	3.5	12.5	22
Atp1b1	ATPase, Na+/K+ transporting, beta 1 polypeptide	1.36705	0.00100235	2429.5	6832.5	1343	2329.5
Atp1b2	ATPase, Na+/K+ transporting, beta 2 polypeptide	1.83277	0.000359399	873	353	133	244
Atp1b3	ATPase, Na+/K+ transporting, beta 3 polypeptide	-0.243237	0.320818	3350	4861	4349.5	5624.5
Atp1b4	ATPase, (Na+)/K+ transporting, beta 4 polypeptide	2.23156	0.0486088	42	16	7	6
Atp2a1	ATPase, Ca++ transporting, cardiac muscle, fast twitch 1	2.57785	0.00200122	42889	10973	4876.5	4737
Atp2a2	ATPase, Ca++ transporting, cardiac muscle, slow twitch 2	-0.18419	0.593632	4126	4053	4745	4769
Atp2a3	ATPase, Ca++ transporting, ubiquitous	0.0594865	0.893015	613	650	539	721
Atp2b1	ATPase, Ca++ transporting, plasma membrane 1	-0.201815	0.604629	1704	2677	2473	2617
Atp2b3	ATPase, Ca++ transporting, plasma membrane 3	2.30438	0.139663	49	11	2	12
Atp2b4	ATPase, Ca++ transporting, plasma membrane 4	-0.81324	0.319334	327	415	940	298
Atp2c1	ATPase, Ca++-sequestering	-0.0405515	0.917779	1315	1532	1256	1791
Atp2c2	ATPase, Ca++ transporting, type 2C, member 2	0.557868	0.887055	8	1	6	0
Atp4a	ATPase, H+/K+ exchanging, gastric, alpha polypeptide	0.874893	NA	2	3	0	3
Atp5a1	ATP synthase, H+ transporting, mitochondrial F1 complex, alpha subunit 1	0.361585	0.0112063	8811	9371	6265	8463
Atp5b	ATP synthase, H+ transporting mitochondrial F1 complex, beta subunit	0.0665685	0.766584	12814	14679	11658	15572
Atp5c1	ATP synthase, H+ transporting, mitochondrial F1 complex, gamma polypeptide 1	0.358942	0.0967027	3137	3216	2022	3191
Atp5d	ATP synthase, H+ transporting, mitochondrial F1 complex, delta subunit	-0.280185	0.160448	2079	2096	2302	2968
Atp5e	ATP synthase, H+ transporting, mitochondrial F1 complex, epsilon subunit	0.263605	0.449051	3485	3275	2147	3847
Atp5f1	-	0.212013	0.340508	3003	3544	2356	3544
Atp5g1	ATP synthase, H+ transporting, mitochondrial F0 complex, subunit C1 (subunit 9)	0.188656	0.550528	1371	1341	990	1512
Atp5g2	ATP synthase, H+ transporting, mitochondrial F0 complex, subunit C2 (subunit 9)	0.254336	0.373473	4575	4315	3030	4846
Atp5g3	ATP synthase, H+ transporting, mitochondrial F0 complex, subunit C3 (subunit 9)	0.147054	0.680268	2894	2969	2106	3483
Atp5h	ATP synthase, H+ transporting, mitochondrial F0 complex, subunit D	-0.0187044	0.971105	2837	2879	2469	3596
ATP5I	-	0.430171	0.0644032	1141	1081	717	1010
Atp5j	ATP synthase, H+ transporting, mitochondrial F0 complex, subunit F	0.241941	0.340399	1935.33	2287.33	1485.42	2242
Atp5j2	ATP synthase, H+ transporting, mitochondrial F0 complex, subunit F2	0.257606	0.386081	3435	3181	2286	3555
Atp5l	ATP synthase, H+ transporting, mitochondrial F0 complex, subunit G	0.0734126	0.875428	3633	3723	2703.5	4699.5
Atp5o	ATP synthase, H+ transporting, mitochondrial F1 complex, O subunit	0.271583	0.350496	3058	2834	1993	3165
Atp5s	-	0.112995	0.914208	114	87	76	121
ATP5SL	-	0.211779	0.510373	680	762	505	800
Atp6ap1	ATPase, H+ transporting, lysosomal accessory protein 1	-0.205566	0.26606	3868	4843	4339	6078
Atp6ap2	ATPase, H+ transporting, lysosomal accessory protein 2	-0.565644	0.0427562	1064	1851	1954	2436
Atp6v0a1	ATPase, H+ transporting, lysosomal V0 subunit A1	-0.514622	0.000803882	1358.5	1630.5	1949.17	2455.17
Atp6v0a2	ATPase, H+ transporting, lysosomal V0 subunit A2	-0.0457042	0.945504	330	492	375	497
Atp6v0a4	ATPase, H+ transporting, lysosomal V0 subunit A4	1.25002	0.299277	19	16	9	6
Atp6v0b	ATPase, H+ transporting, lysosomal V0 subunit B	-0.979436	0.00125382	1436	1781	2090	4687
Atp6v0c	ATPase, H+ transporting, lysosomal V0 subunit C	-0.531172	0.0375445	6852	10178	9381.5	16342
Atp6v0d1	ATPase, H+ transporting, lysosomal V0 subunit D1	-0.1072	0.73539	3756	4796	3755	5857
Atp6v0d2	ATPase, H+ transporting, lysosomal V0 subunit D2	-0.384971	0.875428	187	1212	447	1453
ATP6V0E1	-	-0.246077	0.478364	2216	2986	2304	4183
Atp6v0e2	ATPase, H+ transporting, lysosomal V0 subunit E2	0.544448	0.184311	191	176	111	152
Atp6v1a	ATPase, H+ transporting, lysosomal V1 subunit A	-0.817309	4.56e-05	2440	3611	4293	6785
Atp6v1b1	ATPase, H+ transporting, lysosomal V1 subunit B1	0.274735	NA	2	10	8.5	1
Atp6v1b2	ATPase, H+ transporting, lysosomal V1 subunit B2	-1.07817	3.37e-05	3445	5770	7188	13123
Atp6v1c1	ATPase, H+ transporting, lysosomal V1 subunit C1	-0.417231	0.142735	1214	1687	1463	2600
Atp6v1c2	ATPase, H+ transporting, lysosomal V1 subunit C2	0.256758	0.897086	31	13	18	21
Atp6v1d	ATPase, H+ transporting, lysosomal V1 subunit D	-0.216343	0.578573	1819	2253	1725	3278
Atp6v1e1	ATPase, H+ transporting, lysosomal V1 subunit E1	-0.571214	0.0641667	1698	2200	2009	4137
Atp6v1e2	ATPase, H+ transporting, lysosomal V1 subunit E2	0.379985	0.879026	13	11	5	15
Atp6v1f	ATPase, H+ transporting, lysosomal V1 subunit F	-0.445536	0.0798688	1311	1545	1480	2622
Atp6v1g1	ATPase, H+ transporting, lysosomal V1 subunit G1	-0.356226	0.143517	4266	4454	4368	7431
Atp6v1h	ATPase, H+ transporting, lysosomal V1 subunit H	-0.30436	0.312421	1028	1617	1398.5	1963
Atp7a	ATPase, Cu++ transporting, alpha polypeptide	0.0100426	0.992113	471	726	641	545
Atp7b	ATPase, Cu++ transporting, beta polypeptide	0.825038	NA	8	2	3	3
Atp8b1	ATPase, class I, type 8B, member 1	-0.0963083	0.861478	415	467	483	478
Atp8b2	ATPase, class I, type 8B, member 2	-0.167229	0.684632	1714	2634.5	2418.5	2512
Atp9b	ATPase, class II, type 9B	-0.0424195	0.920685	831	923	848	1015
Atpaf1	ATP synthase mitochondrial F1 complex assembly factor 1	-0.0232148	0.979238	175.5	191	143	249.5
Atpaf2	ATP synthase mitochondrial F1 complex assembly factor 2	0.351205	0.37318	292	320	226	269
Atpif1	ATPase inhibitory factor 1	-0.582619	0.000274898	1833	2020	2420	3615
Atraid	all-trans retinoic acid induced differentiation factor	0.481065	0.021955	603	703.5	425	543
Atrip	ATR interacting protein	0.240374	0.665761	172.5	179	127.5	181.5
Atrn	attractin	-0.239533	0.23604	1480	1716	1783	2098
Atxn1	ataxin 1	-0.0658894	0.963943	131	128	160	112.09
Atxn10	ataxin 10	-0.0977575	0.749682	1652	2207	1866	2382
Atxn2l	ataxin 2-like	-0.55115	0.011948	1104	1317	1789	1822
Atxn3	ataxin 3	-0.0724692	0.906432	354	389	386	415
Atxn7l3b	ataxin 7-like 3B	0.12942	0.642809	1063	1225	931	1237
Auh	AU RNA binding protein/enoyl-coenzyme A hydratase	0.0255195	0.973679	242	273	211.5	316
Aup1	ancient ubiquitous protein 1	-0.285549	0.182275	1450	1673	1588	2388
Aurka	aurora kinase A	-0.489925	0.123746	178	213	242	327
Aurkaip1	aurora kinase A interacting protein 1	0.148508	0.72057	953	1186	744	1283
Aurkb	aurora kinase B	0.0865338	0.919167	223	430	268	359
Aurkc	aurora kinase C	0.0940991	0.945343	51	48	49	46
Aven	apoptosis, caspase activation inhibitor	0.28717	0.596968	148	145.5	107	143.5
Avil	advillin	-0.059723	0.973662	48	32	41	46
Avpi1	arginine vasopressin-induced 1	-0.554358	0.0424691	703	613	936	1067
Avpr1a	arginine vasopressin receptor 1A	0.556081	0.461523	160	180	73	175
Avpr2	arginine vasopressin receptor 2	-1.10751	NA	3	4	9	6
Awat1	acyl-CoA wax alcohol acyltransferase 1	4.674	0.0471749	6	3	0	0
Awat2	acyl-CoA wax alcohol acyltransferase 2	0.788994	0.618625	11	10	3	10
Axin2	axin 2	0.589416	0.45995	75	69	51	47
Axl	AXL receptor tyrosine kinase	0.625342	0.06208	4018	7800	3738	3939
Azi2	5-azacytidine induced gene 2	-0.239548	0.383532	570	734	720	860
Azin1	antizyme inhibitor 1	-0.32713	0.117882	1391	1857	1788	2419
Azin2	antizyme inhibitor 2	0.0567603	0.978452	26	27	27	25
B2m	beta-2 microglobulin	-0.116517	0.78044	47084	75881	55457	82019
B3galnt1	UDP-GalNAc:betaGlcNAc beta 1,3-galactosaminyltransferase, polypeptide 1	-0.0658753	0.86493	1227	1501	1381	1541
B3galnt2	UDP-GalNAc:betaGlcNAc beta 1,3-galactosaminyltransferase, polypeptide 2	0.139702	0.740121	619.5	598.5	457	705.5
B3galt1	UDP-Gal:betaGlcNAc beta 1,3-galactosyltransferase, polypeptide 1	-0.124676	NA	7	5	1	14
B3galt4	UDP-Gal:betaGlcNAc beta 1,3-galactosyltransferase, polypeptide 4	-0.0450674	0.974653	63	62	46	91
B3galt5	UDP-Gal:betaGlcNAc beta 1,3-galactosyltransferase, polypeptide 5	-1.49473	NA	2	4	1	18
B3galt6	UDP-Gal:betaGal beta 1,3-galactosyltransferase, polypeptide 6	0.309617	0.597399	140.5	206	136.5	148
B3gat3	beta-1,3-glucuronyltransferase 3 (glucuronosyltransferase I)	-0.274113	0.228691	897	1052	985	1474
B3GNT1	-	0.226707	0.589789	359	360	301	332
B3gnt2	UDP-GlcNAc:betaGal beta-1,3-N-acetylglucosaminyltransferase 2	-0.233588	0.522684	665	631	743	830
B3gnt5	UDP-GlcNAc:betaGal beta-1,3-N-acetylglucosaminyltransferase 5	-0.8726	0.538713	24	12	45	21
B3gnt7	UDP-GlcNAc:betaGal beta-1,3-N-acetylglucosaminyltransferase 7	0.228422	0.78386	182	210	104	255
B3gnt8	UDP-GlcNAc:betaGal beta-1,3-N-acetylglucosaminyltransferase 8	0.937033	0.565416	33	15	19	6
B3gntl1	UDP-GlcNAc:betaGal beta-1,3-N-acetylglucosaminyltransferase-like 1	0.0368979	0.979249	56	68	54	71
B4galnt1	beta-1,4-N-acetyl-galactosaminyl transferase 1	-0.571667	0.155449	127	139	154.5	262.5
B4galnt3	beta-1,4-N-acetyl-galactosaminyl transferase 3	2.04539	NA	3	1	1	0
B4galnt4	beta-1,4-N-acetyl-galactosaminyl transferase 4	0.00386709	0.999122	24	6	23	7
B4galt1	UDP-Gal:betaGlcNAc beta 1,4- galactosyltransferase, polypeptide 1	0.145511	0.630657	1418	1932	1383	1726
B4galt2	UDP-Gal:betaGlcNAc beta 1,4- galactosyltransferase, polypeptide 2	0.222928	0.548166	354	376	295	351
B4galt3	UDP-Gal:betaGlcNAc beta 1,4-galactosyltransferase, polypeptide 3	-0.44066	0.101266	275	328	377	467
B4galt4	UDP-Gal:betaGlcNAc beta 1,4-galactosyltransferase, polypeptide 4	0.980691	0.00727635	279	263	101	191
B4galt5	UDP-Gal:betaGlcNAc beta 1,4-galactosyltransferase, polypeptide 5	-0.768168	2.53e-07	1033	1295	1708	2405
B4galt6	UDP-Gal:betaGlcNAc beta 1,4-galactosyltransferase, polypeptide 6	-0.636414	0.00293909	747	728	1118.5	1246.5
B4galt7	xylosylprotein beta1,4-galactosyltransferase, polypeptide 7 (galactosyltransferase I)	0.391604	0.201355	503	477	355	419
B9d1	B9 protein domain 1	0.548386	0.0798427	234	250	142	203
B9d2	B9 protein domain 2	-0.00218056	0.998434	136	151	133	164.5
Baalc	brain and acute leukemia, cytoplasmic	-0.0741208	0.979109	45	20	50	18
Babam1	BRISC and BRCA1 A complex member 1	-0.289455	0.213942	612	734	697	1015
Bace1	beta-site APP cleaving enzyme 1	0.446444	0.21151	340	332	240	269
Bace2	beta-site APP-cleaving enzyme 2	0.771316	0.0171811	416	344	203	263
Bach1	BTB and CNC homology 1, basic leucine zipper transcription factor 1	-1.02442	9.14e-06	475.5	594.5	1125.67	1077.83
Bad	BCL2-associated agonist of cell death	-0.192743	0.55897	512	567	530	755
Bag1	BCL2-associated athanogene 1	0.0598811	0.859033	1418	1757	1343	1809
Bag2	BCL2-associated athanogene 2	-0.0538416	0.949234	213	232	243	227
Bag3	BCL2-associated athanogene 3	-0.579793	0.00599162	538	535	703	971
Bag4	BCL2-associated athanogene 4	0.209596	0.777464	145.5	252.5	144.5	209.5
Bag5	BCL2-associated athanogene 5	0.17199	0.671021	482	581	372	617
Bag6	BCL2-associated athanogene 6	-0.491888	0.01629	1316.5	1492	1957	2081
BAI1	-	0.122987	0.96997	15	12	11	15
Baiap2	brain-specific angiogenesis inhibitor 1-associated protein 2	-0.664136	0.030251	635	697.17	1152	978.5
Baiap2l1	BAI1-associated protein 2-like 1	-0.247455	0.802573	46	65	74	58
Baiap2l2	BAI1-associated protein 2-like 2	-0.551488	0.514129	37	31	41	64
Bak1	BCL2-antagonist/killer 1	-0.499241	0.0238857	876	1281	1366	1763
Bambi	BMP and activin membrane-bound inhibitor	0.0892714	0.954722	158	77	139	86
Banf1	BAF nuclear assembly factor 1	0.0882855	0.807505	1578	1653.5	1276	1909
Bank1	B cell scaffold protein with ankyrin repeats 1	0.749834	0.60513	14	39	13	19
Banp	BTG3 associated nuclear protein	-0.113166	0.893015	209	328	205	405
Bap1	Brca1 associated protein 1	-0.136274	0.593704	1236	1395	1300	1696
Bard1	BRCA1 associated RING domain 1	-0.117038	0.938472	46	106	69	99
Basp1	brain abundant, membrane attached signal protein 1	-0.584836	0.312842	282	499	691	453
Batf	basic leucine zipper transcription factor, ATF-like	-1.13102	0.00940697	93	100	145	306
Batf3	basic leucine zipper transcription factor, ATF-like 3	-0.0848065	0.963943	50	72	35	104
Bax	BCL2-associated X protein	-0.894319	2.42e-06	614	667	980	1516
Baz1a	bromodomain adjacent to zinc finger domain 1A	-0.413953	0.0582954	531	636	656	963
Baz1b	bromodomain adjacent to zinc finger domain, 1B	-0.0945943	0.761126	1487	1958	1649	2141
Baz2a	bromodomain adjacent to zinc finger domain, 2A	-0.507143	0.108846	646	717	1038	922
Baz2b	bromodomain adjacent to zinc finger domain, 2B	0.0846528	0.86918	481	572.5	502	510.5
Bbc3	BCL2 binding component 3	-0.774325	0.333521	37	65	90	85
Bbox1	butyrobetaine (gamma), 2-oxoglutarate dioxygenase 1 (gamma-butyrobetaine hydroxylase)	-0.667036	0.843633	7	1	9	4
Bbs1	Bardet-Biedl syndrome 1 (human)	0.580495	0.0831098	215	243	139	178
Bbs10	Bardet-Biedl syndrome 10 (human)	0.731552	0.155744	121	110	59	87
Bbs2	Bardet-Biedl syndrome 2 (human)	0.428438	0.143316	282	355	211	278
Bbs4	Bardet-Biedl syndrome 4 (human)	0.0887556	0.875428	242.5	307	231	302
Bbs5	Bardet-Biedl syndrome 5 (human)	0.394308	0.585461	83	105	67	80
Bbs7	Bardet-Biedl syndrome 7 (human)	-0.0210483	0.978305	250	303	252	328
Bbx	bobby sox HMG box containing	-0.0800042	0.939707	87	116	109	109
Bcam	basal cell adhesion molecule	1.0279	0.00594288	1157	756	507	462
Bcap29	B cell receptor associated protein 29	-0.29786	0.367302	434	566	494	789
Bcap31	B cell receptor associated protein 31	-0.114095	0.766307	2391	3098.5	2321	3904.25
Bcar1	breast cancer anti-estrogen resistance 1	-0.351093	0.424347	474	454	638	566
Bcar3	breast cancer anti-estrogen resistance 3	0.381616	0.54625	194	422	231	242
Bcas1	breast carcinoma amplified sequence 1	1.57347	NA	1	2	1	0
Bcas2	breast carcinoma amplified sequence 2	0.25233	0.563117	558	641	374	690
Bcas3	breast carcinoma amplified sequence 3	-0.311092	0.264221	388	474	469	639
Bcat1	branched chain aminotransferase 1, cytosolic	-0.510371	0.117882	2500	4567.5	4883.5	5238.5
Bcat2	branched chain aminotransferase 2, mitochondrial	-0.0233511	0.971665	849	1020	745	1249
Bccip	BRCA2 and CDKN1A interacting protein	0.167852	0.695969	515	570.5	375.5	641
Bcdin3d	BCDIN3 domain containing	-0.42248	0.631145	44	39	46	71
Bche	butyrylcholinesterase	0.559204	0.864994	19	9	2	20
Bckdha	branched chain ketoacid dehydrogenase E1, alpha polypeptide	0.522981	0.0350629	887	938	605	705
Bckdhb	branched chain ketoacid dehydrogenase E1, beta polypeptide	0.298449	0.483843	538	470	323	547
Bckdk	branched chain ketoacid dehydrogenase kinase	0.0902902	0.811748	1062.5	1061	896	1180.5
Bcl10	B cell leukemia/lymphoma 10	-0.220721	0.368297	801	904	873	1191
Bcl11a	B cell CLL/lymphoma 11A (zinc finger protein)	-0.22387	0.897975	30	17	25	33
Bcl11b	B cell leukemia/lymphoma 11B	-0.0340109	0.983853	48	48	37	67
Bcl2	B cell leukemia/lymphoma 2	-0.615792	0.64777	23	25	42	32
BCL2A1	-	-0.315486	0.583625	1054	2115	1349	2772
Bcl2l1	BCL2-like 1	-0.827071	4.85e-07	536	685	983	1249
Bcl2l11	BCL2-like 11 (apoptosis facilitator)	-0.139671	0.736187	307	348	310	441
Bcl2l12	BCL2-like 12 (proline rich)	-0.370556	0.24239	243	299.5	319.5	404
Bcl2l13	BCL2-like 13 (apoptosis facilitator)	0.111257	0.880131	150	202	157	176
Bcl2l14	BCL2-like 14 (apoptosis facilitator)	0.0832487	0.971665	27	86	32	79
Bcl2l15	BCLl2-like 15	2.42987	NA	4	1	0	1
Bcl2l2	BCL2-like 2	0.083395	0.875862	555	713	607	608.5
Bcl3	B cell leukemia/lymphoma 3	-1.07595	0.00011057	307	272	629	624
Bcl6	B cell leukemia/lymphoma 6	0.0105552	0.989026	341	433	329	468
Bcl6b	B cell CLL/lymphoma 6, member B	0.30122	0.418327	321	355	270	293
Bcl7b	B cell CLL/lymphoma 7B	-0.328138	0.351607	348	460	397	664
Bcl7c	B cell CLL/lymphoma 7C	-0.100066	0.799515	396	440.5	406	522.5
Bcl9l	B cell CLL/lymphoma 9-like	-0.0393047	0.953967	737	847	849	803
Bclaf1	BCL2-associated transcription factor 1	0.157219	0.625486	1547	1914	1525	1641.5
Bco1	beta-carotene oxygenase 1	-0.559335	NA	5	5	8	7
Bco2	beta-carotene oxygenase 2	-0.862526	0.14137	68	57	124	108
Bcor	BCL6 interacting corepressor	-0.106016	0.822354	381	488	457	498
Bcorl1	BCL6 co-repressor-like 1	0.0139819	0.989514	177	307	234	250
Bcs1l	BCS1-like (yeast)	-0.0460334	0.964784	124	174	140	176
Bdh1	3-hydroxybutyrate dehydrogenase, type 1	-0.69424	0.0332889	150	144	227	265
Bdh2	3-hydroxybutyrate dehydrogenase, type 2	0.673376	0.0814509	349	307	155	283
Bdkrb1	bradykinin receptor, beta 1	-2.22275	0.000912258	12	14	53	73
Bdkrb2	bradykinin receptor, beta 2	0.906725	0.133698	267	168	137	100
Bdp1	B double prime 1, subunit of RNA polymerase III transcription initiation factor IIIB	-0.623434	0.537135	25	29	42	43
Becn1	beclin 1, autophagy related	-0.0297503	0.949477	1045	1374.5	1077	1476
Begain	brain-enriched guanylate kinase-associated	0.135735	0.930603	43	39	33	45
Bend5	BEN domain containing 5	-0.0141877	0.995423	31	16	23	27
Bend6	BEN domain containing 6	0.0952879	0.90909	154	251	177	209
Bend7	BEN domain containing 7	1.527	NA	4	15	1	6
Best3	bestrophin 3	2.58325	NA	15	3	3	0
Bet1	Bet1 golgi vesicular membrane trafficking protein	0.235225	0.329817	1029	1225	824	1166
Bet1l	Bet1 golgi vesicular membrane trafficking protein like	0.494306	0.0120537	749	923	533	693
Bex1	brain expressed X-linked 1	1.16785	0.433212	19	9	7	6
Bex2	brain expressed X-linked 2	1.4223	NA	5	5	1	3
Bfar	bifunctional apoptosis regulator	-0.0329711	0.964882	504.5	774.5	606	728.5
Bfsp1	beaded filament structural protein 1, in lens-CP94	-0.102773	0.93115	65	82	83	77
Bfsp2	beaded filament structural protein 2, phakinin	-0.648676	NA	5	0	2	7
Bgn	biglycan	0.457753	0.070657	25246	36784	22839.5	22693
Bhlhb9	basic helix-loop-helix domain containing, class B9	0.155611	0.824623	218	230	153	272
Bhlhe22	basic helix-loop-helix family, member e22	1.41649	0.352788	33	13	10	8
Bhlhe23	basic helix-loop-helix family, member e23	3.09479	0.355732	8	0	1	0
Bhlhe40	basic helix-loop-helix family, member e40	-0.076777	0.866027	1887	2246	2231	2196
Bicc1	BicC family RNA binding protein 1	0.102874	0.808675	555	716	563	649
Bicd1	BICD cargo adaptor 1	0.432073	0.725966	64	52	55	31
Bicd2	BICD cargo adaptor 2	-0.117644	0.761188	1087	1589	1354	1610
Bid	BH3 interacting domain death agonist	-0.683339	0.0112228	246	332	379	587
Bik	BCL2-interacting killer	-0.31078	0.818497	42	30	28	69
Bin1	bridging integrator 1	0.996465	0.000703402	2365	1698	835	1338
Bin2	bridging integrator 2	-0.784089	0.000912258	405.5	627.5	819.5	997.5
BIN2A	-	0.590438	NA	3	1	0	3
Bin3	bridging integrator 3	0.149214	0.653149	591	753	534	719
Birc2	baculoviral IAP repeat-containing 2	-0.40505	0.354219	736	1357.5	1019.75	1864.75
Birc3	baculoviral IAP repeat-containing 3	-0.845871	0.00393083	268	423.5	488.25	805.25
Birc5	baculoviral IAP repeat-containing 5	-0.481678	0.347847	94	149	151	197
Birc6	baculoviral IAP repeat-containing 6	0.0430592	0.921464	2165.5	2993	2342.5	2778
Bivm	basic, immunoglobulin-like variable motif containing	0.514758	0.120131	330	397	193	342
Blcap	bladder cancer associated protein	0.0625513	0.89992	492	502	415	578
BLES03	-	0.132725	0.700827	611	681	520	704
Blk	B lymphoid kinase	0.247585	0.88363	24.5	26	13	32
Blmh	bleomycin hydrolase	0.278372	0.125987	1178	1367	943	1229
Blnk	B cell linker	0.482966	0.29585	437	867	370	590
Bloc1s1	biogenesis of lysosomal organelles complex-1, subunit 1	-0.188132	0.542316	1051	1128	1007	1601
Bloc1s2	biogenesis of lysosomal organelles complex-1, subunit 2	-0.290331	0.404699	534	827	688	1033
Bloc1s4	biogenesis of lysosomal organelles complex-1, subunit 4, cappuccino	-0.243616	0.62781	197	184	204	266
Bloc1s5	biogenesis of lysosomal organelles complex-1, subunit 5, muted	0.197925	0.643061	355	496	297.5	474.5
Bloc1s6	biogenesis of lysosomal organelles complex-1, subunit 6, pallidin	0.194979	0.689878	305	314	267	289
Blvra	biliverdin reductase A	-0.449946	0.251363	986.5	1685	1303	2515.5
Blvrb	biliverdin reductase B (flavin reductase (NADPH))	-0.957973	4.85e-09	906.5	1192	1705	2529.5
Blzf1	basic leucine zipper nuclear factor 1	0.234793	0.525606	345	433	299	383
Bmf	BCL2 modifying factor	0.298684	0.627085	210	178	127	207
Bmi1	Bmi1 polycomb ring finger oncogene	0.208264	0.677808	191	259	167	236
Bmp1	bone morphogenetic protein 1	-0.25205	0.557589	2704	4201	4329	3890
Bmp15	bone morphogenetic protein 15	1.8261	NA	11	9	2	4
Bmp2	bone morphogenetic protein 2	-0.361838	0.74982	29	36	43	42
Bmp3	bone morphogenetic protein 3	0.796965	0.631246	17	123	43	34
Bmp4	bone morphogenetic protein 4	1.79966	2.34e-05	362.67	216	81.17	94
Bmp5	bone morphogenetic protein 5	2.62177	0.0425886	210	29	6	40
Bmp6	bone morphogenetic protein 6	0.722081	0.660529	23	50	27	16
Bmp7	bone morphogenetic protein 7	0.0593557	0.957134	201	428	221	404
Bmp8a	bone morphogenetic protein 8a	-0.849417	0.812248	8	0	14	0
Bmper	BMP-binding endothelial regulator	-0.0107045	0.994783	199	95	111	212
Bmpr1a	bone morphogenetic protein receptor, type 1A	0.81602	1.43e-05	709	827	416	481
Bmpr1b	bone morphogenetic protein receptor, type 1B	-0.367781	0.884028	25	25	51	10
Bmpr2	bone morphogenetic protein receptor, type II (serine/threonine kinase)	0.0359407	0.964882	567	641	625	569
Bms1	BMS1, ribosome biogenesis factor	-0.0995272	0.786914	596	709	651	789
Bmx	BMX non-receptor tyrosine kinase	1.06178	0.224099	56	42	18	32
Bmyc	brain expressed myelocytomatosis oncogene	0.650207	0.258793	139	109	62	106
Bnc1	basonuclin 1	-0.575424	0.920213	28	6	48	0
Bnc2	basonuclin 2	0.189001	0.720059	253	347	258	278
Bnip1	BCL2/adenovirus E1B interacting protein 1	0.182856	0.701676	304	315	216	358
Bnip2	BCL2/adenovirus E1B interacting protein 2	-0.193673	0.57348	873	1250	1157	1317
Bnip3	BCL2/adenovirus E1B interacting protein 3	-0.371554	0.460286	1641.5	1843	2677	1800
Bnip3l	BCL2/adenovirus E1B interacting protein 3-like	0.119845	0.739229	2804	3339	2217	3724
Bnipl	BCL2/adenovirus E1B 19kD interacting protein like	0.471933	0.915401	46	14	40	1
Bod1	biorientation of chromosomes in cell division 1	0.21509	0.683806	247	245	215	220
Bok	BCL2-related ovarian killer	0.331111	0.696726	261	198	228	138
Bola1	bolA-like 1 (E. coli)	0.33931	0.537611	147	157	114	134
Bola3	bolA-like 3 (E. coli)	-0.0356166	0.969267	176	181	153	230
Bop1	block of proliferation 1	-0.299101	0.201355	536	579	630	790
Bora	bora, aurora kinase A activator	-0.356273	0.584637	80	134.5	107.5	176
Bpgm	2,3-bisphosphoglycerate mutase	0.365319	0.326688	1147	1077	635	1208
Bphl	biphenyl hydrolase-like (serine hydrolase, breast epithelial mucin-associated antigen)	0.385845	0.610337	120	135	65	143
Bpifb1	BPI fold containing family B, member 1	-5.49722	0.011945	0	1	15	33
Bpifc	BPI fold containing family C	-0.187266	0.974721	38	6	47	1
Bpnt1	bisphosphate 3'-nucleotidase 1	0.199064	0.652221	354	521	366	410
Brap	BRCA1 associated protein	-0.390437	0.14137	435	492	594	652
Brca1	breast cancer 1, early onset	-0.265718	0.720409	74	120	116	120
Brca2	breast cancer 2, early onset	0.17483	0.740121	210	246	165	257
Brcc3	BRCA1/BRCA2-containing complex, subunit 3	-0.147503	0.712722	537	785	628	883
Brd1	bromodomain containing 1	-0.331401	0.179574	497	571	647	733
Brd2	bromodomain containing 2	-0.30609	0.136711	2024	2014	2350	2818
Brd3	bromodomain containing 3	0.0169009	0.982105	331	402	365.5	371.5
Brd4	bromodomain containing 4	-0.507677	0.0100357	901	1060	1367	1485
Brd7	bromodomain containing 7	-0.246994	0.300442	801	1057.5	990	1283
Brd8	bromodomain containing 8	-0.120336	0.780033	422	520	504	542
Brd9	bromodomain containing 9	-0.164676	0.630333	477	571	511	708
BRE	-	0.262541	0.509631	771	971	530	1003
Brf1	BRF1, RNA polymerase III transcription initiation factor 90 kDa subunit	-0.105953	0.828505	273	308	264	388
Brf2	BRF2, RNA polymerase III transcription initiation factor 50kDa subunit	-0.13697	0.856585	130	147	127	191
Bri3	brain protein I3	-0.561642	0.00678961	476	582	666	957
Bri3bp	Bri3 binding protein	-0.407745	0.546691	82	132	107	189
Brinp1	bone morphogenic protein/retinoic acid inducible neural specific 1	0.446225	NA	10	1	3	6
Brinp2	bone morphogenic protein/retinoic acid inducible neural-specific 2	0.839395	NA	9	3	4	3
Brinp3	bone morphogenetic protein/retinoic acid inducible neural specific 3	1.24363	0.605802	4	16	6	2
Brix1	BRX1, biogenesis of ribosomes	-0.11761	0.776895	429	486	413	624
Brk1	BRICK1, SCAR/WAVE actin-nucleating complex subunit	0.0936633	0.833356	2511	3309	2078	3649
Brms1	breast cancer metastasis-suppressor 1	-0.382999	0.0488924	942	995	1087	1550
Brms1l	breast cancer metastasis-suppressor 1-like	0.371163	0.143517	478	538.67	343.67	473.33
Brox	BRO1 domain and CAAX motif containing	-0.0187989	0.969596	1122	1345	1108	1480
Brpf1	bromodomain and PHD finger containing, 1	-0.457181	0.256907	361	290	451	473
Brpf3	bromodomain and PHD finger containing, 3	-0.374686	0.46294	114	132	144	186
Brsk1	BR serine/threonine kinase 1	-0.55693	0.386081	81.5	78.5	126.5	113.5
Bscl2	Berardinelli-Seip congenital lipodystrophy 2 (seipin)	0.171655	0.57148	743	828	587.5	868.5
Bsdc1	BSD domain containing 1	0.0448502	0.924982	713	836	696.5	852
Bsg	basigin	-0.259088	0.217381	4697	6315	6124	7374
Bsn	bassoon	0.597768	0.796385	8	17	11	5
Bspry	B-box and SPRY domain containing	-0.531531	0.698515	75	31	113	39
Bst1	bone marrow stromal cell antigen 1	-0.693516	0.00439807	362	549	638	879
Bst2	bone marrow stromal cell antigen 2	-0.640502	0.161717	1177	2534	3132	2549
Btaf1	B-TFIID TATA-box binding protein associated factor 1	-0.157752	0.63302	725	953	865	1057
Btbd1	BTB (POZ) domain containing 1	0.422648	0.0520888	1630	1546	1083	1384
Btbd10	BTB (POZ) domain containing 10	-0.103858	0.8462	318	437	394	433
Btbd16	BTB (POZ) domain containing 16	-0.599817	NA	2	7	5	9
Btbd3	BTB (POZ) domain containing 3	0.477247	0.568827	203	107	116	117
Btbd6	BTB (POZ) domain containing 6	0.373068	0.158532	472	525	342	457
Btbd7	BTB (POZ) domain containing 7	0.0116474	0.9868	375	495	419	462
Btbd9	BTB (POZ) domain containing 9	-0.0161374	0.9882	147	198	185	167
[truncated: 11,752 more rows]
