# Supplementary material for: Biological Evaluation of the Effect of Root Canal Sealers Using a Rat Model
Source: Pharmaceutics. 2022 Sep 24;14(10):2038. doi: 10.3390/pharmaceutics14102038 (PMC9606985; doi:10.3390/pharmaceutics14102038)
Supplement: Supplementary file 1 [file pharmaceutics-14-02038-s001.zip › 20210131Dataset2.xlsx]

## Sheet: Control vs Canals
Dataset 2-1: Differentially upregulated genes of Canals group, as compared to those of control group.
Gene symbol	Gene name	log2 FC	FDR	Control_1 count	Control_2 count	Canals_1 count	Canals_2 count
Myoc	myocilin	3.08549	0.0938058	1526	149	74	107
A2m	alpha-2-macroglobulin	3.06106	9.48e-31	1150	1761	144	147
Cst6	cystatin E/M	3.05997	0.0321574	739	6123	252	425
Guca2b	guanylate cyclase activator 2b (retina)	2.79143	7.99e-05	74	63	8	9
Cryaa	crystallin, alpha A	2.76611	1.31e-05	120	64	8	16
Col8a1	collagen, type VIII, alpha 1	2.71193	2.04e-30	1354	1917	185	238
Cpxm2	carboxypeptidase X 2 (M14 family)	2.67471	7.11e-20	1409	1148	148	199
Tenm3	teneurin transmembrane protein 3	2.64247	0.0263186	114	40	9	13
Smoc2	SPARC related modular calcium binding 2	2.59123	1.24e-10	2168	1114	193	290
Dlk1	delta like non-canonical Notch ligand 1	2.57142	3.79e-05	310	135	29	37
Zim1	zinc finger, imprinted 1	2.52998	0.0150375	135	58	15	14
Fam180a	family with sequence similarity 180, member A	2.44264	2.64e-06	183	241	35	30
TAC3	-	2.39806	0.0418488	36	57	6	9
Col11a1	collagen, type XI, alpha 1	2.35977	1.37e-17	886	1702	180	244
Gdf10	growth differentiation factor 10	2.33681	0.0037016	513	162	59	58
Thbs1	thrombospondin 1	2.27715	1.31e-06	3626	8550	845	1267
NOV	-	2.26991	3.85e-07	1723	3400	396	491
Hs6st2	heparan sulfate 6-O-sulfotransferase 2	2.24458	0.0352696	38	53	9	7
Prss35	protease, serine 35	2.19151	1.62e-21	986	1302	172	257
Clec11a	C-type lectin domain family 11, member a	2.18222	3.53e-13	1005	724	147	183
Gfra1	glial cell line derived neurotrophic factor family receptor alpha 1	2.15819	0.000777175	781.5	278	88	124
Trh	thyrotropin releasing hormone	2.12013	0.0206104	49	87	8	19
Lsamp	limbic system-associated membrane protein	2.07772	0.0533464	103	45	13	18
Ltbp2	latent transforming growth factor beta binding protein 2	2.06265	1.33e-05	319	414	54	98
Lrrc2	leucine rich repeat containing 2	2.05498	0.057056	62	38	9	12
Mmp7	matrix metallopeptidase 7	2.02129	0.0960576	38	245	31	24
Lmod2	leiomodin 2 (cardiac)	1.98813	0.0186856	510	139	68	77
Itga8	integrin alpha 8	1.95802	1.38e-07	351	724	111	118
Tnmd	tenomodulin	1.95179	0.00110682	225	141	38	44
Cilp	cartilage intermediate layer protein, nucleotide pyrophosphohydrolase	1.922	0.0103215	940	331	133	164
Stmn2	stathmin-like 2	1.91795	5.38e-06	486	469	99	117
Sfrp5	secreted frizzled-related sequence protein 5	1.88598	0.0780904	64	353	40	52
Fmod	fibromodulin	1.8658	0.00028621	256	677	91	122
Kif5c	kinesin family member 5C	1.83103	0.0468668	53	51.5	13	12
Wfdc1	WAP four-disulfide core domain 1	1.81341	0.0103215	835	1147	203	277
Dcx	doublecortin	1.80596	0.0680489	86	60	17	19
Tfcp2l1	transcription factor CP2-like 1	1.80561	0.0930841	62	48	13	14
Tpsab1	tryptase alpha/beta 1	1.78132	0.00749129	583	253	82	136
Fxyd6	FXYD domain-containing ion transport regulator 6	1.77638	0.0203018	383	146	48	92
Agt	angiotensinogen (serpin peptidase inhibitor, clade A, member 8)	1.74744	0.0826268	584	312	109	123
Fbn2	fibrillin 2	1.65016	0.0387	393	728	130	170
Slitrk6	SLIT and NTRK-like family, member 6	1.57808	0.0636641	75	175	34	35
Mybpc1	myosin binding protein C, slow-type	1.56901	0.0115787	4182	1403	723	954
Txlnb	taxilin beta	1.56153	0.0735052	827	241	144	178
Sorcs2	sortilin-related VPS10 domain containing receptor 2	1.52893	0.00440405	520	471	128	168
Ptx3	pentraxin related gene	1.52405	0.0156587	125	130	33	43
Fibin	fin bud initiation factor homolog (zebrafish)	1.50597	7.32e-07	457	401	115	145
C1qtnf3	C1q and tumor necrosis factor related protein 3	1.50584	0.000150404	1796	1751	444	636
Nrk	Nik related kinase	1.44953	0.0421215	88	143	33	37.5
Abcb1b	ATP-binding cassette, sub-family B (MDR/TAP), member 1B	1.43782	3.24e-05	279.17	258.5	71.83	99.33
Cdh11	cadherin 11	1.42951	0.000143379	1552	1278	369	547
Tagln	transgelin	1.42847	0.000608702	2648	3955	864	1223
Cand2	cullin-associated and neddylation-dissociated 2 (putative)	1.41124	0.050927	477	200	101	123
Ckmt2	creatine kinase, mitochondrial 2	1.39997	0.0889604	707	281	129	207
Myot	myotilin	1.39841	0.00335752	1840.72	904.69	409.68	502.99
Actg2	actin, gamma 2, smooth muscle, enteric	1.39606	0.00447624	230	204	58	85
Hbegf	heparin-binding EGF-like growth factor	1.38524	0.0773703	159	99	42	43
Ldb3	LIM domain binding 3	1.38068	0.00131418	4890	2474	1108	1370
Ankrd23	ankyrin repeat domain 23	1.34303	0.00819621	2037	950	434	609
Klhl41	kelch-like 41	1.33614	0.0351955	2204	959	483	623
Bmp4	bone morphogenetic protein 4	1.33402	0.0124685	362.67	216	82.5	120
Mstn	myostatin	1.3139	0.0905642	204	142	60	59
Acyp2	acylphosphatase 2, muscle type	1.29738	0.0562512	255	150	74	67
Akap6	A kinase (PRKA) anchor protein 6	1.28566	0.0906188	187	97	49	52
Cxcl14	chemokine (C-X-C motif) ligand 14	1.2785	0.0930841	1080	396	261	271
CYR61	-	1.26328	3.82e-05	1336	1165	407	487
Mt3	metallothionein 3	1.25665	0.00130792	237	163	60	86
Hes1	hes family bHLH transcription factor 1	1.2527	0.0412723	277	193	76	95
Tpsb2	tryptase beta 2	1.25056	0.04368	803	420	170	289
Gpt2	glutamic pyruvate transaminase (alanine aminotransferase) 2	1.24761	0.0568745	229	152	71	66
Ncam1	neural cell adhesion molecule 1	1.23096	0.0890125	434	837	191	265
Eno3	enolase 3, beta muscle	1.21257	0.0319887	16493	6932	3718	5275
Tnnt3	troponin T3, skeletal, fast	1.19998	0.0339855	33416	13753	7875.25	10303
F2r	coagulation factor II (thrombin) receptor	1.17488	1.11e-11	1556	1596	536	657
Ston1	stonin 1	1.17266	0.0124685	181	226	66	88
Eln	elastin	1.15846	2.38e-14	11051	11831	3627	5209
CTGF	-	1.15652	0.0987473	2444	3896	1050	1348
Mest	mesoderm specific transcript	1.15355	0.0609442	269	177	74	101
Apoc1	apolipoprotein C-I	1.14945	0.0198866	210.5	204	71	89
Gria3	glutamate receptor, ionotropic, AMPA3 (alpha 3)	1.14797	0.0269291	177	139	55	68
F3	coagulation factor III	1.13757	0.0103199	1840	1066	466	701
Fmo3	flavin containing monooxygenase 3	1.12822	0.0476221	935	513	221	369
Cryab	crystallin, alpha B	1.10916	0.025078	1377	771	357	522
Enpep	glutamyl aminopeptidase	1.10553	0.0347138	528	309	148	192
RGD1310507	-	1.10208	0.0324669	350	368	123	164
Grem1	gremlin 1, DAN family BMP antagonist	1.09853	0.00536136	155	180	56	78
Tspan18	tetraspanin 18	1.09458	9.25e-05	856	822	284	394.5
Id3	inhibitor of DNA binding 3	1.08582	0.0013375	1420	994	415	578
Fam198b	-	1.07965	1.11e-17	4133	5187	1654	2094
Clic5	chloride intracellular channel 5	1.05988	0.0369984	630	378	185	237
Tpm1	tropomyosin 1, alpha	1.0518	0.00442861	31571	19158	9354	12015
Bgn	biglycan	1.05123	1.12e-06	25246	36784	11096	14219.5
Bhlhe40	basic helix-loop-helix family, member e40	1.04808	3.4e-07	1887	2246	741	964
Apobec2	apolipoprotein B mRNA editing enzyme, catalytic polypeptide 2	1.01925	0.0889604	2502	1285	697	950
Mfap4	microfibrillar-associated protein 4	1.01039	0.00130792	17008	16865	6088	8411
Peg3	paternally expressed 3	1.00369	0.00146444	1772.5	1771.5	680.5	831

## Sheet: Control vs BG
Dataset 2-2: Differentially upregulated genes of BG group, as compared to those of control group.
Gene symbol	Gene name	log2 FC	FDR	Control_1 count	Control_2 count	BG_1 count	BG_2 count
Agtr2	angiotensin II receptor, type 2	5.02231	0.0410276	25	7	1	0
Anks1b	ankyrin repeat and sterile alpha motif domain containing 1B	4.26127	0.0202857	11	29	1	1
Mgat4c	MGAT4 family, member C	4.18434	0.00378335	18	39	2	1
Gabra1	gamma-aminobutyric acid (GABA) A receptor, subunit alpha 1	3.62924	0.0439782	13	25	1	2
Slc19a3	solute carrier family 19, member 3	3.31785	0.000451972	56	53	3	8
Myoc	myocilin	3.22579	0.020462	1526	149	88	100
Nell1	NEL-like 1	3.13025	0.0679342	7	30	2	2
Col8a1	collagen, type VIII, alpha 1	2.99236	2.71e-37	1354	1917	202	198
Dpp6	dipeptidylpeptidase 6	2.97542	5.44e-11	159	166.5	17	24
Fam163a	family with sequence similarity 163, member A	2.90767	0.0413647	13	34	3	3
Retnlg	resistin like gamma	2.70731	2.64e-12	234	259	29	46
Slc15a2	solute carrier family 15 (H+/peptide transporter), member 2	2.6799	5.6e-11	187	390	40	47
Plcxd3	phosphatidylinositol-specific phospholipase C, X domain containing 3	2.62951	0.010893	29	41	6	5
Lect2	leukocyte cell-derived chemotaxin 2	2.6191	0.0989517	7	32	3	3
Nrk	Nik related kinase	2.60841	1.46e-06	88	143	16.5	21
Chrdl1	chordin-like 1	2.60364	2.93e-11	1204	1638	225	231
Kcnt2	potassium channel, subfamily T, member 2	2.58303	0.000206696	34	52	7	7
Fbn2	fibrillin 2	2.58049	1.05e-05	393	728	81	101
Mst1	macrophage stimulating 1 (hepatocyte growth factor-like)	2.52621	0.0348916	38	37	5	8
NOV	-	2.4955	2.16e-09	1723	3400	433	441
F2rl3	coagulation factor II (thrombin) receptor-like 3	2.49481	0.0046644	61	48	12	7
BTN3A2	-	2.48743	0.0937401	7.25	27.58	2.5	4
Cbln2	cerebellin 2 precursor protein	2.47131	0.0806316	12	98	5	14
Fmo3	flavin containing monooxygenase 3	2.4377	7.59e-10	935	513	120	151
Gucy1a2	guanylate cyclase 1, soluble, alpha 2	2.43135	0.0274048	29	19	3	6
Slitrk6	SLIT and NTRK-like family, member 6	2.42869	0.000107704	75	175	18	27
Fmo2	flavin containing monooxygenase 2	2.38965	0.00392121	282	81	21	52
Spock2	sparc/osteonectin, cwcv and kazal-like domains proteoglycan 2	2.347	0.00473038	128	74	19	21
Aox3	aldehyde oxidase 3	2.33844	0.000476903	507	301	62.5	101.25
Fmo1	flavin containing monooxygenase 1	2.3294	0.000948083	419	165	60	58
Adipoq	adiponectin, C1Q and collagen domain containing	2.32014	0.0991837	1395	1069	219	276
Lep	leptin	2.3063	0.0623225	57	48	11	10
Eln	elastin	2.28383	6.35e-58	11051	11831	2184	2453
MGC109340	-	2.24824	0.0225826	59	51	11	12
Thbs1	thrombospondin 1	2.22836	5.34e-07	3626	8550	1172	1322
Ms4a2	membrane-spanning 4-domains, subfamily A, member 2	2.21591	0.000276022	312	139	44	55
RGD1310507	-	2.20783	3.9e-09	350	368	68	86
Necab1	N-terminal EF-hand calcium binding protein 1	2.19592	0.0826399	21	63	4	14
Pi15	peptidase inhibitor 15	2.17791	9.99e-06	186	406	44	84
LOC690918	-	2.16993	0.00709564	36	85	11	15
Plin1	perilipin 1	2.14673	0.054631	178	132	33	37
Mum1l1	-	2.13923	0.0363074	39	37	9	8
Cpa3	carboxypeptidase A3, mast cell	2.13882	0.00862794	3432	2166	568	716
Cdo1	cysteine dioxygenase 1, cytosolic	2.13604	0.053285	1068	586	181	199
Esrrg	estrogen-related receptor gamma	2.13184	0.0110793	39	56	12	9
Fmod	fibromodulin	2.12479	2.6e-06	256	677	102	102
G0s2	G0/G1 switch gene 2	2.12339	2.6e-06	270	468	65	101
Adh7	alcohol dehydrogenase 7 (class IV), mu or sigma polypeptide	2.09646	8.39e-07	136	141	30	34
Pcdh20	protocadherin 20	2.09565	1.98e-13	682	1255	220	217
RGD1565323	-	2.09537	0.0458693	101.33	28	15	16
Ccdc80	coiled-coil domain containing 80	2.09475	9.68e-15	48402	94066.5	14855	17407
MCPT1L1	-	2.09292	0.00485295	7478	4333	1335	1455
Cpxm2	carboxypeptidase X 2 (M14 family)	2.09284	6.84e-13	1409	1148	263	337
Vsnl1	visinin-like 1	2.08659	0.0292362	22	75	8	14
Rprm	reprimo, TP53 dependent G2 arrest mediator candidate	2.07926	0.0466703	18	48	7	8
P2rx2	purinergic receptor P2X, ligand-gated ion channel, 2	2.07018	0.0851044	13	39	4	8
Cacnb4	calcium channel, voltage-dependent, beta 4 subunit	2.06833	0.0204648	36	56	14	7
Wfdc1	WAP four-disulfide core domain 1	2.02551	0.000463619	835	1147	231	244
Esm1	endothelial cell-specific molecule 1	2.01341	0.00381287	60	151	25	25
Gsn	gelsolin	1.9995	8.86e-18	84840	72787	18451	20773
Calml4	calmodulin-like 4	1.99625	2.34e-06	167	266	47	59
Angptl1	angiopoietin-like 1	1.98227	3.7e-07	1831.5	991.5	337	386
Map7d3	-	1.98193	0.000325447	80	95	16	28
Lox	lysyl oxidase	1.95829	2.76e-05	1949	3845	674	766
Alox15	arachidonate 15-lipoxygenase	1.94949	0.00277625	356	813	136	155
Htr1b	5-hydroxytryptamine (serotonin) receptor 1B	1.94545	0.0163077	41	146	23	23
Ace	angiotensin I converting enzyme (peptidyl-dipeptidase A) 1	1.93802	1.84e-24	2016	3142	622	688
Nox4	NADPH oxidase 4	1.93712	6.53e-07	238	452	93	80
Esr1	estrogen receptor 1 (alpha)	1.9282	0.0325349	47	177	25	31
Cmah	cytidine monophospho-N-acetylneuraminic acid hydroxylase	1.92573	6.98e-06	394	696	125	154
Ntrk2	neurotrophic tyrosine kinase, receptor, type 2	1.92329	5.21e-05	1721	1125	347	408
Cadm3	cell adhesion molecule 3	1.91533	3e-07	1587	2962	540	628
Dnase1l3	deoxyribonuclease 1-like 3	1.91165	0.00143165	286	797	109	169
Abcc9	ATP-binding cassette, sub-family C (CFTR/MRP), member 9	1.90733	1.1e-10	1896	2163	484	584
Prkg1	protein kinase, cGMP-dependent, type I	1.8964	0.0237361	46	43	8	15.5
Itgbl1	integrin, beta-like 1	1.89239	1.78e-14	5228	8817	1711	1964
Tmem45b	transmembrane protein 45b	1.88659	8.3e-07	299	232	53	92
Apln	apelin	1.88561	0.000491	92	252	43	46
Tpsab1	tryptase alpha/beta 1	1.88483	0.000683881	583	253	104	127
Dpp4	dipeptidylpeptidase 4	1.8733	4.36e-05	2905	8007	1337	1508
Cma1	chymase 1, mast cell	1.8562	2.78e-05	3066	1581.5	567	740
Ptgdr	prostaglandin D receptor	1.85259	0.0654637	26.75	39	7	11
Rprml	reprimo-like	1.8514	0.0566241	52	29	7	16
Pcdhb2	protocadherin beta 2	1.85089	0.0700565	28	60	16	7
Pdgfd	platelet-derived growth factor, D polypeptide	1.84699	1.74e-11	319	472	107	107
Lmod1	leiomodin 1 (smooth muscle)	1.83177	0.00202754	350	160	65	81
Itga11	integrin alpha 11	1.83159	1.19e-13	1436	2574.5	477	620.5
Epha3	Eph receptor A3	1.82935	0.00237472	199	776	134	124
Prnd	prion like protein doppel	1.82801	0.0581	24	57	10	12
Pcolce2	procollagen C-endopeptidase enhancer 2	1.82185	7.34e-29	1443	1888	445	477
Arhgap8	Rho GTPase activating protein 8	1.82017	0.0966618	21	29	5	9
Pi16	peptidase inhibitor 16	1.8025	2.57e-10	4110	8299	1588	1848
Mab21l1	mab-21-like 1	1.78977	0.00813837	49	163	31	27
Cidec	cell death-inducing DFFA-like effector c	1.78621	0.0198679	461	212	95	103
Tmod2	tropomodulin 2	1.78592	0.000155495	200	302	82	58
Col14a1	collagen, type XIV, alpha 1	1.78579	5.26e-15	21936.7	34885.5	7576.5	8448.5
PTGDRL	-	1.7773	0.0624054	29.75	43	8	13
Galntl5	UDP-N-acetyl-alpha-D-galactosamine:polypeptide N-acetylgalactosaminyltransferase-like 5	1.77616	0.0845	23	47	7	13
Retn	resistin	1.77484	0.0342	330	175	72	77
C1qtnf9	C1q and tumor necrosis factor related protein 9	1.77315	4.87e-05	138	209	47	52
Sapcd1	suppressor APC domain containing 1	1.77153	2.48e-05	189	394.5	68.5	97.5
Omd	osteomodulin	1.77051	3.89e-12	691	964	233	240
Acss3	acyl-CoA synthetase short-chain family member 3	1.77023	0.00919045	115	245.5	48	54
Tpsb2	tryptase beta 2	1.76496	0.000114091	803	420	172	192
Gfra1	glial cell line derived neurotrophic factor family receptor alpha 1	1.76419	0.00272895	781.5	278	159.5	158
FIGF	-	1.75656	5.7e-05	290	806	146	164
Agtr1a	angiotensin II receptor, type 1a	1.74988	1.72e-05	1479	2124	459	592
Cpz	carboxypeptidase Z	1.74482	5.97e-20	5511	8287	1868	2148
Stxbp6	syntaxin binding protein 6 (amisyn)	1.73412	0.000115814	103	203	42	47
LPPR5	-	1.73027	0.0221374	93	481	75	88
Avpr1a	arginine vasopressin receptor 1A	1.72911	0.00076926	160	180	56	44
Ptgis	prostaglandin I2 (prostacyclin) synthase	1.72733	0.00076926	364	1161	208	230
Pdgfrl	platelet-derived growth factor receptor-like	1.71462	1.39e-17	2306	3654	818	951
F13a1	coagulation factor XIII, A1 subunit	1.71139	0.035635	5000	9748	2042	2308
SDPR	-	1.71056	2.07e-08	767	874	216	280
Smpd3	sphingomyelin phosphodiesterase 3, neutral	1.71054	0.00200599	808	1760	356	399
Ar	androgen receptor	1.70392	0.000312562	135	273	65	55
Cgref1	cell growth regulator with EF hand domain 1	1.70269	1.63e-10	1884	3535	740	873
Cd163	CD163 antigen	1.7017	0.0269028	2504.5	3992	884.5	1063
Slc47a1	solute carrier family 47, member 1	1.70097	0.000293239	120	233	50	55
Fam180a	family with sequence similarity 180, member A	1.69883	0.000569737	183	241	60	68
Pla2g2a	phospholipase A2, group IIA (platelets, synovial fluid)	1.69669	0.00119712	769	363	150	207
OBP3	-	1.69655	0.000206143	639.59	356.8	129.16	183.52
Pcdhb10	protocadherin beta 10	1.69588	0.0491676	63	34	16	14
LOC259246	-	1.69536	0.0402946	104.77	52.88	18.49	31.84
Hdc	histidine decarboxylase	1.69026	0.00172082	251	141	54	69
Prelp	proline arginine-rich end leucine-rich repeat	1.68822	3.57e-20	4619	6950	1609	1896
Slc43a3	solute carrier family 43, member 3	1.6751	0.000144794	521	402	147	140
Mmp27	matrix metallopeptidase 27	1.67429	2.64e-08	1535	2857	603	732
LOC298116	-	1.66723	0.045726	101.27	50.88	17.99	31.34
Matn4	matrilin 4	1.66307	0.057756	44	73.5	19	17
A2m	alpha-2-macroglobulin	1.66296	5.55e-10	1150	1761	419	477
Cd34	CD34 antigen	1.66292	1.15e-08	3574	6204	1399	1597
Gap43	growth associated protein 43	1.65669	5.17e-07	343	686	143	173
Sema3d	sema domain, immunoglobulin domain (Ig), short basic domain, secreted, (semaphorin) 3D	1.65488	1.81e-05	445	1128	223	256
Tfcp2l1	transcription factor CP2-like 1	1.6546	0.0431564	62	48	15	20
Ang	angiogenin, ribonuclease, RNase A family, 5	1.65161	1.73e-05	145.25	223	55.5	57.5
Arsi	arylsulfatase i	1.65154	0.00201512	154	364	63	97
Fhl5	four and a half LIM domains 5	1.65109	0.00220275	90	74	24	28
RGD1566134	-	1.65093	0.000529284	495.8	276.77	106.03	144.02
Lsamp	limbic system-associated membrane protein	1.6493	0.0570316	103	45	22	26
Bmx	BMX non-receptor tyrosine kinase	1.64684	0.0304988	56	42	17	14
Rbp4	retinol binding protein 4, plasma	1.6424	0.0529536	468	388	136	136
Sod3	superoxide dismutase 3, extracellular	1.64161	3.08e-12	3073	3809	1026	1138
Gdf10	growth differentiation factor 10	1.63789	0.0284471	513	162	123	97
Slco2b1	solute carrier organic anion transporter family, member 2b1	1.63757	1.04e-05	1417	1460	442	470
Tspyl4	TSPY-like 4	1.63616	0.0163099	54	64	21	16
Rgs5	regulator of G-protein signaling 5	1.63572	9.59e-07	1254	1015	342	386
Me3	malic enzyme 3, NADP(+)-dependent, mitochondrial	1.63289	0.00517446	111	113	37	34
Hoxc8	homeobox C8	1.63214	0.000491837	154	189	57	51
Igf1	insulin-like growth factor 1	1.63206	0.000525426	2340	2507	734	808
Vnn1	vanin 1	1.63142	0.000255928	624	957	228	270
Tnfrsf11b	tumor necrosis factor receptor superfamily, member 11b (osteoprotegerin)	1.62481	3.84e-11	1230	2141	480	583
Ebf2	early B cell factor 2	1.62399	0.000578853	246	495	103	130
RGD1305645	-	1.61848	0.000436984	161	228	57	67
Il1r2	interleukin 1 receptor, type II	1.61751	2e-05	1527	1697.5	486	550
Gria2	glutamate receptor, ionotropic, AMPA2 (alpha 2)	1.6092	0.0410407	29	50.5	14.5	11
Efcab1	EF-hand calcium binding domain 1	1.60718	0.014679	46	53	15	17
Zdhhc15	zinc finger, DHHC domain containing 15	1.6046	0.000116602	143	256.5	54	74
Pcsk5	proprotein convertase subtilisin/kexin type 5	1.60402	5.08e-07	580	1058	245	277
Sema3b	sema domain, immunoglobulin domain (Ig), short basic domain, secreted, (semaphorin) 3B	1.59813	1.16e-08	908	1510	351	427
Lims2	LIM and senescent cell antigen like domains 2	1.58477	3.41e-17	950	1194	326	376
Nalcn	sodium leak channel, non-selective	1.58333	0.0382482	53	70	21	19
Asgr2	asialoglycoprotein receptor 2	1.58182	6.43e-09	560	856	210	252
Cdkl1	cyclin-dependent kinase-like 1 (CDC2-related kinase)	1.58112	0.0539664	40	41	10	17
Thbs2	thrombospondin 2	1.57886	1.62e-38	8457	10948	3004	3361
Pcdh18	protocadherin 18	1.57723	2.1e-09	557	897	224	250
Fbn1	fibrillin 1	1.57192	1.95e-06	19061	46853	10032	11212
Sult1a1	sulfotransferase family 1A, phenol-preferring, member 1	1.5682	1.1e-12	1128	960	326	375
Agt	angiotensinogen (serpin peptidase inhibitor, clade A, member 8)	1.56529	0.0493239	584	312	152	153
LOC259244	-	1.56463	0.00126245	398.88	228.8	93.94	120.69
Adm	adrenomedullin	1.56355	0.00288311	148	374	75	95
Mfap2	microfibrillar-associated protein 2	1.5604	4.78e-12	4427	5365	1441	1835
Cdon	cell adhesion molecule-related/down-regulated by oncogenes	1.55575	0.000119177	1242	2277	530	631
Npy	neuropeptide Y	1.55513	0.046219	201	91	47	54
Zim1	zinc finger, imprinted 1	1.55227	0.0942747	135	58	31	36
C1qb	complement component 1, q subcomponent, beta polypeptide	1.54684	0.000492	8133	9717	2760	3255
Prss23	protease, serine 23	1.54275	3.55e-12	2419	4046	1067	1080
Pcdhac2	protocadherin alpha subfamily C, 2	1.54254	0.00509251	54.87	88	20.93	27.47
Aldh3a1	aldehyde dehydrogenase family 3, subfamily A1	1.54167	8.02e-07	226	215	71	79
Pla2r1	phospholipase A2 receptor 1	1.54101	0.00368003	88	139	27	50
CTGF	-	1.53902	0.00188	2444	3896	1043	1072
LOC298111	-	1.53868	0.0592725	75.5	46.74	16.02	26.75
Pdgfc	platelet-derived growth factor, C polypeptide	1.53645	8.95e-07	243	282	94	83
C1qtnf3	C1q and tumor necrosis factor related protein 3	1.53328	2e-05	1796	1751	568	646
Gata6	GATA binding protein 6	1.53247	0.00631129	73	120	30.5	35
Igfbp5	insulin-like growth factor binding protein 5	1.52574	4.01e-05	5466	12746	2823	3255
Tgfbr3	transforming growth factor, beta receptor III	1.51956	3.68e-09	2145	2657	768	877
LOC500300	-	1.51952	0.0170929	159	659	105	168
C1qc	complement component 1, q subcomponent, C chain	1.51835	0.000144794	13096	15666	4624	5247
LGALS5	-	1.51748	0.0182266	186.5	168.5	55.5	67
Gpx3	glutathione peroxidase 3	1.50782	4.57e-18	32895	30277	10116	11970
Zbtb20	zinc finger and BTB domain containing 20	1.50712	2.19e-06	220	296	82	96
SEPP1	-	1.50697	2.48e-05	54228	62482.5	18924.5	21506.5
Clec10a	C-type lectin domain family 10, member A	1.50353	7.99e-05	3816	4483.5	1329	1554.5
Mstn	myostatin	1.49917	0.00886447	204	142	47	77
Aspn	asporin	1.49767	2.48e-12	6239	5757	2004.67	2207
Cybrd1	cytochrome b reductase 1	1.49614	7.55e-18	1276	1751	463	591
Entpd2	ectonucleoside triphosphate diphosphohydrolase 2	1.49513	4.91e-13	1245	1736	500	532
Clec2l	C-type lectin domain family 2, member L	1.49377	9.46e-05	391	893	202	237
Olfml1	olfactomedin-like 1	1.49175	8.02e-07	1410	1858	510	632
LOC501110	-	1.49108	1.35e-07	388	369	124	143
Cck	cholecystokinin	1.48734	0.0447878	288	95	66	74
Ikbip	IKBKB interacting protein	1.48068	3.55e-08	869.5	1527.5	407.5	423
Col11a1	collagen, type XI, alpha 1	1.47507	1.67e-07	886	1702	410	492
Kcnj8	potassium inwardly-rectifying channel, subfamily J, member 8	1.47273	8.67e-05	451	735	199	216
Pde1b	phosphodiesterase 1B, Ca2+-calmodulin dependent	1.47122	0.0700373	46	72	15	27
Kit	KIT proto-oncogene receptor tyrosine kinase	1.46994	1.51e-06	251	386	99	126
Tmem263	transmembrane protein 263	1.46713	2.16e-05	282.5	516.5	137	142.5
Sparc	secreted acidic cysteine rich glycoprotein	1.46136	1.75e-24	351496	484939	134425	163386
Pparg	peroxisome proliferator activated receptor gamma	1.45909	0.00273521	400	789	181	239
Asb11	ankyrin repeat and SOCS box-containing 11	1.45866	0.0890823	291	77	65	73
Tagln	transgelin	1.45566	8.39e-05	2648	3955	1098	1250
Stc2	stanniocalcin 2	1.45411	0.0416676	47	86	14	34
Fstl1	follistatin-like 1	1.4538	8.29e-09	13317	25921	6356	7503
Cdh7	cadherin 7, type 2	1.45231	0.000966517	90	110	32	40
Timp4	tissue inhibitor of metalloproteinase 4	1.45092	3.42e-06	239	290	91	99
Prex2	phosphatidylinositol-3,4,5-trisphosphate-dependent Rac exchange factor 2	1.44839	2.02e-07	526	449	154	203
Col3a1	collagen, type III, alpha 1	1.44189	1.97e-12	833311	1.3772e+06	373574	416472
Ntn1	netrin 1	1.44014	0.0572029	65	53	14	30
Xpnpep2	X-prolyl aminopeptidase (aminopeptidase P) 2, membrane-bound	1.43864	0.00810227	393	1029	230	273
Adgrf5	adhesion G protein-coupled receptor F5	1.43808	1.7e-10	1681	1406	508	630
C1qtnf2	C1q and tumor necrosis factor related protein 2	1.43802	2.82e-12	1899	2137	700	766
Fndc1	fibronectin type III domain containing 1	1.43249	8.14e-09	4598	8304.5	2185	2443
Adamts5	a disintegrin-like and metallopeptidase (reprolysin type) with thrombospondin type 1 motif, 5 (aggrecanase-2)	1.43134	0.000367738	569	1149	281	335
FCRL2	-	1.42849	9.29e-09	2790	3909	1152	1279
Ccl24	chemokine (C-C motif) ligand 24	1.42745	0.000164626	824	1157	337	383
Mme	membrane metallo endopeptidase	1.42553	0.0456888	324	616	155	184
Ddr2	discoidin domain receptor family, member 2	1.421	8.63e-08	1944	3351	872	1051
Pam	peptidylglycine alpha-amidating monooxygenase	1.421	4.44e-16	5003	7603	2173	2412
Osr2	odd-skipped related 2	1.41944	0.00887144	200	588	140	140
Scn3a	sodium channel, voltage-gated, type III, alpha	1.41751	0.0152543	240	125.75	53.83	86.25
Col1a2	collagen, type I, alpha 2	1.41367	2.15e-07	367352	609746	167368	188852
Aoc3	amine oxidase, copper containing 3	1.41237	0.000104643	3045	2223	910	1074
Mfap4	microfibrillar-associated protein 4	1.40497	7.32e-08	17008	16865	5712	6986
Ephb2	Eph receptor B2	1.40493	3.54e-06	211	238	79	88
Sgce	sarcoglycan, epsilon	1.40468	4.71e-14	773	915	271	359
Dmrt2	doublesex and mab-3 related transcription factor 2	1.40039	0.00654044	272	210	95	86
Serpinf1	serine (or cysteine) peptidase inhibitor, clade F, member 1	1.39847	2.82e-14	21343	28574	8740	9790
Ppp1r1a	protein phosphatase 1, regulatory inhibitor subunit 1A	1.39281	0.0250584	354	154	91	106
Tmeff2	transmembrane protein with EGF-like and two follistatin-like domains 2	1.39244	2.05e-05	991	977	322	423.5
Klra1	killer cell lectin-like receptor, subfamily A, member 1	1.3909	0.00673207	122	284	77	71
Cd72	CD72 antigen	1.39036	1.01e-06	283	353	114	123.5
Angpt2	angiopoietin 2	1.3886	2.27e-07	574.5	494	172	236
Tgfb3	transforming growth factor, beta 3	1.38774	8.01e-19	1517	1594	530	647
MAN1A1	-	1.38708	2.12e-12	2900	3322	1068	1279
Tlr11	toll-like receptor 11	1.38587	0.0685973	53	162	41	37
Gstm2	glutathione S-transferase, mu 2	1.38483	1.84e-09	2393.25	3913.25	1091	1258.5
Lrrn4cl	LRRN4 C-terminal like	1.38432	4.13e-05	2430	4916	1243	1477
Tph1	tryptophan hydroxylase 1	1.38093	0.0813532	183	99	47	63
Pcolce	procollagen C-endopeptidase enhancer protein	1.37923	1.36e-17	21474	28458	8911	9873
Gata2	GATA binding protein 2	1.37864	0.0420013	197	84	51	59
Tnfsf10	tumor necrosis factor (ligand) superfamily, member 10	1.37569	0.000104643	161	186	49	84
Rai2	retinoic acid induced 2	1.36785	0.000457726	256	217	72	112
Ogn	osteoglycin	1.36771	4.2e-09	10486	11028	3827.5	4412.5
Sfrp4	secreted frizzled-related protein 4	1.36722	2.61e-06	13027	14608	4824	5752
Foxred2	FAD-dependent oxidoreductase domain containing 2	1.36618	0.0526871	67	112	36	31
RGD1309821	-	1.36485	8.91e-07	371	343	137	137
Fbxl13	F-box and leucine-rich repeat protein 13	1.36369	0.0439857	47.5	89	21	31
Amph	amphiphysin	1.36217	0.00123316	132	152	49	60
Mup4	major urinary protein 4	1.35974	0.0979864	144.27	66.13	32.18	52.34
OLR63	-	1.3595	0.052081	90	58	26	32
Dkk2	dickkopf WNT signaling pathway inhibitor 2	1.35837	0.0899126	107	55	29	35
Islr	immunoglobulin superfamily containing leucine-rich repeat	1.35824	1.02e-07	1191	1711	509	598
Reck	reversion-inducing-cysteine-rich protein with kazal motifs	1.35377	7.74e-14	1044.5	1452	450	505
Vldlr	very low density lipoprotein receptor	1.35108	2.86e-05	1092	2235	598	659
Socs2	suppressor of cytokine signaling 2	1.34823	0.00475	124	171	65	47
P4ha2	procollagen-proline, 2-oxoglutarate 4-dioxygenase (proline 4-hydroxylase), alpha II polypeptide	1.34809	5.45e-08	3294	5038	1528	1656
Pcsk6	proprotein convertase subtilisin/kexin type 6	1.34447	0.00014756	1049	2010	531	636
Ldb2	LIM domain binding 2	1.34115	6.5e-05	617.5	450	203	218
Tspan18	tetraspanin 18	1.33633	6.06e-08	856	822	312.5	346
LOC259245	-	1.33404	0.0147304	332	214.19	92.28	127.17
Zfpm2	zinc finger protein, multitype 2	1.33293	0.0012495	147	267	70	90
Fat4	FAT atypical cadherin 4	1.33266	1.22e-11	880	1011	341	399
Fam13a	family with sequence similarity 13, member A	1.33088	0.00431513	208	163	54	95
Lhfp	lipoma HMGIC fusion partner	1.33	6.43e-10	1212	1648	504	612
Mest	mesoderm specific transcript	1.32999	0.00409782	269	177	76	103
Cdh5	cadherin 5	1.32459	5.6e-11	1317	1204	440	563
Prrg1	proline rich Gla (G-carboxyglutamic acid) 1	1.32322	0.000572875	151	214	64	79
Cdkn1c	cyclin-dependent kinase inhibitor 1C (P57)	1.3219	0.0286133	834	369	214	278
FAM46A	-	1.3216	5.97e-05	729	1502	418	441
Cyp39a1	cytochrome P450, family 39, subfamily a, polypeptide 1	1.32077	0.0184674	157	184	73	60
Pcdha3	protocadherin alpha 3	1.32031	0.0715513	31.9	56.5	19.1	14.97
Mn1	meningioma 1	1.31914	0.0665579	193	87	46	69
Itga8	integrin alpha 8	1.31662	0.000338	351	724	199	217
Rnase4	ribonuclease, RNase A family 4	1.30907	1.44e-11	10105.2	13211.5	4213.5	5024.5
PLAC9	-	1.30897	8.93e-06	535	657	226	246
TUSC5	-	1.30776	0.00146041	426	769	218	250
Mup5	major urinary protein 5	1.30368	0.0190868	373.17	234.36	104.45	144.84
Rarres2	retinoic acid receptor responder (tazarotene induced) 2	1.30262	9.9e-06	4298	6951	2068.5	2368
Ltbp1	latent transforming growth factor beta binding protein 1	1.30208	1.65e-06	1723	2570	803	894
Ntsr1	neurotensin receptor 1	1.29825	0.0321	173	233	66	97
SEPW1	-	1.29643	9.88e-16	3293	3122	1196	1396
Loxl4	lysyl oxidase-like 4	1.29565	5.6e-11	677	953	315	333
Itga1	integrin alpha 1	1.29433	2.96e-06	260	325	112	122
Galnt16	polypeptide N-acetylgalactosaminyltransferase 16	1.29199	6.77e-11	1852	2942	897	1008
Cfb	complement factor B	1.29103	9.93e-07	1762	3194	939	1020
Larp6	La ribonucleoprotein domain family, member 6	1.28999	0.00124073	192	250	77	101
Tinagl1	tubulointerstitial nephritis antigen-like 1	1.28885	0.000603318	869	527	272	303
Slc2a5	solute carrier family 2 (facilitated glucose transporter), member 5	1.28731	0.045726	77	108	36	38
Slc4a4	solute carrier family 4 (anion exchanger), member 4	1.28633	0.0412686	85	264	75	60
Pcdha4	protocadherin alpha 4	1.28629	0.0163038	69.4	104.5	35.1	33.97
Nfia	nuclear factor I/A	1.28519	0.000313674	226	275	95	107
Adgre1	adhesion G protein-coupled receptor E1	1.28511	0.000320835	1990	2418	828	950
GUCY1B3	-	1.28443	0.0150948	205	196	70	94
Rgs4	regulator of G-protein signaling 4	1.2844	0.000121614	546	513	203	228
Zfp354c	zinc finger protein 354C	1.28393	0.000934551	248	279	102	111
C1qa	complement component 1, q subcomponent, alpha polypeptide	1.28307	0.00194501	12303	14979	5181	5830
Edn1	endothelin 1	1.28098	0.028808	83	209	57	58
Pid1	phosphotyrosine interaction domain containing 1	1.28015	4.09e-08	536	659	206	279.5
Mfap5	microfibrillar associated protein 5	1.27706	3.02e-10	10170	15919	4837	5655
Actg2	actin, gamma 2, smooth muscle, enteric	1.27381	0.00262897	230	204	78	101
Gda	guanine deaminase	1.27204	5.22e-17	3852	4712	1536	1962
Art3	ADP-ribosyltransferase 3	1.26866	0.000905342	1742	2128	700	884
Rcan2	regulator of calcineurin 2	1.26728	0.000574628	449	618	194	241
Scara5	scavenger receptor class A, member 5	1.26698	0.000120749	4897	7976	2393	2814
EMR4	-	1.2633	0.0612906	54	128	34	39
Clec11a	C-type lectin domain family 11, member a	1.26308	4.36e-05	1005	724	339	382
Postn	periostin, osteoblast specific factor	1.26216	8.92e-08	77637	128727	39026	44580
Cpd	carboxypeptidase D	1.25872	4.36e-10	1636	2433	764	897
Mrc1	mannose receptor, C type 1	1.25813	0.000228	6487	7449	2572	3183
Camk2n1	calcium/calmodulin-dependent protein kinase II inhibitor 1	1.25762	0.0206316	75	137	32	55
Add3	adducin 3 (gamma)	1.25667	1.43e-08	2719	4338	1358	1514
Serpina3n	serine (or cysteine) peptidase inhibitor, clade A, member 3N	1.25489	0.000918404	1410.5	1736	598	698.5
Zbtb16	zinc finger and BTB domain containing 16	1.25438	0.0663645	278	118	86	82
Nova1	NOVA alternative splicing regulator 1	1.2509	0.00392121	288	537	162	173
Maob	monoamine oxidase B	1.25074	0.00202754	261	268	101	119
Syndig1	synapse differentiation inducing 1	1.25003	0.0609198	58	70	24	29
Cytl1	cytokine-like 1	1.2444	0.00111919	332	242	108	135
Slc2a10	solute carrier family 2 (facilitated glucose transporter), member 10	1.24343	5.98e-08	401	518	185	195
2021-03-01	-	1.24227	0.0902105	113	215	57	78
Zfp521	zinc finger protein 521	1.23568	5.89e-09	833	1130	383	433
Cd38	CD38 antigen	1.23445	0.000229921	597	1183	328	405
Fzd4	frizzled class receptor 4	1.23412	4.25e-06	1197	1009	428	507
Agmo	alkylglycerol monooxygenase	1.23337	0.0790564	160	85	44	62
Ankrd29	ankyrin repeat domain 29	1.22448	0.000136848	247	409	113	162
Fbln5	fibulin 5	1.22338	1.45e-09	1505	1851	667	744
P2ry13	purinergic receptor P2Y, G-protein coupled 13	1.22206	0.0584107	161	302	84	109
Srpx	sushi-repeat-containing protein	1.22192	1.11e-18	4174	5611	1912	2197
Itm2a	integral membrane protein 2A	1.21939	0.00207858	7116	4685	2367.5	2727
Emcn	endomucin	1.21938	6.48e-07	968	843	336	441
Acta2	actin, alpha 2, smooth muscle, aorta	1.21874	0.00598418	1977	2887	973	1064
Twsg1	twisted gastrulation BMP signaling modulator 1	1.21669	0.000493376	191	261.83	88.5	103
Robo2	roundabout guidance receptor 2	1.21577	2.43e-05	282	335	108	155
Apc2	APC regulator of WNT signaling pathway 2	1.21557	0.00290652	146.5	144	54.5	70.5
GUCY1A3	-	1.21306	0.0337273	214	137	57	97
Sec23a	SEC23 homolog A, COPII coat complex component	1.2127	1.31e-07	1634	2671	853	952
Rarres1	retinoic acid receptor responder (tazarotene induced) 1	1.21256	0.0163099	1268	1217	477	589
Dpt	dermatopontin	1.21075	1.38e-07	26783.3	27374	10548.2	12635.7
Cysltr1	cysteinyl leukotriene receptor 1	1.20886	0.00194795	129	221	71	76
Shroom4	shroom family member 4	1.20468	0.00156387	152	146	51	78
Ghr	growth hormone receptor	1.20404	0.000865767	1297	1511.5	581	616
Nuak1	NUAK family, SNF1-like kinase, 1	1.20403	0.000857001	200	283	80	127
Aldh1l2	aldehyde dehydrogenase 1 family, member L2	1.20209	2.26e-08	1477	2188	683	878
Pmfbp1	polyamine modulated factor 1 binding protein 1	1.20175	0.00379379	271	199	90	115
Phkg1	phosphorylase kinase gamma 1	1.20053	0.0612563	291.5	125.5	94	89.5
Map2k6	mitogen-activated protein kinase kinase 6	1.20017	0.000410018	232	279	108	110
Col1a1	collagen, type I, alpha 1	1.19816	2.3e-07	457703	698125	231067	259605
TF	-	1.19793	0.0112216	7569	16194	4626	5357
Jam2	junction adhesion molecule 2	1.19619	0.00252107	1188	660	353	466
C4b	complement component 4B (Chido blood group)	1.19354	0.00606258	27849.8	68116.6	19173.5	21008
Irf4	interferon regulatory factor 4	1.19302	0.000308135	707	1489	434	492
Gal3st4	galactose-3-O-sulfotransferase 4	1.19289	0.000733309	327	370	136	165
Plscr4	phospholipid scramblase 4	1.19254	0.000624542	510	449	210	205
Tgfb2	transforming growth factor, beta 2	1.19158	2.4e-05	490	815	242	316
Ust	uronyl-2-sulfotransferase	1.18897	0.0365017	78	82	26	44
Hspa12b	heat shock protein 12B	1.18879	2.66e-08	472.5	603.5	210.5	253.5
Pard3b	par-3 family cell polarity regulator beta	1.1885	0.00433659	126	149	53	66
Tmem100	transmembrane protein 100	1.18742	4.96e-06	997	968	384	473
Slc6a4	solute carrier family 6 (neurotransmitter transporter, serotonin), member 4	1.1865	0.0364571	170	106	56	66
Peli2	pellino 2	1.18547	3.33e-05	287	402	142	154
Fam107a	family with sequence similarity 107, member A	1.18379	0.0443686	185	101	60	67
Ism1	isthmin 1, angiogenesis inhibitor	1.18075	0.0794092	63	67	23	34
Pcdh12	protocadherin 12	1.17733	0.0457927	123	138	59	54
LOC100361083	-	1.17706	1.35e-05	279	377.5	129.5	155
Csrp2	cysteine and glycine-rich protein 2	1.17584	4.52e-05	1011	1577	534	580
Myh10	myosin, heavy polypeptide 10, non-muscle	1.17445	0.0124653	1023	2056	583	739
Sox17	SRY (sex determining region Y)-box 17	1.17406	0.00296161	157	141	62	69
Rarb	retinoic acid receptor, beta	1.17159	0.0510361	136	249	75	91
Ccl6	chemokine (C-C motif) ligand 6	1.17009	0.0321253	1307	3258	862	1090
Slc2a3	solute carrier family 2 (facilitated glucose transporter), member 3	1.16937	0.00154665	275	406	143	152
Hfe	homeostatic iron regulator	1.16557	0.00431513	176	222	83	91
Lyve1	lymphatic vessel endothelial hyaluronan receptor 1	1.16393	0.00124073	1706	2516	858	981
Runx1t1	RUNX1 translocation partner 1	1.16382	0.0126959	86	107	36	49
Casp12	caspase 12	1.16352	1.85e-08	487	641	237	256
Ehbp1	EH domain binding protein 1	1.16317	0.00180294	443	815	235	312
PVRL3	-	1.16263	2.71e-05	333.5	452	159.5	183.5
P4ha3	procollagen-proline, 2-oxoglutarate 4-dioxygenase (proline 4-hydroxylase), alpha polypeptide III	1.16234	0.0524663	228	422	147	132
Shox2	short stature homeobox 2	1.16134	0.0199692	121	129	63	46
Col5a1	collagen, type V, alpha 1	1.15941	0.00325132	19147	30255	10353	11128
Lgals9	lectin, galactose binding, soluble 9	1.15855	0.000243257	619.5	1268.5	363.5	455
Sulf1	sulfatase 1	1.15792	2.12e-05	1628.5	2557	836	993
Myct1	myc target 1	1.15677	0.00516536	210	159	71	95
Klf15	Kruppel-like factor 15	1.15644	0.016639	289	202	108	112
Cfd	complement factor D (adipsin)	1.15629	0.015953	6589	5782	2571	2951
Adgrl4	adhesion G protein-coupled receptor L4	1.15629	2.44e-06	1271	998	462	556
Siglec1	sialic acid binding Ig-like lectin 1, sialoadhesin	1.15429	4.64e-05	2480	3366	1207	1363
Osbpl6	oxysterol binding protein-like 6	1.15374	0.00138856	230	242	86	125
Flrt2	fibronectin leucine rich transmembrane protein 2	1.15265	3.15e-07	392	511	181	218
Igfbp3	insulin-like growth factor binding protein 3	1.15159	5.34e-07	598	879	298	352
Klhl29	kelch-like 29	1.15086	0.0284471	109	142	59	51
WISP1	-	1.15057	0.0116234	350	576	180	227
Mylk	myosin, light polypeptide kinase	1.14972	5.37e-05	859	709	316	390
Peg12	paternally expressed 12	1.14852	0.0321654	125	152	56	67
Smarca1	SWI/SNF related, matrix associated, actin dependent regulator of chromatin, subfamily a, member 1	1.14554	0.0121884	139	156	65	66
Ephx1	epoxide hydrolase 1, microsomal	1.14278	1.6e-05	1314	1585.5	604	687
Khdrbs3	KH domain containing, RNA binding, signal transduction associated 3	1.14146	0.000364399	254	286	123	117
Rab30	RAB30, member RAS oncogene family	1.13856	0.000406425	361	523	193	198
Fkbp9	FK506 binding protein 9	1.13574	2.03e-07	5597	9392	3091	3536
Pknox2	Pbx/knotted 1 homeobox 2	1.13132	0.00302482	185	165	71	88
Pdgfra	platelet derived growth factor receptor, alpha polypeptide	1.12985	1.78e-06	4847	6942	2495	2762.5
Ano1	anoctamin 1, calcium activated chloride channel	1.12858	0.0855284	140	98	51	58
Irx1	Iroquois homeobox 1	1.12813	0.00277422	193	184	79	92
Ebf1	early B cell factor 1	1.12579	2.45e-06	427	563	214	230
Sema3c	sema domain, immunoglobulin domain (Ig), short basic domain, secreted, (semaphorin) 3C	1.12389	0.000868618	3523	7372	2241	2580
Tspan8	tetraspanin 8	1.12187	0.00432501	713	421	233	294
Met	met proto-oncogene	1.12136	0.0359863	279	887	228	284
Slc9a9	solute carrier family 9 (sodium/hydrogen exchanger), member 9	1.12051	0.0225051	514	593	223	280
Fbln1	fibulin 1	1.1194	0.040862	1946	1233	677	797
Nbl1	NBL1, DAN family BMP antagonist	1.11852	1.28e-06	4725	7199	2565	2778
Nt5e	5' nucleotidase, ecto	1.11769	2.9e-11	876	1067	420	459
Tacr1	tachykinin receptor 1	1.11765	0.019909	135	102	51	58
Cpeb1	cytoplasmic polyadenylation element binding protein 1	1.11645	0.0450348	70	122	41	45
Ebf3	early B cell factor 3	1.1132	0.00944	518	600	216	296
NXPE1	-	1.1109	3.42e-05	303	311	140	140
Vwf	Von Willebrand factor	1.10793	0.0111907	1070	635	356	444
Lamb2	laminin, beta 2	1.10408	4.54e-12	5244	5666	2402	2598
Hs3st1	heparan sulfate (glucosamine) 3-O-sulfotransferase 1	1.10107	0.000781271	225	305	105	138
Plce1	phospholipase C, epsilon 1	1.09937	0.000435436	365	616	223	220
Ramp2	receptor (calcitonin) activity modifying protein 2	1.09905	1.86e-05	1258.5	1041.5	512	556.5
Angpt4	angiopoietin 4	1.09738	0.0169023	543	1269	372	443
Peg3	paternally expressed 3	1.0955	5.85e-05	1772.5	1771.5	744.5	901
Mgll	monoglyceride lipase	1.09419	0.0152627	333	433	156	197
Pde3b	phosphodiesterase 3B, cGMP-inhibited	1.0906	0.00287139	197	333	121	120
Axl	AXL receptor tyrosine kinase	1.09015	0.00011852	4018	7800	2468	2903
Fam126a	family with sequence similarity 126, member A	1.08939	0.00464864	305	672.5	202	241
Pecam1	platelet/endothelial cell adhesion molecule 1	1.08825	3.35e-05	2536	1876	972	1104
Scrn1	secernin 1	1.08763	1.33e-06	504	713	270	289
RT1-BA	-	1.08622	1.62e-06	4263	7101	2389	2818
Lepr	leptin receptor	1.0837	0.00833615	179	175	72.5	94.5
Pde2a	phosphodiesterase 2A, cGMP-stimulated	1.08112	2.76e-05	774	637	321	342
Cd248	CD248 antigen, endosialin	1.08047	9.06e-07	8296.87	14018.8	4836.93	5402.92
Ptx3	pentraxin related gene	1.08029	0.0495648	125	130	49	71
Cthrc1	collagen triple helix repeat containing 1	1.07833	1.18e-18	5581	6143	2621	2846
Gfra2	glial cell line derived neurotrophic factor family receptor alpha 2	1.07774	0.0264727	189	253	97	108
Fkbp7	FK506 binding protein 7	1.07719	2.77e-11	1547	1966	720	920
Apobec2	apolipoprotein B mRNA editing enzyme, catalytic polypeptide 2	1.07582	0.0172036	2502	1285	827	997
Mid1	midline 1	1.0751	0.0226754	113	156	50	76
Rnf144a	ring finger protein 144A	1.07431	0.00520853	135	221	74	91
Ackr2	atypical chemokine receptor 2	1.07335	0.0805426	136	123	51	72
Ctsh	cathepsin H	1.07051	0.000126093	17719	27682.5	9661	11417
Cxcl12	chemokine (C-X-C motif) ligand 12	1.07035	0.0416276	13057	11299	5357	6191
Sorbs2	sorbin and SH3 domain containing 2	1.06985	0.00651	389	274	150	166
Ppic	peptidylprolyl isomerase C	1.06953	4.67e-11	3771	5061	1919	2203
Rtn4rl1	reticulon 4 receptor-like 1	1.06696	0.0133732	235	203	104	103
Nqo2	N-ribosyldihydronicotinamide quinone reductase 2	1.06695	0.00335168	228	271	104	131
S100b	S100 protein, beta polypeptide, neural	1.06498	0.0124653	697	612	285	338
Rasl11b	RAS-like, family 11, member B	1.06498	0.0973004	59	134	41	48
Ackr3	atypical chemokine receptor 3	1.06376	0.000563057	6115	4910.5	2437.5	2828
Clec14a	C-type lectin domain family 14, member a	1.0635	0.00172082	623	488	245	286
Ehd2	EH-domain containing 2	1.06262	1.49e-05	2543	3612	1337	1544
APEG3	-	1.06207	0.0305876	129.5	117.5	54.5	64
Olfml3	olfactomedin-like 3	1.05966	1.15e-15	2973	3727	1507	1644
Arc	activity regulated cytoskeletal-associated protein	1.05925	0.0539664	71	94	33	45
Lysmd3	LysM, putative peptidoglycan-binding, domain containing 3	1.05908	0.00450631	163	272	88	116
Glb1l	galactosidase, beta 1-like	1.05889	6.81e-07	1219	1624.5	610	729
Tmem255a	transmembrane protein 255A	1.05528	0.0954345	79	162	53	59
Fkbp14	FK506 binding protein 14	1.05476	4.84e-08	905	1258	474	545
Oas1b	2'-5' oligoadenylate synthetase 1B	1.05351	0.020768	302.5	507.5	171.67	207.67
Insr	insulin receptor	1.05347	6.45e-05	259	328	136	141
C1qtnf1	C1q and tumor necrosis factor related protein 1	1.05284	9.51e-07	1871	2610	1036	1069
Cercam	cerebral endothelial cell adhesion molecule	1.05228	0.000360691	2697.5	4013	1514	1637
CLIC2	-	1.05142	3.56e-07	1448	1712	680	823
Col5a2	collagen, type V, alpha 2	1.05031	0.000262422	31007	42193.5	16302	18267
Cgnl1	cingulin-like 1	1.04938	4.57e-05	482	456	212	237
Zfhx4	zinc finger homeodomain 4	1.0491	0.00165292	742	1079	384	478
Cdc42ep2	CDC42 effector protein (Rho GTPase binding) 2	1.04827	2.26e-08	792	909.5	375	436
Cpq	carboxypeptidase Q	1.04682	2.43e-05	3175	3731	1460	1841
WISP2	-	1.04621	0.0284164	4701	4982	2166	2465
Calcrl	calcitonin receptor-like	1.04566	0.00148003	635	713	298	346
Serpinh1	serine (or cysteine) peptidase inhibitor, clade H, member 1	1.04465	1.08e-06	22878	37299	13094	15294
Plscr1	phospholipid scramblase 1	1.04444	0.017776	268	418	145	180
Kdelr3	KDEL (Lys-Asp-Glu-Leu) endoplasmic reticulum protein retention receptor 3	1.0436	5.89e-09	3215	4434	1704	1925
Rtn1	reticulon 1	1.04282	0.0816761	95	189	80	51
Fcgrt	Fc receptor, IgG, alpha chain transporter	1.04072	0.00128253	8903	10421.5	4276	4975
Tc2n	tandem C2 domains, nuclear	1.03959	0.0241368	224	149	77	106
Mcam	melanoma cell adhesion molecule	1.03931	9.74e-07	1091	1111	478	584
Robo4	roundabout guidance receptor 4	1.03907	0.0175561	163.75	136.5	62.25	84.5
Fzd2	frizzled class receptor 2	1.03875	0.00155882	521	804	305	322
Rhoj	ras homolog family member J	1.03789	7.17e-05	942	1093	454	522
Asrgl1	asparaginase like 1	1.03592	0.0347272	144	136	58	78
Sptbn1	spectrin beta, non-erythrocytic 1	1.03549	2.26e-21	8167	9503	3980	4503
Podxl	podocalyxin-like	1.03484	0.00365005	596	397	223	264
Itgb5	integrin beta 5	1.03363	9.22e-05	3762	5415	2061	2315
B4galt4	UDP-Gal:betaGlcNAc beta 1,4-galactosyltransferase, polypeptide 4	1.03331	0.0036588	279	263	119	144
Vtn	vitronectin	1.03246	0.0148	422	268	173	164
Amigo2	adhesion molecule with Ig like domain 2	1.03204	0.0179899	192	151.5	76	92
Gpx7	glutathione peroxidase 7	1.03124	2.44e-15	2399	2944	1162	1412
Grb10	growth factor receptor bound protein 10	1.02941	1.7e-15	3398.5	3866	1575	1940
Pla2g2d	phospholipase A2, group IID	1.02755	4.51e-10	4914	5735	2372	2774
Gas6	growth arrest specific 6	1.02686	1.6e-05	9333	9119.5	4230	4736
PPAP2B	-	1.02618	0.00603264	2913	4376	1638	1851
Smim1	small integral membrane protein 1	1.0259	0.0166762	111	153	68	58
Pros1	protein S (alpha)	1.02588	7.44e-07	1877	2446	948	1137
Lrrc17	leucine rich repeat containing 17	1.02573	5.66e-07	2245.5	3258	1267	1368
Slc43a1	solute carrier family 43, member 1	1.02439	0.00397914	361	295	160	160
Grem2	gremlin 2, DAN family BMP antagonist	1.0243	0.00270194	597	470	234	291
Csgalnact2	chondroitin sulfate N-acetylgalactosaminyltransferase 2	1.02327	1.66e-11	1872	2463	973	1118
Adarb1	adenosine deaminase, RNA-specific, B1	1.02259	2.75e-09	757	906	377	428
Dcn	decorin	1.02247	8.7e-09	112210	142484	57774	65192.5
Slc2a4	solute carrier family 2 (facilitated glucose transporter), member 4	1.02136	0.0833819	1033	402	352	368
Fcna	ficolin A	1.01998	0.0619376	2281	3682	1337	1523
Tmem98	transmembrane protein 98	1.01901	0.000556333	510	463	213	265
PTRF	-	1.01729	8.66e-05	2833	3161	1425	1485
Tek	TEK receptor tyrosine kinase	1.01625	4.96e-06	819	1072	454	459
Zfp74	zinc finger protein 74	1.01622	0.0137968	135	176	69	82
Akap12	A kinase (PRKA) anchor protein (gravin) 12	1.0159	0.000317479	1613	1917	789	930
Mmp23	matrix metallopeptidase 23	1.01566	4.74e-05	1182	1938	699	802
Prrx1	paired related homeobox 1	1.01168	2.53e-06	952	1438	500	662
C1galt1	core 1 synthase, glycoprotein-N-acetylgalactosamine 3-beta-galactosyltransferase, 1	1.01071	0.00644635	363	625	238	236
Zhx3	zinc fingers and homeoboxes 3	1.00897	8.12e-06	359	447	179	215
Cnrip1	cannabinoid receptor interacting protein 1	1.00758	0.00255507	533	655	275	305
TNXA-PS1	-	1.00756	4.17e-11	1276.5	1473.5	643	702
Crispld2	cysteine-rich secretory protein LCCL domain containing 2	1.00743	1.21e-05	1470	1262	620	734
Nedd4	neural precursor cell expressed, developmentally down-regulated 4	1.00707	3.25e-13	19720	26817	10796	11833
Dcbld2	discoidin, CUB and LCCL domain containing 2	1.00303	0.00857829	387	860	267	334
Cyp4b1	cytochrome P450, family 4, subfamily b, polypeptide 1	1.00234	0.0773002	319	157	111	130
C4a	complement component 4A (Rodgers blood group)	1.00224	0.0283043	18335.8	43545.2	14216.5	15381.8
Duoxa1	dual oxidase maturation factor 1	1.00196	0.0540972	212	520	177	172

## Sheet: Control vs Metaseal
Dataset 2-3: Differentially upregulated genes of Metaseal group, as compared to those of control group.
Gene symbol	Gene name	log2 FC	FDR	Control_1 count	Control_2 count	Metaseal_1 count	Metaseal_2 count
Slc13a2	solute carrier family 13 (sodium-dependent dicarboxylate transporter), member 2	5.74046	0.0431648	17	1	0	0
Myh7	myosin, heavy polypeptide 7, cardiac muscle, beta	5.52372	0.00106075	2065.5	100	9.5	46
Zic1	zinc finger protein of the cerebellum 1	5.41425	0.000135789	28	56	1	1
Krtap19-5	keratin associated protein 19-5	5.37669	9.71e-08	60	61	3	0
Cst6	cystatin E/M	5.16729	6.81e-07	739	6123	92	92
Myl2	myosin, light polypeptide 2, regulatory, cardiac, slow	4.84437	0.000542026	196	20	0	9
Lgi1	leucine-rich repeat LGI family, member 1	4.83641	0.0014495	88	14	1	3
LOC685544	-	4.82028	0.0362653	159	13	6	0
Klk6	kallikrein related-peptidase 6	4.77656	0.00125325	33	19	1	1
Myh6	myosin, heavy polypeptide 6, cardiac muscle, alpha	4.71739	0.0225219	374.5	8	3.5	13
Awat1	acyl-CoA wax alcohol acyltransferase 1	4.674	0.0471749	6	3	0	0
Ros1	Ros1 proto-oncogene	4.60915	0.0967027	20	3	1	0
Ankrd2	ankyrin repeat domain 2 (stretch responsive muscle)	4.44959	0.000557532	59	21	1	3
Sdr16c6	short chain dehydrogenase/reductase family 16C, member 6	4.28386	0.0755371	3	4	0	0
Serpinb7	serine (or cysteine) peptidase inhibitor, clade B, member 7	4.20642	0.0291255	44	11	3	0
Vgll2	vestigial like family member 2	4.06599	0.0493442	26	5	1	1
RT1-M2	-	3.95249	0.0434349	36	6	1	2
Pinlyp	phospholipase A2 inhibitor and LY6/PLAUR domain containing	3.94429	0.0307996	250	29	16	2
Atp12a	ATPase, H+/K+ transporting, nongastric, alpha polypeptide	3.82772	0.0978373	35	1	0	3
Tnnt1	troponin T1, skeletal, slow	3.77719	0.00956991	572	49	22	28
Adprhl1	ADP-ribosylhydrolase like 1	3.76245	0.00290927	49.5	13.5	3	2.5
Pkhd1l1	polycystic kidney and hepatic disease 1-like 1	3.73533	0.00265419	183	15	9	7
Scn2b	sodium channel, voltage-gated, type II, beta	3.70198	0.0529877	26	10	1	2
Otop2	otopetrin 2	3.68643	0.0316341	17	8	2	0
Cdnf	cerebral dopamine neurotrophic factor	3.67757	0.0874763	20	5	2	0
Chodl	chondrolectin	3.6144	0.0512391	27	8	2	1
Sec14l5	SEC14-like lipid binding 5	3.61048	0.00863884	55	15	4	2
Mgat4c	MGAT4 family, member C	3.53784	0.0081593	18	39	2	3
Gfra1	glial cell line derived neurotrophic factor family receptor alpha 1	3.50764	1.18e-10	781.5	278	41	60
Necab1	N-terminal EF-hand calcium binding protein 1	3.46688	0.00657158	21	63	1	7
Krt2	keratin 2	3.4289	0.0723042	15	6	2	0
NEURL1	-	3.39091	0.034969	32	7	2	2
Tnnc1	troponin C, cardiac/slow skeletal	3.33125	0.000397144	440	44	27	25
Fam163a	family with sequence similarity 163, member A	3.28852	0.0269266	13	34	1	4
Zim1	zinc finger, imprinted 1	3.28496	0.000114213	135	58	5	17
Dpp6	dipeptidylpeptidase 6	3.24963	2.45e-12	159	166.5	19	16
Cldn11	claudin 11	3.20273	0.0243069	101	8	6	7
Mb	myoglobin	3.19702	0.00494754	6158	984	391	457
Sfrp5	secreted frizzled-related sequence protein 5	3.1923	3.22e-05	64	353	20	25
Cnr1	cannabinoid receptor 1 (brain)	3.08466	0.00254793	31	116	4	14
Eps8l1	EPS8-like 1	3.07004	0.0398231	13	11	1	2
Plet1	placenta expressed transcript 1	3.0599	0.0356166	108	1484	84	101
Art5	ADP-ribosyltransferase 5	3.05531	0.0014495	100.5	23.5	8.5	8.5
Dupd1	dual specificity phosphatase and pro isomerase domain containing 1	3.05387	0.0182817	45	28	0	10
Tpsab1	tryptase alpha/beta 1	3.04435	8.71e-09	583	253	37	74
RGD1565323	-	3.04308	0.00295023	101.33	28	7	10
Slc19a3	solute carrier family 19, member 3	3.02184	0.00124599	56	53	6	8
Aqp4	aquaporin 4	3.01318	0.00607454	206	24	15	16
MURC	-	3.01059	0.000189013	99	39	10	8
Ky	kyphoscoliosis peptidase	2.98695	4.8e-07	963	272	87	78
Foxp2	forkhead box P2	2.98579	0.00547509	34	38	7	2
Lbx1	ladybird homeobox 1	2.95157	0.0833686	22	8	3	1
Mybpc1	myosin binding protein C, slow-type	2.91713	4.91e-10	4182	1403	373	417
Myoc	myocilin	2.8972	0.0497953	1526	149	102	148
Adh1	alcohol dehydrogenase 1 (class I)	2.86652	0.00222544	56	27	6	6
Matn4	matrilin 4	2.84552	0.000823905	44	73.5	5.5	11
Smyd1	SET and MYND domain containing 1	2.84257	5.7e-07	337	138	35	35
Tnmd	tenomodulin	2.83354	3.96e-08	225	141	30	23
Myh2	myosin, heavy polypeptide 2, skeletal muscle, adult	2.82294	0.00179798	5801.98	1499.99	568.54	526.91
Rbm24	RNA binding motif protein 24	2.81244	2.04e-05	125	63	15	13
Aldh1a1	aldehyde dehydrogenase family 1, subfamily A1	2.80636	1.09e-06	569	184.5	55	60
Txlnb	taxilin beta	2.77741	4.9e-06	827	241	90	74
Dok7	docking protein 7	2.76941	0.0273284	47	15	3	7
Scn4b	sodium channel, type IV, beta	2.76402	9.08e-05	472	115	48	44
Ckmt2	creatine kinase, mitochondrial 2	2.75772	7.34e-07	707	281	45	118
Neu2	neuraminidase 2	2.74273	0.000397144	555	102	55	50
Apba2	amyloid beta (A4) precursor protein-binding, family A, member 2	2.7421	0.0841875	31	15	5	2
LOC100910189	-	2.73383	0.00378352	209	49	27	13
Gdf10	growth differentiation factor 10	2.73026	6.04e-05	513	162	36	77
Myom2	myomesin 2	2.72245	0.000666856	3294	978	310	389
Nt5c1a	5'-nucleotidase, cytosolic IA	2.7205	0.00702303	62	23	5	9
Sctr	secretin receptor	2.7182	0.000144127	93	515	37	55
Pak3	p21 (RAC1) activated kinase 3	2.70787	0.0826454	9	24	3	2
Trdn	triadin	2.69981	1.65e-08	3122	1055	320	368
Cav3	caveolin 3	2.69825	2.55e-07	488	185	50	61
Cilp	cartilage intermediate layer protein, nucleotide pyrophosphohydrolase	2.68469	6.31e-06	940	331	128	75
Myh1	myosin, heavy polypeptide 1, skeletal muscle, adult	2.67585	0.00732714	20915.5	6594.66	3025.5	1321.25
Cox6a2	cytochrome c oxidase subunit 6A2	2.67425	2.03e-08	2322	797	218	312
Asb16	ankyrin repeat and SOCS box-containing 16	2.6719	0.0131577	87	26	9	10
RGD1305645	-	2.67014	3.73e-09	161	228	37	24
Eya4	EYA transcriptional coactivator and phosphatase 4	2.66215	0.0321072	48	16	4	7
Cox8b	cytochrome c oxidase subunit 8B	2.65597	5.32e-05	889	213	76	116
Itgb6	integrin beta 6	2.6503	0.00106179	85	45	15	6
Scube1	signal peptide, CUB domain, EGF-like 1	2.64004	0.097287	39	11	2	7
Smtnl1	smoothelin-like 1	2.63764	0.00109164	411	95	55	29
Myoz1	myozenin 1	2.63724	5.28e-11	5935	2469	635	812
LOC298139	-	2.63584	0.00175253	139	45	18	13
LOC102550325	-	2.62673	0.0109066	56	26	7	7
Bmp5	bone morphogenetic protein 5	2.62177	0.0425886	210	29	6	40
Hrc	histidine rich calcium binding protein	2.61238	0.00937086	1806	418	202	185
Dusp26	dual specificity phosphatase 26 (putative)	2.6101	0.00164882	96	44	13	11
Myom1	myomesin 1	2.60913	6.62e-10	1476	642	171	198
Dcx	doublecortin	2.60419	0.000485548	86	60	7	19
Klhl31	kelch-like 31	2.5948	2.09e-07	1160	412	119	162
Hhatl	hedgehog acyltransferase-like	2.59283	1.95e-05	716	241	100	64
Prkaa2	protein kinase, AMP-activated, alpha 2 catalytic subunit	2.5851	0.000252586	207	73	27	22
Slc15a1	solute carrier family 15 (oligopeptide transporter), member 1	2.58263	0.0293378	44	13	6	4
Smpx	small muscle protein, X-linked	2.58113	1.63e-07	298	154	41	38
Tcap	titin-cap	2.58082	0.00157671	413	79	42	47
Atp2a1	ATPase, Ca++ transporting, cardiac muscle, fast twitch 1	2.57785	0.00200122	42889	10973	4876.5	4737
Slc8a3	solute carrier family 8 (sodium/calcium exchanger), member 3	2.57564	0.027724	103	15	8	14
Art1	ADP-ribosyltransferase 1	2.57559	0.000183161	305.5	91.5	39.5	30.5
Pgam2	phosphoglycerate mutase 2	2.56565	1.31e-10	4754	2049	491	753
Cacng1	calcium channel, voltage-dependent, gamma subunit 1	2.56227	7.53e-07	606	228	65	87
Eno3	enolase 3, beta muscle	2.55582	1.31e-10	16493	6932	1689	2633
LOC683313	-	2.55446	0.0723233	95	4	11	7
Fmo3	flavin containing monooxygenase 3	2.54683	1.31e-10	935	513	108	157
Fam180a	family with sequence similarity 180, member A	2.54675	1.13e-07	183	241	22	55
Tmod4	tropomodulin 4	2.54433	2.93e-08	1962	732	208	291
Myot	myotilin	2.54393	1.89e-11	1840.72	904.69	212.5	291.6
Myl1	myosin, light polypeptide 1	2.54209	1.18e-11	27946	12567	2960	4566
Tfcp2l1	transcription factor CP2-like 1	2.53601	0.00151405	62	48	8	12
Tnni2	troponin I, skeletal, fast 2	2.5348	2.59e-10	16335	6780	1672	2663
Fam184b	family with sequence similarity 184, member B	2.53454	0.0582954	20	12	1	5
Casq1	calsequestrin 1	2.5326	4.75e-10	12172	4964	1259	1956
Snurf	SNRPN upstream reading frame	2.53022	0.0159612	89.5	26	8.5	14.5
Snrpn	small nuclear ribonucleoprotein N	2.53022	0.0159612	90.5	26	8.5	14.5
Sypl2	synaptophysin-like 2	2.52927	3.45e-08	1072	427	120	159
Tnnc2	troponin C2, fast	2.52442	7.86e-11	23048	10255	2302	4012.5
Fsd2	fibronectin type III and SPRY domain containing 2	2.52386	0.000901748	227	63	22	33
Dhrs7c	dehydrogenase/reductase (SDR family) member 7C	2.52023	1.06e-06	740	267	78	112
Mettl21c	methyltransferase like 21C	2.51477	0.0273954	26.5	55	3	11.5
Mylpf	myosin light chain, phosphorylatable, fast skeletal muscle	2.5122	2.45e-10	44649	19943	4213	8225
Apobec2	apolipoprotein B mRNA editing enzyme, catalytic polypeptide 2	2.50829	1.18e-10	2502	1285	374	316
Kcna7	potassium voltage-gated channel, shaker-related subfamily, member 7	2.50786	0.0156148	132	24	17	12
Fmo2	flavin containing monooxygenase 2	2.50349	0.00265864	282	81	35	33
FCRL2	-	2.49819	5.5e-26	2790	3909	412	840
Csrp3	cysteine and glycine-rich protein 3	2.49363	1.07e-11	354	290	70	46
Pvalb	parvalbumin	2.4914	2.26e-11	13313	6452	1349	2488
Adam11	a disintegrin and metallopeptidase domain 11	2.48885	0.0456202	50	15	8	4
Tnnt3	troponin T3, skeletal, fast	2.48085	4.13e-10	33416	13753	3881.5	5200.75
Actn3	actinin alpha 3	2.4804	0.000532672	19502.5	6323	2416	2507.5
Acsl6	acyl-CoA synthetase long-chain family member 6	2.47447	0.00149416	92	54	6	23
Sh3bgr	SH3-binding domain glutamic acid-rich protein	2.46081	7.03e-08	971.5	414.5	105	168.5
Kcnj11	potassium inwardly rectifying channel, subfamily J, member 11	2.4568	0.00235182	189	52	27	19
Angptl1	angiopoietin-like 1	2.45326	1.3e-10	1831.5	991.5	190	372
Mypn	myopalladin	2.45258	0.000265781	661	188	98	63
Myh4	myosin, heavy polypeptide 4, skeletal muscle	2.45026	4.16e-09	61726	24864.9	6308.54	11031
Mybpc2	myosin binding protein C, fast-type	2.44375	2.43e-09	9677	3922	1185	1492
Cpxm2	carboxypeptidase X 2 (M14 family)	2.44105	3.28e-17	1409	1148	258	224
LOC690918	-	2.43947	0.00268643	36	85	13	9
Tenm3	teneurin transmembrane protein 3	2.43922	0.0122426	114	40	20	9
Ppargc1a	peroxisome proliferative activated receptor, gamma, coactivator 1 alpha	2.43877	0.0920217	32	12	2	7
Popdc3	popeye domain containing 3	2.43779	0.00137657	64	38	8	12
Trim54	tripartite motif-containing 54	2.4297	4.29e-06	454	188	66	59
Pdlim3	PDZ and LIM domain 3	2.42837	1.53e-13	933	574	126	171
Hfe2	-	2.42605	7.33e-07	1204	432	145	182
Kcnc4	potassium voltage gated channel, Shaw-related subfamily, member 4	2.42602	0.0478923	174	15	20	18
Sec31b	Sec31 homolog B (S. cerevisiae)	2.42518	0.00496863	134	41	16	19
Ldb3	LIM domain binding 3	2.42146	4.26e-12	4890	2474	644	819
Nrap	nebulin-related anchoring protein	2.41943	6.44e-07	1847	663.5	252	244.5
Asb12	ankyrin repeat and SOCS box-containing 12	2.41843	0.000488043	185	71	24	27
Camk2a	calcium/calmodulin-dependent protein kinase II alpha	2.41569	0.00061485	150	61	20	22
Trim63	tripartite motif-containing 63	2.41522	0.000224148	255	88	31	38
Pygm	muscle glycogen phosphorylase	2.40626	0.00075432	14566	4857	1950	1934
Rpl3l	ribosomal protein L3-like	2.40339	2.94e-06	746	276	93	114
Ankrd23	ankyrin repeat domain 23	2.39973	8.5e-10	2037	950	262	343
Asb11	ankyrin repeat and SOCS box-containing 11	2.39543	0.00218076	291	77	40	34
Myoz2	myozenin 2	2.39273	0.0156252	266	38	37	24
Wfdc1	WAP four-disulfide core domain 1	2.38608	2.58e-05	835	1147	273	87
Mum1l1	-	2.37703	0.0219281	39	37	8	7
Eef1a2	eukaryotic translation elongation factor 1 alpha 2	2.37615	0.0100349	1338	348	152	201
Slc2a4	solute carrier family 2 (facilitated glucose transporter), member 4	2.37601	1.63e-06	1033	402	143	150
Cacna1s	calcium channel, voltage-dependent, L type, alpha 1S subunit	2.3758	3.28e-05	1081	315	106	191
Stac3	SH3 and cysteine rich domain 3	2.36993	3.18e-06	446	197	50	85
Ampd1	adenosine monophosphate deaminase 1	2.3697	0.00303548	3715	1159	468	544
Mrln	myoregulin	2.3687	0.000192617	101	59	13	20
Prkag3	protein kinase, AMP-activated, gamma 3 non-catalytic subunit	2.36293	0.00332541	375	96	63	31
Bves	blood vessel epicardial substance	2.36161	0.0187194	71	24	8	12
Vsnl1	visinin-like 1	2.34535	0.0149405	22	75	9	10
Actn2	actinin alpha 2	2.3424	2.92e-06	1934	666	287	252
Xirp2	xin actin-binding repeat containing 2	2.3378	4.65e-08	4604	1880	525	873
Hoxd10	homeobox D10	2.33721	0.0644032	33	22	2	10
Hspb6	heat shock protein, alpha-crystallin-related, B6	2.33497	5.62e-15	3097	1907	415	647
Mn1	meningioma 1	2.33124	0.000373896	193	87	19	42
Tmem38a	transmembrane protein 38A	2.33038	1.65e-05	1849	580	271	238
Cma1	chymase 1, mast cell	2.32859	5.44e-08	3066	1581.5	295	730.5
Mylk2	myosin, light polypeptide kinase 2, skeletal muscle	2.32285	7.4e-05	1538	450	232	185
Hspb7	heat shock protein family, member 7 (cardiovascular)	2.32241	5.62e-15	346	593	73	121
Cap2	CAP, adenylate cyclase-associated protein, 2 (yeast)	2.32203	0.000828451	149	59	22	22
Myadml2	myeloid-associated differentiation marker-like 2	2.29795	0.0124439	53	33	5	14
Lmod2	leiomodin 2 (cardiac)	2.29364	0.000745071	510	139	75	65
Rgn	regucalcin	2.29244	0.0777818	30	19	2	9
Fitm1	fat storage-inducing transmembrane protein 1	2.29041	0.000794003	225	81	22	47
Eln	elastin	2.28983	2.6e-58	11051	11831	1936	2972
Lrrc2	leucine rich repeat containing 2	2.28068	0.00644202	62	38	8	14
Col8a1	collagen, type VIII, alpha 1	2.27801	2.08e-22	1354	1917	256	449
Jph1	junctophilin 1	2.26854	0.00098974	197	72	26	34
Sgca	sarcoglycan, alpha (dystrophin-associated glycoprotein)	2.2666	4.75e-05	457	168	67	71
Itgb1bp2	integrin beta 1 binding protein 2	2.2643	1.95e-08	392	229	55	83
Acta1	actin, alpha 1, skeletal muscle	2.26221	0.000703402	66151	23514	8312	11960
Trim72	tripartite motif-containing 72	2.26122	5.57e-05	611	201	82	100
Ank1	ankyrin 1, erythroid	2.26012	0.000245232	250	101	28	52
H19	H19, imprinted maternally expressed transcript	2.2505	0.0146507	39134.5	8494.5	4649.5	6291.5
Ckm	creatine kinase, muscle	2.24758	0.00562196	30914	8412	3711	5332
Jsrp1	junctional sarcoplasmic reticulum protein 1	2.24493	8.61e-05	521	187	80	78
Yipf7	Yip1 domain family, member 7	2.24237	0.00929267	116	56.5	7	34
Pls1	plastin 1 (I-isoform)	2.24191	0.0299714	31	140	7	31
Phkg1	phosphorylase kinase gamma 1	2.23939	9.34e-05	291.5	125.5	43.5	50
Phyhip	phytanoyl-CoA hydroxylase interacting protein	2.23455	0.0866304	43	14	11	1
Slc15a2	solute carrier family 15 (H+/peptide transporter), member 2	2.23453	4.58e-08	187	390	56	68
Atp1b4	ATPase, (Na+)/K+ transporting, beta 4 polypeptide	2.23156	0.0486088	42	16	7	6
Ppp1r3a	protein phosphatase 1, regulatory subunit 3A	2.23139	0.00011057	936	302	147	131
Smtnl2	smoothelin-like 2	2.2237	5.66e-05	369	183	74	47
Casq2	calsequestrin 2	2.22123	7.52e-05	369	139	47	71
P2rx6	purinergic receptor P2X, ligand-gated ion channel, 6	2.21933	0.070664	49	19	10	5
Kprp	keratinocyte expressed, proline-rich	2.2116	0.0578788	38	41	16	0
Unc45b	unc-45 myosin chaperone B	2.20841	0.00106769	345	111	48	58
Slitrk6	SLIT and NTRK-like family, member 6	2.20585	0.000503824	75	175	23	32
Asb10	ankyrin repeat and SOCS box-containing 10	2.20136	0.0896691	80	16	13	9
Mir675	microRNA 675	2.20113	0.0458758	1991.5	413.5	237.5	336.5
Hsd11b2	hydroxysteroid 11-beta dehydrogenase 2	2.18165	0.0242544	39	31	8	8
Nalcn	sodium leak channel, non-selective	2.18021	0.0034804	53	70	12	16
Perm1	PPARGC1 and ESRR induced regulator, muscle 1	2.17585	0.0131886	102	36	18	14
Myod1	myogenic differentiation 1	2.17096	0.0287532	60	21	10	9
MCPT1L1	-	2.16828	0.0038375	7478	4333	635	2329
Adh7	alcohol dehydrogenase 7 (class IV), mu or sigma polypeptide	2.16798	3.38e-07	136	141	28	36
Cryab	crystallin, alpha B	2.16729	1.57e-09	1377	771	195	319.5
Mlf1	myeloid leukemia factor 1	2.16718	1.25e-08	1941.5	970	308	381
Klhl41	kelch-like 41	2.15195	3.17e-06	2204	959	420	316
Slc38a3	solute carrier family 38, member 3	2.15036	0.0366261	154	36	34	9
Megf6	multiple EGF-like-domains 6	2.14666	5.33e-07	1030.33	491.67	141.17	231
Ppp1r3c	protein phosphatase 1, regulatory subunit 3C	2.14548	3.19e-07	1282	752	277	192
Cpa3	carboxypeptidase A3, mast cell	2.13598	0.0103831	3432	2166	261	1185
Pfkm	phosphofructokinase, muscle	2.12737	0.0108671	4317	1322.5	600	798
Abra	actin-binding Rho activating protein	2.11868	0.00150966	241	90	27	57
Ms4a2	membrane-spanning 4-domains, subfamily A, member 2	2.11502	0.00062759	312	139	34	81
Synm	synemin, intermediate filament protein	2.11481	4.73e-06	1455	579	209	298
Cacng6	calcium channel, voltage-dependent, gamma subunit 6	2.11458	0.041566	53	24	8	11
Ppp1r1a	protein phosphatase 1, regulatory inhibitor subunit 1A	2.10912	0.000264717	354	154	43	86
Myf6	myogenic factor 6	2.10561	0.000330198	198	91	34	37
Mfap4	microfibrillar-associated protein 4	2.10411	3.44e-17	17008	16865	2660	5815
Atp1a2	ATPase, Na+/K+ transporting, alpha 2 polypeptide	2.10255	0.0164287	2578.5	749.5	381.5	452
Tpsb2	tryptase beta 2	2.10187	2.55e-06	803	420	107	203
F10	coagulation factor X	2.09913	0.00534	58	244	35	34
Pkia	protein kinase inhibitor, alpha	2.09049	4.37e-10	1094	700	165	288
Me3	malic enzyme 3, NADP(+)-dependent, mitochondrial	2.07782	0.000299819	111	113	15	42
Pi15	peptidase inhibitor 15	2.07567	2.95e-05	186	406	47	99
Cd72	CD72 antigen	2.07453	2.12e-13	283	353	61.5	95
Pcdh20	protocadherin 20	2.06338	5.72e-13	682	1255	186	291
Clcn1	chloride channel, voltage-sensitive 1	2.06073	0.0148025	172	47	28	28
Chrnb1	cholinergic receptor, nicotinic, beta polypeptide 1 (muscle)	2.0565	0.0185484	87	34	19	11
Clec11a	C-type lectin domain family 11, member a	2.05555	2.45e-12	1005	724	201	234
Asb14	ankyrin repeat and SOCS box-containing 14	2.04794	0.00413486	89	48	16	19
Slc45a3	solute carrier family 45, member 3	2.0399	0.00778928	153	56	22	33
RGD1307461	-	2.03922	0.00576484	120	54	25	19
Ache	acetylcholinesterase	2.03721	0.0167348	217	78	50	23
Synpo2l	synaptopodin 2-like	2.02863	0.0085326	379	81	60	61
Rprm	reprimo, TP53 dependent G2 arrest mediator candidate	2.02743	0.0601523	18	48	9	7
RGD1310507	-	2.01884	8.31e-08	350	368	55	135
Igf2	insulin-like growth factor 2	2.01872	0.00123287	607	171	108	95
Slc6a4	solute carrier family 6 (neurotransmitter transporter, serotonin), member 4	2.00741	0.000134107	170	106	34	38
Nrk	Nik related kinase	1.99673	0.00022294	88	143	27	32
Tmem182	transmembrane protein 182	1.99302	0.000160468	340	157	67	64
Car3	carbonic anhydrase 3	1.96174	0.00997541	21762	11132	2255	7249
Sostdc1	sclerostin domain containing 1	1.95839	0.0982344	43	12	8	7
Klhl4	kelch-like 4	1.95449	0.0608868	133	32	13	35
Capn3	calpain 3	1.94899	6.96e-05	419	197	75	95
Cblc	Casitas B-lineage lymphoma c	1.94709	0.0638492	34	18	8	6
Alpk3	alpha-kinase 3	1.9306	0.00368974	450	126	77	85
Rtn2	reticulon 2 (Z-band associated protein)	1.92861	0.000154089	1252	459	226	253
Lsamp	limbic system-associated membrane protein	1.92415	0.0259472	103	45	21	20
Fhl1	four and a half LIM domains 1	1.91578	8.81e-11	8448	5134	1759	2024
Tmod2	tropomodulin 2	1.91258	4.89e-05	200	302	42	99
LOC100910996	-	1.91181	0.0254606	42	51	14	11
Cytl1	cytokine-like 1	1.89969	1.89e-07	332	242	78	82
Fbp2	fructose bisphosphatase 2	1.89287	0.060602	89	23	17	15
Pde4dip	phosphodiesterase 4D interacting protein (myomegalin)	1.88836	0.000143304	4781	1769.5	1017	830.5
Dusp13	dual specificity phosphatase 13	1.88684	0.00132697	323	129	61	69
Tceal7	transcription elongation factor A (SII)-like 7	1.87253	0.000192617	323	148	69	66
Mstn	myostatin	1.8686	0.000817408	204	142	55	42
Omd	osteomodulin	1.86512	2.81e-13	691	964	164	313
Rbfox1	RNA binding protein, fox-1 homolog (C. elegans) 1	1.86385	0.0113996	324	110	76	47
Kcnj12	potassium inwardly-rectifying channel, subfamily J, member 12	1.85621	0.065372	92	29	20	15
Aspn	asporin	1.84698	1.52e-18	6239	5757	1750.67	1659.33
Dlk1	delta like non-canonical Notch ligand 1	1.84573	0.00194938	310	135	63	68
Pcp4l1	Purkinje cell protein 4-like 1	1.84387	0.0792312	49	25	9	13
Asb5	ankyrin repeat and SOCs box-containing 5	1.84287	0.00322151	227	137	68	34
Atp1b2	ATPase, Na+/K+ transporting, beta 2 polypeptide	1.83277	0.000359399	873	353	133	244
Ppp1r27	protein phosphatase 1, regulatory subunit 27	1.82129	0.00480487	144	72	24	42
Map7d3	-	1.81688	0.00109128	80	95	19	33
Mustn1	musculoskeletal, embryonic nuclear protein 1	1.81637	1.7e-08	395	293	86	120
Fxyd6	FXYD domain-containing ion transport regulator 6	1.80553	0.00413486	383	146	80	80
Ccl22	chemokine (C-C motif) ligand 22	1.80457	3.55e-06	429	1045	159	274
LTB4R	-	1.80345	0.0469595	33	141	20	30
ADCK3	-	1.80002	0.000557532	1441	537	214	412
Bmp4	bone morphogenetic protein 4	1.79966	2.34e-05	362.67	216	81.17	94
Spock2	sparc/osteonectin, cwcv and kazal-like domains proteoglycan 2	1.79737	0.0450432	128	74	41	17
NOV	-	1.79457	4.69e-05	1723	3400	386	1193
Hrasls	-	1.79428	0.0157452	141	60	31	30
Tmprss4	transmembrane protease, serine 4	1.79332	0.097286	43	18	7	12
Dusp27	dual specificity phosphatase 27 (putative)	1.79323	0.0171811	212	77	53	33
Extl1	exostosin-like glycosyltransferase 1	1.79272	0.0677822	31	18	6	9
Chrdl1	chordin-like 1	1.78745	1.49e-05	1204	1638	211	682
Fam160a1	family with sequence similarity 160, member A1	1.78598	0.0132674	83	80.5	27	21
Sptb	spectrin beta, erythrocytic	1.78162	0.0124439	360	103	55	93
Dnase1l3	deoxyribonuclease 1-like 3	1.77644	0.00413486	286	797	74	262
LOC259245	-	1.77596	0.000681212	332	214.19	47.61	126.87
Samd10	sterile alpha motif domain containing 10	1.77241	0.0445526	39	31	12	9
OBP3	-	1.76016	0.000119524	639.59	356.8	104.54	216
Nkd1	naked cuticle 1	1.75946	0.00452128	67	63	23	16
RGD1566134	-	1.75905	0.000221964	495.8	276.77	80.9	167.71
Srpk3	serine/arginine-rich protein specific kinase 3	1.75889	0.0104723	211	79	40	52
Mup5	major urinary protein 5	1.75547	0.000884643	373.17	234.36	53.44	144.87
Pln	phospholamban	1.75255	0.0758993	50	33	16	9
Sema3a	sema domain, immunoglobulin domain (Ig), short basic domain, secreted, (semaphorin) 3A	1.75058	0.0007703	94	110	31	31
Slc25a23	solute carrier family 25 (mitochondrial carrier; phosphate carrier), member 23	1.7488	0.0478923	86	36	16	23
LPPR5	-	1.74807	0.0238895	93	481	56	118
Stbd1	starch binding domain 1	1.74455	6.36e-05	317	204	64	102
Tph1	tryptophan hydroxylase 1	1.73816	0.0245812	183	99	19	76
LOC259244	-	1.7369	0.000317236	398.88	228.8	66.55	137.72
Scn7a	sodium channel, voltage-gated, type VII, alpha	1.7318	0.0460207	118	43	27	24
Gpd1	glycerol-3-phosphate dehydrogenase 1 (soluble)	1.72007	0.0675901	2558	933	300	900
Ntrk2	neurotrophic tyrosine kinase, receptor, type 2	1.71822	0.000456479	1721	1125	218	749
Lrrc14b	leucine rich repeat containing 14B	1.71548	0.0272985	246	76	53	51
Htr1b	5-hydroxytryptamine (serotonin) receptor 1B	1.71132	0.0450432	41	146	17	42
Tmem246	transmembrane protein 246	1.71004	0.0334309	47	47	7	24
Klhl29	kelch-like 29	1.70683	0.000578805	109	142	31	49
Dmtn	dematin actin binding protein	1.70309	0.040772	100	42	23	23
Klhl40	kelch-like 40	1.70164	0.0814376	371	99	109	36
Fmod	fibromodulin	1.69272	0.00032391	256	677	132	157
Cldn4	claudin 4	1.69074	0.0473034	162	500	150	38
LOC259246	-	1.68785	0.0474532	104.77	52.88	15.42	39.42
Cmbl	carboxymethylenebutenolidase-like (Pseudomonas)	1.68698	0.00801394	223	102	38	72
Coro6	coronin 6	1.68092	0.0237337	214	73	51	43
Tpm1	tropomyosin 1, alpha	1.68054	1.07e-08	31571	19158	7626	9039
Penk	preproenkephalin	1.66863	0.00308512	184	317	39	130
Ndrg2	N-myc downstream regulated gene 2	1.66271	3.06e-06	2958	1566	656	866
Tpm2	tropomyosin 2, beta	1.66024	4.66e-05	22940	11415	6233	4996
Cdkl1	cyclin-dependent kinase-like 1 (CDC2-related kinase)	1.65579	0.0478923	40	41	10	17
Map2k6	mitogen-activated protein kinase kinase 6	1.6527	5.1e-07	232	279	59	112
Kcnj15	potassium inwardly-rectifying channel, subfamily J, member 15	1.6523	0.0515984	38	78	14	24
Sult1a1	sulfotransferase family 1A, phenol-preferring, member 1	1.64863	7.28e-14	1128	960	302.5	395
Paqr6	progestin and adipoQ receptor family member VI	1.64762	0.000205752	116	115	37	39
Camk2b	calcium/calmodulin-dependent protein kinase II, beta	1.63577	0.00125751	359	173	89	91
LOC298116	-	1.63192	0.0592534	101.27	50.88	14.92	39.17
Tspan11	tetraspanin 11	1.61245	0.00105404	1962	752	411	544
Cd5l	CD5 antigen-like	1.61171	1.7e-10	1726	2530	489	978
C1qtnf3	C1q and tumor necrosis factor related protein 3	1.61085	6.31e-06	1796	1751	712	443
Tlr11	toll-like receptor 11	1.60743	0.0342964	53	162	26	46
Gsta4	glutathione S-transferase, alpha 4	1.60354	0.0380126	77	41	14	28
Macrod1	mono-ADP ribosylhydrolase 1	1.60328	0.0226918	290	90	55	81
SEPW1	-	1.59908	9.28e-24	3293	3122	983	1218
Gstm7	glutathione S-transferase, mu 7	1.59033	6.35e-05	127.5	136.75	35.5	56.5
Tnfrsf19	tumor necrosis factor receptor superfamily, member 19	1.58864	0.0457482	33	53	20	8
Sapcd1	suppressor APC domain containing 1	1.58768	0.000208867	189	394.5	73	127.25
Phka1	phosphorylase kinase alpha 1	1.58667	7.28e-05	1131	592	246	370
C1qtnf9	C1q and tumor necrosis factor related protein 9	1.58123	0.000372565	138	209	65	51
Mrgprx2	MAS-related GPR, member X2	1.57315	0.0852734	29	78	17	19
Itgbl1	integrin, beta-like 1	1.57307	4.83e-10	5228	8817	1723	3208
Apod	apolipoprotein D	1.57039	0.00455815	589	225	133	160
Hspb2	heat shock protein 2	1.56573	0.00322629	106	91	28	42.5
Cpt1b	carnitine palmitoyltransferase 1b, muscle	1.56071	0.0139969	375	143	95	90
Car14	carbonic anhydrase 14	1.5579	0.0064101	201	103	51	58
Lynx1	Ly6/neurotoxin 1	1.5559	0.0433065	93	38	19	29
Ntn1	netrin 1	1.55154	0.0434349	65	53	19	23
Abcb9	ATP-binding cassette, sub-family B (MDR/TAP), member 9	1.54801	0.0848629	27	37	13	9
Cand2	cullin-associated and neddylation-dissociated 2 (putative)	1.53563	0.00668138	477	200	120	127
Dmd	dystrophin, muscular dystrophy	1.52844	4.89e-05	240	187	73	81
Cacnb1	calcium channel, voltage-dependent, beta 1 subunit	1.51248	0.0515311	335	104	98	61
Ccdc80	coiled-coil domain containing 80	1.51142	9.17e-08	48402	94066.5	18378	33515
Fcer1a	Fc receptor, IgE, high affinity I, alpha polypeptide	1.51013	0.0296907	107	92	15	62
Slc38a4	solute carrier family 38, member 4	1.50312	0.0052905	188	101	48	60
Epha3	Eph receptor A3	1.49708	0.0206052	199	776	118	235
LOC500300	-	1.49618	0.0226918	159	659	109	184
Scn3a	sodium channel, voltage-gated, type III, alpha	1.48999	0.01155	240	125.75	70	65.75
Gcgr	glucagon receptor	1.48792	0.0185838	141	79	24	62
Slc2a5	solute carrier family 2 (facilitated glucose transporter), member 5	1.48478	0.0203867	77	108	25	44
Asb2	ankyrin repeat and SOCS box-containing 2	1.48424	0.0782259	192	55	47	47
Gpt2	glutamic pyruvate transaminase (alanine aminotransferase) 2	1.48418	0.00295023	229	152	61	83
Fmo1	flavin containing monooxygenase 1	1.48214	0.0669112	419	165	50	188
Synpo2	synaptopodin 2	1.48083	0.00179798	699	325	191	195
Cmah	cytidine monophospho-N-acetylneuraminic acid hydroxylase	1.4757	0.00106179	394	696	108	310
Nexn	nexilin	1.47336	0.000394759	603	375	197	166
Agl	amylo-1,6-glucosidase, 4-alpha-glucanotransferase	1.47034	0.000517512	3350	1522	795	1092
RT1-DB1	-	1.47014	1.8e-10	1763	2807	639	1076
Calml4	calmodulin-like 4	1.4661	0.000854681	167	266	51	114
Cck	cholecystokinin	1.4651	0.0566289	288	95	67	82
Crhr2	corticotropin releasing hormone receptor 2	1.46239	0.0800372	70	36	17	24
Tspan8	tetraspanin 8	1.46057	0.000107112	713	421	181	258
G0s2	G0/G1 switch gene 2	1.45948	0.00252869	270	468	78	207
Lrrc39	leucine rich repeat containing 39	1.45528	6.04e-05	286.5	229.5	95	100
Slc29a1	solute carrier family 29 (nucleoside transporters), member 1	1.4547	1.01e-13	527	606	181	248
Ism1	isthmin 1, angiogenesis inhibitor	1.45204	0.0295209	63	67	18	32
Acyp2	acylphosphatase 2, muscle type	1.45064	0.00577584	255	150	64	94
Mest	mesoderm specific transcript	1.44979	0.00166311	269	177	84	86
Mup4	major urinary protein 4	1.44292	0.0866304	144.27	66.13	22.38	63.58
Gsn	gelsolin	1.43939	2.86e-09	84840	72787	21453	40895
Islr	immunoglobulin superfamily containing leucine-rich repeat	1.43599	1.64e-08	1191	1711	381	748
Shisa4	shisa family member 4	1.43349	0.0017866	217	160	75	69
Gpr155	G protein-coupled receptor 155	1.42509	6.04e-05	270	519	118	184
DDIT4L2	-	1.42295	0.085541	241	79	73	51
Tst	thiosulfate sulfurtransferase, mitochondrial	1.4189	0.0108901	221	129	43	100
Smoc2	SPARC related modular calcium binding 2	1.4158	0.0009979	2168	1114	685	591
Rxrg	retinoid X receptor gamma	1.41145	0.00332541	163	131	45	72
Klra1	killer cell lectin-like receptor, subfamily A, member 1	1.41088	0.00688825	122	284	61	95
RT1-BA	-	1.40018	1.74e-10	4263	7101	1744	2704
Fgf13	fibroblast growth factor 13	1.39749	0.00700567	75	86	29	34
Vwa7	von Willebrand factor A domain containing 7	1.39587	0.000246436	156	266	62	103.75
Gpx3	glutathione peroxidase 3	1.39049	2.63e-15	32895	30277	9905	15559
LOC100910558	-	1.38956	0.000494365	196	175	50	101
Cpe	carboxypeptidase E	1.38058	1.75e-07	784	619	258	304
RT1-DOA	-	1.37487	0.0436378	70	79	19	42
Lamc3	laminin gamma 3	1.37477	0.0307996	59.5	71	24	28
Tspan18	tetraspanin 18	1.37469	2.46e-08	856	822	248	438
PLAC9	-	1.37439	2.71e-06	535	657	256	206
Atp1b1	ATPase, Na+/K+ transporting, beta 1 polypeptide	1.36705	0.00100235	2429.5	6832.5	1343	2329.5
Fads2	fatty acid desaturase 2	1.36399	4.17e-05	277	479	118	185
Abcc9	ATP-binding cassette, sub-family C (CFTR/MRP), member 9	1.36391	1.18e-05	1896	2163	492	1205
Pparg	peroxisome proliferator activated receptor gamma	1.35885	0.00702303	400	789	124	370
Pi16	peptidase inhibitor 16	1.35149	5.96e-06	4110	8299	2428	2421
Lmod1	leiomodin 1 (smooth muscle)	1.34363	0.0410415	350	160	121	86
Shroom2	shroom family member 2	1.3381	0.0109618	75	128	41	40
Retnlg	resistin like gamma	1.33618	0.000876534	234	259	65	143
Tmod1	tropomodulin 1	1.33541	0.000559532	694.5	405	203	258.5
SDPR	-	1.32981	2.75e-05	767	874	211	488
Nrg1	neuregulin 1	1.32899	0.0903263	29	49.5	15	17
Robo2	roundabout guidance receptor 2	1.32774	3.16e-06	282	335	116	137
Cgnl1	cingulin-like 1	1.32183	1.33e-07	482	456	153	242
Prss12	protease, serine 12 neurotrypsin (motopsin)	1.31896	0.086339	68	53	26	24
Cldn5	claudin 5	1.31477	0.0442041	544	183	137	178
KIAA0408	-	1.31441	0.0894451	70	43	16	33
Cd74	CD74 antigen (invariant polypeptide of major histocompatibility complex, class II antigen-associated)	1.31361	4.73e-07	44234.5	69792	15986.3	32307
Grik5	glutamate receptor, ionotropic, kainate 5 (gamma 2)	1.30869	0.0317656	77	60	30	27
Pcolce2	procollagen C-endopeptidase enhancer 2	1.30833	3.14e-15	1443	1888	630	749
Tmem56	-	1.30196	0.0365797	60	63	32	18
Masp1	mannan-binding lectin serine peptidase 1	1.30169	0.00919942	311.5	181	88	125
Fxyd1	FXYD domain-containing ion transport regulator 1	1.30114	2.39e-08	1314	1434	404	780
RT1-DA	-	1.29802	1.78e-10	17816	28281	7496	11940
Kazald1	Kazal-type serine peptidase inhibitor domain 1	1.29727	3.08e-08	392	436	148	202
EMR4	-	1.29207	0.062859	54	128	25	52
Tgfb3	transforming growth factor, beta 3	1.27876	4.29e-16	1517	1594	585	745
Scnn1b	sodium channel, nonvoltage-gated 1 beta	1.27206	0.0382705	74	62	30	28
Klhl23	kelch-like 23	1.27146	0.0238857	145	130	68	47
Gata2	GATA binding protein 2	1.26976	0.0763256	197	84	49	77
Ppp2r3a	protein phosphatase 2, regulatory subunit B'', alpha	1.26941	0.00252869	925	528	329	296
Cgref1	cell growth regulator with EF hand domain 1	1.26295	5.85e-06	1884	3535	1108	1157
Rai2	retinoic acid induced 2	1.26277	0.00157234	256	217	78	131
Peg3	paternally expressed 3	1.26161	2.29e-06	1772.5	1771.5	516	1065.5
LOC501110	-	1.26145	1.21e-05	388	369	122	212
Ogn	osteoglycin	1.2597	9.52e-08	10486	11028	3171	6429
S100a1	S100 calcium binding protein A1	1.25291	0.0943888	106	60	27	48
Gpx1	glutathione peroxidase 1	1.2526	1.64e-11	12096	15328	4384	7723
Sfrp4	secreted frizzled-related protein 4	1.25224	2.58e-05	13027	14608	3643	8859
Ano1	anoctamin 1, calcium activated chloride channel	1.24783	0.0606494	140	98	60	42
Klf15	Kruppel-like factor 15	1.2469	0.0100349	289	202	75	148
Plscr2	phospholipid scramblase 2	1.24602	0.0943393	139	665	132	208
Fndc5	fibronectin type III domain containing 5	1.2396	0.0174388	190	176	45	123
Akap6	A kinase (PRKA) anchor protein 6	1.23926	0.0388367	187	97	63	63
Zbtb16	zinc finger and BTB domain containing 16	1.23849	0.0818895	278	118	95	80
LOC497796	-	1.23763	0.000943499	163.08	244.69	61.92	118.55
Rbm20	RNA binding motif protein 20	1.23124	0.0422736	85	61	30	35
Pdgfd	platelet-derived growth factor, D polypeptide	1.22637	1.52e-05	319	472	147	201
Cxcl14	chemokine (C-X-C motif) ligand 14	1.22297	0.0438812	1080	396	239	458
Mfap2	microfibrillar-associated protein 2	1.22091	1.83e-07	4427	5365	1496	2961
Cyhr1	cysteine and histidine rich 1	1.21576	0.033378	76	73	33	33
Sspn	sarcospan	1.21402	6.64e-05	651	485	230	283
Sh2d4a	SH2 domain containing 4A	1.20916	0.0125432	100	154	43	71
Postn	periostin, osteoblast specific factor	1.20785	4.06e-07	77637	128727	33708	59373
Lrrc20	leucine rich repeat containing 20	1.2069	0.0354667	481	210.5	115	212
Hdc	histidine decarboxylase	1.20145	0.044425	251	141	59	127
Igfbp5	insulin-like growth factor binding protein 5	1.19738	0.00242391	5466	12746	2639	5638
Sv2b	synaptic vesicle glycoprotein 2 b	1.19458	0.0577819	101	66	33	44
Cybrd1	cytochrome b reductase 1	1.1924	1.67e-11	1276	1751	588	776
Mapk12	mitogen-activated protein kinase 12	1.19107	0.000473967	326	286	126	153
Mpp7	membrane protein, palmitoylated 7 (MAGUK p55 subfamily member 7)	1.1884	0.0982344	55	43	25	19
Pdk4	pyruvate dehydrogenase kinase, isoenzyme 4	1.1844	0.0234887	95	76	28	52
Dnajc28	DnaJ heat shock protein family (Hsp40) member C28	1.17727	0.099971	47	56	21	26
Meox2	mesenchyme homeobox 2	1.17353	0.0159921	428	255	109	220
PPAPDC3	-	1.17256	0.0581167	385	155	111	146
Pm20d2	peptidase M20 domain containing 2	1.16272	0.0833686	219	92	67	81
Smpd3	sphingomyelin phosphodiesterase 3, neutral	1.16162	0.0670754	808	1760	241	1000
Itm2a	integral membrane protein 2A	1.16102	0.00446301	7116	4685	1640	4173
C1qtnf2	C1q and tumor necrosis factor related protein 2	1.1607	4.1e-08	1899	2137	677	1231.5
Phkb	phosphorylase kinase beta	1.15985	0.00250015	824	499	251	382
Cpz	carboxypeptidase Z	1.15763	6.57e-09	5511	8287	2464	3964
Usp13	ubiquitin specific peptidase 13 (isopeptidase T-3)	1.15609	0.00497515	602	365	219	235
Des	desmin	1.14827	0.01521	9257	4243	3445	2881
Sema3d	sema domain, immunoglobulin domain (Ig), short basic domain, secreted, (semaphorin) 3D	1.14431	0.00646553	445	1128	309	409
Sema5a	sema domain, seven thrombospondin repeats (type 1 and type 1-like), transmembrane domain (TM) and short cytoplasmic domain, (semaphorin) 5A	1.14173	0.00771121	616	445	281	208
RGD1566386	-	1.14098	0.0439965	95	92	35	54
Csrp2	cysteine and glycine-rich protein 2	1.13965	9.34e-05	1011	1577	631	541
Tcea3	transcription elongation factor A (SII), 3	1.13183	0.00100668	396	298	151	179.5
Afap1l1	actin filament associated protein 1-like 1	1.1285	0.00618016	382	251	131	175
Fat4	FAT atypical cadherin 4	1.12785	1.74e-08	880	1011	346	561
Tbx15	T-box 15	1.12674	0.000793783	615	458.5	204.5	318
Vamp5	vesicle-associated membrane protein 5	1.12597	0.032636	244	145	69	123
Pxmp2	peroxisomal membrane protein 2	1.12572	0.0956963	119	74	34	61
Ephb2	Eph receptor B2	1.12358	0.000315069	211	238	95	118
APEG3	-	1.12351	0.0234887	129.5	117.5	46	74.5
Pam	peptidylglycine alpha-amidating monooxygenase	1.11562	5.37e-10	5003	7603	2572	3396
Hoxc8	homeobox C8	1.11549	0.0306838	154	189	49	120
Hacd1	3-hydroxyacyl-CoA dehydratase 1	1.10562	0.00329583	340	278	126	176
Rcan2	regulator of calcineurin 2	1.10383	0.004151	449	618	152	378
Timp4	tissue inhibitor of metalloproteinase 4	1.10365	0.000702246	239	290	95	163
Twsg1	twisted gastrulation BMP signaling modulator 1	1.09617	0.00227153	191	261.83	78.5	143.5
Mmp27	matrix metallopeptidase 27	1.09506	0.000802011	1535	2857	721	1427
Nox4	NADPH oxidase 4	1.0937	0.0117298	238	452	117	219
Lepr	leptin receptor	1.09218	0.00897615	179	175	70	104
Fhl5	four and a half LIM domains 5	1.09058	0.0668612	90	74	33	48
Crabp1	cellular retinoic acid binding protein I	1.08957	0.0125635	368	240	156	139
Mpz	myelin protein zero	1.08719	0.0826454	434	280	225	110
Dmrt2	doublesex and mab-3 related transcription factor 2	1.08183	0.0564057	272	210	67	182
Usp2	ubiquitin specific peptidase 2	1.07703	0.0288389	292	171	95	139
Rab40b	Rab40B, member RAS oncogene family	1.07698	0.0349236	101	93	41	55
Dpep1	dipeptidase 1	1.06791	0.00856294	198	309	83	171
Mt3	metallothionein 3	1.06678	0.00228544	237	163	96	103
Tc2n	tandem C2 domains, nuclear	1.06564	0.0232534	224	149	73	117
Pknox2	Pbx/knotted 1 homeobox 2	1.06189	0.00678961	185	165	76	99
Schip1	schwannomin interacting protein 1	1.05847	0.0798408	413	232	188	128
Ldhb	lactate dehydrogenase B	1.0575	0.0438147	451	275	111	272
Kit	KIT proto-oncogene receptor tyrosine kinase	1.05736	0.00100668	251	386	140	173
RT1-BB	-	1.05674	7.09e-08	5694.5	9092.5	3071.5	4225.5
Lmcd1	LIM and cysteine-rich domains 1	1.05667	0.0354576	465	266	197	166
Entpd2	ectonucleoside triphosphate diphosphohydrolase 2	1.05526	9.79e-07	1245	1736	580	911.5
Lgr4	leucine-rich repeat-containing G protein-coupled receptor 4	1.05355	1.59e-05	345	470	177	227
Fam107a	family with sequence similarity 107, member A	1.05198	0.0948218	185	101	69	76
Ace	angiotensin I converting enzyme (peptidyl-dipeptidase A) 1	1.05034	1.85e-07	2016	3142	1135	1408
Fzd4	frizzled class receptor 4	1.04713	0.000165615	1197	1009	406	734
Hoxb7	homeobox B7	1.04581	0.0932569	80	66	32	42
WISP2	-	1.04566	0.0332441	4701	4982	1111	4065
Slc25a4	solute carrier family 25 (mitochondrial carrier, adenine nucleotide translocator), member 4	1.0455	3.18e-06	8608	6705	3346	4457
Six4	sine oculis-related homeobox 4	1.0422	0.0893507	105	85	49	46
Tmem45b	transmembrane protein 45b	1.03991	0.0148811	299	232	106	168
Dpp4	dipeptidylpeptidase 4	1.03951	0.0559923	2905	8007	1489	4096
LOC688090	-	1.03895	0.000183315	1404.5	2510.5	924.5	993.5
Cfl2	cofilin 2, muscle	1.03799	0.000197473	1907	1407	806	872
Lims2	LIM and senescent cell antigen like domains 2	1.03644	1.02e-07	950	1194	430	659
Slc47a1	solute carrier family 47, member 1	1.03393	0.0512438	120	233	74	102
KITLG	-	1.03348	0.000116965	1286	978	505	657
P2ry14	purinergic receptor P2Y, G-protein coupled, 14	1.03253	0.00499712	287	438	121	252
Mllt3	myeloid/lymphoid or mixed-lineage leukemia; translocated to, 3	1.03197	0.0486994	178	192	53	142
Stmn4	stathmin-like 4	1.02988	0.0814509	137	412.5	113	157.5
Tmeff2	transmembrane protein with EGF-like and two follistatin-like domains 2	1.02937	0.00329927	991	977	310.5	730.5
Bcam	basal cell adhesion molecule	1.0279	0.00594288	1157	756	507	462
Pik3ip1	phosphoinositide-3-kinase interacting protein 1	1.02719	0.000743485	435	352	170	236
Olfml1	olfactomedin-like 1	1.02517	0.00170587	1410	1858	508	1208
Nipal2	NIPA-like domain containing 2	1.02376	0.000468394	348	385	153	223
Pgm5	phosphoglucomutase 5	1.01988	0.0492117	195	127	83	82
Nqo2	N-ribosyldihydronicotinamide quinone reductase 2	1.01323	0.00668951	228	271	85	177
Ptp4a3	protein tyrosine phosphatase 4a3	1.01305	0.0148025	586	365	189	317
Nfib	nuclear factor I/B	1.0078	0.00744968	319	256	109	196
