# Supplementary material for: Biological Evaluation of the Effect of Root Canal Sealers Using a Rat Model
Source: Pharmaceutics. 2022 Sep 24;14(10):2038. doi: 10.3390/pharmaceutics14102038 (PMC9606985; doi:10.3390/pharmaceutics14102038)
Supplement: Supplementary file 1 [file pharmaceutics-14-02038-s001.zip › 20210131Dataset3.xlsx]

## Sheet: Control vs Canals
Dataset 3-1: Differentially downregulated genes of Canals group, as compared to those of control group.
Gene symbol	Gene name	log2 FC	FDR	Control_1 count	Control_2 count	Canals_1 count	Canals_2 count
Nos2	nitric oxide synthase 2, inducible	-4.95728	2.51e-05	24.5	57.5	925.33	1197
Crisp1	cysteine-rich secretory protein 1	-4.7094	0.00718114	1	2	24	44
Cda	cytidine deaminase	-4.63037	0.0756006	0	1	10	11
KRTAP13-2	-	-4.48835	0.0238626	0	5	40	52
MT1A	-	-3.98766	2.41e-63	805	1055	11380	13550
CLEC4M	-	-3.57059	3.58e-08	27	9	166	209
Gsg1	germ cell associated 1	-3.49965	1.08e-09	27	5	133	188
Car4	carbonic anhydrase 4	-3.25633	9.04e-06	6	41	153	218
Cxcl2	chemokine (C-X-C motif) ligand 2	-2.89981	0.000128598	7	11	50	64
Vsig4	V-set and immunoglobulin domain containing 4	-2.8764	0.000101711	42	22	194	212
MT2A	-	-2.73466	6.81e-35	1592	1583	8634	9271
Lcn2	lipocalin 2	-2.59611	1.11e-11	90	250	716	1001
Fcnb	ficolin B	-2.59382	4.78e-21	90	153	513	734
Mcemp1	mast cell expressed membrane protein 1	-2.54258	8.59e-10	42	28	159	192
Ahrr	aryl-hydrocarbon receptor repressor	-2.53898	0.00451443	15	12	63	71
CYP2B12	-	-2.2939	0.0309814	6.25	5	26	18.75
LY6AL	-	-2.27274	0.0507204	8	13	30.5	58
Kcnh1	potassium voltage-gated channel, subfamily H (eag-related), member 1	-2.23958	0.0319887	4	7	15	30
LY6C	-	-2.17991	3.7e-09	332.17	630.67	1606.17	2051.5
Hspa1a	heat shock protein 1A	-2.06682	6.55e-07	165.5	141	474	638.5
Havcr2	hepatitis A virus cellular receptor 2	-1.98605	0.00358973	23	42	109	104
NIACR1	-	-1.90957	0.0087293	19	70	123	153
IRG1	-	-1.89694	0.0347408	27	86	157	190
Ifi27l2b	interferon, alpha-inducible protein 27 like 2B	-1.87458	1.49e-05	1300	3603	6552	8323
Dsc2	desmocollin 2	-1.78799	0.0269291	48	38	110	147
Hmox1	heme oxygenase 1	-1.71667	1.13e-11	2658	4903	8631	12376
Hspa1b	heat shock protein 1B	-1.70269	2.07e-14	704.65	760.45	1675.9	2435.63
Akr1b8	aldo-keto reductase family 1, member B8	-1.57329	3.65e-44	1238.83	1523	2994.83	4024
CHI3L1	-	-1.45275	0.0028849	96	109	179	309
Sdcbp2	syndecan binding protein (syntenin) 2	-1.3726	0.0615865	15	42	56	67
Nqo1	NAD(P)H dehydrogenase, quinone 1	-1.36964	5.42e-16	425	425	793	1098
Akr1b10	aldo-keto reductase family 1, member B10 (aldose reductase)	-1.3695	7.74e-13	198.67	199.83	378	507
Kcnt2	potassium channel, subfamily T, member 2	-1.36388	0.0704502	34	52	87	99
Ifit3	interferon-induced protein with tetratricopeptide repeats 3	-1.35576	0.0399323	595	1436	1882	2444
Sbsn	suprabasin	-1.3383	1.47e-07	349.25	571	846.5	1120
Lbp	lipopolysaccharide binding protein	-1.31306	2.73e-05	840	1406	2006	2709
Cxcl13	chemokine (C-X-C motif) ligand 13	-1.30861	0.0117902	800	788	1523	1838
Fth1	ferritin heavy polypeptide 1	-1.23816	1.62e-09	31179	44489	67478	83200.5
Runx3	runt related transcription factor 3	-1.22972	0.0846736	27	27	45	64
OAS1K	-	-1.19965	0.0177557	89.5	162	193	300
Itgb7	integrin beta 7	-1.18286	0.0516034	276	515	630	886
Lst1	leukocyte specific transcript 1	-1.16633	9.88e-07	309.5	294	505.25	659.5
Zfand2a	zinc finger, AN1-type domain 2A	-1.16353	2.65e-07	694.5	901.5	1277	1777
Plac8	placenta-specific 8	-1.15144	7.3e-08	2417	3382.5	4708	6228
Trem1	triggering receptor expressed on myeloid cells 1	-1.14601	7.35e-06	236	307	407	626.5
Angptl4	angiopoietin-like 4	-1.14013	0.0878237	351	486	658	914
Slc11a1	solute carrier family 11 (proton-coupled divalent metal ion transporters), member 1	-1.11019	1.78e-06	579	975	1227	1602.5
Erbb3	erb-b2 receptor tyrosine kinase 3	-1.08019	3.58e-08	511	500	794	1042
RGD1559482	-	-1.07344	6.21e-20	3906.41	4493.65	6459.98	8668.43
Slc15a3	solute carrier family 15, member 3	-1.04113	1.27e-05	491	788	906.5	1334.83
Ccl4	chemokine (C-C motif) ligand 4	-1.00858	0.0353385	66	84	120	135

## Sheet: Control vs BG
Dataset 3-2: Differentially downregulated genes of BG group, as compared to those of control group.
Gene symbol	Gene name	log2 FC	FDR	Control_1 count	Control_2 count	BG_1 count	BG_2 count
Serpinb11	serine (or cysteine) peptidase inhibitor, clade B (ovalbumin), member 11	-7.66637	0.0009963	0	0	33	41
Dnase2b	deoxyribonuclease II beta	-6.67454	0.00255507	0	1	47	53
Prl6a1	prolactin family 6, subfamily a, member 1	-6.57762	0.000516625	0	1	43	51
Slc17a3	solute carrier family 17 (sodium phosphate), member 3	-6.57602	0.000481871	1	0	54	39
Cda	cytidine deaminase	-6.56952	0.000313674	0	1	47	46
Tekt5	tektin 5	-6.13685	0.00410617	1	0	32	38
Hsd3b6	hydroxy-delta-5-steroid dehydrogenase, 3 beta- and steroid delta-isomerase 6	-5.98166	0.00985439	0	1	28	34
Tdo2	tryptophan 2,3-dioxygenase	-5.23334	0.00140594	1	1	29	46
CYP2B12	-	-5.00143	1.28e-12	6.25	5	158.58	189.5
Cxcl3	chemokine (C-X-C motif) ligand 3	-4.97288	0.0245074	0	1	13	18
Cldn10	claudin 10	-4.90794	0.00283494	1	1	29	30
RGD1559493	-	-4.82231	0.0382482	0	1	11	17
Clca2	chloride channel accessory 2	-4.70836	0.00182321	5	2.5	77.5	107.5
Crisp1	cysteine-rich secretory protein 1	-4.61033	0.00195153	1	2	38	33
Rps6ka6	ribosomal protein S6 kinase polypeptide 6	-4.49778	0.0303598	2	0	21	25
Casp14	caspase 14	-4.49558	5.7e-05	2	5	68	86
Fam178b	family with sequence similarity 178, member B	-4.48697	0.0929344	2	0	16	31
Chrng	cholinergic receptor, nicotinic, gamma polypeptide	-4.4613	0.000572875	8	2	107.5	116
Nccrp1	non-specific cytotoxic cell receptor protein 1 homolog (zebrafish)	-4.45055	0.00119144	4	1	53.5	56
Bmp8a	bone morphogenetic protein 8a	-4.34558	0.0172036	8	0	80.5	90
CYP2B21	-	-4.32689	0.017997	3	0	26	36
Elovl4	elongation of very long chain fatty acids (FEN1/Elo2, SUR4/Elo3, yeast)-like 4	-4.27845	7.63e-09	21	8	257	314
Sdr16c6	short chain dehydrogenase/reductase family 16C, member 6	-4.15703	7.94e-05	3	4	55	68
Actbl2	actin, beta-like 2	-4.08917	0.0848577	31	1	275	299
ALOX15B	-	-4.06203	0.0774258	1	1	22	10
IL36RN	-	-3.97989	0.000572735	3	4	47	62
Slc5a8	solute carrier family 5 (iodide transporter), member 8	-3.95663	0.066678	2	1	26	20
Fgfbp1	fibroblast growth factor binding protein 1	-3.92468	0.0509107	10	0	65	96
Mmp9	matrix metallopeptidase 9	-3.89321	7.95e-08	279	774	6831	8145
Gsg1	germ cell associated 1	-3.88138	8.92e-13	27	5	222	258
Creb3l4	cAMP responsive element binding protein 3-like 4	-3.85357	0.0165644	8	0	46	76
Prlhr	prolactin releasing hormone receptor	-3.81084	0.0785624	2	0	17	11
Fut2	fucosyltransferase 2	-3.76254	0.00858163	2	2	29	24
Krt1	keratin 1	-3.75499	4.36e-05	4	6	64	68
Kdf1	keratinocyte differentiation factor 1	-3.69612	0.00944713	7	3	60	71
Cers3	ceramide synthase 3	-3.69477	0.00487918	12	3	91	108
Tfap2b	transcription factor AP-2 beta	-3.65757	0.0297064	11	3	84	97
Krt39	keratin 39	-3.65626	0.00586707	13	10	149	138
Atp13a4	ATPase type 13A4	-3.65566	0.00140594	15	5	104	155
Rnf180	ring finger protein 180	-3.63609	0.0173887	18	4	143	137
Ap1m2	adaptor protein complex AP-1, mu 2 subunit	-3.63401	0.00383018	27	5	203	206
Plek2	pleckstrin 2	-3.60596	0.0774258	8	1	56	57
Elovl3	elongation of very long chain fatty acids (FEN1/Elo2, SUR4/Elo3, yeast)-like 3	-3.58973	0.0701728	116	8	727	846
Wfdc6a	WAP four-disulfide core domain 6A	-3.58873	0.00123778	2	3	28	31
Stra6	stimulated by retinoic acid gene 6	-3.56701	0.0456888	29	26	300	348
Mt3	metallothionein 3	-3.54258	1.62e-38	237	163	2043	2643
Gjb6	gap junction protein, beta 6	-3.53545	0.01391	20	4	129	159
Krt23	keratin 23	-3.47137	0.0939772	60	20	470	433
Fam83b	family with sequence similarity 83, member B	-3.46847	0.0238737	7	3	51	61
Lypd6b	LY6/PLAUR domain containing 6B	-3.4612	0.00116167	10	7	86	101
KLK1C7	-	-3.45633	0.0008279	44.5	2	231.5	300.33
Cdk18	cyclin-dependent kinase 18	-3.43346	0.000121733	4	6	56	49
Wnt10a	wingless-type MMTV integration site family, member 10A	-3.41989	0.0242908	14	3	95	91
Tmem184a	transmembrane protein 184a	-3.4174	0.000516785	11	7	85	108
Tdh	L-threonine dehydrogenase	-3.39182	9.93e-05	7	8	66	90
Mfsd2a	major facilitator superfamily domain containing 2A	-3.38814	0.00205552	41	12	255	316
CKMT1B	-	-3.38641	0.0098713	24	1	133	140
Kcnh1	potassium voltage-gated channel, subfamily H (eag-related), member 1	-3.38521	4.46e-06	4	7	57	55
Acsbg1	acyl-CoA synthetase bubblegum family member 1	-3.37843	0.098	63	5	379	359
Chac1	ChaC, cation transport regulator 1	-3.35276	0.00207858	235	53	1470	1569
Fam83a	family with sequence similarity 83, member A	-3.34938	0.0545969	5	1	25	38
Tpd52l1	tumor protein D52-like 1	-3.34086	2.04e-06	45	10	264	309
Ly6g6d	lymphocyte antigen 6 complex, locus G6D	-3.32036	0.0997588	181	24	995	1147
Ppfia3	protein tyrosine phosphatase, receptor type, f polypeptide (PTPRF), interacting protein (liprin), alpha 3	-3.30384	0.00123523	14	7	103	105
Ankrd1	ankyrin repeat domain 1 (cardiac muscle)	-3.28796	0.0997588	144	9	735	840
Gal3st1	galactose-3-O-sulfotransferase 1	-3.26828	0.0258713	3	4	39	26
Slc1a1	solute carrier family 1 (neuronal/epithelial high affinity glutamate transporter, system Xag), member 1	-3.25421	0.00733376	3	7	40	53
Acer1	alkaline ceramidase 1	-3.24953	1.18e-05	26	11	177.5	176
Siglec15	sialic acid binding Ig-like lectin 15	-3.24733	1.32e-06	7	13	89	96
Slc51a	solute carrier family 51, alpha subunit	-3.22597	0.00431513	8	1	39	47
Defb1	defensin beta 1	-3.22245	0.0712686	23	0	110	116
Slc34a2	solute carrier family 34 (sodium phosphate), member 2	-3.21369	0.00273545	10	4	55	77
Ggt1	gamma-glutamyltransferase 1	-3.18919	7.92e-05	26	7	139	169
Serpinb13	serine (or cysteine) peptidase inhibitor, clade B (ovalbumin), member 13	-3.18873	0.0938673	10	2	57	55
Krt80	keratin 80	-3.18619	0.0642539	86	22	460	557
Actc1	actin, alpha, cardiac muscle 1	-3.18436	0.0112298	276	46	1431	1617
Adh6a	alcohol dehydrogenase 6A (class V)	-3.18384	0.0090862	11	3	58	72
Cdcp1	CUB domain containing protein 1	-3.18273	8.46e-05	16	13	114	149
Cwh43	cell wall biogenesis 43 C-terminal homolog	-3.17332	0.0211175	9	4	58	60
Krt77	keratin 77	-3.14837	0.0424459	15	1.5	74.26	81.5
Slc12a5	solute carrier family 12, member 5	-3.14631	0.0129784	4	2	25	28
Aldh1a7	aldehyde dehydrogenase family 1, subfamily A7	-3.14573	0.0834091	1	3.5	9.5	34
Slc9b2	solute carrier family 9, subfamily B (NHA2, cation proton antiporter 2), member 2	-3.14121	1.94e-07	46	21	289	307
Liph	lipase, member H	-3.14102	0.000137656	16	6	99	96
Pnpla5	patatin-like phospholipase domain containing 5	-3.13633	0.0400198	10	0	47	44
Ggt6	gamma-glutamyltransferase 6	-3.13394	0.0910702	10	2	47	62
Dnajc6	DnaJ heat shock protein family (Hsp40) member C6	-3.1183	3.57e-05	22	14	165	145
Sptssb	serine palmitoyltransferase, small subunit B	-3.11034	0.028009	8	3	46	50
Mmp13	matrix metallopeptidase 13	-3.08771	3.08e-12	29	31	236	267
TMEM8C	-	-3.08649	0.000146431	10	11	81	95
Awat1	acyl-CoA wax alcohol acyltransferase 1	-3.07256	0.00802428	6	3	41	34
Kirrel2	kirre like nephrin family adhesion molecule 2	-3.06921	0.00551587	5	5	31	53
Corin	corin, serine peptidase	-3.06488	0.0616659	4	2	19	32
Rnf222	ring finger protein 222	-3.05001	0.0364571	30	9	144	189
Rab25	RAB25, member RAS oncogene family	-3.04993	0.0370141	100	39	553	622
Cldn3	claudin 3	-3.04897	0.0552864	11	2	50	61
Tmem229a	transmembrane protein 229A	-3.04687	0.00561377	28	9	136	178
Rem2	rad and gem related GTP binding protein 2	-3.04454	0.0663645	3	3	29	19
Cym	chymosin	-3.0338	0.0128617	11	1	42	60
Ovol1	ovo like zinc finger 1	-3.02676	0.0938673	194	44	944	1064
Uox	urate oxidase	-2.99916	0.0060718	10	7	74	60
Pla2g2e	phospholipase A2, group IIE	-2.9937	0.00290116	15	18	111	149
Padi4	peptidyl arginine deiminase, type IV	-2.99205	0.0624054	70	30	392	416
Tmc4	transmembrane channel-like gene family 4	-2.98715	0.00669915	8	6	48	63
Tgfa	transforming growth factor alpha	-2.96595	0.00491594	73	14	338	365
Tenm2	teneurin transmembrane protein 2	-2.94809	0.0247105	27.5	8	133	152
Pla2g2f	phospholipase A2, group IIF	-2.94291	0.0431564	46	2	165	226
FAM25A	-	-2.93904	0.0372431	163	33	689	877
Lypd5	Ly6/Plaur domain containing 5	-2.93849	0.0562762	17	5	85	87
Gjb2	gap junction protein, beta 2	-2.9312	0.054795	416	143	2110	2252
Aox4	aldehyde oxidase 4	-2.92843	0.0671372	8	3	39	46
Gprc5d	G protein-coupled receptor, family C, group 5, member D	-2.92565	0.0506539	488	190	2377	2901
Notum	notum palmitoleoyl-protein carboxylesterase	-2.92232	0.074978	8	2	39	38
Prom2	prominin 2	-2.91865	0.069221	96	21	455	457
Grb7	growth factor receptor bound protein 7	-2.89383	0.049549	19	5	86	97
Lypd3	Ly6/Plaur domain containing 3	-2.89154	0.0192533	168	48	781	868
Acp5	acid phosphatase 5, tartrate resistant	-2.88903	7.32e-51	632	903	5198	5916
Dlgap3	DLG associated protein 3	-2.88543	0.0015918	6	6	52	34
Cxcl2	chemokine (C-X-C motif) ligand 2	-2.87436	2.86e-05	7	11	55	75
Tgm1	transglutaminase 1, K polypeptide	-2.86671	0.0003196	105	32	488	536
Gjb3	gap junction protein, beta 3	-2.85611	0.0294887	14	5	71	68
Ehf	ets homologous factor	-2.85109	0.0263753	16	5	76	78
Dsg3	desmoglein 3	-2.84795	0.0245877	45	6	174	209
Plekhs1	pleckstrin homology domain containing, family S member 1	-2.84537	0.00112054	2	14	58	51
Chdh	choline dehydrogenase	-2.84463	0.0539673	4	2	21	22
Trpm1	transient receptor potential cation channel, subfamily M, member 1	-2.83172	0.000238193	17	8	97	80
Srms	src-related kinase lacking C-terminal regulatory tyrosine and N-terminal myristylation sites	-2.83084	0.0376643	44	6	182	187
Dnaaf1	dynein, axonemal assembly factor 1	-2.83024	0.0218971	2	4	17	25
Gjb5	gap junction protein, beta 5	-2.83016	0.00496568	23	6	99	112
Golga7b	golgi autoantigen, golgin subfamily a, 7B	-2.82522	0.0955359	24	11	122	129
Macc1	metastasis associated in colon cancer 1	-2.82039	0.00139772	6	11	55	62
Gdpd3	glycerophosphodiester phosphodiesterase domain containing 3	-2.8124	0.0176447	16	5	79	70
Atg9b	autophagy related 9B	-2.80535	0.00118586	85	21	361	402
OCM2	-	-2.80433	2.1e-05	29	14	145	157
Grhl2	grainyhead like transcription factor 2	-2.7988	0.0240669	34	1	131	123
Chrnd	cholinergic receptor, nicotinic, delta polypeptide	-2.79858	0.0319288	34	2	125	137
Fam83h	family with sequence similarity 83, member H	-2.78549	0.0892064	177	44	715	863
MT1A	-	-2.77011	3.8e-30	805	1055	5352	7157
Rassf6	Ras association (RalGDS/AF-6) domain family member 6	-2.76534	0.0325	8	6	43	52
Slc5a10	solute carrier family 5 (sodium/glucose cotransporter), member 10	-2.76128	0.0304887	31	12	145	151
LPPR3	-	-2.75405	0.00257188	13	6	53	77
Nfe2l3	nuclear factor, erythroid derived 2, like 3	-2.74818	0.0237682	35	9	142.5	162
Hsd17b14	hydroxysteroid (17-beta) dehydrogenase 14	-2.7371	0.001772	90	39	425	447
Ltk	leukocyte tyrosine kinase	-2.73161	6.33e-05	8	18	76	92
Clic3	chloride intracellular channel 3	-2.71882	0.0123234	18	9	79	101
Cdh1	cadherin 1	-2.70816	0.0887372	194	46	768	853
Prss22	protease, serine 22	-2.69121	0.0857396	15	1	61	45
Myl4	myosin, light polypeptide 4	-2.67315	0.000395471	116	27	442	499
Tmem79	transmembrane protein 79	-2.67011	2.03e-05	44	22	202	221
Awat2	acyl-CoA wax alcohol acyltransferase 2	-2.66857	0.000876559	11	10	70	61
Rassf7	Ras association (RalGDS/AF-6) domain family (N-terminal) member 7	-2.66725	0.00197174	25	8	89	126
Prodh2	proline dehydrogenase (oxidase) 2	-2.66304	0.00284603	3	18	58	69
Capn8	calpain 8	-2.6575	0.0744	12	3	51	45
Sostdc1	sclerostin domain containing 1	-2.65212	0.00354607	43	12	162	193
Map7	microtubule-associated protein 7	-2.6493	0.000427185	60	33	264	326
Irf6	interferon regulatory factor 6	-2.64592	1.06e-05	156	58	609	763
Sez6l2	seizure related 6 homolog like 2	-2.64398	3.83e-06	10	28	104	126
Glb1l2	galactosidase, beta 1-like 2	-2.6337	0.0166687	45	9	177	167
Lad1	ladinin	-2.63274	3.59e-05	241	97.5	997	1147
Mybph	myosin binding protein H	-2.62383	0.0429302	205	40	759	805
Gata3	GATA binding protein 3	-2.61337	0.00925423	35	11	159	125
Dsc2	desmocollin 2	-2.6133	1.27e-05	48	38	259	263
Fbp1	fructose bisphosphatase 1	-2.6063	0.0304988	65	16	236	273
LOC365985	-	-2.60518	0.00224153	8	26	82	118.5
Gabrr1	gamma-aminobutyric acid (GABA) C receptor, subunit rho 1	-2.60451	0.0735047	1	8	25	27
Krt75	keratin 75	-2.59042	0.045473	609	213	2457.5	2603
Cth	cystathionase (cystathionine gamma-lyase)	-2.58976	0.00491245	35	31	182	213
Galnt3	polypeptide N-acetylgalactosaminyltransferase 3	-2.58741	0.000567972	15	10	62	89
Hsbp1l1	heat shock factor binding protein 1-like 1	-2.58053	0.0915447	4	4	24	23
Tecta	tectorin alpha	-2.56974	0.0873803	13	1	42	44
Pkp1	plakophilin 1	-2.56919	0.0239552	509	244	2128	2409
LOC100909970	-	-2.56787	0.0905882	3	3	10	26
LOC498222	-	-2.56381	0.0437143	31	7	118	112
Cyp11a1	cytochrome P450, family 11, subfamily a, polypeptide 1	-2.55901	0.0248203	6	5	32	32
Trex2	three prime repair exonuclease 2	-2.54228	0.0337273	14	4	49	58
Dclk3	doublecortin-like kinase 3	-2.541	3.92e-07	47	33	216	249
Myo5b	myosin VB	-2.54061	0.0215418	46	13	174	177
Mycn	v-myc avian myelocytomatosis viral related oncogene, neuroblastoma derived	-2.5309	0.064895	37	13	140	155
Sult2b1	sulfotransferase family, cytosolic, 2B, member 1	-2.52835	0.0861669	37	8	114	156
Otop2	otopetrin 2	-2.52485	0.0100443	17	8	55	92
Fam83f	family with sequence similarity 83, member F	-2.51979	0.00685356	10	9	50	58
Fut1	fucosyltransferase 1	-2.51672	0.0439782	48	16	181	193
Cacng4	calcium channel, voltage-dependent, gamma subunit 4	-2.50047	0.0674826	4	4	26	18
Tfap2c	transcription factor AP-2, gamma	-2.49305	0.029565	86	16	283	312
Cysrt1	cysteine rich tail 1	-2.4817	0.0244982	21	4	71	72
Rnf43	ring finger protein 43	-2.48149	0.000627	10	13	60	66
Slc4a9	solute carrier family 4, sodium bicarbonate cotransporter, member 9	-2.47843	0.0425603	10	3	31	43
Lamb3	laminin, beta 3	-2.4747	0.00180294	50	31	213	239
Nipal4	NIPA-like domain containing 4	-2.46208	0.0670932	40	15	146	163
Crb3	crumbs family member 3	-2.45676	0.0557765	13	5	48	52
Il1a	interleukin 1 alpha	-2.45354	0.0200969	8	2	28	27
Pcsk1	proprotein convertase subtilisin/kexin type 1	-2.44119	1.1e-09	45	66	260	332
Lef1	lymphoid enhancer binding factor 1	-2.43911	0.000363884	42	23	171	183
Trpv3	transient receptor potential cation channel, subfamily V, member 3	-2.43628	0.0043386	25	10	89	103
Capns2	calpain, small subunit 2	-2.42576	0.024066	39	8	119	142
Tmem151a	transmembrane protein 151A	-2.41908	0.00122879	8	11	37	64
Fam71f2	family with sequence similarity 71, member F2	-2.41285	0.0616659	5	4	19	29
Tenm4	teneurin transmembrane protein 4	-2.40578	0.00701414	27	9	92	102
Morc1	microrchidia 1	-2.4054	0.0833142	2	6	19	22
Gtsf1	gametocyte specific factor 1	-2.40502	0.000890551	9	7	39	45
LOC691670	-	-2.4044	0.0879025	5	2	19	18
Ass1	argininosuccinate synthetase 1	-2.40251	5.73e-07	152	166	798	857
RGD1311892	-	-2.38576	0.0351943	8	12	49	53
Dgki	diacylglycerol kinase, iota	-2.38448	0.000304124	14	32	118	113
Ccl3	chemokine (C-C motif) ligand 3	-2.37599	2.7e-07	120	299	970	1119
Bspry	B-box and SPRY domain containing	-2.37158	0.00164144	75	31	253	306
Dmkn	dermokine	-2.36581	0.0600376	197	91	710	798
Xkrx	X-linked Kx blood group related, X-linked	-2.36217	0.00501274	34	11	116	119
Aloxe3	arachidonate lipoxygenase 3	-2.36146	0.00999683	14	9	56	62
Gpr68	G protein-coupled receptor 68	-2.36109	9.88e-25	113	116	527	637
Esrp2	epithelial splicing regulatory protein 2	-2.36005	1.51e-05	160.5	79.5	583	664.5
Epn3	epsin 3	-2.34491	0.0694592	42.5	11	136	140
Tnnt2	troponin T2, cardiac	-2.3387	2.62e-07	52	62	240	331
Mill1	MHC I like leukocyte 1	-2.33853	0.0272779	18	5	53	66
Rnf39	ring finger protein 39	-2.33236	0.00831956	80	32.5	298	272
Serinc2	serine incorporator 2	-2.32904	9.56e-19	505	414	2164	2434
Krtap19-5	keratin associated protein 19-5	-2.32582	4.38e-11	60	61	275	325
Rdh16	retinol dehydrogenase 16	-2.32276	0.00306905	19	13	87	71
Spint1	serine protease inhibitor, Kunitz type 1	-2.32085	0.000354378	243	187	991	1157
Il6	interleukin 6	-2.31886	0.0254192	40	13	122	149
Rab11fip4	RAB11 family interacting protein 4 (class II)	-2.31487	3.82e-06	36	22	139	149
Krtcap3	keratinocyte associated protein 3	-2.31333	0.0769945	5	9	23	46
Celsr3	cadherin, EGF LAG seven-pass G-type receptor 3	-2.30442	0.0312	4	8	25	33
Gdf15	growth differentiation factor 15	-2.30123	8.97e-08	62	40	221	284
Cxcl1	chemokine (C-X-C motif) ligand 1	-2.28232	0.00843033	38	14	123	134
Sec1	secretory blood group 1	-2.28025	0.0486834	9	6	39	33
Samd5	sterile alpha motif domain containing 5	-2.26566	0.0658699	26	12	87	98
Slc35f2	solute carrier family 35, member F2	-2.26419	0.00913536	11	7	42	44
Dhcr24	24-dehydrocholesterol reductase	-2.2543	1.53e-08	83	112	443	466
LOC100359977	-	-2.25364	0.0646687	9	4	32	30.5
Akr1b8	aldo-keto reductase family 1, member B8	-2.25357	1.76e-93	1238.83	1523	5939.83	7017.75
Hmox1	heme oxygenase 1	-2.2488	7.34e-21	2658	4903	15991	18846
Ucp3	uncoupling protein 3 (mitochondrial, proton carrier)	-2.24566	0.0685826	12	4	36	41
Ptprn	protein tyrosine phosphatase, receptor type, N	-2.24486	5.51e-05	73	49	278	300
Epha1	Eph receptor A1	-2.24439	0.00107581	150.5	62	457.5	567.5
Hspa1a	heat shock protein 1A	-2.23177	7.63e-09	165.5	141	594	852
Adtrp	androgen dependent TFPI regulating protein	-2.22875	0.0200969	22	12	77	83
Lsr	lipolysis stimulated lipoprotein receptor	-2.2216	0.00297483	153	52	470	507
Eps8l1	EPS8-like 1	-2.22065	0.0146826	13	11	59	51
Etv4	ets variant 4	-2.22026	0.000285187	81	32	253	282
CD24	-	-2.20731	5.85e-05	189	64	581	611
Tac4	tachykinin 4	-2.20595	2.26e-08	36	32	150	160
Gsdma	gasdermin A	-2.19757	1.23e-06	366.55	196.65	1246.68	1363.58
Epgn	epithelial mitogen	-2.19584	0.000476903	22	15	79	90
Mal2	mal, T cell differentiation protein 2	-2.19397	0.0996193	37	16	105	143
Art4	ADP-ribosyltransferase 4	-2.18398	0.0774657	16	4	43	50
Marveld2	MARVEL (membrane-associating) domain containing 2	-2.18355	0.0499738	7	9	36	35
Acsm3	acyl-CoA synthetase medium-chain family member 3	-2.18342	0.000447076	72	51.5	283	277
Cdh17	cadherin 17	-2.18003	0.00260125	16	78	204	197
Scg2	secretogranin II	-2.17917	0.0192017	13	8	45	50
Llgl2	LLGL2 scribble cell polarity complex component	-2.17879	0.000178224	77	35	250	262
Ephx3	epoxide hydrolase 3	-2.17147	0.0103	45	14	118	155
Plb1	phospholipase B1	-2.15461	0.0642608	25	9	73	81
Fcho1	FCH domain only 1	-2.15416	6.29e-08	64	42	217	255
Lzts1	leucine zipper, putative tumor suppressor 1	-2.15088	0.000363014	71	40	247	247
Sdcbp2	syndecan binding protein (syntenin) 2	-2.14715	2.33e-05	15	42	119	124
Bambi	BMP and activin membrane-bound inhibitor	-2.14298	8.06e-05	158	77	518	529
Ppp1r14c	protein phosphatase 1, regulatory inhibitor subunit 14C	-2.12665	0.00143702	33	16	98	118
Fzd5	frizzled class receptor 5	-2.12416	0.00766	13	11	54	49
Wnt4	wingless-type MMTV integration site family, member 4	-2.1152	0.0481315	32	13	93	105
Havcr2	hepatitis A virus cellular receptor 2	-2.11433	0.000251845	23	42	119	156
Rhbg	Rhesus blood group-associated B glycoprotein	-2.1118	0.0194556	16	9	46	63
Hspa1b	heat shock protein 1B	-2.10998	4.74e-23	704.65	760.45	3060.58	3157.64
Coro2a	coronin, actin binding protein 2A	-2.10948	0.0566075	7	6	23	33
Acpp	acid phosphatase, prostate	-2.1074	0.000256182	101	73	349	401
Rdh12	retinol dehydrogenase 12	-2.10082	0.0495684	31	16	92	112
Serpinb10	serine (or cysteine) peptidase inhibitor, clade B (ovalbumin), member 10	-2.09213	0.000379682	25	39	114	154
MICALCL	MICAL C-terminal like	-2.09082	0.037797	22	12	73	72
Cpa4	carboxypeptidase A4	-2.08952	0.0923022	48	11	115	145
GYLTL1B	-	-2.08706	0.00541469	21	27	88	113
Car12	carbonic anhydrase 12	-2.08039	0.038755	8	17	58	43
Fcgbp	Fc fragment of IgG binding protein	-2.07784	0.00889	12	20	74	56
Ace2	angiotensin I converting enzyme (peptidyl-dipeptidase A) 2	-2.07544	0.0248203	32	16	97	107
Slc11a1	solute carrier family 11 (proton-coupled divalent metal ion transporters), member 1	-2.07343	1.11e-24	579	975	2908.5	3460
Gpld1	glycosylphosphatidylinositol specific phospholipase D1	-2.06695	0.000459495	58	45	209	220
Scube3	signal peptide, CUB domain, EGF-like 3	-2.0553	0.0715513	20	8	62	55
Vangl2	VANGL planar cell polarity 2	-2.05288	0.0306981	37	13	95	117
Slc39a2	solute carrier family 39 (zinc transporter), member 2	-2.04851	0.0763717	6	16	32	57
Hook1	hook microtubule tethering protein 1	-2.04721	4.01e-05	54	38	182	197
Adcyap1r1	adenylate cyclase activating polypeptide 1 receptor 1	-2.03945	0.0108097	40	40	141	186
Fosb	FBJ osteosarcoma oncogene B	-2.03249	0.095369	439	170	1160	1391
MT2A	-	-2.0223	5.02e-19	1592	1583	5488	7355
FAM46B	-	-2.01657	0.0209	135	98	451	491
Akr1b10	aldo-keto reductase family 1, member B10 (aldose reductase)	-2.01237	5.45e-30	198.67	199.83	717.67	875.75
Capn12	calpain 12	-2.00807	5.6e-08	210.5	146.5	687	744.5
Phyhip	phytanoyl-CoA hydroxylase interacting protein	-2.00316	0.0764162	43	14	114	119
Paqr5	progestin and adipoQ receptor family member V	-1.99686	0.0013435	20	17	79	66
Cited4	Cbp/p300-interacting transactivator, with Glu/Asp-rich carboxy-terminal domain, 4	-1.98338	0.0743573	54	17	119	171
Unc5b	unc-5 netrin receptor B	-1.96046	0.00217638	160	92	480	506
Krt76	keratin 76	-1.95722	0.0582874	9	21	62.56	48
Eps8l2	EPS8-like 2	-1.95496	0.000412012	141	77	398	455
Rbp2	retinol binding protein 2, cellular	-1.94666	0.00961905	20	14	66	64
Klc3	kinesin light chain 3	-1.94415	0.00331771	88	36.5	234	249.5
Lhx2	LIM homeobox protein 2	-1.9223	0.00581423	37	23	113	114
Trpv6	transient receptor potential cation channel, subfamily V, member 6	-1.8973	0.0751594	26	6	59	63
Nrg2	neuregulin 2	-1.8953	0.0356715	11	13	39.5	47.5
Nlrp10	NLR family, pyrin domain containing 10	-1.8846	0.00447364	40	21	104	123
Scnn1a	sodium channel, nonvoltage-gated 1 alpha	-1.88302	5.65e-05	35	33	110	139
Hist3h2ba	-	-1.88099	0.0240405	12.5	14.5	45.5	48.5
Dusp2	dual specificity phosphatase 2	-1.86889	5.7e-11	79	94	281	342
Tnfrsf19	tumor necrosis factor receptor superfamily, member 19	-1.86746	0.00369477	33	53	149	156
Foxc1	forkhead box C1	-1.86258	0.0552772	52	15	122	127
Cxadr	coxsackie virus and adenovirus receptor	-1.86235	0.0103534	22	20	66	86
Prm2	protamine 2	-1.86059	0.0687688	4	27	47	60
Stk26	serine/threonine kinase 26	-1.85843	7.26e-05	26	37	96	129
Arap2	ArfGAP with RhoGAP domain, ankyrin repeat and PH domain 2	-1.8566	1.42e-07	74	77	273	264
Dusp14	dual specificity phosphatase 14	-1.85495	0.00112286	181	118	501	586
Emp2	epithelial membrane protein 2	-1.85487	0.00128307	556	281	1396	1678
Mboat2	membrane bound O-acyltransferase domain containing 2	-1.84817	0.0114287	25	15	62	83
Bex1	brain expressed X-linked 1	-1.84604	0.0678794	19	9	44.5	57.5
Gpx2	glutathione peroxidase 2	-1.84486	0.00944713	35	25	102	113
Lrp2	low density lipoprotein receptor-related protein 2	-1.8445	0.0811315	7	10	34	25
Prdm1	PR domain containing 1, with ZNF domain	-1.83724	2.98e-11	96	146	374	474
Chmp4c	charged multivesicular body protein 4C	-1.82312	0.0875298	53	13	102	140
Sytl1	synaptotagmin-like 1	-1.82179	2.76e-05	92	59	249	286
Cldn23	claudin 23	-1.81901	0.099729	31	18	81	93
Shroom3	shroom family member 3	-1.81693	0.00951255	56	40	159	179
Lag3	lymphocyte-activation gene 3	-1.79943	0.000358673	28	35	97	119
Chrna1	cholinergic receptor, nicotinic, alpha polypeptide 1 (muscle)	-1.79221	0.000293239	69.83	48.83	212.17	196.58
LOC104940696	-	-1.78538	0.000728027	44	37	146	129
Msi1	musashi RNA-binding protein 1	-1.78515	0.062	17	15	54	55
Glod5	glyoxalase domain containing 5	-1.78018	0.0349	12	9	31	41
Prss8	protease, serine 8 (prostasin)	-1.77754	0.000627494	66	43.5	186	190
Tfrc	transferrin receptor	-1.77279	1.25e-17	808	659	2352	2640
Colq	collagen-like tail subunit (single strand of homotrimer) of asymmetric acetylcholinesterase	-1.76978	0.0821826	12	7	29	36
Fos	FBJ osteosarcoma oncogene	-1.76841	0.0365377	1072	331	2305	2609
Clec4d	C-type lectin domain family 4, member d	-1.76492	0.00153006	22	70	131	170
Ptcd3	pentatricopeptide repeat domain 3	-1.76204	4.56e-26	1908	2889	7321	8560.5
Baiap2l2	BAI1-associated protein 2-like 2	-1.75768	0.00070475	37	31	116	111
Clec4e	C-type lectin domain family 4, member e	-1.74582	0.00116167	50	184	352	394
Has3	hyaluronan synthase 3	-1.74414	0.0714749	23	11	53	62
Runx3	runt related transcription factor 3	-1.74372	0.000366683	27	27	96	81
Pip5k1b	phosphatidylinositol-4-phosphate 5-kinase, type 1 beta	-1.74294	0.0321248	23	18	54	84
KLRA22	-	-1.74089	0.0898588	15	32	70	82
Slc37a2	solute carrier family 37 (glycerol-3-phosphate transporter), member 2	-1.73931	6.54e-15	365	618	1497.5	1691.5
Rhov	ras homolog family member V	-1.7182	0.00886447	88	50	236	218
Cntfr	ciliary neurotrophic factor receptor	-1.70713	0.0786948	57	27	142	134
Scel	sciellin	-1.70641	0.0329163	81	81	213	315
Tlcd1	TLC domain containing 1	-1.70011	8.72e-05	83	56	209	243
Mapk13	mitogen-activated protein kinase 13	-1.69906	0.00023561	86	46	205	226
Fosl1	fos-like antigen 1	-1.69177	2.02e-05	64	42	153	190
Arnt2	aryl hydrocarbon receptor nuclear translocator 2	-1.6844	0.000322202	31	74	145	182
LOC689770	-	-1.68156	7.96e-08	72.5	107.25	238	326.75
Cnih2	cornichon family AMPA receptor auxiliary protein 2	-1.67635	0.0298582	17	17	53	54
Sphk1	sphingosine kinase 1	-1.67472	5.02e-08	136	113	385	403
PVRL1	-	-1.6701	4.19e-05	242	191	671	699
Cxcr4	chemokine (C-X-C motif) receptor 4	-1.66842	5.56e-07	603	1310	2740	3117
Tjp3	tight junction protein 3	-1.65643	9.99e-05	31.5	41	106.5	120
Myo1d	myosin ID	-1.65505	3.8e-12	583	771	1957.5	2220
Ephb1	Eph receptor B1	-1.65335	0.0469883	34	17	81	80
Col17a1	collagen, type XVII, alpha 1	-1.64917	0.00345283	198	154	535	564.5
Pla2g4b	phospholipase A2, group IVB (cytosolic)	-1.64256	0.000229921	97	64	231	273
Hspa2	heat shock protein 2	-1.64034	0.00581569	129	90	324	359
RGD1305807	-	-1.63899	4.01e-07	55	58	164	183
Zfand2a	zinc finger, AN1-type domain 2A	-1.63624	1.09e-15	694.5	901.5	2201.5	2674
Ptprf	protein tyrosine phosphatase, receptor type, F	-1.63503	0.00346719	575	295	1329	1400
Angptl4	angiopoietin-like 4	-1.63429	0.000463619	351	486	1199	1341
Pank1	pantothenate kinase 1	-1.63295	0.00296572	43	28	104	116
Spink2	serine peptidase inhibitor, Kazal type 2	-1.62499	0.0591424	13	15	40	45
Wnk4	WNK lysine deficient protein kinase 4	-1.62486	0.00154354	39	36	115	113
Cds1	CDP-diacylglycerol synthase 1	-1.62413	0.000177615	47	101	195	248
Cd69	CD69 antigen	-1.62216	0.000104643	72	178	329	414
Cdc42bpg	CDC42 binding protein kinase gamma (DMPK-like)	-1.61784	0.016677	224	86	468	501
Krt10	keratin 10	-1.6073	0.000349448	68	57	194	182
CCDC64	-	-1.60219	0.0420013	26	29	74	91
LOC689757	-	-1.60198	0.0005525	51.5	116.25	206	290.25
Fam110a	family with sequence similarity 110, member A	-1.5977	4.58e-08	172	128	449	453
Scml4	Scm polycomb group protein like 4	-1.59728	0.0552772	17.25	9.5	35.58	46
Lamc2	laminin, gamma 2	-1.59026	0.00552	71	93	221	264
Ppfia4	protein tyrosine phosphatase, receptor type, f polypeptide (PTPRF), interacting protein (liprin), alpha 4	-1.58595	0.0339512	81	39	175	189
Ptgr1	prostaglandin reductase 1	-1.585	1.29e-06	172	114	403	456
Fgfr3	fibroblast growth factor receptor 3	-1.58224	0.0354563	88	45	192	210
DOS	-	-1.57952	0.0362578	72.5	23	124.5	168.5
Clec2d	C-type lectin domain family 2, member d	-1.57481	0.075593	15.75	23	57.83	55
Pak6	p21 (RAC1) activated kinase 6	-1.57447	0.0749542	16	102	158	172
Nav2	neuron navigator 2	-1.55003	0.0215555	147	65	299	331
Kctd1	potassium channel tetramerisation domain containing 1	-1.5477	4.36e-05	67	60	165	204
Nrcam	neuronal cell adhesion molecule	-1.5473	3.05e-05	100	150	331	383
Klk6	kallikrein related-peptidase 6	-1.54403	0.0810101	33	19	74	78
Elovl6	ELOVL family member 6, elongation of long chain fatty acids (yeast)	-1.54171	0.00302323	46	34	101.67	130.67
Fth1	ferritin heavy polypeptide 1	-1.53832	1.38e-15	31179	44489	97943	117152
Ahrr	aryl-hydrocarbon receptor repressor	-1.52832	0.0856355	15	12	39	38
Aldh3b1	aldehyde dehydrogenase 3 family, member B1	-1.52776	4.08e-09	270	294	731	876
Sapcd2	suppressor APC domain containing 2	-1.52365	0.00283279	40	100	185	202
Mcemp1	mast cell expressed membrane protein 1	-1.5136	0.000623299	42	28	95	104
Fabp5	fatty acid binding protein 5, epidermal	-1.50349	1.38e-14	3573	5902	12159	13959
Mfap3l	microfibrillar-associated protein 3-like	-1.49905	0.0345851	119	111	294	352
Zfhx2	zinc finger homeobox 2	-1.4904	0.0141181	25	25	71	67
Robo1	roundabout guidance receptor 1	-1.4903	0.0122136	117.5	50	227	251.5
Col11a2	collagen, type XI, alpha 2	-1.48448	0.0110428	32.5	32.5	90	86.5
Pik3cb	phosphatidylinositol-4,5-bisphosphate 3-kinase catalytic subunit beta	-1.48138	2.46e-08	315	579.5	1104	1323
Mdfi	MyoD family inhibitor	-1.47779	0.00375243	61	43	137	152
Hspa4l	heat shock protein 4 like	-1.4726	0.0237671	25	27	69	73
Trem3	triggering receptor expressed on myeloid cells 3	-1.45837	0.00452595	28	48	92	112
Hmgcs1	3-hydroxy-3-methylglutaryl-Coenzyme A synthase 1	-1.45569	2.85e-09	558	850	1749	2019
Ccl2	chemokine (C-C motif) ligand 2	-1.45309	1.28e-07	1855	1225	3915	4562
Pla2g7	phospholipase A2, group VII (platelet-activating factor acetylhydrolase, plasma)	-1.45187	0.00108973	1154	3011	5011	5910
Wif1	Wnt inhibitory factor 1	-1.44875	0.0989633	12	16	35	40
Srxn1	sulfiredoxin 1 homolog (S. cerevisiae)	-1.44714	5.3e-15	399	563	1168	1403
Otub2	OTU domain, ubiquitin aldehyde binding 2	-1.44489	1.77e-05	127	104	268	361
Slc6a12	solute carrier family 6 (neurotransmitter transporter, betaine/GABA), member 12	-1.43458	0.00101173	78.75	181.5	304	377.5
Lpar3	lysophosphatidic acid receptor 3	-1.43438	0.0489556	35	42	107	96
Ogdhl	oxoglutarate dehydrogenase-like	-1.43027	0.0498822	18	19	49	49
Tm7sf2	transmembrane 7 superfamily member 2	-1.42982	0.024585	19	35	63	79
Pitrm1	pitrilysin metallepetidase 1	-1.42741	8.81e-18	1215	1126	2857	3399
Dok3	docking protein 3	-1.42456	3.06e-06	407	273	896	928
Lrrc8e	leucine rich repeat containing 8 family, member E	-1.40979	0.0660342	96	53	175.67	225.33
Ces1a	carboxylesterase 1A	-1.4093	0.0113329	30	41	78	108
Nqo1	NAD(P)H dehydrogenase, quinone 1	-1.40575	1.68e-17	425	425	992	1242
RGD1309350	-	-1.40485	0.024066	39	31	82	103
Kctd4	potassium channel tetramerisation domain containing 4	-1.40429	0.00549076	32	54	103	119
Cyfip2	cytoplasmic FMR1 interacting protein 2	-1.39736	2.06e-12	255	334	732	787
Rundc3a	RUN domain containing 3A	-1.38945	0.0390408	21	60	80	126
Nabp1	nucleic acid binding protein 1	-1.38728	1.66e-05	446	368	1017	1100
Tagln3	transgelin 3	-1.38526	0.0543795	88	101	235	250
Slc36a3	solute carrier family 36 (proton/amino acid symporter), member 3	-1.38305	0.094972	24	29	70	65
Efna4	ephrin A4	-1.38185	0.015004	48	40	113	114
Slc22a23	solute carrier family 22, member 23	-1.37651	0.0114814	116	55	219	229
Hmga1	high mobility group AT-hook 1	-1.37453	4.67e-05	125	149	339	358
Spib	Spi-B transcription factor (Spi-1/PU.1 related)	-1.37242	0.0110428	73	98	188	248
Tbc1d2	TBC1 domain family, member 2	-1.37077	9.59e-07	132	139	315	378
Slc22a4	solute carrier family 22 (organic cation transporter), member 4	-1.36878	0.015953	38	30	79	96
Dusp5	dual specificity phosphatase 5	-1.35532	6.31e-05	100	109	242	286
S1pr5	sphingosine-1-phosphate receptor 5	-1.34652	0.0581023	22	22	56	54
Egr3	early growth response 3	-1.34628	0.0317813	74	32	142	129
Clcf1	cardiotrophin-like cytokine factor 1	-1.34534	0.029812	50	39	114	110
Notch1	notch 1	-1.34439	0.00058	953	658	2028	2057
Tmem56	-	-1.34192	0.0119999	60	63	143	165
Bdkrb1	bradykinin receptor, beta 1	-1.33866	0.0849509	12	14	28	37
Galnt6	polypeptide N-acetylgalactosaminyltransferase 6	-1.33567	0.0207472	134	379	616	616
Sema4d	sema domain, immunoglobulin domain (Ig), transmembrane domain (TM) and short cytoplasmic domain, (semaphorin) 4D	-1.3325	5.39e-07	345	306	756	873
Chchd6	coiled-coil-helix-coiled-coil-helix domain containing 6	-1.32777	6.35e-08	269	294	630	767
Vdr	vitamin D (1,25-dihydroxyvitamin D3) receptor	-1.32338	0.0851811	68	55	141	166
Cdhr5	cadherin-related family member 5	-1.32014	0.0644451	55	56	128	146
Nkd2	naked cuticle 2	-1.32009	9.53e-07	268	261	615	692
Incenp	inner centromere protein	-1.31887	2.41e-07	185	303	547	640
Lrrc4	leucine rich repeat containing 4	-1.31848	0.0721256	24	17	47	55
Slc52a3	solute carrier protein family 52, member 3	-1.31824	0.00816974	40	82	157	135
Ccl4	chemokine (C-C motif) ligand 4	-1.31705	0.000203718	66	84	157	212
Ftl1	ferritin light polypeptide 1	-1.31659	1.1e-14	53493.6	61717.8	130996	151719
Trps1	transcriptional repressor GATA binding 1	-1.31569	0.000153832	139	173	342	423
Cbx2	chromobox 2	-1.31234	0.00563917	69	67	144	192
Egr1	early growth response 1	-1.31009	0.00643745	416	270	830	874
FAM65B	-	-1.30669	2.25e-11	3390	3649	8095.5	9082.17
Gstp1	glutathione S-transferase, pi 1	-1.30211	1.34e-26	1796	2126	4394	5128
Creg1	cellular repressor of E1A-stimulated genes 1	-1.29876	1.33e-07	869	1157	2197	2699
Gngt2	guanine nucleotide binding protein (G protein), gamma transducing activity polypeptide 2	-1.29744	2.37e-13	565.5	560.5	1270	1470.5
Bdh1	3-hydroxybutyrate dehydrogenase, type 1	-1.29409	1.95e-06	150	144	352	359
Plcxd2	phosphatidylinositol-specific phospholipase C, X domain containing 2	-1.29079	0.0350486	27	59	99	104
Hr	lysine demethylase and nuclear receptor corepressor	-1.27854	0.000138179	598	606	1332	1560
Stard10	START domain containing 10	-1.27441	0.0057959	175	105	333	346
Tceal7	transcription elongation factor A (SII)-like 7	-1.27356	0.0136204	323	148	542	614
Epha4	Eph receptor A4	-1.27111	0.00102258	114	87	216	269
Tuft1	tuftelin 1	-1.27062	2.72e-06	186	170	415.5	433
Slc4a11	solute carrier family 4, sodium bicarbonate transporter-like, member 11	-1.26927	0.0949384	26	24	66.5	52
Erbb2	erb-b2 receptor tyrosine kinase 2	-1.2676	0.0155983	203	126	355	443.5
Pax8	paired box 8	-1.26063	0.000289296	131	234	406	442
Cyp2s1	cytochrome P450, family 2, subfamily s, polypeptide 1	-1.25315	0.0028931	71	115	217	213
Ccl7	chemokine (C-C motif) ligand 7	-1.24796	0.000189387	1231	710	2104	2558
Tyro3	TYRO3 protein tyrosine kinase 3	-1.24684	0.00265424	87	83	183	217
Ephb6	Eph receptor B6	-1.24628	0.00943734	190	99	341	349
Nfil3	nuclear factor, interleukin 3, regulated	-1.24119	2.57e-05	123	136	279	325
Fzd3	frizzled class receptor 3	-1.24031	0.0320429	40	46	94	106
LOC681325	-	-1.23912	0.00589141	86	111	222	233
Igf2	insulin-like growth factor 2	-1.23288	0.0716	607	171	833	1058
Mgat5	mannoside acetylglucosaminyltransferase 5	-1.23148	0.0979864	44	43	82	122
Rhbdf2	rhomboid 5 homolog 2	-1.22653	5.18e-06	374	365	795	918
Hsd17b7	hydroxysteroid (17-beta) dehydrogenase 7	-1.2265	0.0813356	28	37.5	59	94.5
Gadd45a	growth arrest and DNA-damage-inducible 45 alpha	-1.21659	0.00177754	239	145	441	453
Nup210	nucleoporin 210	-1.21456	0.000125918	184	242	435	537
Jup	junction plakoglobin	-1.20947	0.00352628	1406	1386	3064	3318
Ephb3	Eph receptor B3	-1.20898	0.0290308	137	113	259	318
Itpr3	inositol 1,4,5-triphosphate receptor 3	-1.20861	0.00476539	530	399	1024	1119
Slc7a1	solute carrier family 7 (cationic amino acid transporter, y+ system), member 1	-1.20571	0.028454	247	290	581	636
Fgfr2	fibroblast growth factor receptor 2	-1.20557	0.000396141	162	138	326	361
Camta1	calmodulin binding transcription activator 1	-1.20365	0.0606314	80	52	148	156
Slc39a8	solute carrier family 39 (metal ion transporter), member 8	-1.20342	1.03e-12	443	465	1012	1046
Plk3	polo like kinase 3	-1.20312	2.88e-07	420	355	848	924
Selenbp1	selenium binding protein 1	-1.20306	2.88e-08	1485	1757	3505	3826
Uck2	uridine-cytidine kinase 2	-1.20142	0.00284475	110	140	266	298
Mpp7	membrane protein, palmitoylated 7 (MAGUK p55 subfamily member 7)	-1.20109	0.0520201	55	43	115	108
Scin	scinderin	-1.19291	0.049338	49	39	88	113
Atp6v1b2	ATPase, H+ transporting, lysosomal V1 subunit B2	-1.19186	2.61e-06	3445	5770	9374	11105
Slc20a2	solute carrier family 20, member 2	-1.19134	0.0256541	353	268	689	724
Abi3	ABI gene family, member 3	-1.18995	0.000199568	182.5	131.5	330	385.5
Fam167a	family with sequence similarity 167, member A	-1.18981	0.015953	214	219	441	538
Txnrd1	thioredoxin reductase 1	-1.18284	1.04e-16	869	1098	2034	2352
Rab3ip	RAB3A interacting protein	-1.1759	0.000925952	96	120	234	244
Slc7a5	solute carrier family 7 (cationic amino acid transporter, y+ system), member 5	-1.17379	0.00167629	233	219	459	554
Riok3	RIO kinase 3	-1.17355	4e-16	1234	1571	2783	3444
Idi1	isopentenyl-diphosphate delta isomerase	-1.17266	1.04e-07	223	252.5	507	546
Tnfrsf14	tumor necrosis factor receptor superfamily, member 14 (herpesvirus entry mediator)	-1.16812	0.000141649	110	120	236	274
Cpm	carboxypeptidase M	-1.16733	0.0278587	463.07	189.45	637.82	864.4
Phldb3	pleckstrin homology like domain, family B, member 3	-1.16557	0.00255763	80	76	165	181
Gcat	glycine C-acetyltransferase (2-amino-3-ketobutyrate-coenzyme A ligase)	-1.16084	0.0212927	64.64	45.76	113.52	133.75
Mir147	microRNA 147	-1.15713	0.000125918	99	158.5	256	304.5
Tnik	TRAF2 and NCK interacting kinase	-1.15313	0.0431468	65	45	118	126
Cxcl13	chemokine (C-X-C motif) ligand 13	-1.15313	0.00995264	800	788	1592	1912
Jmjd7	jumonji domain containing 7	-1.15062	0.0915288	21	27	54	50
MGC105649	-	-1.14969	3.33e-06	545	951.5	1463	1767.5
Zswim4	zinc finger SWIM-type containing 4	-1.14942	0.000296662	313	272	582	711
Cep70	centrosomal protein 70	-1.14521	0.0636634	24	42	68	74
Lpin3	lipin 3	-1.14122	0.00114741	321	341	692	747
Tcirg1	T cell, immune regulator 1, ATPase, H+ transporting, lysosomal V0 protein A3	-1.13927	4.36e-10	2035	3021	5087	5779
Tom1l1	target of myb1-like 1 (chicken)	-1.13507	0.00062038	121.5	110.5	231	275
Zdhhc21	zinc finger, DHHC domain containing 21	-1.13047	0.000413575	174	194	372.5	422.5
Cdkn1a	cyclin-dependent kinase inhibitor 1A (P21)	-1.12819	6.04e-07	827	903	1753	1976
Lmtk2	lemur tyrosine kinase 2	-1.12673	3.44e-11	351	411	769.5	867
Mvd	mevalonate (diphospho) decarboxylase	-1.12506	3.46e-05	155	208	392.5	380
Gabrr2	gamma-aminobutyric acid (GABA) C receptor, subunit rho 2	-1.1242	0.075593	37	86	111	149
Plin2	perilipin 2	-1.12319	2.06e-05	1912	3349.5	5160	5964
Plekhn1	pleckstrin homology domain containing, family N member 1	-1.11841	0.0053437	95	130	227	251
Igf2bp2	insulin-like growth factor 2 mRNA binding protein 2	-1.11683	0.00201227	77.5	64.5	142	163.5
Slc30a1	solute carrier family 30 (zinc transporter), member 1	-1.11483	0.000332984	537	964	1453	1702
Ddr1	discoidin domain receptor family, member 1	-1.11421	0.0119999	217	143	370	411
Igsf9	immunoglobulin superfamily, member 9	-1.11414	0.0543502	131	95	243	244
Pfkfb2	6-phosphofructo-2-kinase/fructose-2,6-biphosphatase 2	-1.11335	0.00255763	122	114	236	270
Socs3	suppressor of cytokine signaling 3	-1.11328	0.0231639	207	96	314	350
Gusb	glucuronidase, beta	-1.10688	2.51e-08	1529	2430	3944	4347
G6PD	-	-1.10522	1.95e-08	3107	5015	7738	9292
Ptprv	protein tyrosine phosphatase, receptor type, V	-1.10414	0.00497041	613	463	1125	1180
Rcan1	regulator of calcineurin 1	-1.1035	9.07e-06	643	601	1174	1487
Acap1	ArfGAP with coiled-coil, ankyrin repeat and PH domains 1	-1.10023	0.00074	167	228	397	431
Sqle	squalene epoxidase	-1.09906	2.4e-05	224	358	541	678
Acy3	aspartoacylase (aminoacylase) 3	-1.09864	0.00187344	240	192	437	484
Rab11fip1	RAB11 family interacting protein 1 (class I)	-1.09687	3.27e-05	386	556	901	1071
St14	suppression of tumorigenicity 14 (colon carcinoma)	-1.09609	2.82e-09	614	828	1415	1604
Elmo3	engulfment and cell motility 3	-1.09425	0.0014513	121.5	102.5	217	259
Dnph1	2'-deoxynucleoside 5'-phosphate N-hydrolase 1	-1.09253	0.0209755	58	50	96	134
Tjp2	tight junction protein 2	-1.09014	0.0211361	245	215	438	538
Unc13d	unc-13 homolog D	-1.08747	0.00424258	143	123	274	286
Map3k9	mitogen-activated protein kinase kinase kinase 9	-1.08356	0.0657545	53	56	113.5	113
Baiap2l1	BAI1-associated protein 2-like 1	-1.08298	0.0426197	46	65	109	121
Sdc4	syndecan 4	-1.0813	0.000572875	1086	681	1752	2010
Atp6v0b	ATPase, H+ transporting, lysosomal V0 subunit B	-1.07968	0.000243647	1436	1781	3115	3563
Gpr157	G protein-coupled receptor 157	-1.07744	0.097767	49	55	89	129
Tiam1	T cell lymphoma invasion and metastasis 1	-1.07502	0.00253812	375	527	844	1018
Syngr1	synaptogyrin 1	-1.07417	0.076696	36.5	42	73	89
Sqstm1	sequestosome 1	-1.07304	4.63e-20	3557	3934.5	7189.5	8362
Noct	-	-1.07296	0.000843377	120	132	235	289
Gsr	glutathione reductase	-1.06882	4.09e-08	448	602	1023	1133
LOC102554586	-	-1.06861	0.0397805	111	67	155	223
Fdps	farnesyl diphosphate synthetase	-1.06669	2.85e-09	771	902	1597	1854
Slc16a6	solute carrier family 16 (monocarboxylic acid transporters), member 6	-1.06542	0.0294244	88	65	167	150
Mier2	MIER family member 2	-1.05736	0.00656388	144	114	263	270
Wdr47	WD repeat domain 47	-1.05269	0.000308135	217	243	415	529
Trpv2	transient receptor potential cation channel, subfamily V, member 2	-1.04278	0.0114287	804	2173	2698	3175
Ctsz	cathepsin Z	-1.03912	1.34e-10	4093.5	5507	8840	10508
Nrip3	nuclear receptor interacting protein 3	-1.033	0.0499102	57	79	124	149
Sdc1	syndecan 1	-1.03297	2.97e-05	1988	3635	5143	6012
Zfp36	zinc finger protein 36	-1.03285	0.00062038	1124	1172	2204	2433
Gclc	glutamate-cysteine ligase, catalytic subunit	-1.0258	2.46e-09	521	727	1175	1310
Mgst2	microsomal glutathione S-transferase 2	-1.02467	0.0176749	398	250	616	710
Kifc2	kinesin family member C2	-1.02106	0.0587365	49	58	111.5	100
Tsen54	tRNA splicing endonuclease subunit 54	-1.01993	0.00889105	157	114	263	285
Smox	spermine oxidase	-1.01829	2.76e-05	286	273	527	594
Oscar	osteoclast associated receptor	-1.01512	0.00715889	67	93	162	153
Lap3	leucine aminopeptidase 3	-1.01272	1.95e-11	2532	2597	4771	5463
PPAP2C	-	-1.01255	0.0993662	121	59	181	185
Pstpip1	proline-serine-threonine phosphatase-interacting protein 1	-1.01093	0.000168974	463	862	1201	1387
Col27a1	collagen, type XXVII, alpha 1	-1.01046	0.0589992	293	219	489	541
Adgrg1	adhesion G protein-coupled receptor G1	-1.00758	0.0526871	716	379	1063	1161
Junb	jun B proto-oncogene	-1.00751	8.33e-05	1057	850	1782	2042
Sbk1	SH3-binding kinase 1	-1.00705	0.00363939	218	168	360	414
Cttnbp2	cortactin binding protein 2	-1.00555	0.0544899	71	61	139	122
Slc35e4	solute carrier family 35, member E4	-1.00037	0.00158565	539	480	988	1031

## Sheet: Control vs Metaseal
Dataset 3-3: Differentially downregulated genes of Metaseal group, as compared to those of control group.
Gene symbol	Gene name	log2 FC	FDR	Control_1 count	Control_2 count	Metaseal_1 count	Metaseal_2 count
Cda	cytidine deaminase	-6.77886	0.000205752	0	1	44	71
Slc17a3	solute carrier family 17 (sodium phosphate), member 3	-6.59478	0.000543956	1	0	53	45
Prl6a1	prolactin family 6, subfamily a, member 1	-6.37095	0.00098974	0	1	28	60
Bpifb1	BPI fold containing family B, member 1	-5.49722	0.011945	0	1	15	33
Cxcl3	chemokine (C-X-C motif) ligand 3	-5.23553	0.0185553	0	1	24	13
Gsg1	germ cell associated 1	-4.73076	5.19e-19	27	5	444	450
RGD1559493	-	-4.69112	0.0532444	0	1	14	12
Fgf23	fibroblast growth factor 23	-4.27839	0.0398231	7	0	3	165
Wfdc6a	WAP four-disulfide core domain 6A	-4.01656	0.000228754	2	3	42	40
Kcnh1	potassium voltage-gated channel, subfamily H (eag-related), member 1	-4.00373	2.04e-08	4	7	89	90
Prlhr	prolactin releasing hormone receptor	-3.99676	0.0715659	2	0	8	28
Il6	interleukin 6	-3.84409	3.29e-05	40	13	78	824
Dnaaf1	dynein, axonemal assembly factor 1	-3.73172	0.00112524	2	4	24	61
Gtsf1	gametocyte specific factor 1	-3.5399	9.17e-08	9	7	80	115
Nos2	nitric oxide synthase 2, inducible	-3.51266	0.00295023	24.5	57.5	714.75	138.5
Cxcl2	chemokine (C-X-C motif) ligand 2	-3.44975	1.83e-07	7	11	57	154
MT1A	-	-3.34949	1.1e-44	805	1055	6468	13683.8
Hspa1b	heat shock protein 1B	-3.31848	2.6e-58	704.65	760.45	5387.12	10141.6
Ltk	leukocyte tyrosine kinase	-3.29904	5.19e-07	8	18	79	192
Sez6l2	seizure related 6 homolog like 2	-3.2246	5.63e-09	10	28	188	164
Hspa1a	heat shock protein 1A	-3.17462	1.02e-17	165.5	141	800	2237
Tmem163	transmembrane protein 163	-3.16066	0.0715659	3	2	34	9
Fosb	FBJ osteosarcoma oncogene B	-3.04681	0.00622478	439	170	851	5014
Mthfd2l	methylenetetrahydrofolate dehydrogenase (NADP+ dependent) 2-like	-3.0352	1.98e-05	21	21	73	309
Plekhs1	pleckstrin homology domain containing, family S member 1	-3.01359	0.000543956	2	14	56	74
Havcr2	hepatitis A virus cellular receptor 2	-3.00743	2.64e-08	23	42	326	181
Tmem151a	transmembrane protein 151A	-2.99817	2.78e-05	8	11	85	67
Cxcl1	chemokine (C-X-C motif) ligand 1	-2.99159	0.000268102	38	14	73	405
Hmox1	heme oxygenase 1	-2.98767	2.94e-37	2658	4903	23533	38430
Il1a	interleukin 1 alpha	-2.97258	0.00321313	8	2	41	41
Clec4d	C-type lectin domain family 4, member d	-2.93688	6.54e-09	22	70	376	314
Prodh2	proline dehydrogenase (oxidase) 2	-2.91251	0.000963911	3	18	53	110
Gdf15	growth differentiation factor 15	-2.91066	3.01e-12	62	40	267	564
Slc12a5	solute carrier family 12, member 5	-2.87633	0.0324062	4	2	21	25
LOC290595	-	-2.75902	0.063389	162	98	1471	192
Ptprn	protein tyrosine phosphatase, receptor type, N	-2.72778	3.99e-07	73	49	541	259
Star	steroidogenic acute regulatory protein	-2.69569	0.00200728	22	8	129	67
Akr1b8	aldo-keto reductase family 1, member B8	-2.68509	3.78e-134	1238.83	1523	7912.33	10455.5
LILRB4	-	-2.66747	0.0982344	1952	204	9454	4774.67
Cym	chymosin	-2.65348	0.0431756	11	1	24	61
Sdcbp2	syndecan binding protein (syntenin) 2	-2.639	6.06e-08	15	42	172	184
Vsig4	V-set and immunoglobulin domain containing 4	-2.63519	0.000134556	42	22	99	347
Trem3	triggering receptor expressed on myeloid cells 3	-2.61435	8.25e-09	28	48	154.5	338
Cldn23	claudin 23	-2.61388	0.0102603	31	18	243	43
Ccl7	chemokine (C-C motif) ligand 7	-2.61043	4.52e-18	1231	710	5441	7139
Celsr3	cadherin, EGF LAG seven-pass G-type receptor 3	-2.59302	0.0135872	4	8	44	27
Lcn2	lipocalin 2	-2.55842	8.1e-12	90	250	830	1202
Akr1b10	aldo-keto reductase family 1, member B10 (aldose reductase)	-2.5103	6.48e-48	198.67	199.83	1008.67	1356.83
MT2A	-	-2.49964	2.39e-29	1592	1583	6687	12436.2
MGC93861	-	-2.49797	0.0982344	2	5	15	26
Serpinb2	serine (or cysteine) peptidase inhibitor, clade B, member 2	-2.48868	0.0149203	65	34	461	68
Slc11a1	solute carrier family 11 (proton-coupled divalent metal ion transporters), member 1	-2.48502	7.63e-36	579	975	4015	4831
Cpne4	copine IV	-2.44133	0.0146193	35	6	67	186
Ccl2	chemokine (C-C motif) ligand 2	-2.41881	1.07e-20	1855	1225	7706	9641
Prm2	protamine 2	-2.41692	0.0124446	4	27	50	121
Fosl1	fos-like antigen 1	-2.41179	9.19e-11	64	42	280	306
Fos	FBJ osteosarcoma oncogene	-2.40883	0.0023597	1072	331	2705	5593
Ccl12	chemokine (C-C motif) ligand 12	-2.40722	0.0391146	261	86	1352	485
Egr1	early growth response 1	-2.36355	4.1e-08	416	270	973	2952
Serpinb10	serine (or cysteine) peptidase inhibitor, clade B (ovalbumin), member 10	-2.35544	4.66e-05	25	39	196	126
Tac4	tachykinin 4	-2.34911	1.84e-09	36	32	163	196
Ccl3	chemokine (C-C motif) ligand 3	-2.34733	4.29e-07	120	299	574	1687
Celf3	CUGBP, Elav-like family member 3	-2.33592	0.0528184	5	4	22	25
Zfand2a	zinc finger, AN1-type domain 2A	-2.2342	1.86e-29	694.5	901.5	2816	5090.5
Mcemp1	mast cell expressed membrane protein 1	-2.22431	4.98e-08	42	28	167	171
Bdkrb1	bradykinin receptor, beta 1	-2.22275	0.000912258	12	14	53	73
Scml4	Scm polycomb group protein like 4	-2.22093	0.00363787	17.25	9.5	44	91.58
IRG1	-	-2.17614	0.00189113	27	86	334	146
Cfi	complement component factor i	-2.15447	0.000205752	26	25	74	170
Siglec15	sialic acid binding Ig-like lectin 15	-2.15047	0.0044409	7	13	40	51
Igf2bp2	insulin-like growth factor 2 mRNA binding protein 2	-2.08422	6.92e-11	77.5	64.5	253.67	380.5
KLRA22	-	-2.07139	0.0400733	15	32	28	190
RGD1305807	-	-2.05831	3.54e-11	55	58	205	285
Ptgr1	prostaglandin reductase 1	-2.04184	9.91e-11	172	114	483	773
Socs3	suppressor of cytokine signaling 3	-2.02075	2.49e-06	207	96	534	787
Scube3	signal peptide, CUB domain, EGF-like 3	-1.98677	0.0986012	20	8	84	25
Slfnl1	schlafen like 1	-1.98415	0.0982344	7	7	27	30
Ces1a	carboxylesterase 1A	-1.9828	0.000112631	30	41	90.5	209
Glod5	glyoxalase domain containing 5	-1.95016	0.0199161	12	9	32	54
Cdk18	cyclin-dependent kinase 18	-1.93528	0.0803195	4	6	19	20
Ccl4	chemokine (C-C motif) ligand 4	-1.92583	5.01e-09	66	84	217	382
Col5a3	collagen, type V, alpha 3	-1.91445	0.0272826	5517	5168	29515	9065
Car4	carbonic anhydrase 4	-1.91138	0.015517	6	41	80	95
Dlgap3	DLG associated protein 3	-1.89987	0.0803066	6	6	18	29
Fcnb	ficolin B	-1.89086	2.82e-11	90	153	433	481
Arnt2	aryl hydrocarbon receptor nuclear translocator 2	-1.87459	4.71e-05	31	74	159	235
Fth1	ferritin heavy polypeptide 1	-1.86455	7.76e-23	31179	44489	106071	182115
Srxn1	sulfiredoxin 1 homolog (S. cerevisiae)	-1.84369	1.87e-24	399	563	1425	2161
CHI3L1	-	-1.83846	4.99e-06	96	109	227	562
Slc6a12	solute carrier family 6 (neurotransmitter transporter, betaine/GABA), member 12	-1.83532	1.11e-05	78.75	181.5	333.75	632
Lag3	lymphocyte-activation gene 3	-1.83324	0.000297087	28	35	74	165
Csrnp1	cysteine-serine-rich nuclear protein 1	-1.8327	2.49e-11	234	205	592	1075
Prr7	proline rich 7 (synaptic)	-1.82714	0.000613659	49	36	174	132
Slc22a4	solute carrier family 22 (organic cation transporter), member 4	-1.82656	0.000570812	38	30	136	109
Egr3	early growth response 3	-1.82495	0.00173624	74	32	195	199
Nr4a3	nuclear receptor subfamily 4, group A, member 3	-1.81088	0.0118852	86	96	109	606
Runx3	runt related transcription factor 3	-1.80185	0.000232734	27	27	87	108
Clcf1	cardiotrophin-like cytokine factor 1	-1.79401	0.00188306	50	39	180	132
Fcrlb	Fc receptor-like B	-1.78901	0.0590442	7	17	42	41
Cdhr5	cadherin-related family member 5	-1.77989	0.00778345	55	56	262	108
Ndufa4l2	Ndufa4, mitochondrial complex associated like 2	-1.77912	0.00561608	144	213.5	879	281.5
Cebpb	CCAAT/enhancer binding protein (C/EBP), beta	-1.7713	5.33e-11	497	489	1822	1592
Zfp36	zinc finger protein 36	-1.77082	1.7e-10	1124	1172	2567	5867
Hspa1l	heat shock protein 1-like	-1.75976	0.000177623	82.5	56.5	221.5	267
Slc2a1	solute carrier family 2 (facilitated glucose transporter), member 1	-1.74541	3.91e-06	463	1174	2841	2558
Nabp1	nucleic acid binding protein 1	-1.73975	2.04e-08	446	368	919	2023
Cxcr4	chemokine (C-X-C motif) receptor 4	-1.72518	2.07e-07	603	1310	2233	4339
Tjp3	tight junction protein 3	-1.72102	4.89e-05	31.5	41	118	127.5
Sapcd2	suppressor APC domain containing 2	-1.71966	0.000604832	40	100	160	319
Tbc1d2	TBC1 domain family, member 2	-1.71318	2.23e-10	132	139	452	456
Sstr3	somatostatin receptor 3	-1.69817	0.0818601	9	15	42	36
Hormad2	HORMA domain containing 2	-1.69458	0.0662962	13	10	33	45
Epgn	epithelial mitogen	-1.68856	0.0148025	22	15	66	56
Slc16a3	solute carrier family 16 (monocarboxylic acid transporters), member 3	-1.68596	1.59e-06	484	1029.5	2645	2141
Clec2d	C-type lectin domain family 2, member d	-1.66611	0.065128	15.75	23	81.95	38
Il1b	interleukin 1 beta	-1.66013	0.000789318	257	197	363	1231
Nqo1	NAD(P)H dehydrogenase, quinone 1	-1.65316	2.4e-24	425	425	1205	1575
Creg1	cellular repressor of E1A-stimulated genes 1	-1.64834	6.06e-12	869	1157	2241	4481
Ccl11	chemokine (C-C motif) ligand 11	-1.64129	0.0468324	104	46	95	441
Tcp11l1	t-complex 11 like 1	-1.63491	7.18e-08	188	334	835	786
Nfkbiz	nuclear factor of kappa light polypeptide gene enhancer in B cells inhibitor, zeta	-1.63079	7.11e-17	293	357	827	1275
Dgki	diacylglycerol kinase, iota	-1.63001	0.0305482	14	32	40	111
Hmga1	high mobility group AT-hook 1	-1.60308	1.04e-06	125	149	465	370
Tubb3	tubulin, beta 3 class III	-1.60184	1.29e-14	226	327	739	990
Junb	jun B proto-oncogene	-1.58892	2.92e-11	1057	850	2379	3706
Aldh3b1	aldehyde dehydrogenase 3 family, member B1	-1.58738	8.49e-10	270	294	628	1169
Serpine1	serine (or cysteine) peptidase inhibitor, clade E, member 1	-1.58058	0.0535198	4786	3661	17713	6952
Cdh17	cadherin 17	-1.57897	0.0535198	16	78	89	200
Cxcl13	chemokine (C-X-C motif) ligand 13	-1.56918	0.000197473	800	788	1192	3999
Rhbdf2	rhomboid 5 homolog 2	-1.56438	1.6e-09	374	365	1180	1039
LOC689770	-	-1.5574	1.01e-06	72.5	107.25	253.17	283.5
Msr1	macrophage scavenger receptor 1	-1.55656	1.96e-06	620	885	2589.5	1773
Clec4e	C-type lectin domain family 4, member e	-1.55613	0.00577584	50	184	313	371
KIAA0895L	-	-1.54748	0.045283	30	20.5	91	56.5
Sh2b2	SH2B adaptor protein 2	-1.5386	2.33e-10	232	260	555	951
Fzd5	frizzled class receptor 5	-1.53683	0.0956722	13	11	38	33
Col6a4	collagen, type VI, alpha 4	-1.53528	0.0821535	23	13	63	43
Ampd3	adenosine monophosphate deaminase 3	-1.53215	1.38e-08	204	159	473	628
Sbno2	strawberry notch 2	-1.52971	5.39e-14	813	947	2649.5	2500
Osm	oncostatin M	-1.52195	0.00831113	23	37	88	86
Ceacam10	carcinoembryonic antigen-related cell adhesion molecule 10	-1.51991	0.0102401	33.67	59.67	157.67	107
LOC689757	-	-1.51021	0.00152522	51.5	116.25	234.67	244
Kctd4	potassium channel tetramerisation domain containing 4	-1.50782	0.00275453	32	54	85	172
Has1	hyaluronan synthase 1	-1.50495	0.0301571	355	122	392	1139
Rundc3a	RUN domain containing 3A	-1.49242	0.027724	21	60	104	125
NIACR1	-	-1.48013	0.0285399	19	70	91	163
Ftl1	ferritin light polypeptide 1	-1.47951	2.06e-18	53493.6	61717.8	123991	214851
SIGLEC10	-	-1.46876	4.61e-07	158	246	438	726
Col27a1	collagen, type XXVII, alpha 1	-1.46757	0.00283828	293	219	918	489
Kif21b	kinesin family member 21B	-1.45946	0.000132987	78	117	282	257
Cd69	CD69 antigen	-1.45921	0.000735481	72	178	265	441
Sntb1	syntrophin, basic 1	-1.4492	0.0114924	46	91	211	157
Cd27	CD27 antigen	-1.43923	0.0460207	32	46	57	171
Unc13a	unc-13 homolog A	-1.43498	0.0177893	81	79	283	142
Incenp	inner centromere protein	-1.4338	1.4e-08	185	303	545	817
Ptger4	prostaglandin E receptor 4 (subtype EP4)	-1.42995	0.000313465	94	71	191	278
Gabrr2	gamma-aminobutyric acid (GABA) C receptor, subunit rho 2	-1.42805	0.0182162	37	86	102	246
Ogdhl	oxoglutarate dehydrogenase-like	-1.42798	0.058279	18	19	38	67
Adamts14	a disintegrin-like and metallopeptidase (reprolysin type) with thrombospondin type 1 motif, 14	-1.42786	0.0108901	242	279	954.5	400.5
Sdc4	syndecan 4	-1.42656	1.96e-06	1086	681	2214	2800
FAM65B	-	-1.42006	2.81e-13	3390	3649	7248	12677.5
RGD1564664	-	-1.41786	0.0285251	129	77	149	464
Sgms2	sphingomyelin synthase 2	-1.41372	0.000438769	156	166	509	346
Fam110a	family with sequence similarity 110, member A	-1.40083	3.04e-06	172	128	371	457
Ncf2	neutrophil cytosolic factor 2	-1.39655	1.88e-07	453	815	1327	2122.5
Dok3	docking protein 3	-1.38085	7.36e-06	407	273	875	973
Dot1l	DOT1-like, histone H3 methyltransferase (S. cerevisiae)	-1.36494	3.38e-07	439	555	1395	1174
CLEC2DL1	-	-1.36478	0.0033587	169	103	395.33	324.5
Eml2	echinoderm microtubule associated protein like 2	-1.35761	3.46e-07	163	164	389	479
Atg4c	autophagy related 4C, cysteine peptidase	-1.35245	4.01e-10	264	388	788	910
Nr4a2	nuclear receptor subfamily 4, group A, member 2	-1.35051	0.00708785	104	129	165	478
Pgd	phosphogluconate dehydrogenase	-1.34781	4.61e-15	2439	3719	7087	8945
Rab20	RAB20, member RAS oncogene family	-1.34727	0.000156805	118	90	228	330
Lbp	lipopolysaccharide binding protein	-1.34662	3.04e-06	840	1406	1977	4027
Maff	v-maf musculoaponeurotic fibrosarcoma oncogene family, protein F (avian)	-1.34413	0.000912258	138	88	241	370
Lonrf3	LON peptidase N-terminal domain and ring finger 3	-1.3393	0.0377518	37	112	124	267
Sbsn	suprabasin	-1.33568	3.2e-08	349.25	571	920.5	1488.75
Gsr	glutathione reductase	-1.33521	1.93e-12	448	602	1294	1404
Kctd1	potassium channel tetramerisation domain containing 1	-1.33407	0.000745071	67	60	136	200
Slc39a8	solute carrier family 39 (metal ion transporter), member 8	-1.33378	1.49e-15	443	465	1036	1339
Riok3	RIO kinase 3	-1.32525	1.33e-20	1234	1571	3027	4261
Mab21l3	mab-21-like 3	-1.32487	0.0430648	25	24	50	79
Pla2g7	phospholipase A2, group VII (platelet-activating factor acetylhydrolase, plasma)	-1.32191	0.00425338	1154	3011	3105	7816
Sqstm1	sequestosome 1	-1.32178	1.05e-30	3557	3934.5	8129	11376
Erbb3	erb-b2 receptor tyrosine kinase 3	-1.31971	3.35e-13	511	500	1071	1575
Txnrd1	thioredoxin reductase 1	-1.31803	9.32e-21	869	1098	2108	2980
Acap1	ArfGAP with coiled-coil, ankyrin repeat and PH domains 1	-1.31498	3.31e-05	167	228	348	690
Spred3	sprouty-related EVH1 domain containing 3	-1.31286	0.0516932	46	36	112	96
Slc37a2	solute carrier family 37 (glycerol-3-phosphate transporter), member 2	-1.30537	2.04e-08	365	618	1132	1336.5
Dgkg	diacylglycerol kinase, gamma	-1.3034	0.0604132	30	29	79	69
Sphk1	sphingosine kinase 1	-1.3013	6.12e-05	136	113	313	319
G6PD	-	-1.29029	2.68e-11	3107	5015	8520	11890
Trib3	tribbles pseudokinase 3	-1.28941	0.0559807	17	24	46	57
Ppp1r15a	protein phosphatase 1, regulatory subunit 15A	-1.288	4.43e-08	618	625	1128	2100
PC	-	-1.28551	5.63e-06	356	384	643.5	1277
Fdxr	ferredoxin reductase	-1.28148	0.00322151	134	124	371	258
Slc52a3	solute carrier protein family 52, member 3	-1.27743	0.0130698	40	82	117	188
Ptk7	PTK7 protein tyrosine kinase 7	-1.27629	0.0111471	461	555	1634	750
Ch25h	cholesterol 25-hydroxylase	-1.27364	0.00191242	59	84	169	183
Pim1	proviral integration site 1	-1.272	6.34e-06	109	141	286	333
LOC681325	-	-1.2694	0.00534	86	111	280	191
AKR1C3	-	-1.26638	0.00152629	57	96	149	232
Fam129b	family with sequence similarity 129, member B	-1.25442	4.35e-10	1955.5	2533	5554.5	5258.5
Dusp1	dual specificity phosphatase 1	-1.2524	0.000281788	1914	1679	2638	6692
Pik3cb	phosphatidylinositol-4,5-bisphosphate 3-kinase catalytic subunit beta	-1.25177	4.94e-06	315	579.5	869.5	1324
Socs1	suppressor of cytokine signaling 1	-1.24998	0.00672338	61	65	161	143
LOC498276	-	-1.24382	2.02e-16	2715.73	3695.97	6348.41	9411.64
Nfil3	nuclear factor, interleukin 3, regulated	-1.24336	2.68e-05	123	136	233	414
PRAGMIN	-	-1.2369	0.0563941	114	156	430	182
Ankrd33b	ankyrin repeat domain 33B	-1.23662	0.0162709	59	48	98	170
LOC499781	-	-1.23096	0.00218406	84	80.5	199	195
Slc15a3	solute carrier family 15, member 3	-1.23025	1.17e-08	491	788	1355.5	1709.83
Kcnab2	potassium voltage-gated channel, shaker-related subfamily, beta member 2	-1.22768	3.99e-07	152	201	395	451
Gclc	glutamate-cysteine ligase, catalytic subunit	-1.22524	3.35e-13	521	727	1305	1697
Plk3	polo like kinase 3	-1.21792	2.07e-07	420	355	823	1061
Trib1	tribbles pseudokinase 1	-1.216	0.000160468	314	236	595	743
Rgs2	regulator of G-protein signaling 2	-1.21435	0.030518	281	416	363	1404
Pfkl	phosphofructokinase, liver, B-type	-1.20979	5.5e-05	673	996	2149	1684
Trem1	triggering receptor expressed on myeloid cells 1	-1.2094	2.69e-07	236	307	623.5	654
Rnf19b	ring finger protein 19B	-1.20808	3.58e-10	450	539	1137	1194
Dusp2	dual specificity phosphatase 2	-1.20713	0.000116965	79	94	160	258
Map3k9	mitogen-activated protein kinase kinase kinase 9	-1.20384	0.0410415	53	56	152	98
MGC105649	-	-1.20108	1.07e-06	545	951.5	1647	1830
Osgin1	oxidative stress induced growth inhibitor 1	-1.19775	0.000371033	126	147	227	436
Gstp1	glutathione S-transferase, pi 1	-1.19682	1.94e-22	1796	2126	3855	5498
Mapk13	mitogen-activated protein kinase 13	-1.17749	0.023876	86	46	152	160
Ncf1	neutrophil cytosolic factor 1	-1.17608	4.42e-09	989	1247	2596.5	2519.83
Pax8	paired box 8	-1.17171	0.00103013	131	234	307	549
Abi3	ABI gene family, member 3	-1.16945	0.000306343	182.5	131.5	342.5	394
Ptger2	prostaglandin E receptor 2 (subtype EP2)	-1.16238	0.00412561	66	124	178	259
Camk1d	calcium/calmodulin-dependent protein kinase ID	-1.16196	0.000477912	173	261	523	448
Wdr62	WD repeat domain 62	-1.15881	9.86e-07	191	227	453.5	502.5
Zc3h12a	zinc finger CCCH type containing 12A	-1.15589	1.22e-06	281	347	658.5	779
RGD1561778	-	-1.1435	0.00979306	460.44	442.77	1254.6	717.58
Emilin1	elastin microfibril interfacer 1	-1.1434	8.66e-05	1159	1862	3625	3003
Pstpip1	proline-serine-threonine phosphatase-interacting protein 1	-1.14242	1.51e-05	463	862	1278	1706
LOC362863	-	-1.14177	0.0921142	26	25	55	61
Itgb7	integrin beta 7	-1.13573	0.0220228	276	515	1074	604
LY6C	-	-1.13325	0.00546531	332.17	630.67	1225.58	835.7
Pdlim4	PDZ and LIM domain 4	-1.13259	0.000828843	853	619	1800	1499
Batf	basic leucine zipper transcription factor, ATF-like	-1.13102	0.00940697	93	100	145	306
Fgd6	FYVE, RhoGEF and PH domain containing 6	-1.12952	0.00128539	124	196	361	343
Fcho1	FCH domain only 1	-1.12637	0.0176261	64	42	114	127
RGD1559482	-	-1.12515	2.02e-22	3906.41	4493.65	8575.98	10292.6
Ifnlr1	interferon lambda receptor 1	-1.12122	0.017052	46	62	106	136
Mir147	microRNA 147	-1.12105	0.000253116	99	158.5	266	303
Kank4	KN motif and ankyrin repeat domains 4	-1.11999	0.0459057	43	79	117	154
Tnf	tumor necrosis factor	-1.11844	0.0346548	52	52	116	115
Hsph1	heat shock 105kDa/110kDa protein 1	-1.1117	8.69e-07	1139	1375	1994	3754
Nuak2	NUAK family, SNF1-like kinase, 2	-1.09825	0.0128106	181	382	392	872
Angptl4	angiopoietin-like 4	-1.09546	0.0400581	351	486	411	1545
Fcrla	Fc receptor-like A	-1.09386	0.0490415	73	79	94	257
Trpv2	transient receptor potential cation channel, subfamily V, member 2	-1.09252	0.00863096	804	2173	2516	3946
AGPAT9	-	-1.08974	0.0120665	89	76	177	185
Zswim4	zinc finger SWIM-type containing 4	-1.08353	0.000856596	313	272	679	583
Phlda1	pleckstrin homology like domain, family A, member 1	-1.08134	0.00155673	87	85	162	217
Jak3	Janus kinase 3	-1.0793	0.00076289	299	281.5	436	878
FCGR2A	-	-1.07922	3.07e-14	1352.66	1799.45	2895.06	3990.53
Grem1	gremlin 1, DAN family BMP antagonist	-1.07856	0.000434466	155	180	275	469
Atp6v1b2	ATPase, H+ transporting, lysosomal V1 subunit B2	-1.07817	3.37e-05	3445	5770	7188	13123
Cyfip2	cytoplasmic FMR1 interacting protein 2	-1.07707	2.07e-07	255	334	518	774
Snai1	snail family zinc finger 1	-1.07672	0.0122025	331	347.5	877	542
Bcl3	B cell leukemia/lymphoma 3	-1.07595	0.00011057	307	272	629	624
Irak2	interleukin-1 receptor-associated kinase 2	-1.07501	0.000120832	190	247	476	456
C6	complement component 6	-1.07246	0.0377927	1894	4304	3389	10498
Tnnt2	troponin T2, cardiac	-1.06984	0.0603089	52	62	72	185
Adamts4	a disintegrin-like and metallopeptidase (reprolysin type) with thrombospondin type 1 motif, 4	-1.06746	0.00195513	118.5	135	271.5	268
Ralgds	ral guanine nucleotide dissociation stimulator	-1.06518	6.04e-06	1598.5	1280.5	2516.5	3868.5
Plekhg2	pleckstrin homology domain containing, family G (with RhoGef domain) member 2	-1.06382	0.00290131	457	440	1090	792
Hsd11b1	hydroxysteroid 11-beta dehydrogenase 1	-1.06066	0.00427467	1032	818	1235	2972
Kdm1a	lysine (K)-specific demethylase 1A	-1.06007	7.25e-08	798	941	1430	2379
Ezr	ezrin	-1.05833	0.00457149	964	1020	2509	1587
Slc48a1	solute carrier family 48 (heme transporter), member 1	-1.05731	1.22e-12	885	1042	1895	2227
Gch1	GTP cyclohydrolase 1	-1.05725	0.0148025	71	99	174	186
Prdx1	peroxiredoxin 1	-1.05661	1.2e-11	5736	7399	11133	17370.5
Oscar	osteoclast associated receptor	-1.05636	0.00548898	67	93	144	200
Igsf3	immunoglobulin superfamily, member 3	-1.05426	0.00018904	460	385	909	895
LOC691931	-	-1.04955	0.0555604	53	93	156	147
Igsf8	immunoglobulin superfamily, member 8	-1.04884	3.97e-06	433	637	1075	1173
Tiam1	T cell lymphoma invasion and metastasis 1	-1.04821	0.00400839	375	527	1082	762
Cenpn	centromere protein N	-1.04604	0.00175253	86	123	174	275
Ptpn1	protein tyrosine phosphatase, non-receptor type 1	-1.04311	1.11e-06	301	404	686	801
Por	P450 (cytochrome) oxidoreductase	-1.03489	2.17e-09	1236	1626	2381	3734
Tnfrsf14	tumor necrosis factor receptor superfamily, member 14 (herpesvirus entry mediator)	-1.03476	0.00117549	110	120	226	259
Slc30a1	solute carrier family 30 (zinc transporter), member 1	-1.03402	0.00120776	537	964	1580	1488
Scamp5	secretory carrier membrane protein 5	-1.03226	0.0153365	106	87	160	258
Cxcl9	chemokine (C-X-C motif) ligand 9	-1.03186	0.0400733	418	694	589	1861
Bach1	BTB and CNC homology 1, basic leucine zipper transcription factor 1	-1.02442	9.14e-06	475.5	594.5	1125.67	1077.83
Col15a1	collagen, type XV, alpha 1	-1.02302	4.54e-10	5074	4803.5	9647.33	11115.5
Slc35e4	solute carrier family 35, member E4	-1.01863	0.00145089	539	480	1151.5	941
Rab11fip1	RAB11 family interacting protein 1 (class I)	-1.01838	0.000161029	386	556	995	924
Mmd	monocyte to macrophage differentiation-associated	-1.01812	0.00121423	173	203	273	533.5
Slc7a5	solute carrier family 7 (cationic amino acid transporter, y+ system), member 5	-1.01702	0.0102401	233	219	537	381
Ptgs2	prostaglandin-endoperoxide synthase 2	-1.01611	0.00322629	94	116	190	249
Kdm6b	KDM1 lysine (K)-specific demethylase 6B	-1.0124	5.02e-06	571	555	1145	1186
Unc13d	unc-13 homolog D	-1.01167	0.0106293	143	123	201	371
Ptcd3	pentatricopeptide repeat domain 3	-1.00963	1.38e-08	1908	2889	4193	5742
Gcnt2	glucosaminyl (N-acetyl) transferase 2, I-branching enzyme	-1.00904	0.00191572	195	224	301	594
Rbm47	RNA binding motif protein 47	-1.00895	0.0175766	79	141	220	226
Ubc	ubiquitin C	-1.00865	6.83e-10	6307.79	9117.69	13286.5	18750.4
Stk26	serine/threonine kinase 26	-1.00424	0.0833686	26	37	53	78
Smyd3	SET and MYND domain containing 3	-1.00388	0.0676682	87	54	108.5	196.5
Foxs1	forkhead box S1	-1.00222	0.0126817	193	135	336	345
Arid5a	AT rich interactive domain 5A (MRF1-like)	-1.00077	0.000197174	327	285	507	786
Ier2	immediate early response 2	-1.00056	0.00566338	764	485	1002	1683
